# Supplementary material
Source: publisher figshare collection journal article supplement (https://acs.figshare.com/ndownloader/files/4009036)
Supplement: Supplementary file 1 [file 4009036]

data_global

#==============================================================================

# SUBMISSION DETAILS

_publ_contact_author_name       'Axel Schulz'
_publ_contact_author_address
;
Universit\"at Rostock
Institut f\"ur Chemie
Abteilung f\"ur Anorganische Chemie
Albert-Einstein-Strasse 3a 
18059 Rostock
Bundesrepublik Deutschland
;
_publ_contact_author_email
;
axel.schulz@uni-rostock.de, alexander.villinger@uni-rostock.de'
;
_publ_contact_author_fax   '+49 (0)381/498-6382'
_publ_contact_author_phone '+49 (0)381/498-6400'
_publ_requested_journal    'Inorg.Chem.'


#==============================================================================

# TITLE AND AUTHOR LIST

_publ_section_title   
;
Synthesis and Structure of 1,3-Dichloro-cyclo-1,3-diphosphadiazanes: A New 
Synthetical Approach
;
_publ_section_title_footnote .

loop_
 _publ_author_name
 _publ_author_address
'Axel Schulz'
;
Universit\"at Rostock
Institut f\"ur Chemie
Abteilung f\"ur Anorganische Chemie
Albert-Einstein-Strasse 3a 
18059 Rostock
Bundesrepublik Deutschland

Leibniz-Institut f\"ur Katalyse e.V.
an der Universit\"at Rostock
Albert-Einstein-Strasse 29a
18059 Rostock
Bundesrepublik Deutschland 
;
'Alexander Villinger'
;
Universit\"at Rostock
Institut f\"ur Chemie
Abteilung f\"ur Anorganische Chemie
Albert-Einstein-Strasse 3a 
18059 Rostock
Bundesrepublik Deutschland
;
'Andrea Westenkirchner'
;
Universit\"at Rostock
Institut f\"ur Chemie
Abteilung f\"ur Anorganische Chemie
Albert-Einstein-Strasse 3a 
18059 Rostock
Bundesrepublik Deutschland
;

#=============================================================================
 
data_av_aw111_tritylNH2

_audit_author_name                'Villinger, A.' 
_audit_creation_method            SHELXL-97 

#==============================================================================

# CHEMICAL DATA

_chemical_name_systematic
;
Triphenylmethylamine
;
_chemical_name_common             ?
_chemical_melting_point           ?
_chemical_formula_moiety          'C19 H17 N'
_chemical_formula_sum
 'C19 H17 N'
_chemical_formula_weight          259.34
 
loop_
 _atom_type_symbol
 _atom_type_description
 _atom_type_scat_dispersion_real
 _atom_type_scat_dispersion_imag
 _atom_type_scat_source
 'C'  'C'   0.0033   0.0016
 'International Tables Vol C Tables 4.2.6.8 and 6.1.1.4'
 'H'  'H'   0.0000   0.0000
 'International Tables Vol C Tables 4.2.6.8 and 6.1.1.4'
 'N'  'N'   0.0061   0.0033
 'International Tables Vol C Tables 4.2.6.8 and 6.1.1.4'
 
#==============================================================================

# CRYSTAL DATA
 
_symmetry_cell_setting            triclinic
_symmetry_space_group_name_H-M    'P -1'
_symmetry_space_group_name_Hall   '-P 1'
_symmetry_Int_Tables_number       2
 
loop_
 _symmetry_equiv_pos_as_xyz
 'x, y, z'
 '-x, -y, -z'
 
_cell_length_a                    8.7276(4)
_cell_length_b                    8.9297(4)
_cell_length_c                    10.6603(5)
_cell_angle_alpha                 68.479(3)
_cell_angle_beta                  81.040(3)
_cell_angle_gamma                 64.415(2)
_cell_volume                      697.10(6)
_cell_formula_units_Z             2
_cell_measurement_temperature     173(2)
_cell_measurement_reflns_used     2521
_cell_measurement_theta_min       5.557
_cell_measurement_theta_max       47.914
 
_exptl_crystal_description        block
_exptl_crystal_colour             colourless
_exptl_crystal_size_max           0.40
_exptl_crystal_size_mid           0.18
_exptl_crystal_size_min           0.10
_exptl_crystal_density_meas       ?
_exptl_crystal_density_diffrn     1.236
_exptl_crystal_density_method     'not measured'
_exptl_crystal_F_000              276
_exptl_absorpt_coefficient_mu     0.071
_exptl_absorpt_correction_type    multi-scan
_exptl_absorpt_correction_T_min   0.9720
_exptl_absorpt_correction_T_max   0.9929
_exptl_absorpt_process_details    '(SADABS; Sheldrick, 2004)'

#==============================================================================

# EXPERIMENTAL DATA
 
_exptl_special_details
;
 ?
;
 
_diffrn_ambient_temperature       173(2)
_diffrn_radiation_wavelength      0.71073
_diffrn_radiation_type            MoK\a
_diffrn_radiation_source          'sealed tube'
_diffrn_radiation_monochromator   graphite
_diffrn_measurement_device_type   'Bruker Apex Kappa II-CCD-diffractometer'
_diffrn_measurement_method        'phi and omega scans'
_diffrn_detector_area_resol_mean  ?
_diffrn_standards_number          ?
_diffrn_standards_interval_count  ?
_diffrn_standards_interval_time   ?
_diffrn_standards_decay_%         ?
_diffrn_reflns_number             15288
_diffrn_reflns_av_R_equivalents   0.0468
_diffrn_reflns_av_sigmaI/netI     0.0517
_diffrn_reflns_limit_h_min        -10
_diffrn_reflns_limit_h_max        11
_diffrn_reflns_limit_k_min        -11
_diffrn_reflns_limit_k_max        11
_diffrn_reflns_limit_l_min        -13
_diffrn_reflns_limit_l_max        13
_diffrn_reflns_theta_min          2.59
_diffrn_reflns_theta_max          27.00
_reflns_number_total              3001
_reflns_number_gt                 1955
_reflns_threshold_expression      >2\s(I)
 
_computing_data_collection        'Bruker Apex V7.51A'
_computing_cell_refinement        'Bruker Apex V7.51A'
_computing_data_reduction         'Bruker SAINT'
_computing_structure_solution     'SHELXS-97 (Sheldrick, 1997)'
_computing_structure_refinement   'SHELXL-97 (Sheldrick, 1997)'
_computing_molecular_graphics     'ORTEP-3v2.01 (Farrugia, 1997)' 
_computing_publication_material   'SHELXL-97'

#==============================================================================

# REFINEMENT DATA 

_refine_special_details
;
 All H atoms (except H1/H2a/H2a which were constrained to be equidistant to N1) 
 were positioned geometrically and refined using a riding model, with C---H = 
 0.98 (methyl groups), 0.99\%A (methylene groups), 1.00\%A (methine groups) or 
 0.95 \%A (aryl CH) and with <i>U</i>~iso~(H) = 1.5 times <i>U</i>~eq~(C) 
 (methyl groups) or with <i>U</i>~iso~(H) = 1.2 times <i>U</i>~eq~(C) 
 (methylene  groups, aryl CH, methine groups). Torsion angles of all methyl 
 groups were allowed to refine.
 
 Refinement of F^2^ against ALL reflections.  The weighted R-factor wR and
 goodness of fit S are based on F^2^, conventional R-factors R are based
 on F, with F set to zero for negative F^2^. The threshold expression of
 F^2^ > 2\s(F^2^) is used only for calculating R-factors(gt) etc. and is
 not relevant to the choice of reflections for refinement.  R-factors based
 on F^2^ are statistically about twice as large as those based on F, and R-
 factors based on ALL data will be even larger.
;
 
_refine_ls_structure_factor_coef  Fsqd
_refine_ls_matrix_type            full
_refine_ls_weighting_scheme       calc
_refine_ls_weighting_details
 'calc w=1/[\s^2^(Fo^2^)+(0.0491P)^2^+0.0000P] where P=(Fo^2^+2Fc^2^)/3'
_atom_sites_solution_primary      direct
_atom_sites_solution_secondary    difmap
_atom_sites_solution_hydrogens    geom
_refine_ls_hydrogen_treatment     mixed
_refine_ls_extinction_method      none
_refine_ls_extinction_coef        ?
_refine_ls_number_reflns          3001
_refine_ls_number_parameters      194
_refine_ls_number_restraints      3
_refine_ls_R_factor_all           0.0856
_refine_ls_R_factor_gt            0.0440
_refine_ls_wR_factor_ref          0.1009
_refine_ls_wR_factor_gt           0.0910
_refine_ls_goodness_of_fit_ref    1.005
_refine_ls_restrained_S_all       1.004
_refine_ls_shift/su_max           0.000
_refine_ls_shift/su_mean          0.000

#==============================================================================

# ATOMIC COORDINATES AND DISPLACEMENT PARAMETERS
 
loop_
 _atom_site_label
 _atom_site_type_symbol
 _atom_site_fract_x
 _atom_site_fract_y
 _atom_site_fract_z
 _atom_site_U_iso_or_equiv
 _atom_site_adp_type
 _atom_site_occupancy
 _atom_site_symmetry_multiplicity
 _atom_site_calc_flag
 _atom_site_refinement_flags
 _atom_site_disorder_assembly
 _atom_site_disorder_group
N1 N 0.19777(17) 0.36965(17) 0.02975(12) 0.0336(3) Uani 1 1 d D . .
C1 C 0.24577(17) 0.32070(17) 0.17174(12) 0.0257(3) Uani 1 1 d . . .
C2 C 0.40636(17) 0.14806(17) 0.20930(13) 0.0257(3) Uani 1 1 d . . .
C3 C 0.43214(18) 0.02432(18) 0.33783(13) 0.0323(3) Uani 1 1 d . . .
H3 H 0.3489 0.0464 0.4054 0.039 Uiso 1 1 calc R . .
C4 C 0.57763(18) -0.13117(19) 0.36930(14) 0.0376(4) Uani 1 1 d . . .
H4 H 0.5929 -0.2144 0.4580 0.045 Uiso 1 1 calc R . .
C5 C 0.69906(19) -0.1659(2) 0.27416(15) 0.0393(4) Uani 1 1 d . . .
H5 H 0.7981 -0.2731 0.2956 0.047 Uiso 1 1 calc R . .
C6 C 0.6758(2) -0.0438(2) 0.14736(16) 0.0511(4) Uani 1 1 d . . .
H6 H 0.7601 -0.0661 0.0805 0.061 Uiso 1 1 calc R . .
C7 C 0.5319(2) 0.1111(2) 0.11547(14) 0.0428(4) Uani 1 1 d . . .
H7 H 0.5188 0.1942 0.0269 0.051 Uiso 1 1 calc R . .
C8 C 0.27347(17) 0.47142(17) 0.18665(12) 0.0254(3) Uani 1 1 d . . .
C9 C 0.41917(18) 0.44733(19) 0.24214(13) 0.0320(3) Uani 1 1 d . . .
H9 H 0.5088 0.3331 0.2709 0.038 Uiso 1 1 calc R . .
C10 C 0.43592(19) 0.5876(2) 0.25625(14) 0.0380(4) Uani 1 1 d . . .
H10 H 0.5367 0.5688 0.2945 0.046 Uiso 1 1 calc R . .
C11 C 0.30832(19) 0.75319(19) 0.21549(13) 0.0361(4) Uani 1 1 d . . .
H11 H 0.3201 0.8491 0.2255 0.043 Uiso 1 1 calc R . .
C12 C 0.16211(19) 0.77967(19) 0.15970(13) 0.0363(4) Uani 1 1 d . . .
H12 H 0.0730 0.8943 0.1312 0.044 Uiso 1 1 calc R . .
C13 C 0.14529(18) 0.64037(18) 0.14534(13) 0.0306(3) Uani 1 1 d . . .
H13 H 0.0444 0.6601 0.1066 0.037 Uiso 1 1 calc R . .
C14 C 0.09777(16) 0.29332(17) 0.26157(13) 0.0271(3) Uani 1 1 d . . .
C15 C 0.01091(18) 0.21141(18) 0.23183(15) 0.0356(4) Uani 1 1 d . . .
H15 H 0.0401 0.1781 0.1534 0.043 Uiso 1 1 calc R . .
C16 C -0.1171(2) 0.1779(2) 0.31475(17) 0.0448(4) Uani 1 1 d . . .
H16 H -0.1747 0.1212 0.2932 0.054 Uiso 1 1 calc R . .
C17 C -0.16185(19) 0.2257(2) 0.42801(17) 0.0458(4) Uani 1 1 d . . .
H17 H -0.2507 0.2034 0.4844 0.055 Uiso 1 1 calc R . .
C18 C -0.0772(2) 0.3063(2) 0.45934(15) 0.0419(4) Uani 1 1 d . . .
H18 H -0.1070 0.3393 0.5379 0.050 Uiso 1 1 calc R . .
C19 C 0.05146(18) 0.33927(18) 0.37669(13) 0.0332(4) Uani 1 1 d . . .
H19 H 0.1093 0.3948 0.3995 0.040 Uiso 1 1 calc R . .
H1 H 0.268(2) 0.425(2) -0.0304(15) 0.071(6) Uiso 1 1 d D . .
H2A H 0.0830(17) 0.460(3) 0.022(2) 0.029(9) Uiso 0.51(3) 1 d PD . .
H2B H 0.244(3) 0.272(3) -0.005(3) 0.044(11) Uiso 0.49(3) 1 d PD . .
 
loop_
 _atom_site_aniso_label
 _atom_site_aniso_U_11
 _atom_site_aniso_U_22
 _atom_site_aniso_U_33
 _atom_site_aniso_U_23
 _atom_site_aniso_U_13
 _atom_site_aniso_U_12
N1 0.0326(8) 0.0320(8) 0.0324(6) -0.0134(6) -0.0074(6) -0.0052(6)
C1 0.0253(8) 0.0245(7) 0.0271(7) -0.0093(5) -0.0037(6) -0.0082(6)
C2 0.0243(8) 0.0237(8) 0.0325(7) -0.0120(6) -0.0032(6) -0.0095(6)
C3 0.0267(8) 0.0311(8) 0.0339(7) -0.0086(6) -0.0007(6) -0.0090(7)
C4 0.0318(9) 0.0305(9) 0.0410(8) -0.0025(7) -0.0083(7) -0.0094(7)
C5 0.0296(9) 0.0297(9) 0.0507(9) -0.0148(7) -0.0080(7) -0.0014(7)
C6 0.0393(10) 0.0497(11) 0.0432(9) -0.0191(8) 0.0035(8) 0.0022(9)
C7 0.0399(10) 0.0388(10) 0.0306(8) -0.0094(7) 0.0022(7) -0.0015(8)
C8 0.0255(8) 0.0251(8) 0.0251(6) -0.0083(5) 0.0027(6) -0.0109(6)
C9 0.0279(8) 0.0293(8) 0.0375(8) -0.0092(6) -0.0037(6) -0.0108(7)
C10 0.0389(10) 0.0399(10) 0.0429(8) -0.0129(7) -0.0042(7) -0.0223(8)
C11 0.0488(10) 0.0317(9) 0.0367(8) -0.0138(7) 0.0039(7) -0.0235(8)
C12 0.0402(9) 0.0259(8) 0.0396(8) -0.0116(6) 0.0016(7) -0.0105(7)
C13 0.0279(8) 0.0273(8) 0.0355(7) -0.0103(6) -0.0004(6) -0.0103(7)
C14 0.0220(8) 0.0201(7) 0.0341(7) -0.0065(6) -0.0054(6) -0.0043(6)
C15 0.0304(8) 0.0293(8) 0.0482(9) -0.0138(7) -0.0060(7) -0.0104(7)
C16 0.0327(9) 0.0381(10) 0.0665(11) -0.0129(8) -0.0051(8) -0.0191(8)
C17 0.0305(9) 0.0397(10) 0.0585(10) -0.0054(8) 0.0052(8) -0.0174(8)
C18 0.0389(9) 0.0427(10) 0.0402(8) -0.0113(7) 0.0069(7) -0.0176(8)
C19 0.0309(9) 0.0334(9) 0.0356(8) -0.0105(6) 0.0003(6) -0.0145(7)

#==============================================================================

# MOLECULAR GEOMETRY
 
_geom_special_details
;
 All s.u.'s (except the s.u. in the dihedral angle between two l.s. planes)
 are estimated using the full covariance matrix.  The cell s.u.'s are taken
 into account individually in the estimation of s.u.'s in distances, angles
 and torsion angles; correlations between s.u.'s in cell parameters are only
 used when they are defined by crystal symmetry.  An approximate (isotropic)
 treatment of cell s.u.'s is used for estimating s.u.'s involving l.s. planes.
;
 
loop_
 _geom_bond_atom_site_label_1
 _geom_bond_atom_site_label_2
 _geom_bond_distance
 _geom_bond_site_symmetry_2
 _geom_bond_publ_flag
N1 C1 1.4872(16) . ?
N1 H1 0.970(12) . ?
N1 H2A 0.970(12) . ?
N1 H2B 0.970(12) . ?
C1 C8 1.5313(17) . ?
C1 C2 1.5353(19) . ?
C1 C14 1.5366(18) . ?
C2 C7 1.378(2) . ?
C2 C3 1.3854(17) . ?
C3 C4 1.3860(19) . ?
C3 H3 0.9500 . ?
C4 C5 1.364(2) . ?
C4 H4 0.9500 . ?
C5 C6 1.367(2) . ?
C5 H5 0.9500 . ?
C6 C7 1.376(2) . ?
C6 H6 0.9500 . ?
C7 H7 0.9500 . ?
C8 C9 1.3849(17) . ?
C8 C13 1.3892(18) . ?
C9 C10 1.3843(19) . ?
C9 H9 0.9500 . ?
C10 C11 1.368(2) . ?
C10 H10 0.9500 . ?
C11 C12 1.3822(19) . ?
C11 H11 0.9500 . ?
C12 C13 1.3772(18) . ?
C12 H12 0.9500 . ?
C13 H13 0.9500 . ?
C14 C19 1.3819(19) . ?
C14 C15 1.3907(17) . ?
C15 C16 1.381(2) . ?
C15 H15 0.9500 . ?
C16 C17 1.371(2) . ?
C16 H16 0.9500 . ?
C17 C18 1.374(2) . ?
C17 H17 0.9500 . ?
C18 C19 1.3820(19) . ?
C18 H18 0.9500 . ?
C19 H19 0.9500 . ?
 
loop_
 _geom_angle_atom_site_label_1
 _geom_angle_atom_site_label_2
 _geom_angle_atom_site_label_3
 _geom_angle
 _geom_angle_site_symmetry_1
 _geom_angle_site_symmetry_3
 _geom_angle_publ_flag
C1 N1 H1 109.3(10) . . ?
C1 N1 H2A 103.5(14) . . ?
H1 N1 H2A 107.3(18) . . ?
C1 N1 H2B 114.4(17) . . ?
H1 N1 H2B 91(2) . . ?
H2A N1 H2B 129(2) . . ?
N1 C1 C8 108.98(10) . . ?
N1 C1 C2 109.44(11) . . ?
C8 C1 C2 111.48(10) . . ?
N1 C1 C14 107.41(10) . . ?
C8 C1 C14 109.95(11) . . ?
C2 C1 C14 109.49(10) . . ?
C7 C2 C3 117.30(13) . . ?
C7 C2 C1 120.77(12) . . ?
C3 C2 C1 121.92(12) . . ?
C2 C3 C4 120.95(14) . . ?
C2 C3 H3 119.5 . . ?
C4 C3 H3 119.5 . . ?
C5 C4 C3 120.65(13) . . ?
C5 C4 H4 119.7 . . ?
C3 C4 H4 119.7 . . ?
C4 C5 C6 118.89(15) . . ?
C4 C5 H5 120.6 . . ?
C6 C5 H5 120.6 . . ?
C5 C6 C7 120.77(15) . . ?
C5 C6 H6 119.6 . . ?
C7 C6 H6 119.6 . . ?
C6 C7 C2 121.41(13) . . ?
C6 C7 H7 119.3 . . ?
C2 C7 H7 119.3 . . ?
C9 C8 C13 118.01(12) . . ?
C9 C8 C1 123.22(12) . . ?
C13 C8 C1 118.76(11) . . ?
C10 C9 C8 120.84(14) . . ?
C10 C9 H9 119.6 . . ?
C8 C9 H9 119.6 . . ?
C11 C10 C9 120.48(13) . . ?
C11 C10 H10 119.8 . . ?
C9 C10 H10 119.8 . . ?
C10 C11 C12 119.45(13) . . ?
C10 C11 H11 120.3 . . ?
C12 C11 H11 120.3 . . ?
C13 C12 C11 120.18(14) . . ?
C13 C12 H12 119.9 . . ?
C11 C12 H12 119.9 . . ?
C12 C13 C8 121.05(13) . . ?
C12 C13 H13 119.5 . . ?
C8 C13 H13 119.5 . . ?
C19 C14 C15 117.64(13) . . ?
C19 C14 C1 122.40(11) . . ?
C15 C14 C1 119.88(12) . . ?
C16 C15 C14 120.88(15) . . ?
C16 C15 H15 119.6 . . ?
C14 C15 H15 119.6 . . ?
C17 C16 C15 120.50(14) . . ?
C17 C16 H16 119.7 . . ?
C15 C16 H16 119.7 . . ?
C16 C17 C18 119.49(14) . . ?
C16 C17 H17 120.3 . . ?
C18 C17 H17 120.3 . . ?
C17 C18 C19 120.04(15) . . ?
C17 C18 H18 120.0 . . ?
C19 C18 H18 120.0 . . ?
C14 C19 C18 121.46(13) . . ?
C14 C19 H19 119.3 . . ?
C18 C19 H19 119.3 . . ?
 
loop_
 _geom_torsion_atom_site_label_1
 _geom_torsion_atom_site_label_2
 _geom_torsion_atom_site_label_3
 _geom_torsion_atom_site_label_4
 _geom_torsion
 _geom_torsion_site_symmetry_1
 _geom_torsion_site_symmetry_2
 _geom_torsion_site_symmetry_3
 _geom_torsion_site_symmetry_4
 _geom_torsion_publ_flag
N1 C1 C2 C7 35.22(16) . . . . ?
C8 C1 C2 C7 -85.41(15) . . . . ?
C14 C1 C2 C7 152.70(12) . . . . ?
N1 C1 C2 C3 -145.28(12) . . . . ?
C8 C1 C2 C3 94.09(13) . . . . ?
C14 C1 C2 C3 -27.80(16) . . . . ?
C7 C2 C3 C4 -0.89(19) . . . . ?
C1 C2 C3 C4 179.60(11) . . . . ?
C2 C3 C4 C5 0.0(2) . . . . ?
C3 C4 C5 C6 0.7(2) . . . . ?
C4 C5 C6 C7 -0.5(2) . . . . ?
C5 C6 C7 C2 -0.3(2) . . . . ?
C3 C2 C7 C6 1.0(2) . . . . ?
C1 C2 C7 C6 -179.43(14) . . . . ?
N1 C1 C8 C9 -127.87(13) . . . . ?
C2 C1 C8 C9 -6.97(17) . . . . ?
C14 C1 C8 C9 114.65(13) . . . . ?
N1 C1 C8 C13 53.53(15) . . . . ?
C2 C1 C8 C13 174.44(11) . . . . ?
C14 C1 C8 C13 -63.94(14) . . . . ?
C13 C8 C9 C10 0.20(19) . . . . ?
C1 C8 C9 C10 -178.41(12) . . . . ?
C8 C9 C10 C11 0.0(2) . . . . ?
C9 C10 C11 C12 -0.1(2) . . . . ?
C10 C11 C12 C13 0.0(2) . . . . ?
C11 C12 C13 C8 0.2(2) . . . . ?
C9 C8 C13 C12 -0.31(19) . . . . ?
C1 C8 C13 C12 178.35(11) . . . . ?
N1 C1 C14 C19 -144.38(13) . . . . ?
C8 C1 C14 C19 -25.93(16) . . . . ?
C2 C1 C14 C19 96.87(14) . . . . ?
N1 C1 C14 C15 38.99(16) . . . . ?
C8 C1 C14 C15 157.44(11) . . . . ?
C2 C1 C14 C15 -79.75(14) . . . . ?
C19 C14 C15 C16 0.1(2) . . . . ?
C1 C14 C15 C16 176.89(12) . . . . ?
C14 C15 C16 C17 0.4(2) . . . . ?
C15 C16 C17 C18 -0.6(2) . . . . ?
C16 C17 C18 C19 0.3(2) . . . . ?
C15 C14 C19 C18 -0.4(2) . . . . ?
C1 C14 C19 C18 -177.07(12) . . . . ?
C17 C18 C19 C14 0.2(2) . . . . ?
 
_diffrn_measured_fraction_theta_max    0.988
_diffrn_reflns_theta_full              27.00
_diffrn_measured_fraction_theta_full   0.988
_refine_diff_density_max    0.156
_refine_diff_density_min   -0.176
_refine_diff_density_rms    0.038

#=============================================================================
 
data_av191_tritylNHPCl2

_audit_author_name                'Villinger, A.' 
_audit_creation_method            SHELXL-97 

#==============================================================================

# CHEMICAL DATA

_chemical_name_systematic
;
Triphenylmethylamino(dichloro)phosphane
;
_chemical_name_common             ?
_chemical_melting_point           ?
_chemical_formula_moiety          'C19 H16 Cl2 N P'
_chemical_formula_sum
 'C19 H16 Cl2 N P'
_chemical_formula_weight          360.20
 
loop_
 _atom_type_symbol
 _atom_type_description
 _atom_type_scat_dispersion_real
 _atom_type_scat_dispersion_imag
 _atom_type_scat_source
 'C'  'C'   0.0033   0.0016
 'International Tables Vol C Tables 4.2.6.8 and 6.1.1.4'
 'H'  'H'   0.0000   0.0000
 'International Tables Vol C Tables 4.2.6.8 and 6.1.1.4'
 'N'  'N'   0.0061   0.0033
 'International Tables Vol C Tables 4.2.6.8 and 6.1.1.4'
 'P'  'P'   0.1023   0.0942
 'International Tables Vol C Tables 4.2.6.8 and 6.1.1.4'
 'Cl'  'Cl'   0.1484   0.1585
 'International Tables Vol C Tables 4.2.6.8 and 6.1.1.4'
 
#==============================================================================

# CRYSTAL DATA
 
_symmetry_cell_setting            triclinic
_symmetry_space_group_name_H-M    'P -1'
_symmetry_space_group_name_Hall   '-P 1'
_symmetry_Int_Tables_number       2
 
loop_
 _symmetry_equiv_pos_as_xyz
 'x, y, z'
 '-x, -y, -z'
 
_cell_length_a                    8.8293(5)
_cell_length_b                    10.0398(6)
_cell_length_c                    19.9325(12)
_cell_angle_alpha                 103.431(2)
_cell_angle_beta                  95.608(2)
_cell_angle_gamma                 90.606(2)
_cell_volume                      1709.34(17)
_cell_formula_units_Z             4
_cell_measurement_temperature     173(2)
_cell_measurement_reflns_used     4080 
_cell_measurement_theta_min       5.101 
_cell_measurement_theta_max       65.234
 
_exptl_crystal_description        block
_exptl_crystal_colour             colourless
_exptl_crystal_size_max           0.30
_exptl_crystal_size_mid           0.22
_exptl_crystal_size_min           0.18
_exptl_crystal_density_meas       ?
_exptl_crystal_density_diffrn     1.400
_exptl_crystal_density_method     'not measured'
_exptl_crystal_F_000              744
_exptl_absorpt_coefficient_mu     0.471
_exptl_absorpt_correction_type    multi-scan
_exptl_absorpt_correction_T_min   0.8715
_exptl_absorpt_correction_T_max   0.9200
_exptl_absorpt_process_details    '(SADABS; Sheldrick, 2004)'

#==============================================================================

# EXPERIMENTAL DATA
 
_exptl_special_details
;
 ?
;
 
_diffrn_ambient_temperature       173(2)
_diffrn_radiation_wavelength      0.71073
_diffrn_radiation_type            MoK\a
_diffrn_radiation_source          'sealed tube'
_diffrn_radiation_monochromator   graphite
_diffrn_measurement_device_type   'Bruker-Nonius Apex X8-CCD-diffractometer'
_diffrn_measurement_method        'phi and omega scans'
_diffrn_detector_area_resol_mean  ?
_diffrn_standards_number          ?
_diffrn_standards_interval_count  ?
_diffrn_standards_interval_time   ?
_diffrn_standards_decay_%         ?
_diffrn_reflns_number             20794
_diffrn_reflns_av_R_equivalents   0.0285
_diffrn_reflns_av_sigmaI/netI     0.0403
_diffrn_reflns_limit_h_min        -12
_diffrn_reflns_limit_h_max        10
_diffrn_reflns_limit_k_min        -13
_diffrn_reflns_limit_k_max        13
_diffrn_reflns_limit_l_min        -27
_diffrn_reflns_limit_l_max        27
_diffrn_reflns_theta_min          1.06
_diffrn_reflns_theta_max          29.00
_reflns_number_total              8875
_reflns_number_gt                 6793
_reflns_threshold_expression      >2\s(I)
 
_computing_data_collection        'Bruker Apex V7.51A'
_computing_cell_refinement        'Bruker Apex V7.51A'
_computing_data_reduction         'Bruker SAINT'
_computing_structure_solution     'SHELXS-97 (Sheldrick, 1997)'
_computing_structure_refinement   'SHELXL-97 (Sheldrick, 1997)'
_computing_molecular_graphics     'ORTEP-3v2.01 (Farrugia, 1997)' 
_computing_publication_material   'SHELXL-97'

#==============================================================================

# REFINEMENT DATA 

_refine_special_details
;
 All H atoms (except H1/H2) were positioned geometrically and refined using a 
 riding model, with C---H = 0.98 (methyl groups), 0.99\%A (methylene groups), 
 1.00\%A (methine groups) or 0.95 \%A (aryl CH) and with <i>U</i>~iso~(H) = 
 1.5 times <i>U</i>~eq~(C) (methyl groups) or with <i>U</i>~iso~(H) = 1.2 times 
 <i>U</i>~eq~(C) (methylene  groups, aryl CH, methine groups). Torsion angles 
 of all methyl groups were allowed to refine.
 
 Refinement of F^2^ against ALL reflections.  The weighted R-factor wR and
 goodness of fit S are based on F^2^, conventional R-factors R are based
 on F, with F set to zero for negative F^2^. The threshold expression of
 F^2^ > 2\s(F^2^) is used only for calculating R-factors(gt) etc. and is
 not relevant to the choice of reflections for refinement.  R-factors based
 on F^2^ are statistically about twice as large as those based on F, and R-
 factors based on ALL data will be even larger.
;
 
_refine_ls_structure_factor_coef  Fsqd
_refine_ls_matrix_type            full
_refine_ls_weighting_scheme       calc
_refine_ls_weighting_details
 'calc w=1/[\s^2^(Fo^2^)+(0.0677P)^2^+0.0000P] where P=(Fo^2^+2Fc^2^)/3'
_atom_sites_solution_primary      direct
_atom_sites_solution_secondary    difmap
_atom_sites_solution_hydrogens    geom
_refine_ls_hydrogen_treatment     mixed
_refine_ls_extinction_method      none
_refine_ls_extinction_coef        ?
_refine_ls_number_reflns          8875
_refine_ls_number_parameters      423
_refine_ls_number_restraints      0
_refine_ls_R_factor_all           0.0616
_refine_ls_R_factor_gt            0.0422
_refine_ls_wR_factor_ref          0.1168
_refine_ls_wR_factor_gt           0.1096
_refine_ls_goodness_of_fit_ref    1.069
_refine_ls_restrained_S_all       1.069
_refine_ls_shift/su_max           0.001
_refine_ls_shift/su_mean          0.000

#==============================================================================

# ATOMIC COORDINATES AND DISPLACEMENT PARAMETERS
 
loop_
 _atom_site_label
 _atom_site_type_symbol
 _atom_site_fract_x
 _atom_site_fract_y
 _atom_site_fract_z
 _atom_site_U_iso_or_equiv
 _atom_site_adp_type
 _atom_site_occupancy
 _atom_site_symmetry_multiplicity
 _atom_site_calc_flag
 _atom_site_refinement_flags
 _atom_site_disorder_assembly
 _atom_site_disorder_group
P1 P 0.29134(5) 0.32132(5) 0.31222(2) 0.02257(11) Uani 1 1 d . . .
Cl1 Cl 0.43091(6) 0.48700(5) 0.30666(3) 0.03537(12) Uani 1 1 d . . .
Cl2 Cl 0.08728(6) 0.41918(6) 0.29997(3) 0.04196(14) Uani 1 1 d . . .
C8 C 0.33155(18) 0.08228(16) 0.38144(8) 0.0178(3) Uani 1 1 d . . .
C1 C 0.36896(18) 0.22373(16) 0.43052(8) 0.0167(3) Uani 1 1 d . . .
C2 C 0.29212(18) 0.23349(17) 0.49779(8) 0.0177(3) Uani 1 1 d . . .
N1 N 0.30036(17) 0.32970(15) 0.39597(7) 0.0205(3) Uani 1 1 d . . .
C14 C 0.54244(18) 0.25118(16) 0.44626(8) 0.0182(3) Uani 1 1 d . . .
C15 C 0.6306(2) 0.25277(18) 0.39173(9) 0.0237(4) Uani 1 1 d . . .
H15 H 0.5820 0.2393 0.3459 0.028 Uiso 1 1 calc R . .
C9 C 0.4388(2) -0.01949(17) 0.37135(9) 0.0222(3) Uani 1 1 d . . .
H9 H 0.5400 0.0001 0.3928 0.027 Uiso 1 1 calc R . .
C13 C 0.1827(2) 0.04986(18) 0.34975(9) 0.0226(3) Uani 1 1 d . . .
H13 H 0.1077 0.1175 0.3564 0.027 Uiso 1 1 calc R . .
C7 C 0.2338(2) 0.11837(18) 0.51516(9) 0.0233(4) Uani 1 1 d . . .
H7 H 0.2407 0.0307 0.4850 0.028 Uiso 1 1 calc R . .
C12 C 0.1436(2) -0.08043(19) 0.30874(9) 0.0271(4) Uani 1 1 d . . .
H12 H 0.0425 -0.1010 0.2873 0.032 Uiso 1 1 calc R . .
C3 C 0.2827(2) 0.36124(18) 0.54370(9) 0.0227(3) Uani 1 1 d . . .
H3 H 0.3227 0.4411 0.5330 0.027 Uiso 1 1 calc R . .
C10 C 0.3990(2) -0.14975(18) 0.33018(9) 0.0274(4) Uani 1 1 d . . .
H10 H 0.4734 -0.2180 0.3235 0.033 Uiso 1 1 calc R . .
C11 C 0.2519(2) -0.18033(19) 0.29902(9) 0.0304(4) Uani 1 1 d . . .
H11 H 0.2251 -0.2693 0.2711 0.036 Uiso 1 1 calc R . .
C19 C 0.6177(2) 0.27040(19) 0.51292(9) 0.0242(4) Uani 1 1 d . . .
H19 H 0.5608 0.2684 0.5507 0.029 Uiso 1 1 calc R . .
C4 C 0.2152(2) 0.3722(2) 0.60496(9) 0.0276(4) Uani 1 1 d . . .
H4 H 0.2095 0.4594 0.6357 0.033 Uiso 1 1 calc R . .
C5 C 0.1563(2) 0.2568(2) 0.62112(9) 0.0298(4) Uani 1 1 d . . .
H5 H 0.1099 0.2647 0.6628 0.036 Uiso 1 1 calc R . .
C17 C 0.8605(2) 0.2943(2) 0.47034(11) 0.0347(5) Uani 1 1 d . . .
H17 H 0.9678 0.3096 0.4785 0.042 Uiso 1 1 calc R . .
C18 C 0.7754(2) 0.2924(2) 0.52479(11) 0.0336(4) Uani 1 1 d . . .
H18 H 0.8245 0.3062 0.5706 0.040 Uiso 1 1 calc R . .
C16 C 0.7873(2) 0.27364(19) 0.40330(11) 0.0301(4) Uani 1 1 d . . .
H16 H 0.8450 0.2738 0.3655 0.036 Uiso 1 1 calc R . .
C6 C 0.1652(2) 0.1299(2) 0.57643(10) 0.0301(4) Uani 1 1 d . . .
H6 H 0.1245 0.0505 0.5874 0.036 Uiso 1 1 calc R . .
H1 H 0.292(3) 0.404(2) 0.4200(11) 0.033(6) Uiso 1 1 d . . .
P2 P 0.72289(5) 0.51119(5) 0.18367(2) 0.02192(11) Uani 1 1 d . . .
Cl4 Cl 0.92387(5) 0.62221(5) 0.18308(2) 0.03226(12) Uani 1 1 d . . .
Cl3 Cl 0.58207(6) 0.67789(5) 0.18482(3) 0.03547(13) Uani 1 1 d . . .
N2 N 0.70437(17) 0.42631(15) 0.10191(8) 0.0224(3) Uani 1 1 d . . .
C21 C 0.6621(2) 0.20111(17) 0.12806(8) 0.0207(3) Uani 1 1 d . . .
C33 C 0.45783(19) 0.30046(17) 0.05662(9) 0.0208(3) Uani 1 1 d . . .
C20 C 0.63014(19) 0.28642(16) 0.07365(8) 0.0188(3) Uani 1 1 d . . .
C27 C 0.70652(18) 0.22350(17) 0.00744(8) 0.0200(3) Uani 1 1 d . . .
C32 C 0.7128(2) 0.29731(19) -0.04365(9) 0.0250(4) Uani 1 1 d . . .
H32 H 0.6720 0.3861 -0.0368 0.030 Uiso 1 1 calc R . .
C26 C 0.8108(2) 0.19858(18) 0.15988(9) 0.0260(4) Uani 1 1 d . . .
H26 H 0.8897 0.2531 0.1493 0.031 Uiso 1 1 calc R . .
C34 C 0.3728(2) 0.36728(19) 0.10944(10) 0.0293(4) Uani 1 1 d . . .
H34 H 0.4227 0.4039 0.1545 0.035 Uiso 1 1 calc R . .
C28 C 0.7662(2) 0.09331(18) -0.00426(9) 0.0265(4) Uani 1 1 d . . .
H28 H 0.7610 0.0405 0.0294 0.032 Uiso 1 1 calc R . .
C38 C 0.3815(2) 0.2468(2) -0.00861(10) 0.0284(4) Uani 1 1 d . . .
H38 H 0.4362 0.1987 -0.0450 0.034 Uiso 1 1 calc R . .
C22 C 0.5499(2) 0.11877(19) 0.14416(10) 0.0278(4) Uani 1 1 d . . .
H22 H 0.4488 0.1180 0.1228 0.033 Uiso 1 1 calc R . .
C31 C 0.7777(2) 0.2427(2) -0.10406(10) 0.0321(4) Uani 1 1 d . . .
H31 H 0.7805 0.2939 -0.1385 0.039 Uiso 1 1 calc R . .
C25 C 0.8438(2) 0.1170(2) 0.20676(10) 0.0342(5) Uani 1 1 d . . .
H25 H 0.9449 0.1162 0.2279 0.041 Uiso 1 1 calc R . .
C24 C 0.7304(3) 0.0372(2) 0.22280(11) 0.0377(5) Uani 1 1 d . . .
H24 H 0.7531 -0.0175 0.2553 0.045 Uiso 1 1 calc R . .
C29 C 0.8335(2) 0.0394(2) -0.06479(10) 0.0338(4) Uani 1 1 d . . .
H29 H 0.8759 -0.0487 -0.0717 0.041 Uiso 1 1 calc R . .
C23 C 0.5837(3) 0.0374(2) 0.19125(11) 0.0364(5) Uani 1 1 d . . .
H23 H 0.5056 -0.0181 0.2017 0.044 Uiso 1 1 calc R . .
C37 C 0.2248(2) 0.2628(2) -0.02126(12) 0.0396(5) Uani 1 1 d . . .
H37 H 0.1745 0.2274 -0.0664 0.048 Uiso 1 1 calc R . .
C35 C 0.2172(2) 0.3811(2) 0.09728(13) 0.0387(5) Uani 1 1 d . . .
H35 H 0.1613 0.4256 0.1340 0.046 Uiso 1 1 calc R . .
C36 C 0.1429(2) 0.3296(2) 0.03121(13) 0.0437(6) Uani 1 1 d . . .
H36 H 0.0366 0.3405 0.0224 0.052 Uiso 1 1 calc R . .
C30 C 0.8386(2) 0.1142(2) -0.11466(10) 0.0356(5) Uani 1 1 d . . .
H30 H 0.8838 0.0774 -0.1561 0.043 Uiso 1 1 calc R . .
H2 H 0.723(3) 0.468(2) 0.0723(12) 0.036(6) Uiso 1 1 d . . .
 
loop_
 _atom_site_aniso_label
 _atom_site_aniso_U_11
 _atom_site_aniso_U_22
 _atom_site_aniso_U_33
 _atom_site_aniso_U_23
 _atom_site_aniso_U_13
 _atom_site_aniso_U_12
P1 0.0280(2) 0.0198(2) 0.0198(2) 0.00543(16) 0.00033(17) -0.00099(18)
Cl1 0.0391(3) 0.0333(3) 0.0375(3) 0.0156(2) 0.0062(2) -0.0088(2)
Cl2 0.0286(3) 0.0547(3) 0.0481(3) 0.0273(3) -0.0065(2) 0.0057(2)
C8 0.0207(8) 0.0167(7) 0.0158(7) 0.0035(6) 0.0023(6) -0.0005(6)
C1 0.0157(7) 0.0153(7) 0.0193(7) 0.0047(6) 0.0009(6) 0.0021(6)
C2 0.0133(7) 0.0207(8) 0.0190(7) 0.0049(6) 0.0011(6) 0.0029(6)
N1 0.0270(8) 0.0142(7) 0.0201(7) 0.0035(5) 0.0021(6) 0.0047(6)
C14 0.0170(8) 0.0140(7) 0.0230(8) 0.0025(6) 0.0026(6) 0.0008(6)
C15 0.0217(9) 0.0234(8) 0.0266(9) 0.0058(7) 0.0048(7) 0.0019(7)
C9 0.0233(9) 0.0208(8) 0.0224(8) 0.0047(6) 0.0026(7) 0.0038(7)
C13 0.0203(8) 0.0223(8) 0.0263(8) 0.0087(7) 0.0004(7) -0.0006(7)
C7 0.0254(9) 0.0203(8) 0.0250(8) 0.0063(7) 0.0039(7) 0.0030(7)
C12 0.0302(10) 0.0258(9) 0.0244(9) 0.0076(7) -0.0042(7) -0.0085(7)
C3 0.0220(9) 0.0211(8) 0.0238(8) 0.0028(7) 0.0033(7) -0.0021(7)
C10 0.0363(10) 0.0193(8) 0.0267(9) 0.0044(7) 0.0063(8) 0.0052(7)
C11 0.0462(12) 0.0192(8) 0.0228(9) 0.0001(7) 0.0017(8) -0.0058(8)
C19 0.0203(8) 0.0272(9) 0.0239(8) 0.0037(7) 0.0007(7) 0.0037(7)
C4 0.0252(9) 0.0305(10) 0.0238(9) -0.0011(7) 0.0039(7) 0.0011(7)
C5 0.0277(10) 0.0404(11) 0.0225(9) 0.0075(8) 0.0086(7) 0.0003(8)
C17 0.0151(9) 0.0330(11) 0.0530(13) 0.0046(9) 0.0017(8) 0.0001(7)
C18 0.0244(10) 0.0370(11) 0.0351(10) 0.0036(8) -0.0067(8) 0.0003(8)
C16 0.0230(9) 0.0274(10) 0.0413(11) 0.0072(8) 0.0119(8) 0.0029(7)
C6 0.0321(10) 0.0326(10) 0.0297(9) 0.0139(8) 0.0072(8) -0.0030(8)
P2 0.0253(2) 0.0199(2) 0.0197(2) 0.00283(16) 0.00256(17) 0.00042(17)
Cl4 0.0241(2) 0.0321(2) 0.0358(3) 0.00072(19) -0.00196(18) -0.00601(18)
Cl3 0.0345(3) 0.0254(2) 0.0454(3) 0.0031(2) 0.0105(2) 0.00973(19)
N2 0.0277(8) 0.0189(7) 0.0202(7) 0.0042(6) 0.0023(6) -0.0037(6)
C21 0.0241(9) 0.0176(8) 0.0194(8) 0.0026(6) 0.0012(6) 0.0020(6)
C33 0.0188(8) 0.0184(8) 0.0268(8) 0.0090(7) 0.0012(6) 0.0003(6)
C20 0.0193(8) 0.0164(7) 0.0198(8) 0.0030(6) 0.0013(6) -0.0009(6)
C27 0.0165(8) 0.0225(8) 0.0193(8) 0.0023(6) 0.0004(6) -0.0001(6)
C32 0.0235(9) 0.0277(9) 0.0238(9) 0.0058(7) 0.0035(7) 0.0015(7)
C26 0.0255(9) 0.0230(9) 0.0285(9) 0.0053(7) -0.0003(7) 0.0021(7)
C34 0.0250(9) 0.0245(9) 0.0380(10) 0.0047(8) 0.0078(8) 0.0005(7)
C28 0.0282(10) 0.0234(9) 0.0262(9) 0.0030(7) 0.0019(7) 0.0006(7)
C38 0.0221(9) 0.0347(10) 0.0302(9) 0.0132(8) -0.0012(7) -0.0018(8)
C22 0.0285(10) 0.0244(9) 0.0313(9) 0.0092(7) 0.0011(8) -0.0017(7)
C31 0.0312(10) 0.0395(11) 0.0274(9) 0.0092(8) 0.0081(8) -0.0006(9)
C25 0.0384(11) 0.0284(10) 0.0329(10) 0.0060(8) -0.0082(8) 0.0064(9)
C24 0.0541(14) 0.0294(10) 0.0319(10) 0.0144(8) -0.0020(9) 0.0057(10)
C29 0.0328(11) 0.0310(10) 0.0340(10) -0.0004(8) 0.0041(8) 0.0072(8)
C23 0.0454(12) 0.0275(10) 0.0405(11) 0.0160(9) 0.0052(9) -0.0018(9)
C37 0.0241(10) 0.0529(14) 0.0461(12) 0.0254(10) -0.0083(9) -0.0065(9)
C35 0.0289(11) 0.0275(10) 0.0633(14) 0.0126(10) 0.0182(10) 0.0059(8)
C36 0.0169(10) 0.0485(13) 0.0760(17) 0.0357(12) 0.0034(10) 0.0052(9)
C30 0.0316(11) 0.0452(12) 0.0278(10) 0.0008(9) 0.0108(8) 0.0060(9)

#==============================================================================

# MOLECULAR GEOMETRY
 
_geom_special_details
;
 All s.u.'s (except the s.u. in the dihedral angle between two l.s. planes)
 are estimated using the full covariance matrix.  The cell s.u.'s are taken
 into account individually in the estimation of s.u.'s in distances, angles
 and torsion angles; correlations between s.u.'s in cell parameters are only
 used when they are defined by crystal symmetry.  An approximate (isotropic)
 treatment of cell s.u.'s is used for estimating s.u.'s involving l.s. planes.
;
 
loop_
 _geom_bond_atom_site_label_1
 _geom_bond_atom_site_label_2
 _geom_bond_distance
 _geom_bond_site_symmetry_2
 _geom_bond_publ_flag
P1 N1 1.6457(15) . ?
P1 Cl2 2.0818(7) . ?
P1 Cl1 2.0897(7) . ?
C8 C9 1.394(2) . ?
C8 C13 1.402(2) . ?
C8 C1 1.538(2) . ?
C1 N1 1.499(2) . ?
C1 C14 1.542(2) . ?
C1 C2 1.545(2) . ?
C2 C7 1.389(2) . ?
C2 C3 1.400(2) . ?
N1 H1 0.80(2) . ?
C14 C19 1.396(2) . ?
C14 C15 1.400(2) . ?
C15 C16 1.386(3) . ?
C15 H15 0.9500 . ?
C9 C10 1.394(2) . ?
C9 H9 0.9500 . ?
C13 C12 1.392(2) . ?
C13 H13 0.9500 . ?
C7 C6 1.397(2) . ?
C7 H7 0.9500 . ?
C12 C11 1.387(3) . ?
C12 H12 0.9500 . ?
C3 C4 1.393(2) . ?
C3 H3 0.9500 . ?
C10 C11 1.383(3) . ?
C10 H10 0.9500 . ?
C11 H11 0.9500 . ?
C19 C18 1.395(3) . ?
C19 H19 0.9500 . ?
C4 C5 1.382(3) . ?
C4 H4 0.9500 . ?
C5 C6 1.382(3) . ?
C5 H5 0.9500 . ?
C17 C18 1.383(3) . ?
C17 C16 1.395(3) . ?
C17 H17 0.9500 . ?
C18 H18 0.9500 . ?
C16 H16 0.9500 . ?
C6 H6 0.9500 . ?
P2 N2 1.6458(15) . ?
P2 Cl4 2.0880(7) . ?
P2 Cl3 2.0926(6) . ?
N2 C20 1.503(2) . ?
N2 H2 0.83(2) . ?
C21 C22 1.391(3) . ?
C21 C26 1.404(2) . ?
C21 C20 1.538(2) . ?
C33 C38 1.390(2) . ?
C33 C34 1.400(2) . ?
C33 C20 1.541(2) . ?
C20 C27 1.546(2) . ?
C27 C28 1.392(2) . ?
C27 C32 1.396(2) . ?
C32 C31 1.383(2) . ?
C32 H32 0.9500 . ?
C26 C25 1.391(3) . ?
C26 H26 0.9500 . ?
C34 C35 1.385(3) . ?
C34 H34 0.9500 . ?
C28 C29 1.395(3) . ?
C28 H28 0.9500 . ?
C38 C37 1.400(3) . ?
C38 H38 0.9500 . ?
C22 C23 1.394(3) . ?
C22 H22 0.9500 . ?
C31 C30 1.382(3) . ?
C31 H31 0.9500 . ?
C25 C24 1.383(3) . ?
C25 H25 0.9500 . ?
C24 C23 1.384(3) . ?
C24 H24 0.9500 . ?
C29 C30 1.381(3) . ?
C29 H29 0.9500 . ?
C23 H23 0.9500 . ?
C37 C36 1.378(3) . ?
C37 H37 0.9500 . ?
C35 C36 1.393(3) . ?
C35 H35 0.9500 . ?
C36 H36 0.9500 . ?
C30 H30 0.9500 . ?
 
loop_
 _geom_angle_atom_site_label_1
 _geom_angle_atom_site_label_2
 _geom_angle_atom_site_label_3
 _geom_angle
 _geom_angle_site_symmetry_1
 _geom_angle_site_symmetry_3
 _geom_angle_publ_flag
N1 P1 Cl2 99.20(6) . . ?
N1 P1 Cl1 103.32(6) . . ?
Cl2 P1 Cl1 95.42(3) . . ?
C9 C8 C13 118.36(15) . . ?
C9 C8 C1 121.86(14) . . ?
C13 C8 C1 119.60(14) . . ?
N1 C1 C8 107.89(12) . . ?
N1 C1 C14 109.68(13) . . ?
C8 C1 C14 111.20(12) . . ?
N1 C1 C2 107.14(12) . . ?
C8 C1 C2 109.52(13) . . ?
C14 C1 C2 111.27(13) . . ?
C7 C2 C3 118.41(15) . . ?
C7 C2 C1 121.94(14) . . ?
C3 C2 C1 119.64(15) . . ?
C1 N1 P1 124.69(11) . . ?
C1 N1 H1 117.0(16) . . ?
P1 N1 H1 115.4(16) . . ?
C19 C14 C15 117.82(16) . . ?
C19 C14 C1 122.74(15) . . ?
C15 C14 C1 119.40(14) . . ?
C16 C15 C14 121.33(17) . . ?
C16 C15 H15 119.3 . . ?
C14 C15 H15 119.3 . . ?
C10 C9 C8 120.68(16) . . ?
C10 C9 H9 119.7 . . ?
C8 C9 H9 119.7 . . ?
C12 C13 C8 120.68(16) . . ?
C12 C13 H13 119.7 . . ?
C8 C13 H13 119.7 . . ?
C2 C7 C6 120.82(16) . . ?
C2 C7 H7 119.6 . . ?
C6 C7 H7 119.6 . . ?
C11 C12 C13 120.21(17) . . ?
C11 C12 H12 119.9 . . ?
C13 C12 H12 119.9 . . ?
C4 C3 C2 120.61(16) . . ?
C4 C3 H3 119.7 . . ?
C2 C3 H3 119.7 . . ?
C11 C10 C9 120.41(17) . . ?
C11 C10 H10 119.8 . . ?
C9 C10 H10 119.8 . . ?
C10 C11 C12 119.66(17) . . ?
C10 C11 H11 120.2 . . ?
C12 C11 H11 120.2 . . ?
C18 C19 C14 120.97(17) . . ?
C18 C19 H19 119.5 . . ?
C14 C19 H19 119.5 . . ?
C5 C4 C3 120.24(17) . . ?
C5 C4 H4 119.9 . . ?
C3 C4 H4 119.9 . . ?
C4 C5 C6 119.84(17) . . ?
C4 C5 H5 120.1 . . ?
C6 C5 H5 120.1 . . ?
C18 C17 C16 119.37(18) . . ?
C18 C17 H17 120.3 . . ?
C16 C17 H17 120.3 . . ?
C17 C18 C19 120.41(18) . . ?
C17 C18 H18 119.8 . . ?
C19 C18 H18 119.8 . . ?
C15 C16 C17 120.10(18) . . ?
C15 C16 H16 120.0 . . ?
C17 C16 H16 120.0 . . ?
C5 C6 C7 120.08(17) . . ?
C5 C6 H6 120.0 . . ?
C7 C6 H6 120.0 . . ?
N2 P2 Cl4 98.38(6) . . ?
N2 P2 Cl3 103.91(6) . . ?
Cl4 P2 Cl3 94.79(3) . . ?
C20 N2 P2 126.08(12) . . ?
C20 N2 H2 115.0(16) . . ?
P2 N2 H2 118.0(16) . . ?
C22 C21 C26 118.13(16) . . ?
C22 C21 C20 122.12(16) . . ?
C26 C21 C20 119.63(15) . . ?
C38 C33 C34 118.08(17) . . ?
C38 C33 C20 123.03(15) . . ?
C34 C33 C20 118.87(15) . . ?
N2 C20 C21 108.45(13) . . ?
N2 C20 C33 109.43(13) . . ?
C21 C20 C33 111.39(13) . . ?
N2 C20 C27 105.82(13) . . ?
C21 C20 C27 110.43(13) . . ?
C33 C20 C27 111.12(13) . . ?
C28 C27 C32 118.27(15) . . ?
C28 C27 C20 122.30(15) . . ?
C32 C27 C20 119.41(15) . . ?
C31 C32 C27 120.79(17) . . ?
C31 C32 H32 119.6 . . ?
C27 C32 H32 119.6 . . ?
C25 C26 C21 120.62(18) . . ?
C25 C26 H26 119.7 . . ?
C21 C26 H26 119.7 . . ?
C35 C34 C33 121.30(19) . . ?
C35 C34 H34 119.4 . . ?
C33 C34 H34 119.4 . . ?
C27 C28 C29 120.76(18) . . ?
C27 C28 H28 119.6 . . ?
C29 C28 H28 119.6 . . ?
C33 C38 C37 120.65(19) . . ?
C33 C38 H38 119.7 . . ?
C37 C38 H38 119.7 . . ?
C21 C22 C23 120.98(18) . . ?
C21 C22 H22 119.5 . . ?
C23 C22 H22 119.5 . . ?
C30 C31 C32 120.44(19) . . ?
C30 C31 H31 119.8 . . ?
C32 C31 H31 119.8 . . ?
C24 C25 C26 120.45(19) . . ?
C24 C25 H25 119.8 . . ?
C26 C25 H25 119.8 . . ?
C25 C24 C23 119.59(19) . . ?
C25 C24 H24 120.2 . . ?
C23 C24 H24 120.2 . . ?
C30 C29 C28 120.03(18) . . ?
C30 C29 H29 120.0 . . ?
C28 C29 H29 120.0 . . ?
C24 C23 C22 120.23(19) . . ?
C24 C23 H23 119.9 . . ?
C22 C23 H23 119.9 . . ?
C36 C37 C38 120.5(2) . . ?
C36 C37 H37 119.7 . . ?
C38 C37 H37 119.7 . . ?
C34 C35 C36 119.94(19) . . ?
C34 C35 H35 120.0 . . ?
C36 C35 H35 120.0 . . ?
C37 C36 C35 119.49(19) . . ?
C37 C36 H36 120.3 . . ?
C35 C36 H36 120.3 . . ?
C29 C30 C31 119.70(18) . . ?
C29 C30 H30 120.1 . . ?
C31 C30 H30 120.1 . . ?
 
loop_
 _geom_torsion_atom_site_label_1
 _geom_torsion_atom_site_label_2
 _geom_torsion_atom_site_label_3
 _geom_torsion_atom_site_label_4
 _geom_torsion
 _geom_torsion_site_symmetry_1
 _geom_torsion_site_symmetry_2
 _geom_torsion_site_symmetry_3
 _geom_torsion_site_symmetry_4
 _geom_torsion_publ_flag
C9 C8 C1 N1 138.39(15) . . . . ?
C13 C8 C1 N1 -46.60(19) . . . . ?
C9 C8 C1 C14 18.1(2) . . . . ?
C13 C8 C1 C14 -166.91(14) . . . . ?
C9 C8 C1 C2 -105.31(17) . . . . ?
C13 C8 C1 C2 69.70(18) . . . . ?
N1 C1 C2 C7 131.49(16) . . . . ?
C8 C1 C2 C7 14.7(2) . . . . ?
C14 C1 C2 C7 -108.63(17) . . . . ?
N1 C1 C2 C3 -49.70(19) . . . . ?
C8 C1 C2 C3 -166.48(14) . . . . ?
C14 C1 C2 C3 70.17(18) . . . . ?
C8 C1 N1 P1 -36.65(18) . . . . ?
C14 C1 N1 P1 84.62(16) . . . . ?
C2 C1 N1 P1 -154.49(12) . . . . ?
Cl2 P1 N1 C1 147.23(13) . . . . ?
Cl1 P1 N1 C1 -114.92(13) . . . . ?
N1 C1 C14 C19 123.37(16) . . . . ?
C8 C1 C14 C19 -117.37(17) . . . . ?
C2 C1 C14 C19 5.0(2) . . . . ?
N1 C1 C14 C15 -58.79(18) . . . . ?
C8 C1 C14 C15 60.46(19) . . . . ?
C2 C1 C14 C15 -177.15(14) . . . . ?
C19 C14 C15 C16 -0.4(3) . . . . ?
C1 C14 C15 C16 -178.38(16) . . . . ?
C13 C8 C9 C10 0.6(2) . . . . ?
C1 C8 C9 C10 175.72(15) . . . . ?
C9 C8 C13 C12 -0.6(2) . . . . ?
C1 C8 C13 C12 -175.79(15) . . . . ?
C3 C2 C7 C6 1.0(3) . . . . ?
C1 C2 C7 C6 179.84(16) . . . . ?
C8 C13 C12 C11 0.4(3) . . . . ?
C7 C2 C3 C4 -0.6(2) . . . . ?
C1 C2 C3 C4 -179.41(15) . . . . ?
C8 C9 C10 C11 -0.4(3) . . . . ?
C9 C10 C11 C12 0.2(3) . . . . ?
C13 C12 C11 C10 -0.1(3) . . . . ?
C15 C14 C19 C18 0.9(3) . . . . ?
C1 C14 C19 C18 178.78(16) . . . . ?
C2 C3 C4 C5 -0.1(3) . . . . ?
C3 C4 C5 C6 0.3(3) . . . . ?
C16 C17 C18 C19 -0.2(3) . . . . ?
C14 C19 C18 C17 -0.6(3) . . . . ?
C14 C15 C16 C17 -0.3(3) . . . . ?
C18 C17 C16 C15 0.7(3) . . . . ?
C4 C5 C6 C7 0.2(3) . . . . ?
C2 C7 C6 C5 -0.8(3) . . . . ?
Cl4 P2 N2 C20 150.26(13) . . . . ?
Cl3 P2 N2 C20 -112.65(13) . . . . ?
P2 N2 C20 C21 -34.38(19) . . . . ?
P2 N2 C20 C33 87.32(16) . . . . ?
P2 N2 C20 C27 -152.87(12) . . . . ?
C22 C21 C20 N2 136.53(16) . . . . ?
C26 C21 C20 N2 -47.48(19) . . . . ?
C22 C21 C20 C33 16.0(2) . . . . ?
C26 C21 C20 C33 -167.96(15) . . . . ?
C22 C21 C20 C27 -107.94(18) . . . . ?
C26 C21 C20 C27 68.05(19) . . . . ?
C38 C33 C20 N2 123.99(17) . . . . ?
C34 C33 C20 N2 -57.63(19) . . . . ?
C38 C33 C20 C21 -116.10(18) . . . . ?
C34 C33 C20 C21 62.28(19) . . . . ?
C38 C33 C20 C27 7.5(2) . . . . ?
C34 C33 C20 C27 -174.13(15) . . . . ?
N2 C20 C27 C28 129.51(17) . . . . ?
C21 C20 C27 C28 12.3(2) . . . . ?
C33 C20 C27 C28 -111.79(18) . . . . ?
N2 C20 C27 C32 -52.30(19) . . . . ?
C21 C20 C27 C32 -169.47(15) . . . . ?
C33 C20 C27 C32 66.39(19) . . . . ?
C28 C27 C32 C31 -0.5(3) . . . . ?
C20 C27 C32 C31 -178.74(16) . . . . ?
C22 C21 C26 C25 -0.8(3) . . . . ?
C20 C21 C26 C25 -176.92(16) . . . . ?
C38 C33 C34 C35 -0.6(3) . . . . ?
C20 C33 C34 C35 -179.07(17) . . . . ?
C32 C27 C28 C29 1.4(3) . . . . ?
C20 C27 C28 C29 179.62(16) . . . . ?
C34 C33 C38 C37 1.8(3) . . . . ?
C20 C33 C38 C37 -179.85(17) . . . . ?
C26 C21 C22 C23 0.8(3) . . . . ?
C20 C21 C22 C23 176.89(16) . . . . ?
C27 C32 C31 C30 -0.5(3) . . . . ?
C21 C26 C25 C24 0.0(3) . . . . ?
C26 C25 C24 C23 0.8(3) . . . . ?
C27 C28 C29 C30 -1.4(3) . . . . ?
C25 C24 C23 C22 -0.7(3) . . . . ?
C21 C22 C23 C24 -0.1(3) . . . . ?
C33 C38 C37 C36 -1.4(3) . . . . ?
C33 C34 C35 C36 -0.9(3) . . . . ?
C38 C37 C36 C35 -0.2(3) . . . . ?
C34 C35 C36 C37 1.3(3) . . . . ?
C28 C29 C30 C31 0.5(3) . . . . ?
C32 C31 C30 C29 0.5(3) . . . . ?
 
_diffrn_measured_fraction_theta_max    0.978
_diffrn_reflns_theta_full              29.00
_diffrn_measured_fraction_theta_full   0.978
_refine_diff_density_max    0.605
_refine_diff_density_min   -0.313
_refine_diff_density_rms    0.068

#=============================================================================
 
data_av_aw114b_DippNHSiMe3

_audit_author_name                'Villinger, A.' 
_audit_creation_method            SHELXL-97 

#==============================================================================

# CHEMICAL DATA

_chemical_name_systematic
;
N-trimethylsilyl-2,6-diisopropylphenylaniline
;
_chemical_name_common             ?
_chemical_melting_point           ?
_chemical_formula_moiety          'C15 H27 N Si'
_chemical_formula_sum
 'C15 H27 N Si'
_chemical_formula_weight          249.47
 
loop_
 _atom_type_symbol
 _atom_type_description
 _atom_type_scat_dispersion_real
 _atom_type_scat_dispersion_imag
 _atom_type_scat_source
 'C'  'C'   0.0033   0.0016
 'International Tables Vol C Tables 4.2.6.8 and 6.1.1.4'
 'H'  'H'   0.0000   0.0000
 'International Tables Vol C Tables 4.2.6.8 and 6.1.1.4'
 'N'  'N'   0.0061   0.0033
 'International Tables Vol C Tables 4.2.6.8 and 6.1.1.4'
 'Si'  'Si'   0.0817   0.0704
 'International Tables Vol C Tables 4.2.6.8 and 6.1.1.4'
 
#==============================================================================

# CRYSTAL DATA
 
_symmetry_cell_setting            monoclinic
_symmetry_space_group_name_H-M    'P 21'
_symmetry_space_group_name_Hall   'P 2yb'
_symmetry_Int_Tables_number       4
 
loop_
 _symmetry_equiv_pos_as_xyz
 'x, y, z'
 '-x, y+1/2, -z'
 
_cell_length_a                    6.3588(10)
_cell_length_b                    17.939(3)
_cell_length_c                    28.954(5)
_cell_angle_alpha                 90.00
_cell_angle_beta                  95.088(7)
_cell_angle_gamma                 90.00
_cell_volume                      3289.7(9)
_cell_formula_units_Z             8
_cell_measurement_temperature     173(2)
_cell_measurement_reflns_used     4049
_cell_measurement_theta_min       4.807
_cell_measurement_theta_max       43.969
 
_exptl_crystal_description        needle
_exptl_crystal_colour             colourless
_exptl_crystal_size_max           1.00
_exptl_crystal_size_mid           0.32
_exptl_crystal_size_min           0.08
_exptl_crystal_density_meas       ?
_exptl_crystal_density_diffrn     1.007
_exptl_crystal_density_method     'not measured'
_exptl_crystal_F_000              1104
_exptl_absorpt_coefficient_mu     0.126
_exptl_absorpt_correction_type    multi-scan
_exptl_absorpt_correction_T_min   0.8842
_exptl_absorpt_correction_T_max   0.9900
_exptl_absorpt_process_details    '(SADABS; Sheldrick, 2004)'

#==============================================================================

# EXPERIMENTAL DATA
 
_exptl_special_details
;
 ?
;
 
_diffrn_ambient_temperature       173(2)
_diffrn_radiation_wavelength      0.71073
_diffrn_radiation_type            MoK\a
_diffrn_radiation_source          'sealed tube'
_diffrn_radiation_monochromator   graphite
_diffrn_measurement_device_type   'Bruker Apex Kappa II-CCD-diffractometer'
_diffrn_measurement_method        'phi and omega scans'
_diffrn_detector_area_resol_mean  ?
_diffrn_standards_number          ?
_diffrn_standards_interval_count  ?
_diffrn_standards_interval_time   ?
_diffrn_standards_decay_%         ?
_diffrn_reflns_number             30339
_diffrn_reflns_av_R_equivalents   0.0750
_diffrn_reflns_av_sigmaI/netI     0.1016
_diffrn_reflns_limit_h_min        -6
_diffrn_reflns_limit_h_max        7
_diffrn_reflns_limit_k_min        -20
_diffrn_reflns_limit_k_max        20
_diffrn_reflns_limit_l_min        -33
_diffrn_reflns_limit_l_max        33
_diffrn_reflns_theta_min          0.71
_diffrn_reflns_theta_max          24.00
_reflns_number_total              10003
_reflns_number_gt                 6845
_reflns_threshold_expression      >2\s(I)
 
_computing_data_collection        'Bruker Apex V7.51A'
_computing_cell_refinement        'Bruker Apex V7.51A'
_computing_data_reduction         'Bruker SAINT'
_computing_structure_solution     'SHELXS-97 (Sheldrick, 1997)'
_computing_structure_refinement   'SHELXL-97 (Sheldrick, 1997)'
_computing_molecular_graphics     'ORTEP-3v2.01 (Farrugia, 1997)' 
_computing_publication_material   'SHELXL-97'

#==============================================================================

# REFINEMENT DATA 

_refine_special_details
;
 All H atoms (except H1a/H2a/H3a/H4a) were positioned geometrically and refined 
 using a riding model, with C---H = 0.98 (methyl groups), 0.99\%A 
 (methylene groups), 1.00\%A (methine groups) or 0.95 \%A (aryl CH) and with 
 <i>U</i>~iso~(H) = 1.5 times <i>U</i>~eq~(C) (methyl groups) or with 
 <i>U</i>~iso~(H) = 1.2 times <i>U</i>~eq~(C) (methylene  groups, aryl CH, 
 methine groups). Torsion angles of all methyl groups were allowed to refine.
 
 Refinement of F^2^ against ALL reflections.  The weighted R-factor wR and
 goodness of fit S are based on F^2^, conventional R-factors R are based
 on F, with F set to zero for negative F^2^. The threshold expression of
 F^2^ > 2\s(F^2^) is used only for calculating R-factors(gt) etc. and is
 not relevant to the choice of reflections for refinement.  R-factors based
 on F^2^ are statistically about twice as large as those based on F, and R-
 factors based on ALL data will be even larger.
;
 
_refine_ls_structure_factor_coef  Fsqd
_refine_ls_matrix_type            full
_refine_ls_weighting_scheme       calc
_refine_ls_weighting_details
 'calc w=1/[\s^2^(Fo^2^)+(0.0743P)^2^+0.0000P] where P=(Fo^2^+2Fc^2^)/3'
_atom_sites_solution_primary      direct
_atom_sites_solution_secondary    difmap
_atom_sites_solution_hydrogens    geom
_refine_ls_hydrogen_treatment     mixed
_refine_ls_extinction_method      none
_refine_ls_extinction_coef        ?
_refine_ls_abs_structure_details
 'Flack H D (1983), Acta Cryst. A39, 876-881'
_refine_ls_abs_structure_Flack    0.53(14)
_refine_ls_number_reflns          10003
_refine_ls_number_parameters      656
_refine_ls_number_restraints      10
_refine_ls_R_factor_all           0.1067
_refine_ls_R_factor_gt            0.0646
_refine_ls_wR_factor_ref          0.1535
_refine_ls_wR_factor_gt           0.1405
_refine_ls_goodness_of_fit_ref    1.031
_refine_ls_restrained_S_all       1.031
_refine_ls_shift/su_max           0.000
_refine_ls_shift/su_mean          0.000

#==============================================================================

# ATOMIC COORDINATES AND DISPLACEMENT PARAMETERS
 
loop_
 _atom_site_label
 _atom_site_type_symbol
 _atom_site_fract_x
 _atom_site_fract_y
 _atom_site_fract_z
 _atom_site_U_iso_or_equiv
 _atom_site_adp_type
 _atom_site_occupancy
 _atom_site_symmetry_multiplicity
 _atom_site_calc_flag
 _atom_site_refinement_flags
 _atom_site_disorder_assembly
 _atom_site_disorder_group
H1A H 0.618(7) 0.430(3) 0.2500(18) 0.08(2) Uiso 1 1 d D . .
Si1 Si 0.6666(2) 0.50871(7) 0.19586(4) 0.0432(4) Uani 1 1 d . . .
N1 N 0.7311(7) 0.4434(2) 0.23885(13) 0.0390(10) Uani 1 1 d D . .
C1 C 0.9334(8) 0.4209(3) 0.25807(15) 0.0387(12) Uani 1 1 d . . .
C2 C 1.0330(8) 0.3590(2) 0.23901(14) 0.0372(12) Uani 1 1 d . . .
C3 C 1.2261(8) 0.3363(3) 0.25959(16) 0.0450(12) Uani 1 1 d . . .
H3 H 1.2943 0.2951 0.2467 0.054 Uiso 1 1 calc R . .
C4 C 1.3243(8) 0.3712(3) 0.29823(16) 0.0486(14) Uani 1 1 d . . .
H4 H 1.4559 0.3538 0.3122 0.058 Uiso 1 1 calc R . .
C5 C 1.2249(9) 0.4326(3) 0.31607(16) 0.0503(14) Uani 1 1 d . . .
H5 H 1.2921 0.4578 0.3422 0.060 Uiso 1 1 calc R . .
C6 C 1.0319(9) 0.4579(3) 0.29694(16) 0.0475(13) Uani 1 1 d . . .
C7 C 0.9259(8) 0.3183(3) 0.19677(15) 0.0457(13) Uani 1 1 d . . .
H7 H 0.8356 0.3549 0.1781 0.055 Uiso 1 1 calc R . .
C8 C 0.7837(10) 0.2569(3) 0.2128(2) 0.0685(17) Uani 1 1 d . . .
H8A H 0.8681 0.2220 0.2329 0.103 Uiso 1 1 calc R . .
H8B H 0.7179 0.2301 0.1858 0.103 Uiso 1 1 calc R . .
H8C H 0.6736 0.2790 0.2301 0.103 Uiso 1 1 calc R . .
C9 C 1.0810(10) 0.2841(3) 0.16547(18) 0.0654(16) Uani 1 1 d . . .
H9A H 1.1764 0.3229 0.1558 0.098 Uiso 1 1 calc R . .
H9B H 1.0028 0.2623 0.1380 0.098 Uiso 1 1 calc R . .
H9C H 1.1634 0.2451 0.1825 0.098 Uiso 1 1 calc R . .
C10 C 0.9301(10) 0.5234(3) 0.31918(18) 0.0631(16) Uani 1 1 d . . .
H10 H 0.8056 0.5391 0.2979 0.076 Uiso 1 1 calc R . .
C11 C 0.8463(12) 0.4991(4) 0.3659(2) 0.098(2) Uani 1 1 d . . .
H11A H 0.9653 0.4843 0.3878 0.147 Uiso 1 1 calc R . .
H11B H 0.7494 0.4569 0.3605 0.147 Uiso 1 1 calc R . .
H11C H 0.7714 0.5409 0.3789 0.147 Uiso 1 1 calc R . .
C12 C 1.0726(12) 0.5897(3) 0.3267(2) 0.081(2) Uani 1 1 d . . .
H12A H 1.1977 0.5758 0.3471 0.121 Uiso 1 1 calc R . .
H12B H 0.9970 0.6299 0.3411 0.121 Uiso 1 1 calc R . .
H12C H 1.1161 0.6068 0.2969 0.121 Uiso 1 1 calc R . .
C13 C 0.5230(11) 0.5897(3) 0.2190(2) 0.084(2) Uani 1 1 d . . .
H13A H 0.4023 0.5715 0.2345 0.126 Uiso 1 1 calc R . .
H13B H 0.4728 0.6226 0.1933 0.126 Uiso 1 1 calc R . .
H13C H 0.6188 0.6173 0.2412 0.126 Uiso 1 1 calc R . .
C14 C 0.4859(9) 0.4662(3) 0.14945(17) 0.0636(16) Uani 1 1 d . . .
H14A H 0.5593 0.4260 0.1345 0.095 Uiso 1 1 calc R . .
H14B H 0.4408 0.5042 0.1264 0.095 Uiso 1 1 calc R . .
H14C H 0.3619 0.4459 0.1629 0.095 Uiso 1 1 calc R . .
C15 C 0.9167(9) 0.5396(4) 0.1739(2) 0.0745(18) Uani 1 1 d . . .
H15A H 1.0121 0.5582 0.1998 0.112 Uiso 1 1 calc R . .
H15B H 0.8876 0.5794 0.1511 0.112 Uiso 1 1 calc R . .
H15C H 0.9829 0.4974 0.1593 0.112 Uiso 1 1 calc R . .
H2A H 0.099(6) 0.897(3) 0.2761(15) 0.049(16) Uiso 1 1 d D . .
Si2 Si 0.1254(2) 0.84096(8) 0.21013(4) 0.0444(4) Uani 1 1 d . . .
N2 N 0.2030(7) 0.8868(2) 0.26097(13) 0.0367(9) Uani 1 1 d D A .
C16 C 0.4051(8) 0.9086(3) 0.28030(14) 0.0358(11) Uani 1 1 d . . .
C17 C 0.4884(7) 0.9786(2) 0.26772(13) 0.0332(11) Uani 1 1 d . A .
C18 C 0.6835(8) 1.0000(3) 0.28949(14) 0.0412(12) Uani 1 1 d . . .
H18 H 0.7436 1.0460 0.2811 0.049 Uiso 1 1 calc R A .
C19 C 0.7899(8) 0.9570(3) 0.32234(15) 0.0448(13) Uani 1 1 d . A .
H19 H 0.9197 0.9743 0.3373 0.054 Uiso 1 1 calc R . .
C20 C 0.7130(8) 0.8892(3) 0.33411(15) 0.0435(12) Uani 1 1 d . . .
H20 H 0.7909 0.8592 0.3566 0.052 Uiso 1 1 calc R A .
C21 C 0.5189(7) 0.8639(2) 0.31295(14) 0.0357(11) Uani 1 1 d . A .
C22 C 0.3717(8) 1.0287(3) 0.23239(15) 0.0440(13) Uani 1 1 d . . .
H22 H 0.2681 0.9969 0.2133 0.053 Uiso 1 1 calc R A .
C23 C 0.5102(11) 1.0650(4) 0.1996(2) 0.080(2) Uani 1 1 d . A .
H23A H 0.6032 1.1012 0.2166 0.120 Uiso 1 1 calc R . .
H23B H 0.4222 1.0906 0.1751 0.120 Uiso 1 1 calc R . .
H23C H 0.5958 1.0269 0.1859 0.120 Uiso 1 1 calc R . .
C24 C 0.2468(12) 1.0865(4) 0.2560(2) 0.094(2) Uani 1 1 d . A .
H24A H 0.3426 1.1248 0.2697 0.141 Uiso 1 1 calc R . .
H24B H 0.1728 1.0627 0.2804 0.141 Uiso 1 1 calc R . .
H24C H 0.1436 1.1095 0.2332 0.141 Uiso 1 1 calc R . .
C25 C 0.4316(9) 0.7895(3) 0.32720(15) 0.0450(13) Uani 1 1 d . . .
H25 H 0.3344 0.7708 0.3007 0.054 Uiso 1 1 calc R A .
C26 C 0.3034(10) 0.7982(3) 0.36855(18) 0.0678(17) Uani 1 1 d . A .
H26A H 0.3955 0.8154 0.3954 0.102 Uiso 1 1 calc R . .
H26B H 0.2413 0.7500 0.3758 0.102 Uiso 1 1 calc R . .
H26C H 0.1907 0.8346 0.3613 0.102 Uiso 1 1 calc R . .
C27 C 0.6013(11) 0.7297(3) 0.3383(2) 0.079(2) Uani 1 1 d . A .
H27A H 0.6873 0.7246 0.3120 0.119 Uiso 1 1 calc R . .
H27B H 0.5333 0.6819 0.3440 0.119 Uiso 1 1 calc R . .
H27C H 0.6916 0.7444 0.3660 0.119 Uiso 1 1 calc R . .
C28A C 0.0139(18) 0.7499(5) 0.2190(4) 0.0612(15) Uani 0.648(10) 1 d PD A 1
H28A H 0.1276 0.7146 0.2282 0.092 Uiso 0.648(10) 1 calc PR A 1
H28B H -0.0634 0.7329 0.1901 0.092 Uiso 0.648(10) 1 calc PR A 1
H28C H -0.0829 0.7528 0.2434 0.092 Uiso 0.648(10) 1 calc PR A 1
C29A C -0.0967(17) 0.9027(5) 0.1807(4) 0.0612(15) Uani 0.648(10) 1 d PD A 1
H29A H -0.2012 0.9131 0.2028 0.092 Uiso 0.648(10) 1 calc PR A 1
H29B H -0.1650 0.8766 0.1537 0.092 Uiso 0.648(10) 1 calc PR A 1
H29C H -0.0364 0.9497 0.1707 0.092 Uiso 0.648(10) 1 calc PR A 1
C30A C 0.3450(14) 0.8348(6) 0.1734(3) 0.0612(15) Uani 0.648(10) 1 d PD A 1
H30A H 0.3890 0.8851 0.1652 0.092 Uiso 0.648(10) 1 calc PR A 1
H30B H 0.2996 0.8071 0.1450 0.092 Uiso 0.648(10) 1 calc PR A 1
H30C H 0.4639 0.8089 0.1902 0.092 Uiso 0.648(10) 1 calc PR A 1
C28B C -0.060(3) 0.7622(11) 0.2287(6) 0.0612(15) Uani 0.352(10) 1 d PD A 2
H28D H 0.0127 0.7337 0.2543 0.092 Uiso 0.352(10) 1 calc PR A 2
H28E H -0.0955 0.7289 0.2023 0.092 Uiso 0.352(10) 1 calc PR A 2
H28F H -0.1888 0.7842 0.2388 0.092 Uiso 0.352(10) 1 calc PR A 2
C29B C -0.017(3) 0.8933(10) 0.1661(6) 0.0612(15) Uani 0.352(10) 1 d PD A 2
H29D H -0.1396 0.9166 0.1786 0.092 Uiso 0.352(10) 1 calc PR A 2
H29E H -0.0654 0.8602 0.1403 0.092 Uiso 0.352(10) 1 calc PR A 2
H29F H 0.0743 0.9321 0.1549 0.092 Uiso 0.352(10) 1 calc PR A 2
C30B C 0.372(3) 0.7945(11) 0.1897(6) 0.0612(15) Uani 0.352(10) 1 d PD A 2
H30D H 0.4453 0.7665 0.2154 0.092 Uiso 0.352(10) 1 calc PR A 2
H30E H 0.4669 0.8329 0.1791 0.092 Uiso 0.352(10) 1 calc PR A 2
H30F H 0.3310 0.7604 0.1640 0.092 Uiso 0.352(10) 1 calc PR A 2
H3A H 0.372(6) 0.583(3) 0.5511(19) 0.08(2) Uiso 1 1 d D . .
Si3 Si 0.2839(2) 0.64514(8) 0.49285(4) 0.0453(4) Uani 1 1 d . . .
N3 N 0.2452(7) 0.5938(2) 0.54175(13) 0.0397(10) Uani 1 1 d D . .
C31 C 0.0544(7) 0.5767(3) 0.56201(13) 0.0335(11) Uani 1 1 d . . .
C32 C -0.0513(7) 0.5097(3) 0.55012(14) 0.0385(11) Uani 1 1 d . . .
C33 C -0.2275(8) 0.4927(3) 0.57347(16) 0.0510(14) Uani 1 1 d . . .
H33 H -0.3029 0.4480 0.5657 0.061 Uiso 1 1 calc R . .
C34 C -0.2965(9) 0.5378(3) 0.60722(17) 0.0523(14) Uani 1 1 d . . .
H34 H -0.4121 0.5231 0.6238 0.063 Uiso 1 1 calc R . .
C35 C -0.1965(9) 0.6042(3) 0.61672(16) 0.0553(15) Uani 1 1 d . . .
H35 H -0.2495 0.6368 0.6388 0.066 Uiso 1 1 calc R . .
C36 C -0.0206(8) 0.6255(3) 0.59506(14) 0.0424(12) Uani 1 1 d . . .
C37 C 0.0232(9) 0.4580(3) 0.51448(15) 0.0541(14) Uani 1 1 d . . .
H37 H 0.0926 0.4891 0.4915 0.065 Uiso 1 1 calc R . .
C38 C 0.1893(11) 0.4038(4) 0.5362(2) 0.085(2) Uani 1 1 d . . .
H38A H 0.2976 0.4315 0.5553 0.128 Uiso 1 1 calc R . .
H38B H 0.2549 0.3772 0.5116 0.128 Uiso 1 1 calc R . .
H38C H 0.1218 0.3678 0.5556 0.128 Uiso 1 1 calc R . .
C39 C -0.1542(12) 0.4132(4) 0.4874(2) 0.094(2) Uani 1 1 d . . .
H39A H -0.2234 0.3811 0.5089 0.142 Uiso 1 1 calc R . .
H39B H -0.0940 0.3824 0.4640 0.142 Uiso 1 1 calc R . .
H39C H -0.2580 0.4477 0.4722 0.142 Uiso 1 1 calc R . .
C40 C 0.0875(10) 0.6987(3) 0.60804(18) 0.0614(16) Uani 1 1 d . . .
H40 H 0.1727 0.7127 0.5819 0.074 Uiso 1 1 calc R . .
C41 C -0.0619(15) 0.7628(4) 0.6147(3) 0.115(3) Uani 1 1 d . . .
H41A H -0.1264 0.7561 0.6440 0.173 Uiso 1 1 calc R . .
H41B H -0.1727 0.7638 0.5889 0.173 Uiso 1 1 calc R . .
H41C H 0.0165 0.8098 0.6156 0.173 Uiso 1 1 calc R . .
C42 C 0.2397(13) 0.6897(4) 0.6507(3) 0.106(3) Uani 1 1 d . . .
H42A H 0.3002 0.7383 0.6598 0.159 Uiso 1 1 calc R . .
H42B H 0.3530 0.6554 0.6439 0.159 Uiso 1 1 calc R . .
H42C H 0.1646 0.6695 0.6760 0.159 Uiso 1 1 calc R . .
C43 C 0.4599(11) 0.7253(3) 0.5080(2) 0.0768(19) Uani 1 1 d . . .
H43A H 0.3954 0.7575 0.5302 0.115 Uiso 1 1 calc R . .
H43B H 0.4811 0.7538 0.4799 0.115 Uiso 1 1 calc R . .
H43C H 0.5964 0.7071 0.5219 0.115 Uiso 1 1 calc R . .
C44 C 0.4225(10) 0.5880(4) 0.45258(18) 0.0708(17) Uani 1 1 d . . .
H44A H 0.5329 0.5588 0.4700 0.106 Uiso 1 1 calc R . .
H44B H 0.4867 0.6205 0.4305 0.106 Uiso 1 1 calc R . .
H44C H 0.3218 0.5542 0.4357 0.106 Uiso 1 1 calc R . .
C45 C 0.0221(8) 0.6750(4) 0.46600(18) 0.0699(18) Uani 1 1 d . . .
H45A H -0.0668 0.6311 0.4591 0.105 Uiso 1 1 calc R . .
H45B H 0.0398 0.7021 0.4372 0.105 Uiso 1 1 calc R . .
H45C H -0.0453 0.7076 0.4875 0.105 Uiso 1 1 calc R . .
H4A H -0.204(6) 0.705(4) 0.974(2) 0.12(3) Uiso 1 1 d D . .
Si4 Si -0.1169(2) 0.68508(9) 1.04271(4) 0.0473(4) Uani 1 1 d . . .
N4 N -0.0790(7) 0.7056(2) 0.98598(12) 0.0372(10) Uani 1 1 d D . .
C46 C 0.1072(7) 0.7208(2) 0.96466(14) 0.0333(11) Uani 1 1 d . . .
C47 C 0.1935(8) 0.7944(3) 0.96584(15) 0.0450(13) Uani 1 1 d . . .
C48 C 0.3723(9) 0.8066(3) 0.94244(17) 0.0556(15) Uani 1 1 d . . .
H48 H 0.4324 0.8551 0.9429 0.067 Uiso 1 1 calc R . .
C49 C 0.4636(9) 0.7519(3) 0.91906(16) 0.0536(14) Uani 1 1 d . . .
H49 H 0.5845 0.7624 0.9032 0.064 Uiso 1 1 calc R . .
C50 C 0.3803(8) 0.6800(3) 0.91830(15) 0.0471(13) Uani 1 1 d . . .
H50 H 0.4448 0.6418 0.9017 0.056 Uiso 1 1 calc R . .
C51 C 0.2054(7) 0.6637(3) 0.94132(14) 0.0368(11) Uani 1 1 d . . .
C52 C 0.0897(10) 0.8573(3) 0.98899(18) 0.0617(16) Uani 1 1 d . . .
H52 H -0.0191 0.8352 1.0078 0.074 Uiso 1 1 calc R . .
C53 C -0.0251(10) 0.9092(3) 0.9534(2) 0.080(2) Uani 1 1 d . . .
H53A H 0.0772 0.9318 0.9342 0.119 Uiso 1 1 calc R . .
H53B H -0.0973 0.9484 0.9694 0.119 Uiso 1 1 calc R . .
H53C H -0.1291 0.8806 0.9336 0.119 Uiso 1 1 calc R . .
C54 C 0.2415(13) 0.9015(4) 1.0220(2) 0.104(3) Uani 1 1 d . . .
H54A H 0.3107 0.8678 1.0452 0.157 Uiso 1 1 calc R . .
H54B H 0.1633 0.9398 1.0374 0.157 Uiso 1 1 calc R . .
H54C H 0.3483 0.9252 1.0045 0.157 Uiso 1 1 calc R . .
C55 C 0.1083(8) 0.5866(3) 0.93799(15) 0.0444(12) Uani 1 1 d . . .
H55 H 0.0330 0.5785 0.9665 0.053 Uiso 1 1 calc R . .
C56 C -0.0560(9) 0.5816(3) 0.89612(18) 0.0601(15) Uani 1 1 d . . .
H56A H 0.0139 0.5880 0.8675 0.090 Uiso 1 1 calc R . .
H56B H -0.1617 0.6210 0.8982 0.090 Uiso 1 1 calc R . .
H56C H -0.1253 0.5328 0.8958 0.090 Uiso 1 1 calc R . .
C57 C 0.2709(10) 0.5236(3) 0.9358(2) 0.0673(17) Uani 1 1 d . . .
H57A H 0.3421 0.5284 0.9072 0.101 Uiso 1 1 calc R . .
H57B H 0.1989 0.4753 0.9359 0.101 Uiso 1 1 calc R . .
H57C H 0.3754 0.5269 0.9627 0.101 Uiso 1 1 calc R . .
C58 C -0.3003(9) 0.6043(3) 1.04167(18) 0.0654(16) Uani 1 1 d . . .
H58A H -0.4301 0.6163 1.0223 0.098 Uiso 1 1 calc R . .
H58B H -0.3344 0.5933 1.0733 0.098 Uiso 1 1 calc R . .
H58C H -0.2329 0.5607 1.0289 0.098 Uiso 1 1 calc R . .
C59 C -0.2467(14) 0.7618(4) 1.0717(2) 0.113(3) Uani 1 1 d . . .
H59A H -0.1441 0.8017 1.0795 0.169 Uiso 1 1 calc R . .
H59B H -0.3012 0.7432 1.1001 0.169 Uiso 1 1 calc R . .
H59C H -0.3637 0.7814 1.0509 0.169 Uiso 1 1 calc R . .
C60 C 0.1438(9) 0.6638(6) 1.0727(2) 0.113(3) Uani 1 1 d . . .
H60A H 0.2004 0.6185 1.0595 0.170 Uiso 1 1 calc R . .
H60B H 0.1295 0.6560 1.1058 0.170 Uiso 1 1 calc R . .
H60C H 0.2402 0.7055 1.0689 0.170 Uiso 1 1 calc R . .
 
loop_
 _atom_site_aniso_label
 _atom_site_aniso_U_11
 _atom_site_aniso_U_22
 _atom_site_aniso_U_33
 _atom_site_aniso_U_23
 _atom_site_aniso_U_13
 _atom_site_aniso_U_12
Si1 0.0342(8) 0.0419(8) 0.0538(8) 0.0040(6) 0.0052(7) 0.0006(7)
N1 0.031(3) 0.044(2) 0.044(2) 0.0008(18) 0.010(2) 0.001(2)
C1 0.037(3) 0.040(3) 0.041(3) 0.002(2) 0.013(2) -0.002(2)
C2 0.038(3) 0.038(3) 0.037(2) 0.004(2) 0.014(2) -0.005(2)
C3 0.045(3) 0.043(3) 0.049(3) 0.000(2) 0.017(3) 0.004(3)
C4 0.038(3) 0.058(4) 0.050(3) 0.014(3) 0.003(3) 0.003(3)
C5 0.050(4) 0.057(3) 0.043(3) -0.006(2) -0.004(3) 0.008(3)
C6 0.053(4) 0.045(3) 0.045(3) -0.007(2) 0.006(3) 0.007(3)
C7 0.053(3) 0.043(3) 0.041(2) -0.002(2) 0.006(3) -0.002(3)
C8 0.069(4) 0.067(4) 0.071(3) -0.008(3) 0.020(3) -0.010(3)
C9 0.076(4) 0.058(4) 0.065(3) -0.019(3) 0.023(3) -0.010(3)
C10 0.065(4) 0.059(4) 0.062(3) -0.018(3) -0.010(3) 0.022(3)
C11 0.103(6) 0.099(5) 0.099(5) -0.036(4) 0.047(4) -0.008(5)
C12 0.123(6) 0.041(3) 0.081(4) -0.015(3) 0.019(4) 0.004(4)
C13 0.071(5) 0.057(4) 0.121(5) -0.019(4) -0.011(4) 0.022(4)
C14 0.060(4) 0.067(4) 0.061(3) 0.002(3) -0.009(3) 0.002(3)
C15 0.053(4) 0.093(5) 0.078(4) 0.043(3) 0.005(3) -0.003(4)
Si2 0.0454(9) 0.0440(8) 0.0429(7) -0.0074(6) -0.0008(6) -0.0085(7)
N2 0.029(3) 0.042(2) 0.040(2) 0.0013(19) 0.008(2) -0.007(2)
C16 0.035(3) 0.042(3) 0.031(2) -0.001(2) 0.008(2) -0.003(2)
C17 0.038(3) 0.034(2) 0.027(2) -0.0008(19) 0.002(2) 0.000(2)
C18 0.048(3) 0.039(3) 0.036(2) -0.005(2) 0.004(2) -0.010(3)
C19 0.033(3) 0.061(3) 0.040(2) -0.013(3) -0.001(2) -0.004(3)
C20 0.051(4) 0.043(3) 0.037(2) 0.006(2) 0.008(2) 0.008(3)
C21 0.034(3) 0.041(3) 0.033(2) -0.002(2) 0.004(2) -0.004(2)
C22 0.053(3) 0.032(3) 0.045(3) 0.006(2) -0.006(3) -0.013(3)
C23 0.081(5) 0.088(5) 0.073(4) 0.037(4) 0.019(4) 0.006(4)
C24 0.107(6) 0.109(6) 0.067(4) 0.021(4) 0.019(4) 0.055(5)
C25 0.060(4) 0.035(3) 0.040(2) 0.005(2) 0.007(2) 0.000(3)
C26 0.086(5) 0.054(3) 0.069(3) 0.009(3) 0.035(3) -0.003(3)
C27 0.105(6) 0.054(4) 0.082(4) 0.013(3) 0.027(4) 0.028(4)
C28A 0.059(4) 0.060(3) 0.063(3) -0.014(2) -0.003(3) -0.005(3)
C29A 0.059(4) 0.060(3) 0.063(3) -0.014(2) -0.003(3) -0.005(3)
C30A 0.059(4) 0.060(3) 0.063(3) -0.014(2) -0.003(3) -0.005(3)
C28B 0.059(4) 0.060(3) 0.063(3) -0.014(2) -0.003(3) -0.005(3)
C29B 0.059(4) 0.060(3) 0.063(3) -0.014(2) -0.003(3) -0.005(3)
C30B 0.059(4) 0.060(3) 0.063(3) -0.014(2) -0.003(3) -0.005(3)
Si3 0.0354(8) 0.0551(9) 0.0468(7) 0.0168(7) 0.0118(6) 0.0034(7)
N3 0.030(3) 0.048(2) 0.042(2) 0.0079(19) 0.005(2) 0.001(2)
C31 0.031(3) 0.038(3) 0.033(2) 0.006(2) 0.006(2) 0.003(2)
C32 0.037(3) 0.043(3) 0.035(2) 0.011(2) -0.001(2) 0.001(3)
C33 0.046(3) 0.058(3) 0.046(3) 0.018(3) -0.009(3) -0.013(3)
C34 0.043(3) 0.066(4) 0.050(3) 0.024(3) 0.015(3) 0.007(3)
C35 0.064(4) 0.062(4) 0.043(3) 0.011(3) 0.018(3) 0.013(3)
C36 0.051(3) 0.042(3) 0.035(2) 0.005(2) 0.008(2) 0.010(3)
C37 0.083(4) 0.038(3) 0.041(3) -0.006(2) 0.004(3) -0.002(3)
C38 0.087(5) 0.082(5) 0.085(4) -0.018(4) -0.004(4) 0.028(4)
C39 0.116(6) 0.085(5) 0.077(4) -0.022(4) -0.026(4) -0.001(5)
C40 0.087(5) 0.049(4) 0.051(3) -0.010(3) 0.024(3) -0.014(3)
C41 0.167(9) 0.053(4) 0.122(6) -0.005(4) -0.006(6) 0.025(5)
C42 0.116(6) 0.053(4) 0.143(7) -0.008(4) -0.025(6) -0.017(4)
C43 0.075(5) 0.058(4) 0.100(4) 0.017(3) 0.021(4) -0.016(4)
C44 0.071(4) 0.088(4) 0.056(3) 0.007(3) 0.022(3) 0.002(4)
C45 0.040(3) 0.105(5) 0.067(3) 0.038(4) 0.016(3) 0.008(3)
Si4 0.0398(9) 0.0666(9) 0.0366(7) 0.0007(6) 0.0096(6) -0.0069(8)
N4 0.034(3) 0.042(2) 0.037(2) -0.0029(17) 0.009(2) 0.000(2)
C46 0.031(3) 0.040(3) 0.029(2) -0.002(2) 0.003(2) -0.001(2)
C47 0.051(4) 0.042(3) 0.042(3) -0.001(2) 0.007(3) -0.009(3)
C48 0.063(4) 0.049(3) 0.054(3) 0.015(3) 0.003(3) -0.015(3)
C49 0.046(4) 0.075(4) 0.042(3) 0.021(3) 0.015(3) -0.007(3)
C50 0.046(3) 0.055(3) 0.040(2) 0.006(2) 0.006(2) 0.007(3)
C51 0.034(3) 0.045(3) 0.032(2) 0.004(2) 0.003(2) 0.005(2)
C52 0.090(5) 0.037(3) 0.060(3) 0.003(3) 0.015(3) -0.009(3)
C53 0.077(5) 0.054(4) 0.102(5) -0.011(3) -0.020(4) -0.001(3)
C54 0.136(7) 0.074(5) 0.093(5) -0.039(4) -0.043(5) 0.024(5)
C55 0.057(3) 0.035(3) 0.041(2) 0.000(2) 0.001(2) 0.005(3)
C56 0.058(4) 0.048(3) 0.073(3) -0.012(3) -0.006(3) 0.001(3)
C57 0.073(4) 0.049(3) 0.077(4) -0.006(3) -0.006(3) 0.020(3)
C58 0.060(4) 0.077(4) 0.061(3) 0.010(3) 0.017(3) -0.009(3)
C59 0.156(8) 0.111(6) 0.083(4) -0.036(4) 0.073(5) -0.014(6)
C60 0.047(4) 0.223(10) 0.067(4) 0.055(5) -0.003(3) -0.030(5)

#==============================================================================

# MOLECULAR GEOMETRY
 
_geom_special_details
;
 All s.u.'s (except the s.u. in the dihedral angle between two l.s. planes)
 are estimated using the full covariance matrix.  The cell s.u.'s are taken
 into account individually in the estimation of s.u.'s in distances, angles
 and torsion angles; correlations between s.u.'s in cell parameters are only
 used when they are defined by crystal symmetry.  An approximate (isotropic)
 treatment of cell s.u.'s is used for estimating s.u.'s involving l.s. planes.
;
 
loop_
 _geom_bond_atom_site_label_1
 _geom_bond_atom_site_label_2
 _geom_bond_distance
 _geom_bond_site_symmetry_2
 _geom_bond_publ_flag
Si1 N1 1.732(4) . ?
Si1 C15 1.848(6) . ?
Si1 C14 1.853(5) . ?
Si1 C13 1.871(6) . ?
N1 C1 1.415(6) . ?
N1 H1A 0.85(3) . ?
C1 C6 1.405(6) . ?
C1 C2 1.414(6) . ?
C2 C3 1.378(7) . ?
C2 C7 1.532(6) . ?
C3 C4 1.382(7) . ?
C3 H3 0.9500 . ?
C4 C5 1.392(7) . ?
C4 H4 0.9500 . ?
C5 C6 1.378(7) . ?
C5 H5 0.9500 . ?
C6 C10 1.513(7) . ?
C7 C8 1.524(7) . ?
C7 C9 1.526(7) . ?
C7 H7 1.0000 . ?
C8 H8A 0.9800 . ?
C8 H8B 0.9800 . ?
C8 H8C 0.9800 . ?
C9 H9A 0.9800 . ?
C9 H9B 0.9800 . ?
C9 H9C 0.9800 . ?
C10 C12 1.500(8) . ?
C10 C11 1.560(8) . ?
C10 H10 1.0000 . ?
C11 H11A 0.9800 . ?
C11 H11B 0.9800 . ?
C11 H11C 0.9800 . ?
C12 H12A 0.9800 . ?
C12 H12B 0.9800 . ?
C12 H12C 0.9800 . ?
C13 H13A 0.9800 . ?
C13 H13B 0.9800 . ?
C13 H13C 0.9800 . ?
C14 H14A 0.9800 . ?
C14 H14B 0.9800 . ?
C14 H14C 0.9800 . ?
C15 H15A 0.9800 . ?
C15 H15B 0.9800 . ?
C15 H15C 0.9800 . ?
Si2 N2 1.720(4) . ?
Si2 C29B 1.768(17) . ?
Si2 C28A 1.808(10) . ?
Si2 C30A 1.833(9) . ?
Si2 C30B 1.917(17) . ?
Si2 C29A 1.932(10) . ?
Si2 C28B 1.945(18) . ?
N2 C16 1.411(6) . ?
N2 H2A 0.85(3) . ?
C16 C21 1.393(6) . ?
C16 C17 1.423(6) . ?
C17 C18 1.394(6) . ?
C17 C22 1.507(6) . ?
C18 C19 1.358(6) . ?
C18 H18 0.9500 . ?
C19 C20 1.365(7) . ?
C19 H19 0.9500 . ?
C20 C21 1.404(7) . ?
C20 H20 0.9500 . ?
C21 C25 1.517(6) . ?
C22 C23 1.499(7) . ?
C22 C24 1.506(8) . ?
C22 H22 1.0000 . ?
C23 H23A 0.9800 . ?
C23 H23B 0.9800 . ?
C23 H23C 0.9800 . ?
C24 H24A 0.9800 . ?
C24 H24B 0.9800 . ?
C24 H24C 0.9800 . ?
C25 C26 1.515(7) . ?
C25 C27 1.535(8) . ?
C25 H25 1.0000 . ?
C26 H26A 0.9800 . ?
C26 H26B 0.9800 . ?
C26 H26C 0.9800 . ?
C27 H27A 0.9800 . ?
C27 H27B 0.9800 . ?
C27 H27C 0.9800 . ?
C28A H28A 0.9800 . ?
C28A H28B 0.9800 . ?
C28A H28C 0.9800 . ?
C29A H29A 0.9800 . ?
C29A H29B 0.9800 . ?
C29A H29C 0.9800 . ?
C30A H30A 0.9800 . ?
C30A H30B 0.9800 . ?
C30A H30C 0.9800 . ?
C28B H28D 0.9800 . ?
C28B H28E 0.9800 . ?
C28B H28F 0.9800 . ?
C29B H29D 0.9800 . ?
C29B H29E 0.9800 . ?
C29B H29F 0.9800 . ?
C30B H30D 0.9800 . ?
C30B H30E 0.9800 . ?
C30B H30F 0.9800 . ?
Si3 N3 1.725(4) . ?
Si3 C44 1.835(6) . ?
Si3 C43 1.851(6) . ?
Si3 C45 1.853(5) . ?
N3 C31 1.427(6) . ?
N3 H3A 0.85(3) . ?
C31 C32 1.404(6) . ?
C31 C36 1.411(6) . ?
C32 C33 1.393(7) . ?
C32 C37 1.495(6) . ?
C33 C34 1.370(7) . ?
C33 H33 0.9500 . ?
C34 C35 1.368(8) . ?
C34 H34 0.9500 . ?
C35 C36 1.384(7) . ?
C35 H35 0.9500 . ?
C36 C40 1.514(7) . ?
C37 C38 1.530(8) . ?
C37 C39 1.541(8) . ?
C37 H37 1.0000 . ?
C38 H38A 0.9800 . ?
C38 H38B 0.9800 . ?
C38 H38C 0.9800 . ?
C39 H39A 0.9800 . ?
C39 H39B 0.9800 . ?
C39 H39C 0.9800 . ?
C40 C42 1.508(9) . ?
C40 C41 1.514(9) . ?
C40 H40 1.0000 . ?
C41 H41A 0.9800 . ?
C41 H41B 0.9800 . ?
C41 H41C 0.9800 . ?
C42 H42A 0.9800 . ?
C42 H42B 0.9800 . ?
C42 H42C 0.9800 . ?
C43 H43A 0.9800 . ?
C43 H43B 0.9800 . ?
C43 H43C 0.9800 . ?
C44 H44A 0.9800 . ?
C44 H44B 0.9800 . ?
C44 H44C 0.9800 . ?
C45 H45A 0.9800 . ?
C45 H45B 0.9800 . ?
C45 H45C 0.9800 . ?
Si4 N4 1.721(4) . ?
Si4 C60 1.843(6) . ?
Si4 C59 1.845(7) . ?
Si4 C58 1.858(6) . ?
N4 C46 1.409(6) . ?
N4 H4A 0.84(3) . ?
C46 C51 1.405(6) . ?
C46 C47 1.429(7) . ?
C47 C48 1.391(7) . ?
C47 C52 1.496(7) . ?
C48 C49 1.352(7) . ?
C48 H48 0.9500 . ?
C49 C50 1.393(8) . ?
C49 H49 0.9500 . ?
C50 C51 1.378(6) . ?
C50 H50 0.9500 . ?
C51 C55 1.515(7) . ?
C52 C54 1.518(8) . ?
C52 C53 1.526(8) . ?
C52 H52 1.0000 . ?
C53 H53A 0.9800 . ?
C53 H53B 0.9800 . ?
C53 H53C 0.9800 . ?
C54 H54A 0.9800 . ?
C54 H54B 0.9800 . ?
C54 H54C 0.9800 . ?
C55 C56 1.531(7) . ?
C55 C57 1.537(7) . ?
C55 H55 1.0000 . ?
C56 H56A 0.9800 . ?
C56 H56B 0.9800 . ?
C56 H56C 0.9800 . ?
C57 H57A 0.9800 . ?
C57 H57B 0.9800 . ?
C57 H57C 0.9800 . ?
C58 H58A 0.9800 . ?
C58 H58B 0.9800 . ?
C58 H58C 0.9800 . ?
C59 H59A 0.9800 . ?
C59 H59B 0.9800 . ?
C59 H59C 0.9800 . ?
C60 H60A 0.9800 . ?
C60 H60B 0.9800 . ?
C60 H60C 0.9800 . ?
 
loop_
 _geom_angle_atom_site_label_1
 _geom_angle_atom_site_label_2
 _geom_angle_atom_site_label_3
 _geom_angle
 _geom_angle_site_symmetry_1
 _geom_angle_site_symmetry_3
 _geom_angle_publ_flag
N1 Si1 C15 107.1(2) . . ?
N1 Si1 C14 109.6(2) . . ?
C15 Si1 C14 111.8(3) . . ?
N1 Si1 C13 111.1(3) . . ?
C15 Si1 C13 110.6(3) . . ?
C14 Si1 C13 106.7(3) . . ?
C1 N1 Si1 128.7(3) . . ?
C1 N1 H1A 123(4) . . ?
Si1 N1 H1A 108(4) . . ?
C6 C1 C2 120.0(5) . . ?
C6 C1 N1 120.4(4) . . ?
C2 C1 N1 119.6(4) . . ?
C3 C2 C1 118.4(4) . . ?
C3 C2 C7 121.4(4) . . ?
C1 C2 C7 120.2(4) . . ?
C2 C3 C4 122.5(5) . . ?
C2 C3 H3 118.7 . . ?
C4 C3 H3 118.7 . . ?
C3 C4 C5 118.1(5) . . ?
C3 C4 H4 120.9 . . ?
C5 C4 H4 120.9 . . ?
C6 C5 C4 121.9(5) . . ?
C6 C5 H5 119.0 . . ?
C4 C5 H5 119.0 . . ?
C5 C6 C1 119.0(4) . . ?
C5 C6 C10 118.9(4) . . ?
C1 C6 C10 122.0(5) . . ?
C8 C7 C9 108.8(4) . . ?
C8 C7 C2 109.6(4) . . ?
C9 C7 C2 113.6(4) . . ?
C8 C7 H7 108.2 . . ?
C9 C7 H7 108.2 . . ?
C2 C7 H7 108.2 . . ?
C7 C8 H8A 109.5 . . ?
C7 C8 H8B 109.5 . . ?
H8A C8 H8B 109.5 . . ?
C7 C8 H8C 109.5 . . ?
H8A C8 H8C 109.5 . . ?
H8B C8 H8C 109.5 . . ?
C7 C9 H9A 109.5 . . ?
C7 C9 H9B 109.5 . . ?
H9A C9 H9B 109.5 . . ?
C7 C9 H9C 109.5 . . ?
H9A C9 H9C 109.5 . . ?
H9B C9 H9C 109.5 . . ?
C12 C10 C6 113.8(5) . . ?
C12 C10 C11 110.1(5) . . ?
C6 C10 C11 110.1(5) . . ?
C12 C10 H10 107.5 . . ?
C6 C10 H10 107.5 . . ?
C11 C10 H10 107.5 . . ?
C10 C11 H11A 109.5 . . ?
C10 C11 H11B 109.5 . . ?
H11A C11 H11B 109.5 . . ?
C10 C11 H11C 109.5 . . ?
H11A C11 H11C 109.5 . . ?
H11B C11 H11C 109.5 . . ?
C10 C12 H12A 109.5 . . ?
C10 C12 H12B 109.5 . . ?
H12A C12 H12B 109.5 . . ?
C10 C12 H12C 109.5 . . ?
H12A C12 H12C 109.5 . . ?
H12B C12 H12C 109.5 . . ?
Si1 C13 H13A 109.5 . . ?
Si1 C13 H13B 109.5 . . ?
H13A C13 H13B 109.5 . . ?
Si1 C13 H13C 109.5 . . ?
H13A C13 H13C 109.5 . . ?
H13B C13 H13C 109.5 . . ?
Si1 C14 H14A 109.5 . . ?
Si1 C14 H14B 109.5 . . ?
H14A C14 H14B 109.5 . . ?
Si1 C14 H14C 109.5 . . ?
H14A C14 H14C 109.5 . . ?
H14B C14 H14C 109.5 . . ?
Si1 C15 H15A 109.5 . . ?
Si1 C15 H15B 109.5 . . ?
H15A C15 H15B 109.5 . . ?
Si1 C15 H15C 109.5 . . ?
H15A C15 H15C 109.5 . . ?
H15B C15 H15C 109.5 . . ?
N2 Si2 C29B 117.0(6) . . ?
N2 Si2 C28A 113.4(4) . . ?
C29B Si2 C28A 113.5(8) . . ?
N2 Si2 C30A 110.5(3) . . ?
C29B Si2 C30A 88.9(7) . . ?
C28A Si2 C30A 110.9(4) . . ?
N2 Si2 C30B 107.0(5) . . ?
C29B Si2 C30B 112.9(8) . . ?
C28A Si2 C30B 89.6(6) . . ?
C30A Si2 C30B 26.8(5) . . ?
N2 Si2 C29A 104.3(3) . . ?
C29B Si2 C29A 21.5(6) . . ?
C28A Si2 C29A 107.4(4) . . ?
C30A Si2 C29A 110.1(4) . . ?
C30B Si2 C29A 134.4(6) . . ?
N2 Si2 C28B 104.2(6) . . ?
C29B Si2 C28B 107.5(8) . . ?
C28A Si2 C28B 18.2(6) . . ?
C30A Si2 C28B 128.8(6) . . ?
C30B Si2 C28B 107.6(7) . . ?
C29A Si2 C28B 95.9(7) . . ?
C16 N2 Si2 130.9(3) . . ?
C16 N2 H2A 117(3) . . ?
Si2 N2 H2A 112(3) . . ?
C21 C16 N2 120.6(4) . . ?
C21 C16 C17 119.9(4) . . ?
N2 C16 C17 119.4(4) . . ?
C18 C17 C16 117.6(4) . . ?
C18 C17 C22 120.5(4) . . ?
C16 C17 C22 121.9(4) . . ?
C19 C18 C17 121.9(4) . . ?
C19 C18 H18 119.1 . . ?
C17 C18 H18 119.1 . . ?
C18 C19 C20 120.9(5) . . ?
C18 C19 H19 119.5 . . ?
C20 C19 H19 119.5 . . ?
C19 C20 C21 120.0(4) . . ?
C19 C20 H20 120.0 . . ?
C21 C20 H20 120.0 . . ?
C16 C21 C20 119.6(4) . . ?
C16 C21 C25 120.7(4) . . ?
C20 C21 C25 119.6(4) . . ?
C23 C22 C24 110.5(5) . . ?
C23 C22 C17 114.0(5) . . ?
C24 C22 C17 110.5(4) . . ?
C23 C22 H22 107.1 . . ?
C24 C22 H22 107.1 . . ?
C17 C22 H22 107.1 . . ?
C22 C23 H23A 109.5 . . ?
C22 C23 H23B 109.5 . . ?
H23A C23 H23B 109.5 . . ?
C22 C23 H23C 109.5 . . ?
H23A C23 H23C 109.5 . . ?
H23B C23 H23C 109.5 . . ?
C22 C24 H24A 109.5 . . ?
C22 C24 H24B 109.5 . . ?
H24A C24 H24B 109.5 . . ?
C22 C24 H24C 109.5 . . ?
H24A C24 H24C 109.5 . . ?
H24B C24 H24C 109.5 . . ?
C26 C25 C21 111.1(4) . . ?
C26 C25 C27 108.9(4) . . ?
C21 C25 C27 113.9(5) . . ?
C26 C25 H25 107.6 . . ?
C21 C25 H25 107.6 . . ?
C27 C25 H25 107.6 . . ?
C25 C26 H26A 109.5 . . ?
C25 C26 H26B 109.5 . . ?
H26A C26 H26B 109.5 . . ?
C25 C26 H26C 109.5 . . ?
H26A C26 H26C 109.5 . . ?
H26B C26 H26C 109.5 . . ?
C25 C27 H27A 109.5 . . ?
C25 C27 H27B 109.5 . . ?
H27A C27 H27B 109.5 . . ?
C25 C27 H27C 109.5 . . ?
H27A C27 H27C 109.5 . . ?
H27B C27 H27C 109.5 . . ?
Si2 C28A H28A 109.5 . . ?
Si2 C28A H28B 109.5 . . ?
Si2 C28A H28C 109.5 . . ?
Si2 C29A H29A 109.5 . . ?
Si2 C29A H29B 109.5 . . ?
Si2 C29A H29C 109.5 . . ?
Si2 C30A H30A 109.5 . . ?
Si2 C30A H30B 109.5 . . ?
Si2 C30A H30C 109.5 . . ?
Si2 C28B H28D 109.5 . . ?
Si2 C28B H28E 109.5 . . ?
H28D C28B H28E 109.5 . . ?
Si2 C28B H28F 109.5 . . ?
H28D C28B H28F 109.5 . . ?
H28E C28B H28F 109.5 . . ?
Si2 C29B H29D 109.5 . . ?
Si2 C29B H29E 109.5 . . ?
H29D C29B H29E 109.5 . . ?
Si2 C29B H29F 109.5 . . ?
H29D C29B H29F 109.5 . . ?
H29E C29B H29F 109.5 . . ?
Si2 C30B H30D 109.5 . . ?
Si2 C30B H30E 109.5 . . ?
H30D C30B H30E 109.5 . . ?
Si2 C30B H30F 109.5 . . ?
H30D C30B H30F 109.5 . . ?
H30E C30B H30F 109.5 . . ?
N3 Si3 C44 109.5(2) . . ?
N3 Si3 C43 110.3(2) . . ?
C44 Si3 C43 105.7(3) . . ?
N3 Si3 C45 108.1(2) . . ?
C44 Si3 C45 111.0(3) . . ?
C43 Si3 C45 112.1(3) . . ?
C31 N3 Si3 129.8(3) . . ?
C31 N3 H3A 130(4) . . ?
Si3 N3 H3A 100(4) . . ?
C32 C31 C36 120.9(4) . . ?
C32 C31 N3 119.3(4) . . ?
C36 C31 N3 119.7(4) . . ?
C33 C32 C31 117.2(4) . . ?
C33 C32 C37 121.1(5) . . ?
C31 C32 C37 121.7(4) . . ?
C34 C33 C32 122.6(5) . . ?
C34 C33 H33 118.7 . . ?
C32 C33 H33 118.7 . . ?
C35 C34 C33 119.1(5) . . ?
C35 C34 H34 120.5 . . ?
C33 C34 H34 120.5 . . ?
C34 C35 C36 121.9(5) . . ?
C34 C35 H35 119.0 . . ?
C36 C35 H35 119.0 . . ?
C35 C36 C31 118.1(5) . . ?
C35 C36 C40 119.6(4) . . ?
C31 C36 C40 122.2(5) . . ?
C32 C37 C38 111.1(4) . . ?
C32 C37 C39 114.3(5) . . ?
C38 C37 C39 109.0(5) . . ?
C32 C37 H37 107.4 . . ?
C38 C37 H37 107.4 . . ?
C39 C37 H37 107.4 . . ?
C37 C38 H38A 109.5 . . ?
C37 C38 H38B 109.5 . . ?
H38A C38 H38B 109.5 . . ?
C37 C38 H38C 109.5 . . ?
H38A C38 H38C 109.5 . . ?
H38B C38 H38C 109.5 . . ?
C37 C39 H39A 109.5 . . ?
C37 C39 H39B 109.5 . . ?
H39A C39 H39B 109.5 . . ?
C37 C39 H39C 109.5 . . ?
H39A C39 H39C 109.5 . . ?
H39B C39 H39C 109.5 . . ?
C42 C40 C36 110.7(5) . . ?
C42 C40 C41 109.9(5) . . ?
C36 C40 C41 114.4(5) . . ?
C42 C40 H40 107.1 . . ?
C36 C40 H40 107.1 . . ?
C41 C40 H40 107.1 . . ?
C40 C41 H41A 109.5 . . ?
C40 C41 H41B 109.5 . . ?
H41A C41 H41B 109.5 . . ?
C40 C41 H41C 109.5 . . ?
H41A C41 H41C 109.5 . . ?
H41B C41 H41C 109.5 . . ?
C40 C42 H42A 109.5 . . ?
C40 C42 H42B 109.5 . . ?
H42A C42 H42B 109.5 . . ?
C40 C42 H42C 109.5 . . ?
H42A C42 H42C 109.5 . . ?
H42B C42 H42C 109.5 . . ?
Si3 C43 H43A 109.5 . . ?
Si3 C43 H43B 109.5 . . ?
H43A C43 H43B 109.5 . . ?
Si3 C43 H43C 109.5 . . ?
H43A C43 H43C 109.5 . . ?
H43B C43 H43C 109.5 . . ?
Si3 C44 H44A 109.5 . . ?
Si3 C44 H44B 109.5 . . ?
H44A C44 H44B 109.5 . . ?
Si3 C44 H44C 109.5 . . ?
H44A C44 H44C 109.5 . . ?
H44B C44 H44C 109.5 . . ?
Si3 C45 H45A 109.5 . . ?
Si3 C45 H45B 109.5 . . ?
H45A C45 H45B 109.5 . . ?
Si3 C45 H45C 109.5 . . ?
H45A C45 H45C 109.5 . . ?
H45B C45 H45C 109.5 . . ?
N4 Si4 C60 107.4(3) . . ?
N4 Si4 C59 112.4(3) . . ?
C60 Si4 C59 111.1(4) . . ?
N4 Si4 C58 107.0(2) . . ?
C60 Si4 C58 112.5(4) . . ?
C59 Si4 C58 106.5(3) . . ?
C46 N4 Si4 130.8(3) . . ?
C46 N4 H4A 129(5) . . ?
Si4 N4 H4A 100(5) . . ?
C51 C46 N4 119.8(4) . . ?
C51 C46 C47 120.0(4) . . ?
N4 C46 C47 120.3(4) . . ?
C48 C47 C46 117.6(5) . . ?
C48 C47 C52 120.8(5) . . ?
C46 C47 C52 121.6(5) . . ?
C49 C48 C47 122.3(5) . . ?
C49 C48 H48 118.8 . . ?
C47 C48 H48 118.8 . . ?
C48 C49 C50 120.0(5) . . ?
C48 C49 H49 120.0 . . ?
C50 C49 H49 120.0 . . ?
C51 C50 C49 120.7(5) . . ?
C51 C50 H50 119.6 . . ?
C49 C50 H50 119.6 . . ?
C50 C51 C46 119.4(4) . . ?
C50 C51 C55 120.4(4) . . ?
C46 C51 C55 120.1(4) . . ?
C47 C52 C54 113.2(5) . . ?
C47 C52 C53 111.2(4) . . ?
C54 C52 C53 110.3(5) . . ?
C47 C52 H52 107.3 . . ?
C54 C52 H52 107.3 . . ?
C53 C52 H52 107.3 . . ?
C52 C53 H53A 109.5 . . ?
C52 C53 H53B 109.5 . . ?
H53A C53 H53B 109.5 . . ?
C52 C53 H53C 109.5 . . ?
H53A C53 H53C 109.5 . . ?
H53B C53 H53C 109.5 . . ?
C52 C54 H54A 109.5 . . ?
C52 C54 H54B 109.5 . . ?
H54A C54 H54B 109.5 . . ?
C52 C54 H54C 109.5 . . ?
H54A C54 H54C 109.5 . . ?
H54B C54 H54C 109.5 . . ?
C51 C55 C56 110.4(4) . . ?
C51 C55 C57 113.7(4) . . ?
C56 C55 C57 109.8(4) . . ?
C51 C55 H55 107.6 . . ?
C56 C55 H55 107.6 . . ?
C57 C55 H55 107.6 . . ?
C55 C56 H56A 109.5 . . ?
C55 C56 H56B 109.5 . . ?
H56A C56 H56B 109.5 . . ?
C55 C56 H56C 109.5 . . ?
H56A C56 H56C 109.5 . . ?
H56B C56 H56C 109.5 . . ?
C55 C57 H57A 109.5 . . ?
C55 C57 H57B 109.5 . . ?
H57A C57 H57B 109.5 . . ?
C55 C57 H57C 109.5 . . ?
H57A C57 H57C 109.5 . . ?
H57B C57 H57C 109.5 . . ?
Si4 C58 H58A 109.5 . . ?
Si4 C58 H58B 109.5 . . ?
H58A C58 H58B 109.5 . . ?
Si4 C58 H58C 109.5 . . ?
H58A C58 H58C 109.5 . . ?
H58B C58 H58C 109.5 . . ?
Si4 C59 H59A 109.5 . . ?
Si4 C59 H59B 109.5 . . ?
H59A C59 H59B 109.5 . . ?
Si4 C59 H59C 109.5 . . ?
H59A C59 H59C 109.5 . . ?
H59B C59 H59C 109.5 . . ?
Si4 C60 H60A 109.5 . . ?
Si4 C60 H60B 109.5 . . ?
H60A C60 H60B 109.5 . . ?
Si4 C60 H60C 109.5 . . ?
H60A C60 H60C 109.5 . . ?
H60B C60 H60C 109.5 . . ?
 
loop_
 _geom_torsion_atom_site_label_1
 _geom_torsion_atom_site_label_2
 _geom_torsion_atom_site_label_3
 _geom_torsion_atom_site_label_4
 _geom_torsion
 _geom_torsion_site_symmetry_1
 _geom_torsion_site_symmetry_2
 _geom_torsion_site_symmetry_3
 _geom_torsion_site_symmetry_4
 _geom_torsion_publ_flag
C15 Si1 N1 C1 5.5(5) . . . . ?
C14 Si1 N1 C1 127.0(4) . . . . ?
C13 Si1 N1 C1 -115.4(4) . . . . ?
Si1 N1 C1 C6 90.0(5) . . . . ?
Si1 N1 C1 C2 -92.2(5) . . . . ?
C6 C1 C2 C3 0.4(6) . . . . ?
N1 C1 C2 C3 -177.3(4) . . . . ?
C6 C1 C2 C7 179.8(4) . . . . ?
N1 C1 C2 C7 2.0(6) . . . . ?
C1 C2 C3 C4 0.6(7) . . . . ?
C7 C2 C3 C4 -178.8(4) . . . . ?
C2 C3 C4 C5 -1.5(7) . . . . ?
C3 C4 C5 C6 1.4(7) . . . . ?
C4 C5 C6 C1 -0.5(8) . . . . ?
C4 C5 C6 C10 178.0(5) . . . . ?
C2 C1 C6 C5 -0.4(7) . . . . ?
N1 C1 C6 C5 177.3(4) . . . . ?
C2 C1 C6 C10 -178.8(4) . . . . ?
N1 C1 C6 C10 -1.1(7) . . . . ?
C3 C2 C7 C8 90.7(5) . . . . ?
C1 C2 C7 C8 -88.7(5) . . . . ?
C3 C2 C7 C9 -31.3(6) . . . . ?
C1 C2 C7 C9 149.4(4) . . . . ?
C5 C6 C10 C12 51.6(7) . . . . ?
C1 C6 C10 C12 -130.0(5) . . . . ?
C5 C6 C10 C11 -72.5(7) . . . . ?
C1 C6 C10 C11 105.9(6) . . . . ?
C29B Si2 N2 C16 -110.2(9) . . . . ?
C28A Si2 N2 C16 114.7(6) . . . . ?
C30A Si2 N2 C16 -10.5(6) . . . . ?
C30B Si2 N2 C16 17.5(8) . . . . ?
C29A Si2 N2 C16 -128.8(5) . . . . ?
C28B Si2 N2 C16 131.2(7) . . . . ?
Si2 N2 C16 C21 -95.7(5) . . . . ?
Si2 N2 C16 C17 87.1(5) . . . . ?
C21 C16 C17 C18 -0.7(6) . . . . ?
N2 C16 C17 C18 176.5(4) . . . . ?
C21 C16 C17 C22 179.7(4) . . . . ?
N2 C16 C17 C22 -3.1(6) . . . . ?
C16 C17 C18 C19 -1.4(6) . . . . ?
C22 C17 C18 C19 178.2(4) . . . . ?
C17 C18 C19 C20 2.6(7) . . . . ?
C18 C19 C20 C21 -1.5(7) . . . . ?
N2 C16 C21 C20 -175.5(4) . . . . ?
C17 C16 C21 C20 1.6(6) . . . . ?
N2 C16 C21 C25 2.2(6) . . . . ?
C17 C16 C21 C25 179.4(4) . . . . ?
C19 C20 C21 C16 -0.6(6) . . . . ?
C19 C20 C21 C25 -178.3(4) . . . . ?
C18 C17 C22 C23 41.6(6) . . . . ?
C16 C17 C22 C23 -138.8(5) . . . . ?
C18 C17 C22 C24 -83.7(6) . . . . ?
C16 C17 C22 C24 95.9(6) . . . . ?
C16 C21 C25 C26 -90.7(5) . . . . ?
C20 C21 C25 C26 87.0(6) . . . . ?
C16 C21 C25 C27 145.9(5) . . . . ?
C20 C21 C25 C27 -36.4(6) . . . . ?
C44 Si3 N3 C31 -123.6(4) . . . . ?
C43 Si3 N3 C31 120.5(4) . . . . ?
C45 Si3 N3 C31 -2.4(5) . . . . ?
Si3 N3 C31 C32 93.6(5) . . . . ?
Si3 N3 C31 C36 -89.1(5) . . . . ?
C36 C31 C32 C33 -2.2(6) . . . . ?
N3 C31 C32 C33 175.1(4) . . . . ?
C36 C31 C32 C37 178.7(4) . . . . ?
N3 C31 C32 C37 -3.9(6) . . . . ?
C31 C32 C33 C34 -0.9(7) . . . . ?
C37 C32 C33 C34 178.1(5) . . . . ?
C32 C33 C34 C35 3.8(7) . . . . ?
C33 C34 C35 C36 -3.6(8) . . . . ?
C34 C35 C36 C31 0.6(7) . . . . ?
C34 C35 C36 C40 -178.2(5) . . . . ?
C32 C31 C36 C35 2.4(6) . . . . ?
N3 C31 C36 C35 -174.9(4) . . . . ?
C32 C31 C36 C40 -178.9(4) . . . . ?
N3 C31 C36 C40 3.8(7) . . . . ?
C33 C32 C37 C38 -92.2(6) . . . . ?
C31 C32 C37 C38 86.8(6) . . . . ?
C33 C32 C37 C39 31.6(6) . . . . ?
C31 C32 C37 C39 -149.3(5) . . . . ?
C35 C36 C40 C42 83.7(7) . . . . ?
C31 C36 C40 C42 -95.0(6) . . . . ?
C35 C36 C40 C41 -41.3(7) . . . . ?
C31 C36 C40 C41 140.1(5) . . . . ?
C60 Si4 N4 C46 -13.0(6) . . . . ?
C59 Si4 N4 C46 109.4(5) . . . . ?
C58 Si4 N4 C46 -134.0(4) . . . . ?
Si4 N4 C46 C51 97.4(5) . . . . ?
Si4 N4 C46 C47 -84.0(5) . . . . ?
C51 C46 C47 C48 1.4(6) . . . . ?
N4 C46 C47 C48 -177.3(4) . . . . ?
C51 C46 C47 C52 178.0(4) . . . . ?
N4 C46 C47 C52 -0.7(7) . . . . ?
C46 C47 C48 C49 0.2(7) . . . . ?
C52 C47 C48 C49 -176.4(5) . . . . ?
C47 C48 C49 C50 -0.8(8) . . . . ?
C48 C49 C50 C51 -0.2(7) . . . . ?
C49 C50 C51 C46 1.8(7) . . . . ?
C49 C50 C51 C55 176.4(4) . . . . ?
N4 C46 C51 C50 176.3(4) . . . . ?
C47 C46 C51 C50 -2.4(6) . . . . ?
N4 C46 C51 C55 1.7(6) . . . . ?
C47 C46 C51 C55 -177.0(4) . . . . ?
C48 C47 C52 C54 -52.7(7) . . . . ?
C46 C47 C52 C54 130.8(6) . . . . ?
C48 C47 C52 C53 72.1(7) . . . . ?
C46 C47 C52 C53 -104.4(5) . . . . ?
C50 C51 C55 C56 -88.3(5) . . . . ?
C46 C51 C55 C56 86.2(5) . . . . ?
C50 C51 C55 C57 35.6(6) . . . . ?
C46 C51 C55 C57 -149.8(4) . . . . ?
 
_diffrn_measured_fraction_theta_max    0.987
_diffrn_reflns_theta_full              24.00
_diffrn_measured_fraction_theta_full   0.987
_refine_diff_density_max    0.278
_refine_diff_density_min   -0.202
_refine_diff_density_rms    0.049

#=============================================================================
 
data_av_aw111b_tritylNHSiMe3

_audit_author_name                'Villinger, A.' 
_audit_creation_method            SHELXL-97 

#==============================================================================

# CHEMICAL DATA

_chemical_name_systematic
;
Triphenylmethylamino-trimethylsilane
;
_chemical_name_common             ?
_chemical_melting_point           ?
_chemical_formula_moiety          'C22 H25 N Si'
_chemical_formula_sum
 'C22 H25 N Si'
_chemical_formula_weight          331.52
 
loop_
 _atom_type_symbol
 _atom_type_description
 _atom_type_scat_dispersion_real
 _atom_type_scat_dispersion_imag
 _atom_type_scat_source
 'C'  'C'   0.0033   0.0016
 'International Tables Vol C Tables 4.2.6.8 and 6.1.1.4'
 'H'  'H'   0.0000   0.0000
 'International Tables Vol C Tables 4.2.6.8 and 6.1.1.4'
 'N'  'N'   0.0061   0.0033
 'International Tables Vol C Tables 4.2.6.8 and 6.1.1.4'
 'Si'  'Si'   0.0817   0.0704
 'International Tables Vol C Tables 4.2.6.8 and 6.1.1.4'
 
#==============================================================================

# CRYSTAL DATA
 
_symmetry_cell_setting            triclinic
_symmetry_space_group_name_H-M    'P -1'
_symmetry_space_group_name_Hall   '-P 1'
_symmetry_Int_Tables_number       2
 
loop_
 _symmetry_equiv_pos_as_xyz
 'x, y, z'
 '-x, -y, -z'
 
_cell_length_a                    10.4992(6)
_cell_length_b                    10.5357(6)
_cell_length_c                    10.8697(6)
_cell_angle_alpha                 71.356(3)
_cell_angle_beta                  62.236(3)
_cell_angle_gamma                 65.318(2)
_cell_volume                      954.96(9)
_cell_formula_units_Z             2
_cell_measurement_temperature     173(2)
_cell_measurement_reflns_used     9490
_cell_measurement_theta_min       4.948
_cell_measurement_theta_max       60.739
 
_exptl_crystal_description        needle
_exptl_crystal_colour             colourless
_exptl_crystal_size_max           0.44
_exptl_crystal_size_mid           0.11
_exptl_crystal_size_min           0.08
_exptl_crystal_density_meas       ?
_exptl_crystal_density_diffrn     1.153
_exptl_crystal_density_method     'not measured'
_exptl_crystal_F_000              356
_exptl_absorpt_coefficient_mu     0.125
_exptl_absorpt_correction_type    multi-scan
_exptl_absorpt_correction_T_min   0.9469
_exptl_absorpt_correction_T_max   0.9900
_exptl_absorpt_process_details    '(SADABS; Sheldrick, 2004)'

#==============================================================================

# EXPERIMENTAL DATA
 
_exptl_special_details
;
 ?
;
 
_diffrn_ambient_temperature       173(2)
_diffrn_radiation_wavelength      0.71073
_diffrn_radiation_type            MoK\a
_diffrn_radiation_source          'sealed tube'
_diffrn_radiation_monochromator   graphite
_diffrn_measurement_device_type   'Bruker Apex Kappa II-CCD-diffractometer'
_diffrn_measurement_method        'phi and omega scans'
_diffrn_detector_area_resol_mean  ?
_diffrn_standards_number          ?
_diffrn_standards_interval_count  ?
_diffrn_standards_interval_time   ?
_diffrn_standards_decay_%         ?
_diffrn_reflns_number             28452
_diffrn_reflns_av_R_equivalents   0.0425
_diffrn_reflns_av_sigmaI/netI     0.0337
_diffrn_reflns_limit_h_min        -13
_diffrn_reflns_limit_h_max        14
_diffrn_reflns_limit_k_min        -14
_diffrn_reflns_limit_k_max        14
_diffrn_reflns_limit_l_min        -15
_diffrn_reflns_limit_l_max        15
_diffrn_reflns_theta_min          2.14
_diffrn_reflns_theta_max          30.00
_reflns_number_total              5572
_reflns_number_gt                 4362
_reflns_threshold_expression      >2\s(I)
 
_computing_data_collection        'Bruker Apex V7.51A'
_computing_cell_refinement        'Bruker Apex V7.51A'
_computing_data_reduction         'Bruker SAINT'
_computing_structure_solution     'SHELXS-97 (Sheldrick, 1997)'
_computing_structure_refinement   'SHELXL-97 (Sheldrick, 1997)'
_computing_molecular_graphics     'ORTEP-3v2.01 (Farrugia, 1997)' 
_computing_publication_material   'SHELXL-97'

#==============================================================================

# REFINEMENT DATA 

_refine_special_details
;
 All H atoms (except H1) were positioned geometrically and refined using a 
 riding model, with C---H = 0.98 (methyl groups), 0.99\%A (methylene groups), 
 1.00\%A (methine groups) or 0.95 \%A (aryl CH) and with <i>U</i>~iso~(H) = 
 1.5 times <i>U</i>~eq~(C) (methyl groups) or with <i>U</i>~iso~(H) = 1.2 times 
 <i>U</i>~eq~(C) (methylene  groups, aryl CH, methine groups). Torsion angles 
 of all methyl groups were allowed to refine.
 
 Refinement of F^2^ against ALL reflections.  The weighted R-factor wR and
 goodness of fit S are based on F^2^, conventional R-factors R are based
 on F, with F set to zero for negative F^2^. The threshold expression of
 F^2^ > 2\s(F^2^) is used only for calculating R-factors(gt) etc. and is
 not relevant to the choice of reflections for refinement.  R-factors based
 on F^2^ are statistically about twice as large as those based on F, and R-
 factors based on ALL data will be even larger.
;
 
_refine_ls_structure_factor_coef  Fsqd
_refine_ls_matrix_type            full
_refine_ls_weighting_scheme       calc
_refine_ls_weighting_details
 'calc w=1/[\s^2^(Fo^2^)+(0.0550P)^2^+0.1367P] where P=(Fo^2^+2Fc^2^)/3'
_atom_sites_solution_primary      direct
_atom_sites_solution_secondary    difmap
_atom_sites_solution_hydrogens    geom
_refine_ls_hydrogen_treatment     mixed
_refine_ls_extinction_method      none
_refine_ls_extinction_coef        ?
_refine_ls_number_reflns          5572
_refine_ls_number_parameters      224
_refine_ls_number_restraints      0
_refine_ls_R_factor_all           0.0590
_refine_ls_R_factor_gt            0.0428
_refine_ls_wR_factor_ref          0.1200
_refine_ls_wR_factor_gt           0.1120
_refine_ls_goodness_of_fit_ref    1.099
_refine_ls_restrained_S_all       1.099
_refine_ls_shift/su_max           0.000
_refine_ls_shift/su_mean          0.000

#==============================================================================

# ATOMIC COORDINATES AND DISPLACEMENT PARAMETERS
 
loop_
 _atom_site_label
 _atom_site_type_symbol
 _atom_site_fract_x
 _atom_site_fract_y
 _atom_site_fract_z
 _atom_site_U_iso_or_equiv
 _atom_site_adp_type
 _atom_site_occupancy
 _atom_site_symmetry_multiplicity
 _atom_site_calc_flag
 _atom_site_refinement_flags
 _atom_site_disorder_assembly
 _atom_site_disorder_group
Si1 Si 0.96317(4) 0.68436(3) 0.26543(4) 0.02976(10) Uani 1 1 d . . .
N1 N 0.88262(12) 0.83559(10) 0.16995(11) 0.0289(2) Uani 1 1 d . . .
C1 C 0.77082(13) 0.88070(11) 0.10672(12) 0.0251(2) Uani 1 1 d . . .
C2 C 0.84856(13) 0.86899(11) -0.05176(12) 0.0266(2) Uani 1 1 d . . .
C3 C 1.00155(14) 0.85394(13) -0.12655(13) 0.0323(3) Uani 1 1 d . . .
H3 H 1.0608 0.8493 -0.0797 0.039 Uiso 1 1 calc R . .
C4 C 1.06925(16) 0.84552(16) -0.26937(14) 0.0420(3) Uani 1 1 d . . .
H4 H 1.1741 0.8359 -0.3194 0.050 Uiso 1 1 calc R . .
C5 C 0.98548(18) 0.85098(16) -0.33905(15) 0.0452(3) Uani 1 1 d . . .
H5 H 1.0322 0.8454 -0.4368 0.054 Uiso 1 1 calc R . .
C6 C 0.83346(17) 0.86457(15) -0.26580(14) 0.0404(3) Uani 1 1 d . . .
H6 H 0.7751 0.8681 -0.3131 0.049 Uiso 1 1 calc R . .
C7 C 0.76559(15) 0.87316(13) -0.12344(13) 0.0331(3) Uani 1 1 d . . .
H7 H 0.6609 0.8820 -0.0738 0.040 Uiso 1 1 calc R . .
C8 C 0.67001(13) 0.78409(12) 0.18289(12) 0.0269(2) Uani 1 1 d . . .
C9 C 0.72998(16) 0.64652(13) 0.15433(14) 0.0350(3) Uani 1 1 d . . .
H9 H 0.8290 0.6166 0.0843 0.042 Uiso 1 1 calc R . .
C10 C 0.64828(18) 0.55222(15) 0.22597(15) 0.0431(3) Uani 1 1 d . . .
H10 H 0.6923 0.4581 0.2063 0.052 Uiso 1 1 calc R . .
C11 C 0.50310(18) 0.59502(16) 0.32574(15) 0.0452(3) Uani 1 1 d . . .
H11 H 0.4470 0.5306 0.3757 0.054 Uiso 1 1 calc R . .
C12 C 0.44063(17) 0.73139(17) 0.35209(16) 0.0459(3) Uani 1 1 d . . .
H12 H 0.3398 0.7620 0.4192 0.055 Uiso 1 1 calc R . .
C13 C 0.52336(15) 0.82573(14) 0.28148(14) 0.0362(3) Uani 1 1 d . . .
H13 H 0.4784 0.9198 0.3014 0.043 Uiso 1 1 calc R . .
C14 C 0.67448(13) 1.03622(12) 0.12827(13) 0.0278(2) Uani 1 1 d . . .
C15 C 0.62210(15) 1.13788(13) 0.02919(14) 0.0335(3) Uani 1 1 d . . .
H15 H 0.6474 1.1131 -0.0580 0.040 Uiso 1 1 calc R . .
C16 C 0.53303(16) 1.27571(14) 0.05559(17) 0.0425(3) Uani 1 1 d . . .
H16 H 0.4987 1.3438 -0.0137 0.051 Uiso 1 1 calc R . .
C17 C 0.49475(16) 1.31342(14) 0.18116(18) 0.0455(4) Uani 1 1 d . . .
H17 H 0.4337 1.4071 0.1993 0.055 Uiso 1 1 calc R . .
C18 C 0.54566(17) 1.21431(16) 0.28056(17) 0.0458(4) Uani 1 1 d . . .
H18 H 0.5199 1.2399 0.3675 0.055 Uiso 1 1 calc R . .
C19 C 0.63423(16) 1.07747(14) 0.25460(15) 0.0380(3) Uani 1 1 d . . .
H19 H 0.6682 1.0103 0.3244 0.046 Uiso 1 1 calc R . .
C20 C 1.0874(2) 0.53217(19) 0.1688(3) 0.0734(6) Uani 1 1 d . . .
H20A H 1.0248 0.4926 0.1573 0.110 Uiso 1 1 calc R . .
H20B H 1.1466 0.4596 0.2220 0.110 Uiso 1 1 calc R . .
H20C H 1.1566 0.5638 0.0760 0.110 Uiso 1 1 calc R . .
C21 C 1.08395(18) 0.74093(16) 0.30472(17) 0.0469(4) Uani 1 1 d . . .
H21A H 1.1654 0.7629 0.2169 0.070 Uiso 1 1 calc R . .
H21B H 1.1284 0.6645 0.3673 0.070 Uiso 1 1 calc R . .
H21C H 1.0219 0.8252 0.3507 0.070 Uiso 1 1 calc R . .
C22 C 0.8205(2) 0.6272(2) 0.43252(18) 0.0723(6) Uani 1 1 d . . .
H22A H 0.7593 0.7050 0.4877 0.108 Uiso 1 1 calc R . .
H22B H 0.8724 0.5457 0.4863 0.108 Uiso 1 1 calc R . .
H22C H 0.7543 0.6005 0.4120 0.108 Uiso 1 1 calc R . .
H1 H 0.9200(17) 0.9011(16) 0.1515(16) 0.039(4) Uiso 1 1 d . . .
 
loop_
 _atom_site_aniso_label
 _atom_site_aniso_U_11
 _atom_site_aniso_U_22
 _atom_site_aniso_U_33
 _atom_site_aniso_U_23
 _atom_site_aniso_U_13
 _atom_site_aniso_U_12
Si1 0.02728(18) 0.02899(17) 0.03094(18) 0.00110(13) -0.01418(14) -0.00800(13)
N1 0.0335(5) 0.0265(5) 0.0347(5) 0.0007(4) -0.0205(4) -0.0125(4)
C1 0.0271(5) 0.0242(5) 0.0268(5) -0.0024(4) -0.0132(4) -0.0088(4)
C2 0.0289(6) 0.0239(5) 0.0279(5) -0.0011(4) -0.0132(5) -0.0089(4)
C3 0.0311(6) 0.0339(6) 0.0329(6) -0.0038(5) -0.0130(5) -0.0115(5)
C4 0.0349(7) 0.0498(8) 0.0340(7) -0.0089(6) -0.0059(6) -0.0138(6)
C5 0.0504(9) 0.0500(8) 0.0301(6) -0.0097(6) -0.0113(6) -0.0139(7)
C6 0.0499(8) 0.0435(7) 0.0357(7) -0.0073(6) -0.0241(6) -0.0124(6)
C7 0.0338(6) 0.0367(6) 0.0324(6) -0.0046(5) -0.0157(5) -0.0116(5)
C8 0.0306(6) 0.0282(5) 0.0264(5) -0.0005(4) -0.0147(5) -0.0120(4)
C9 0.0398(7) 0.0332(6) 0.0356(6) -0.0056(5) -0.0133(6) -0.0162(5)
C10 0.0585(9) 0.0356(7) 0.0458(8) 0.0006(6) -0.0235(7) -0.0259(6)
C11 0.0564(9) 0.0532(8) 0.0393(7) 0.0070(6) -0.0207(7) -0.0375(7)
C12 0.0373(7) 0.0596(9) 0.0414(8) -0.0052(7) -0.0072(6) -0.0270(7)
C13 0.0313(6) 0.0382(7) 0.0391(7) -0.0065(5) -0.0116(5) -0.0131(5)
C14 0.0261(6) 0.0265(5) 0.0338(6) -0.0042(4) -0.0132(5) -0.0095(4)
C15 0.0355(7) 0.0280(6) 0.0396(7) -0.0016(5) -0.0184(6) -0.0107(5)
C16 0.0413(7) 0.0279(6) 0.0613(9) -0.0014(6) -0.0282(7) -0.0081(5)
C17 0.0370(7) 0.0315(6) 0.0749(10) -0.0201(7) -0.0265(7) -0.0030(5)
C18 0.0414(8) 0.0453(8) 0.0587(9) -0.0254(7) -0.0222(7) -0.0052(6)
C19 0.0401(7) 0.0360(6) 0.0418(7) -0.0121(5) -0.0205(6) -0.0060(5)
C20 0.0566(11) 0.0474(9) 0.1231(18) -0.0391(11) -0.0482(12) 0.0118(8)
C21 0.0516(9) 0.0503(8) 0.0503(8) 0.0055(7) -0.0343(7) -0.0195(7)
C22 0.0570(10) 0.1099(16) 0.0463(9) 0.0358(10) -0.0292(8) -0.0481(11)

#==============================================================================

# MOLECULAR GEOMETRY
 
_geom_special_details
;
 All s.u.'s (except the s.u. in the dihedral angle between two l.s. planes)
 are estimated using the full covariance matrix.  The cell s.u.'s are taken
 into account individually in the estimation of s.u.'s in distances, angles
 and torsion angles; correlations between s.u.'s in cell parameters are only
 used when they are defined by crystal symmetry.  An approximate (isotropic)
 treatment of cell s.u.'s is used for estimating s.u.'s involving l.s. planes.
;
 
loop_
 _geom_bond_atom_site_label_1
 _geom_bond_atom_site_label_2
 _geom_bond_distance
 _geom_bond_site_symmetry_2
 _geom_bond_publ_flag
Si1 N1 1.7223(10) . ?
Si1 C22 1.8506(16) . ?
Si1 C20 1.8516(17) . ?
Si1 C21 1.8559(15) . ?
N1 C1 1.4673(14) . ?
N1 H1 0.857(16) . ?
C1 C8 1.5447(16) . ?
C1 C2 1.5462(16) . ?
C1 C14 1.5502(15) . ?
C2 C3 1.3854(17) . ?
C2 C7 1.3952(17) . ?
C3 C4 1.3893(18) . ?
C3 H3 0.9500 . ?
C4 C5 1.379(2) . ?
C4 H4 0.9500 . ?
C5 C6 1.378(2) . ?
C5 H5 0.9500 . ?
C6 C7 1.3852(18) . ?
C6 H6 0.9500 . ?
C7 H7 0.9500 . ?
C8 C13 1.3823(18) . ?
C8 C9 1.3918(17) . ?
C9 C10 1.3871(18) . ?
C9 H9 0.9500 . ?
C10 C11 1.379(2) . ?
C10 H10 0.9500 . ?
C11 C12 1.370(2) . ?
C11 H11 0.9500 . ?
C12 C13 1.3942(18) . ?
C12 H12 0.9500 . ?
C13 H13 0.9500 . ?
C14 C15 1.3899(17) . ?
C14 C19 1.3930(17) . ?
C15 C16 1.3956(17) . ?
C15 H15 0.9500 . ?
C16 C17 1.373(2) . ?
C16 H16 0.9500 . ?
C17 C18 1.376(2) . ?
C17 H17 0.9500 . ?
C18 C19 1.3852(18) . ?
C18 H18 0.9500 . ?
C19 H19 0.9500 . ?
C20 H20A 0.9800 . ?
C20 H20B 0.9800 . ?
C20 H20C 0.9800 . ?
C21 H21A 0.9800 . ?
C21 H21B 0.9800 . ?
C21 H21C 0.9800 . ?
C22 H22A 0.9800 . ?
C22 H22B 0.9800 . ?
C22 H22C 0.9800 . ?
 
loop_
 _geom_angle_atom_site_label_1
 _geom_angle_atom_site_label_2
 _geom_angle_atom_site_label_3
 _geom_angle
 _geom_angle_site_symmetry_1
 _geom_angle_site_symmetry_3
 _geom_angle_publ_flag
N1 Si1 C22 112.67(7) . . ?
N1 Si1 C20 115.12(8) . . ?
C22 Si1 C20 108.94(11) . . ?
N1 Si1 C21 102.55(6) . . ?
C22 Si1 C21 109.32(8) . . ?
C20 Si1 C21 107.86(8) . . ?
C1 N1 Si1 136.90(8) . . ?
C1 N1 H1 111.1(10) . . ?
Si1 N1 H1 111.9(10) . . ?
N1 C1 C8 108.36(9) . . ?
N1 C1 C2 111.61(9) . . ?
C8 C1 C2 108.68(9) . . ?
N1 C1 C14 107.20(9) . . ?
C8 C1 C14 110.68(9) . . ?
C2 C1 C14 110.30(9) . . ?
C3 C2 C7 118.11(11) . . ?
C3 C2 C1 121.38(10) . . ?
C7 C2 C1 120.50(10) . . ?
C2 C3 C4 120.69(12) . . ?
C2 C3 H3 119.7 . . ?
C4 C3 H3 119.7 . . ?
C5 C4 C3 120.54(13) . . ?
C5 C4 H4 119.7 . . ?
C3 C4 H4 119.7 . . ?
C6 C5 C4 119.47(13) . . ?
C6 C5 H5 120.3 . . ?
C4 C5 H5 120.3 . . ?
C5 C6 C7 120.13(13) . . ?
C5 C6 H6 119.9 . . ?
C7 C6 H6 119.9 . . ?
C6 C7 C2 121.06(12) . . ?
C6 C7 H7 119.5 . . ?
C2 C7 H7 119.5 . . ?
C13 C8 C9 117.68(11) . . ?
C13 C8 C1 123.42(10) . . ?
C9 C8 C1 118.87(11) . . ?
C10 C9 C8 121.42(13) . . ?
C10 C9 H9 119.3 . . ?
C8 C9 H9 119.3 . . ?
C11 C10 C9 120.00(13) . . ?
C11 C10 H10 120.0 . . ?
C9 C10 H10 120.0 . . ?
C12 C11 C10 119.31(12) . . ?
C12 C11 H11 120.3 . . ?
C10 C11 H11 120.3 . . ?
C11 C12 C13 120.73(14) . . ?
C11 C12 H12 119.6 . . ?
C13 C12 H12 119.6 . . ?
C8 C13 C12 120.80(13) . . ?
C8 C13 H13 119.6 . . ?
C12 C13 H13 119.6 . . ?
C15 C14 C19 117.33(11) . . ?
C15 C14 C1 123.64(11) . . ?
C19 C14 C1 119.01(10) . . ?
C14 C15 C16 121.13(13) . . ?
C14 C15 H15 119.4 . . ?
C16 C15 H15 119.4 . . ?
C17 C16 C15 120.33(13) . . ?
C17 C16 H16 119.8 . . ?
C15 C16 H16 119.8 . . ?
C16 C17 C18 119.42(12) . . ?
C16 C17 H17 120.3 . . ?
C18 C17 H17 120.3 . . ?
C17 C18 C19 120.39(14) . . ?
C17 C18 H18 119.8 . . ?
C19 C18 H18 119.8 . . ?
C18 C19 C14 121.41(13) . . ?
C18 C19 H19 119.3 . . ?
C14 C19 H19 119.3 . . ?
Si1 C20 H20A 109.5 . . ?
Si1 C20 H20B 109.5 . . ?
H20A C20 H20B 109.5 . . ?
Si1 C20 H20C 109.5 . . ?
H20A C20 H20C 109.5 . . ?
H20B C20 H20C 109.5 . . ?
Si1 C21 H21A 109.5 . . ?
Si1 C21 H21B 109.5 . . ?
H21A C21 H21B 109.5 . . ?
Si1 C21 H21C 109.5 . . ?
H21A C21 H21C 109.5 . . ?
H21B C21 H21C 109.5 . . ?
Si1 C22 H22A 109.5 . . ?
Si1 C22 H22B 109.5 . . ?
H22A C22 H22B 109.5 . . ?
Si1 C22 H22C 109.5 . . ?
H22A C22 H22C 109.5 . . ?
H22B C22 H22C 109.5 . . ?
 
loop_
 _geom_torsion_atom_site_label_1
 _geom_torsion_atom_site_label_2
 _geom_torsion_atom_site_label_3
 _geom_torsion_atom_site_label_4
 _geom_torsion
 _geom_torsion_site_symmetry_1
 _geom_torsion_site_symmetry_2
 _geom_torsion_site_symmetry_3
 _geom_torsion_site_symmetry_4
 _geom_torsion_publ_flag
C22 Si1 N1 C1 -59.05(15) . . . . ?
C20 Si1 N1 C1 66.71(15) . . . . ?
C21 Si1 N1 C1 -176.45(12) . . . . ?
Si1 N1 C1 C8 22.20(16) . . . . ?
Si1 N1 C1 C2 -97.44(13) . . . . ?
Si1 N1 C1 C14 141.68(11) . . . . ?
N1 C1 C2 C3 -15.59(15) . . . . ?
C8 C1 C2 C3 -135.04(11) . . . . ?
C14 C1 C2 C3 103.46(12) . . . . ?
N1 C1 C2 C7 164.31(10) . . . . ?
C8 C1 C2 C7 44.86(14) . . . . ?
C14 C1 C2 C7 -76.64(13) . . . . ?
C7 C2 C3 C4 0.99(18) . . . . ?
C1 C2 C3 C4 -179.11(11) . . . . ?
C2 C3 C4 C5 -0.5(2) . . . . ?
C3 C4 C5 C6 -0.2(2) . . . . ?
C4 C5 C6 C7 0.2(2) . . . . ?
C5 C6 C7 C2 0.3(2) . . . . ?
C3 C2 C7 C6 -0.92(18) . . . . ?
C1 C2 C7 C6 179.17(11) . . . . ?
N1 C1 C8 C13 103.69(13) . . . . ?
C2 C1 C8 C13 -134.85(12) . . . . ?
C14 C1 C8 C13 -13.58(15) . . . . ?
N1 C1 C8 C9 -74.62(13) . . . . ?
C2 C1 C8 C9 46.84(13) . . . . ?
C14 C1 C8 C9 168.11(10) . . . . ?
C13 C8 C9 C10 -2.53(19) . . . . ?
C1 C8 C9 C10 175.88(12) . . . . ?
C8 C9 C10 C11 1.5(2) . . . . ?
C9 C10 C11 C12 0.5(2) . . . . ?
C10 C11 C12 C13 -1.4(2) . . . . ?
C9 C8 C13 C12 1.67(19) . . . . ?
C1 C8 C13 C12 -176.66(12) . . . . ?
C11 C12 C13 C8 0.3(2) . . . . ?
N1 C1 C14 C15 142.84(11) . . . . ?
C8 C1 C14 C15 -99.17(13) . . . . ?
C2 C1 C14 C15 21.14(15) . . . . ?
N1 C1 C14 C19 -38.66(14) . . . . ?
C8 C1 C14 C19 79.32(13) . . . . ?
C2 C1 C14 C19 -160.37(11) . . . . ?
C19 C14 C15 C16 0.13(19) . . . . ?
C1 C14 C15 C16 178.65(11) . . . . ?
C14 C15 C16 C17 -0.3(2) . . . . ?
C15 C16 C17 C18 0.3(2) . . . . ?
C16 C17 C18 C19 -0.3(2) . . . . ?
C17 C18 C19 C14 0.1(2) . . . . ?
C15 C14 C19 C18 -0.1(2) . . . . ?
C1 C14 C19 C18 -178.64(12) . . . . ?
 
_diffrn_measured_fraction_theta_max    0.999
_diffrn_reflns_theta_full              30.00
_diffrn_measured_fraction_theta_full   0.999
_refine_diff_density_max    0.312
_refine_diff_density_min   -0.209
_refine_diff_density_rms    0.042

#=============================================================================
 
data_av_aw135_Ph2C(C6H5)NSiMe2PCl2

_audit_author_name                'Villinger, A.' 
_audit_creation_method            SHELXL-97 

#==============================================================================

# CHEMICAL DATA

_chemical_name_systematic
;
 ?
;
_chemical_name_common             ?
_chemical_melting_point           ?
_chemical_formula_moiety          'C21 H20 Cl2 N P Si'
_chemical_formula_sum
 'C21 H20 Cl2 N P Si'
_chemical_formula_weight          416.34
 
loop_
 _atom_type_symbol
 _atom_type_description
 _atom_type_scat_dispersion_real
 _atom_type_scat_dispersion_imag
 _atom_type_scat_source
 'C'  'C'   0.0033   0.0016
 'International Tables Vol C Tables 4.2.6.8 and 6.1.1.4'
 'H'  'H'   0.0000   0.0000
 'International Tables Vol C Tables 4.2.6.8 and 6.1.1.4'
 'N'  'N'   0.0061   0.0033
 'International Tables Vol C Tables 4.2.6.8 and 6.1.1.4'
 'Si'  'Si'   0.0817   0.0704
 'International Tables Vol C Tables 4.2.6.8 and 6.1.1.4'
 'P'  'P'   0.1023   0.0942
 'International Tables Vol C Tables 4.2.6.8 and 6.1.1.4'
 'Cl'  'Cl'   0.1484   0.1585
 'International Tables Vol C Tables 4.2.6.8 and 6.1.1.4'
 
#==============================================================================

# CRYSTAL DATA
 
_symmetry_cell_setting            monoclinic
_symmetry_space_group_name_H-M    'P 21/n'
_symmetry_space_group_name_Hall   '-P 2yn'
_symmetry_Int_Tables_number       14
 
loop_
 _symmetry_equiv_pos_as_xyz
 'x, y, z'
 '-x+1/2, y+1/2, -z+1/2'
 '-x, -y, -z'
 'x-1/2, -y-1/2, z-1/2'
 
_cell_length_a                    14.9031(4)
_cell_length_b                    16.7323(4)
_cell_length_c                    17.0281(4)
_cell_angle_alpha                 90.00
_cell_angle_beta                  108.3870(10)
_cell_angle_gamma                 90.00
_cell_volume                      4029.40(17)
_cell_formula_units_Z             8
_cell_measurement_temperature     173(2)
_cell_measurement_reflns_used     9912 
_cell_measurement_theta_min       5.016   
_cell_measurement_theta_max       57.147
 
_exptl_crystal_description        plate
_exptl_crystal_colour             colourless
_exptl_crystal_size_max           0.35
_exptl_crystal_size_mid           0.22
_exptl_crystal_size_min           0.06
_exptl_crystal_density_meas       ?
_exptl_crystal_density_diffrn     1.373
_exptl_crystal_density_method     'not measured'
_exptl_crystal_F_000              1728
_exptl_absorpt_coefficient_mu     0.466
_exptl_absorpt_correction_type    multi-scan
_exptl_absorpt_correction_T_min   0.8538
_exptl_absorpt_correction_T_max   0.9726
_exptl_absorpt_process_details    '(SADABS; Sheldrick, 2004)'

#==============================================================================

# EXPERIMENTAL DATA
 
_exptl_special_details
;
 ?
;
 
_diffrn_ambient_temperature       173(2)
_diffrn_radiation_wavelength      0.71073
_diffrn_radiation_type            MoK\a
_diffrn_radiation_source          'sealed tube'
_diffrn_radiation_monochromator   graphite
_diffrn_measurement_device_type   'Bruker Apex Kappa II-CCD-diffractometer'
_diffrn_measurement_method        'phi and omega scans'
_diffrn_detector_area_resol_mean  ?
_diffrn_standards_number          ?
_diffrn_standards_interval_count  ?
_diffrn_standards_interval_time   ?
_diffrn_standards_decay_%         ?
_diffrn_reflns_number             52509
_diffrn_reflns_av_R_equivalents   0.0459
_diffrn_reflns_av_sigmaI/netI     0.0385
_diffrn_reflns_limit_h_min        -20
_diffrn_reflns_limit_h_max        20
_diffrn_reflns_limit_k_min        -22
_diffrn_reflns_limit_k_max        22
_diffrn_reflns_limit_l_min        -22
_diffrn_reflns_limit_l_max        23
_diffrn_reflns_theta_min          1.59
_diffrn_reflns_theta_max          29.00
_reflns_number_total              10703
_reflns_number_gt                 7976
_reflns_threshold_expression      >2\s(I)
 
_computing_data_collection        'Bruker Apex V7.51A'
_computing_cell_refinement        'Bruker Apex V7.51A'
_computing_data_reduction         'Bruker SAINT'
_computing_structure_solution     'SHELXS-97 (Sheldrick, 1997)'
_computing_structure_refinement   'SHELXL-97 (Sheldrick, 1997)'
_computing_molecular_graphics     'ORTEP-3v2.01 (Farrugia, 1997)' 
_computing_publication_material   'SHELXL-97'

#==============================================================================

# REFINEMENT DATA 

_refine_special_details
;
 All H atoms were positioned geometrically and refined using a riding model, 
 with C---H = 0.98 (methyl groups), 0.99\%A (methylene groups), 
 1.00\%A (methine groups) or 0.95 \%A (aryl CH) and with <i>U</i>~iso~(H) = 
 1.5 times <i>U</i>~eq~(C) (methyl groups) or with <i>U</i>~iso~(H) = 1.2 times 
 <i>U</i>~eq~(C) (methylene  groups, aryl CH, methine groups). Torsion angles 
 of all methyl groups were allowed to refine.
 
 Refinement of F^2^ against ALL reflections.  The weighted R-factor wR and
 goodness of fit S are based on F^2^, conventional R-factors R are based
 on F, with F set to zero for negative F^2^. The threshold expression of
 F^2^ > 2\s(F^2^) is used only for calculating R-factors(gt) etc. and is
 not relevant to the choice of reflections for refinement.  R-factors based
 on F^2^ are statistically about twice as large as those based on F, and R-
 factors based on ALL data will be even larger.
;
 
_refine_ls_structure_factor_coef  Fsqd
_refine_ls_matrix_type            full
_refine_ls_weighting_scheme       calc
_refine_ls_weighting_details
 'calc w=1/[\s^2^(Fo^2^)+(0.0446P)^2^+2.4318P] where P=(Fo^2^+2Fc^2^)/3'
_atom_sites_solution_primary      direct
_atom_sites_solution_secondary    difmap
_atom_sites_solution_hydrogens    geom
_refine_ls_hydrogen_treatment     constr
_refine_ls_extinction_method      none
_refine_ls_extinction_coef        ?
_refine_ls_number_reflns          10703
_refine_ls_number_parameters      643
_refine_ls_number_restraints      110
_refine_ls_R_factor_all           0.0689
_refine_ls_R_factor_gt            0.0469
_refine_ls_wR_factor_ref          0.1198
_refine_ls_wR_factor_gt           0.1126
_refine_ls_goodness_of_fit_ref    1.037
_refine_ls_restrained_S_all       1.038
_refine_ls_shift/su_max           0.001
_refine_ls_shift/su_mean          0.000

#==============================================================================

# ATOMIC COORDINATES AND DISPLACEMENT PARAMETERS
 
loop_
 _atom_site_label
 _atom_site_type_symbol
 _atom_site_fract_x
 _atom_site_fract_y
 _atom_site_fract_z
 _atom_site_U_iso_or_equiv
 _atom_site_adp_type
 _atom_site_occupancy
 _atom_site_symmetry_multiplicity
 _atom_site_calc_flag
 _atom_site_refinement_flags
 _atom_site_disorder_assembly
 _atom_site_disorder_group
N1A N 0.11294(12) 0.28237(9) 0.88691(10) 0.0247(3) Uani 0.8921(13) 1 d PD A 1
P1A P 0.05514(5) 0.31628(4) 0.79319(4) 0.03601(16) Uani 0.8921(13) 1 d PD A 1
Cl1A Cl -0.07127(9) 0.36115(8) 0.80412(10) 0.0620(3) Uani 0.8921(13) 1 d PD A 1
Cl2A Cl 0.12198(5) 0.42516(4) 0.79604(4) 0.04888(18) Uani 0.8921(13) 1 d PD A 1
Si1A Si 0.15915(4) 0.33312(3) 0.98230(4) 0.02758(14) Uani 0.8921(13) 1 d PD A 1
C20A C 0.27373(19) 0.38339(16) 0.99380(18) 0.0453(6) Uani 0.8921(13) 1 d PD A 1
H20A H 0.3147 0.3473 0.9752 0.068 Uiso 0.8921(13) 1 calc PR A 1
H20B H 0.3044 0.3972 1.0521 0.068 Uiso 0.8921(13) 1 calc PR A 1
H20C H 0.2625 0.4321 0.9602 0.068 Uiso 0.8921(13) 1 calc PR A 1
C21A C 0.0737(4) 0.4114(3) 0.9952(4) 0.094(3) Uani 0.8921(13) 1 d PD A 1
H21A H 0.0673 0.4536 0.9539 0.141 Uiso 0.8921(13) 1 calc PR A 1
H21B H 0.0976 0.4345 1.0508 0.141 Uiso 0.8921(13) 1 calc PR A 1
H21C H 0.0119 0.3868 0.9875 0.141 Uiso 0.8921(13) 1 calc PR A 1
C1A C 0.12349(14) 0.19254(11) 0.89327(12) 0.0243(4) Uani 0.8921(13) 1 d PD A 1
C8A C 0.20903(18) 0.16487(13) 0.86731(15) 0.0268(4) Uani 0.8921(13) 1 d PD A 1
C9A C 0.2307(3) 0.08377(14) 0.8680(3) 0.0347(5) Uani 0.8921(13) 1 d PD A 1
H9A H 0.1919 0.0458 0.8833 0.042 Uiso 0.8921(13) 1 calc PR A 1
C10A C 0.30777(18) 0.05800(15) 0.84667(19) 0.0379(6) Uani 0.8921(13) 1 d PD A 1
H10A H 0.3202 0.0024 0.8456 0.046 Uiso 0.8921(13) 1 calc PR A 1
C11A C 0.36697(18) 0.11206(17) 0.82694(17) 0.0425(6) Uani 0.8921(13) 1 d PD A 1
H11A H 0.4210 0.0942 0.8138 0.051 Uiso 0.8921(13) 1 calc PR A 1
C12A C 0.34667(19) 0.19216(17) 0.82661(18) 0.0456(6) Uani 0.8921(13) 1 d PD A 1
H12A H 0.3869 0.2299 0.8129 0.055 Uiso 0.8921(13) 1 calc PR A 1
C13A C 0.26802(17) 0.21850(14) 0.84610(15) 0.0365(5) Uani 0.8921(13) 1 d PD A 1
H13A H 0.2545 0.2741 0.8448 0.044 Uiso 0.8921(13) 1 calc PR A 1
C14A C 0.14452(18) 0.17402(13) 0.98562(13) 0.0252(4) Uani 0.8921(13) 1 d PD A 1
C15A C 0.1409(3) 0.09711(17) 1.01572(16) 0.0352(5) Uani 0.8921(13) 1 d PD A 1
H15A H 0.1216 0.0534 0.9787 0.042 Uiso 0.8921(13) 1 calc PR A 1
C16A C 0.16586(18) 0.08515(16) 1.10085(16) 0.0405(6) Uani 0.8921(13) 1 d PD A 1
H16A H 0.1641 0.0327 1.1216 0.049 Uiso 0.8921(13) 1 calc PR A 1
C17A C 0.19297(18) 0.14771(18) 1.15516(15) 0.0395(6) Uani 0.8921(13) 1 d PD A 1
H17A H 0.2100 0.1385 1.2131 0.047 Uiso 0.8921(13) 1 calc PR A 1
C18A C 0.19546(17) 0.22408(16) 1.12548(14) 0.0369(5) Uani 0.8921(13) 1 d PD A 1
H18A H 0.2142 0.2674 1.1632 0.044 Uiso 0.8921(13) 1 calc PR A 1
C19A C 0.17066(15) 0.23826(13) 1.04030(13) 0.0273(4) Uani 0.8921(13) 1 d PD A 1
N1B N 0.1057(4) 0.2795(2) 0.9065(6) 0.0247(3) Uani 0.1079(13) 1 d PD A 2
P1B P 0.0113(3) 0.3124(3) 0.9282(4) 0.0490(16) Uani 0.1079(13) 1 d PD A 2
Cl1B Cl -0.0620(7) 0.3799(5) 0.8246(5) 0.070(4) Uani 0.1079(13) 1 d PD A 2
Cl2B Cl 0.0699(6) 0.4071(4) 1.0054(5) 0.064(4) Uani 0.1079(13) 1 d PD A 2
Si1B Si 0.1992(3) 0.3327(3) 0.8873(3) 0.0368(14) Uani 0.1079(13) 1 d PD A 2
C20B C 0.2714(9) 0.3909(8) 0.9783(7) 0.0453(6) Uani 0.1079(13) 1 d PD A 2
H20D H 0.2954 0.3551 1.0259 0.068 Uiso 0.1079(13) 1 calc PR A 2
H20E H 0.2322 0.4326 0.9914 0.068 Uiso 0.1079(13) 1 calc PR A 2
H20F H 0.3247 0.4157 0.9655 0.068 Uiso 0.1079(13) 1 calc PR A 2
C21B C 0.1528(8) 0.4047(8) 0.7984(9) 0.04888(18) Uani 0.1079(13) 1 d PD A 2
H21D H 0.1146 0.3756 0.7493 0.073 Uiso 0.1079(13) 1 calc PR A 2
H21E H 0.2060 0.4306 0.7863 0.073 Uiso 0.1079(13) 1 calc PR A 2
H21F H 0.1138 0.4454 0.8133 0.073 Uiso 0.1079(13) 1 calc PR A 2
C1B C 0.1182(5) 0.1899(2) 0.9110(5) 0.0243(4) Uani 0.1079(13) 1 d PD A 2
C8B C 0.1412(14) 0.1600(4) 1.0011(5) 0.0252(4) Uani 0.1079(13) 1 d PD A 2
C9B C 0.129(3) 0.0795(7) 1.0166(7) 0.0352(5) Uani 0.1079(13) 1 d PD A 2
H9B H 0.1070 0.0435 0.9715 0.042 Uiso 0.1079(13) 1 calc PR A 2
C10B C 0.1501(17) 0.0516(7) 1.0965(7) 0.0405(6) Uani 0.1079(13) 1 d PD A 2
H10B H 0.1389 -0.0029 1.1059 0.049 Uiso 0.1079(13) 1 calc PR A 2
C11B C 0.1869(14) 0.1020(9) 1.1628(6) 0.0395(6) Uani 0.1079(13) 1 d PD A 2
H11B H 0.2036 0.0821 1.2178 0.047 Uiso 0.1079(13) 1 calc PR A 2
C12B C 0.1989(18) 0.1814(9) 1.1483(5) 0.0369(5) Uani 0.1079(13) 1 d PD A 2
H12B H 0.2239 0.2167 1.1937 0.044 Uiso 0.1079(13) 1 calc PR A 2
C13B C 0.1750(12) 0.2106(6) 1.0681(5) 0.0273(4) Uani 0.1079(13) 1 d PD A 2
H13B H 0.1819 0.2660 1.0591 0.033 Uiso 0.1079(13) 1 calc PR A 2
C14B C 0.2039(11) 0.1731(3) 0.8819(14) 0.0268(4) Uani 0.1079(13) 1 d PD A 2
C15B C 0.2338(18) 0.0960(4) 0.872(3) 0.0347(5) Uani 0.1079(13) 1 d PD A 2
H15B H 0.1971 0.0510 0.8766 0.042 Uiso 0.1079(13) 1 calc PR A 2
C16B C 0.3181(13) 0.0858(5) 0.8539(18) 0.0379(6) Uani 0.1079(13) 1 d PD A 2
H16B H 0.3427 0.0335 0.8534 0.046 Uiso 0.1079(13) 1 calc PR A 2
C17B C 0.3662(11) 0.1501(6) 0.8371(16) 0.0425(6) Uani 0.1079(13) 1 d PD A 2
H17B H 0.4210 0.1420 0.8210 0.051 Uiso 0.1079(13) 1 calc PR A 2
C18B C 0.3345(11) 0.2264(5) 0.8437(15) 0.0456(6) Uani 0.1079(13) 1 d PD A 2
H18B H 0.3664 0.2709 0.8302 0.055 Uiso 0.1079(13) 1 calc PR A 2
C19B C 0.2556(8) 0.2389(4) 0.8701(10) 0.0365(5) Uani 0.1079(13) 1 d PD A 2
C2 C 0.02904(13) 0.15389(11) 0.84277(11) 0.0275(4) Uani 1 1 d . . .
C3 C -0.05102(15) 0.16516(13) 0.86627(13) 0.0378(5) Uani 1 1 d . A .
H3 H -0.0459 0.1935 0.9158 0.045 Uiso 1 1 calc R . .
C4 C -0.13809(15) 0.13601(15) 0.81912(14) 0.0432(5) Uani 1 1 d . . .
H4 H -0.1923 0.1454 0.8357 0.052 Uiso 1 1 calc R A .
C5 C -0.14629(16) 0.09347(13) 0.74836(14) 0.0437(5) Uani 1 1 d . A .
H5 H -0.2058 0.0725 0.7163 0.052 Uiso 1 1 calc R . .
C6 C -0.06800(17) 0.08151(15) 0.72433(15) 0.0494(6) Uani 1 1 d . . .
H6 H -0.0733 0.0520 0.6754 0.059 Uiso 1 1 calc R A .
C7 C 0.01943(15) 0.11220(14) 0.77078(13) 0.0414(5) Uani 1 1 d . A .
H7 H 0.0729 0.1043 0.7527 0.050 Uiso 1 1 calc R . .
N2A N 0.68727(12) 0.28668(9) 0.99585(11) 0.0241(4) Uani 0.8090(11) 1 d PD B 1
P2A P 0.78337(5) 0.31277(4) 0.97298(4) 0.03159(16) Uani 0.8090(11) 1 d PD B 1
Cl3A Cl 0.73700(6) 0.41670(5) 0.90581(6) 0.0528(2) Uani 0.8090(11) 1 d PD B 1
Cl4A Cl 0.86799(9) 0.36692(10) 1.08098(13) 0.0678(4) Uani 0.8090(11) 1 d PD B 1
Si2A Si 0.60434(5) 0.34433(4) 1.02631(4) 0.02602(15) Uani 0.8090(11) 1 d PD B 1
C41A C 0.6572(3) 0.4079(2) 1.1174(3) 0.0427(10) Uani 0.8090(11) 1 d PD B 1
H41A H 0.6952 0.3748 1.1634 0.064 Uiso 0.8090(11) 1 calc PR B 1
H41B H 0.6070 0.4345 1.1333 0.064 Uiso 0.8090(11) 1 calc PR B 1
H41C H 0.6978 0.4483 1.1039 0.064 Uiso 0.8090(11) 1 calc PR B 1
C42A C 0.52493(19) 0.40579(16) 0.94123(17) 0.0430(7) Uani 0.8090(11) 1 d PD B 1
H42A H 0.5600 0.4518 0.9304 0.064 Uiso 0.8090(11) 1 calc PR B 1
H42B H 0.4711 0.4247 0.9575 0.064 Uiso 0.8090(11) 1 calc PR B 1
H42C H 0.5019 0.3732 0.8910 0.064 Uiso 0.8090(11) 1 calc PR B 1
C22A C 0.67244(14) 0.19690(10) 0.99798(12) 0.0231(4) Uani 0.8090(11) 1 d PD B 1
C23A C 0.64955(17) 0.16121(12) 0.91053(14) 0.0230(4) Uani 0.8090(11) 1 d PD B 1
C24A C 0.60780(17) 0.20760(14) 0.84087(14) 0.0294(5) Uani 0.8090(11) 1 d PD B 1
H24A H 0.5991 0.2632 0.8471 0.035 Uiso 0.8090(11) 1 calc PR B 1
C25A C 0.5786(2) 0.17405(17) 0.76259(16) 0.0357(6) Uani 0.8090(11) 1 d PD B 1
H25A H 0.5505 0.2067 0.7156 0.043 Uiso 0.8090(11) 1 calc PR B 1
C26A C 0.59036(18) 0.09295(16) 0.75256(15) 0.0353(6) Uani 0.8090(11) 1 d PD B 1
H26A H 0.5699 0.0698 0.6989 0.042 Uiso 0.8090(11) 1 calc PR B 1
C27A C 0.63198(18) 0.04611(16) 0.82123(16) 0.0342(5) Uani 0.8090(11) 1 d PD B 1
H27A H 0.6404 -0.0095 0.8147 0.041 Uiso 0.8090(11) 1 calc PR B 1
C28A C 0.6615(2) 0.07959(15) 0.89954(15) 0.0274(5) Uani 0.8090(11) 1 d PD B 1
H28A H 0.6901 0.0468 0.9463 0.033 Uiso 0.8090(11) 1 calc PR B 1
C35A C 0.58529(17) 0.18592(13) 1.02638(13) 0.0231(4) Uani 0.8090(11) 1 d PD B 1
C36A C 0.5496(2) 0.11110(16) 1.03443(18) 0.0316(7) Uani 0.8090(11) 1 d PD B 1
H36A H 0.5787 0.0646 1.0215 0.038 Uiso 0.8090(11) 1 calc PR B 1
C37A C 0.4715(2) 0.10405(18) 1.06137(18) 0.0375(6) Uani 0.8090(11) 1 d PD B 1
H37A H 0.4468 0.0526 1.0663 0.045 Uiso 0.8090(11) 1 calc PR B 1
C38A C 0.42898(19) 0.17162(19) 1.08123(18) 0.0377(6) Uani 0.8090(11) 1 d PD B 1
H38A H 0.3754 0.1667 1.0997 0.045 Uiso 0.8090(11) 1 calc PR B 1
C39A C 0.46571(18) 0.24625(16) 1.07382(16) 0.0342(5) Uani 0.8090(11) 1 d PD B 1
H39A H 0.4373 0.2926 1.0880 0.041 Uiso 0.8090(11) 1 calc PR B 1
C40A C 0.54380(17) 0.25436(14) 1.04587(15) 0.0269(5) Uani 0.8090(11) 1 d PD B 1
N2B N 0.6794(3) 0.29328(15) 1.02287(15) 0.0241(4) Uani 0.1910(11) 1 d PD B 2
P2B P 0.73526(19) 0.33097(14) 1.11529(12) 0.0366(7) Uani 0.1910(11) 1 d PD B 2
Cl3B Cl 0.6624(3) 0.43756(17) 1.1104(3) 0.0420(10) Uani 0.1910(11) 1 d PD B 2
Cl4B Cl 0.8577(2) 0.3796(3) 1.1010(5) 0.068(3) Uani 0.1910(11) 1 d PD B 2
Si2B Si 0.63406(19) 0.33819(13) 0.92413(12) 0.0312(7) Uani 0.1910(11) 1 d PD B 2
C41B C 0.7180(6) 0.4049(5) 0.8971(5) 0.0528(2) Uani 0.1910(11) 1 d PD B 2
H41D H 0.7772 0.3762 0.9035 0.079 Uiso 0.1910(11) 1 calc PR B 2
H41E H 0.7308 0.4515 0.9339 0.079 Uiso 0.1910(11) 1 calc PR B 2
H41F H 0.6908 0.4227 0.8396 0.079 Uiso 0.1910(11) 1 calc PR B 2
C42B C 0.5196(4) 0.3912(4) 0.9074(4) 0.0430(7) Uani 0.1910(11) 1 d PD B 2
H42D H 0.4759 0.3565 0.9242 0.064 Uiso 0.1910(11) 1 calc PR B 2
H42E H 0.4921 0.4048 0.8487 0.064 Uiso 0.1910(11) 1 calc PR B 2
H42F H 0.5304 0.4403 0.9406 0.064 Uiso 0.1910(11) 1 calc PR B 2
C22B C 0.6694(3) 0.20267(16) 1.0216(2) 0.0231(4) Uani 0.1910(11) 1 d PD B 2
C23B C 0.5846(5) 0.1785(2) 1.0498(5) 0.0231(4) Uani 0.1910(11) 1 d PD B 2
C24B C 0.5617(8) 0.0985(3) 1.0542(11) 0.0316(7) Uani 0.1910(11) 1 d PD B 2
H24B H 0.5996 0.0583 1.0410 0.038 Uiso 0.1910(11) 1 calc PR B 2
C25B C 0.4842(7) 0.0765(4) 1.0776(9) 0.0375(6) Uani 0.1910(11) 1 d PD B 2
H25B H 0.4731 0.0217 1.0859 0.045 Uiso 0.1910(11) 1 calc PR B 2
C26B C 0.4229(6) 0.1343(5) 1.0890(9) 0.0377(6) Uani 0.1910(11) 1 d PD B 2
H26B H 0.3680 0.1193 1.1024 0.045 Uiso 0.1910(11) 1 calc PR B 2
C27B C 0.4422(6) 0.2141(5) 1.0806(8) 0.0342(5) Uani 0.1910(11) 1 d PD B 2
H27B H 0.4007 0.2539 1.0887 0.041 Uiso 0.1910(11) 1 calc PR B 2
C28B C 0.5218(6) 0.2363(3) 1.0605(7) 0.0269(5) Uani 0.1910(11) 1 d PD B 2
H28B H 0.5337 0.2912 1.0539 0.032 Uiso 0.1910(11) 1 calc PR B 2
C35B C 0.6461(6) 0.1793(2) 0.9302(2) 0.0230(4) Uani 0.1910(11) 1 d PD B 2
C36B C 0.6500(11) 0.1012(3) 0.9052(3) 0.0294(5) Uani 0.1910(11) 1 d PD B 2
H36B H 0.6723 0.0602 0.9453 0.035 Uiso 0.1910(11) 1 calc PR B 2
C37B C 0.6214(9) 0.0825(3) 0.8217(3) 0.0357(6) Uani 0.1910(11) 1 d PD B 2
H37B H 0.6228 0.0285 0.8047 0.043 Uiso 0.1910(11) 1 calc PR B 2
C38B C 0.5906(10) 0.1423(3) 0.7627(3) 0.0353(6) Uani 0.1910(11) 1 d PD B 2
H38B H 0.5694 0.1293 0.7054 0.042 Uiso 0.1910(11) 1 calc PR B 2
C39B C 0.5912(7) 0.2209(3) 0.7883(2) 0.0342(5) Uani 0.1910(11) 1 d PD B 2
H39B H 0.5739 0.2622 0.7481 0.041 Uiso 0.1910(11) 1 calc PR B 2
C40B C 0.6167(5) 0.2403(2) 0.8722(2) 0.0274(5) Uani 0.1910(11) 1 d PD B 2
C29 C 0.76104(13) 0.16142(11) 1.06376(12) 0.0300(4) Uani 1 1 d . . .
C30 C 0.83912(15) 0.14094(15) 1.03952(15) 0.0464(6) Uani 1 1 d . B .
H30 H 0.8353 0.1445 0.9829 0.056 Uiso 1 1 calc R . .
C31 C 0.92239(16) 0.11540(17) 1.09771(18) 0.0553(7) Uani 1 1 d . . .
H31 H 0.9757 0.1033 1.0807 0.066 Uiso 1 1 calc R B .
C32 C 0.92867(18) 0.10742(15) 1.17848(17) 0.0535(6) Uani 1 1 d . B .
H32 H 0.9858 0.0896 1.2178 0.064 Uiso 1 1 calc R . .
C33 C 0.85106(18) 0.12549(17) 1.20292(16) 0.0546(6) Uani 1 1 d . . .
H33 H 0.8545 0.1193 1.2592 0.066 Uiso 1 1 calc R B .
C34 C 0.76814(16) 0.15266(14) 1.14569(14) 0.0417(5) Uani 1 1 d . B .
H34 H 0.7155 0.1654 1.1634 0.050 Uiso 1 1 calc R . .
 
loop_
 _atom_site_aniso_label
 _atom_site_aniso_U_11
 _atom_site_aniso_U_22
 _atom_site_aniso_U_33
 _atom_site_aniso_U_23
 _atom_site_aniso_U_13
 _atom_site_aniso_U_12
N1A 0.0242(8) 0.0241(7) 0.0248(9) 0.0013(6) 0.0064(7) 0.0020(6)
P1A 0.0406(4) 0.0340(3) 0.0261(3) 0.0072(2) 0.0001(2) 0.0001(3)
Cl1A 0.0295(4) 0.0652(7) 0.0811(6) 0.0337(7) 0.0028(4) 0.0115(5)
Cl2A 0.0538(4) 0.0417(3) 0.0503(4) 0.0177(3) 0.0153(3) -0.0039(3)
Si1A 0.0294(3) 0.0267(3) 0.0263(3) -0.0039(2) 0.0084(2) -0.0006(2)
C20A 0.0387(13) 0.0438(13) 0.0445(15) 0.0030(11) 0.0006(11) -0.0107(10)
C21A 0.090(4) 0.075(4) 0.153(6) -0.072(3) 0.090(4) -0.037(3)
C1A 0.0258(9) 0.0223(8) 0.0250(10) 0.0002(7) 0.0084(8) 0.0015(7)
C8A 0.0230(9) 0.0318(10) 0.0251(13) -0.0023(8) 0.0069(8) 0.0027(8)
C9A 0.0317(11) 0.0321(11) 0.0412(13) 0.0012(12) 0.0128(9) 0.0059(10)
C10A 0.0335(12) 0.0366(13) 0.0425(14) -0.0033(13) 0.0104(11) 0.0101(11)
C11A 0.0300(12) 0.0562(17) 0.0441(14) -0.0043(13) 0.0158(10) 0.0111(12)
C12A 0.0398(14) 0.0460(15) 0.0606(17) -0.0004(13) 0.0296(13) 0.0000(12)
C13A 0.0374(12) 0.0352(12) 0.0429(14) -0.0008(10) 0.0213(11) 0.0023(10)
C14A 0.0207(9) 0.0305(10) 0.0242(10) 0.0033(8) 0.0068(8) 0.0042(8)
C15A 0.0357(17) 0.0328(13) 0.0387(11) 0.0077(9) 0.0139(9) 0.0048(13)
C16A 0.0322(13) 0.0451(15) 0.0457(14) 0.0222(12) 0.0145(11) 0.0098(12)
C17A 0.0294(12) 0.0596(17) 0.0275(11) 0.0173(11) 0.0063(9) 0.0035(14)
C18A 0.0318(12) 0.0530(15) 0.0239(11) 0.0022(10) 0.0060(9) -0.0001(11)
C19A 0.0240(10) 0.0341(11) 0.0239(10) 0.0019(8) 0.0078(8) 0.0004(9)
N1B 0.0242(8) 0.0241(7) 0.0248(9) 0.0013(6) 0.0064(7) 0.0020(6)
P1B 0.048(3) 0.037(3) 0.070(4) 0.004(3) 0.028(3) 0.010(2)
Cl1B 0.052(6) 0.039(4) 0.110(9) -0.006(4) 0.013(5) 0.010(4)
Cl2B 0.089(8) 0.062(6) 0.045(4) 0.005(4) 0.027(4) 0.043(6)
Si1B 0.036(3) 0.039(3) 0.035(3) 0.003(2) 0.012(2) 0.000(2)
C20B 0.0387(13) 0.0438(13) 0.0445(15) 0.0030(11) 0.0006(11) -0.0107(10)
C21B 0.0538(4) 0.0417(3) 0.0503(4) 0.0177(3) 0.0153(3) -0.0039(3)
C1B 0.0258(9) 0.0223(8) 0.0250(10) 0.0002(7) 0.0084(8) 0.0015(7)
C8B 0.0207(9) 0.0305(10) 0.0242(10) 0.0033(8) 0.0068(8) 0.0042(8)
C9B 0.0357(17) 0.0328(13) 0.0387(11) 0.0077(9) 0.0139(9) 0.0048(13)
C10B 0.0322(13) 0.0451(15) 0.0457(14) 0.0222(12) 0.0145(11) 0.0098(12)
C11B 0.0294(12) 0.0596(17) 0.0275(11) 0.0173(11) 0.0063(9) 0.0035(14)
C12B 0.0318(12) 0.0530(15) 0.0239(11) 0.0022(10) 0.0060(9) -0.0001(11)
C13B 0.0240(10) 0.0341(11) 0.0239(10) 0.0019(8) 0.0078(8) 0.0004(9)
C14B 0.0230(9) 0.0318(10) 0.0251(13) -0.0023(8) 0.0069(8) 0.0027(8)
C15B 0.0317(11) 0.0321(11) 0.0412(13) 0.0012(12) 0.0128(9) 0.0059(10)
C16B 0.0335(12) 0.0366(13) 0.0425(14) -0.0033(13) 0.0104(11) 0.0101(11)
C17B 0.0300(12) 0.0562(17) 0.0441(14) -0.0043(13) 0.0158(10) 0.0111(12)
C18B 0.0398(14) 0.0460(15) 0.0606(17) -0.0004(13) 0.0296(13) 0.0000(12)
C19B 0.0374(12) 0.0352(12) 0.0429(14) -0.0008(10) 0.0213(11) 0.0023(10)
C2 0.0262(9) 0.0254(8) 0.0292(9) -0.0008(7) 0.0061(7) 0.0006(7)
C3 0.0309(11) 0.0480(12) 0.0354(11) -0.0078(9) 0.0119(9) -0.0061(9)
C4 0.0278(11) 0.0583(14) 0.0433(12) -0.0002(10) 0.0107(9) -0.0071(10)
C5 0.0339(12) 0.0416(12) 0.0443(13) -0.0012(10) -0.0036(9) -0.0055(9)
C6 0.0424(13) 0.0591(15) 0.0362(12) -0.0160(11) -0.0027(10) 0.0077(11)
C7 0.0321(11) 0.0578(14) 0.0308(11) -0.0091(10) 0.0049(8) 0.0094(10)
N2A 0.0247(9) 0.0209(8) 0.0280(10) 0.0014(7) 0.0100(8) -0.0020(6)
P2A 0.0292(3) 0.0285(3) 0.0413(4) 0.0017(3) 0.0170(3) -0.0042(2)
Cl3A 0.0619(5) 0.0357(4) 0.0700(5) 0.0165(3) 0.0340(4) -0.0013(3)
Cl4A 0.0402(5) 0.0969(11) 0.0616(7) -0.0162(7) 0.0093(5) -0.0343(6)
Si2A 0.0291(3) 0.0230(3) 0.0274(3) 0.0025(2) 0.0109(3) 0.0037(2)
C41A 0.064(2) 0.0273(19) 0.0420(19) -0.0043(16) 0.0239(15) -0.0060(18)
C42A 0.0434(14) 0.0411(14) 0.0439(18) 0.0111(13) 0.0131(13) 0.0162(11)
C22A 0.0237(9) 0.0204(8) 0.0251(12) 0.0013(8) 0.0075(8) -0.0021(7)
C23A 0.0204(9) 0.0243(11) 0.0261(11) -0.0028(8) 0.0101(9) -0.0007(8)
C24A 0.0290(12) 0.0323(12) 0.0277(12) 0.0021(9) 0.0102(10) -0.0004(9)
C25A 0.0334(14) 0.0443(15) 0.0284(12) 0.0025(10) 0.0083(10) -0.0017(13)
C26A 0.0283(12) 0.0478(15) 0.0299(12) -0.0122(11) 0.0092(10) -0.0060(12)
C27A 0.0272(12) 0.0375(13) 0.0395(14) -0.0092(11) 0.0129(10) -0.0033(11)
C28A 0.0248(12) 0.0253(11) 0.0333(12) -0.0026(9) 0.0110(9) -0.0012(10)
C35A 0.0227(9) 0.0280(9) 0.0168(13) 0.0030(8) 0.0039(9) -0.0007(7)
C36A 0.0373(13) 0.0288(11) 0.031(2) -0.0014(10) 0.0137(13) -0.0078(10)
C37A 0.0403(14) 0.0417(17) 0.0322(16) -0.0010(12) 0.0136(12) -0.0170(13)
C38A 0.0281(12) 0.0521(18) 0.0360(13) -0.0019(15) 0.0144(10) -0.0103(13)
C39A 0.0278(13) 0.0412(15) 0.0358(12) 0.0009(12) 0.0131(10) 0.0001(11)
C40A 0.0238(13) 0.0302(12) 0.0268(12) 0.0014(9) 0.0080(8) -0.0004(9)
N2B 0.0247(9) 0.0209(8) 0.0280(10) 0.0014(7) 0.0100(8) -0.0020(6)
P2B 0.0447(17) 0.0313(14) 0.0255(13) -0.0002(10) -0.0005(11) -0.0047(12)
Cl3B 0.053(2) 0.032(2) 0.0386(18) -0.0077(17) 0.0110(14) -0.0018(19)
Cl4B 0.039(3) 0.054(2) 0.094(6) -0.011(3) -0.003(3) -0.0132(19)
Si2B 0.0382(16) 0.0308(14) 0.0240(14) 0.0050(11) 0.0088(11) 0.0023(12)
C41B 0.0619(5) 0.0357(4) 0.0700(5) 0.0165(3) 0.0340(4) -0.0013(3)
C42B 0.0434(14) 0.0411(14) 0.0439(18) 0.0111(13) 0.0131(13) 0.0162(11)
C22B 0.0237(9) 0.0204(8) 0.0251(12) 0.0013(8) 0.0075(8) -0.0021(7)
C23B 0.0227(9) 0.0280(9) 0.0168(13) 0.0030(8) 0.0039(9) -0.0007(7)
C24B 0.0373(13) 0.0288(11) 0.031(2) -0.0014(10) 0.0137(13) -0.0078(10)
C25B 0.0403(14) 0.0417(17) 0.0322(16) -0.0010(12) 0.0136(12) -0.0170(13)
C26B 0.0281(12) 0.0521(18) 0.0360(13) -0.0019(15) 0.0144(10) -0.0103(13)
C27B 0.0278(13) 0.0412(15) 0.0358(12) 0.0009(12) 0.0131(10) 0.0001(11)
C28B 0.0238(13) 0.0302(12) 0.0268(12) 0.0014(9) 0.0080(8) -0.0004(9)
C35B 0.0204(9) 0.0243(11) 0.0261(11) -0.0028(8) 0.0101(9) -0.0007(8)
C36B 0.0290(12) 0.0323(12) 0.0277(12) 0.0021(9) 0.0102(10) -0.0004(9)
C37B 0.0334(14) 0.0443(15) 0.0284(12) 0.0025(10) 0.0083(10) -0.0017(13)
C38B 0.0283(12) 0.0478(15) 0.0299(12) -0.0122(11) 0.0092(10) -0.0060(12)
C39B 0.0272(12) 0.0375(13) 0.0395(14) -0.0092(11) 0.0129(10) -0.0033(11)
C40B 0.0248(12) 0.0253(11) 0.0333(12) -0.0026(9) 0.0110(9) -0.0012(10)
C29 0.0263(9) 0.0224(8) 0.0383(11) 0.0035(7) 0.0059(8) -0.0010(7)
C30 0.0273(11) 0.0673(16) 0.0431(13) 0.0069(11) 0.0089(9) 0.0029(10)
C31 0.0240(11) 0.0673(17) 0.0689(18) -0.0024(14) 0.0068(11) 0.0090(11)
C32 0.0393(13) 0.0465(13) 0.0559(16) 0.0060(11) -0.0118(11) 0.0074(11)
C33 0.0479(15) 0.0663(17) 0.0384(13) 0.0065(12) -0.0025(11) -0.0010(12)
C34 0.0356(12) 0.0499(13) 0.0364(11) -0.0050(10) 0.0064(9) -0.0012(10)

#==============================================================================

# MOLECULAR GEOMETRY
 
_geom_special_details
;
 All s.u.'s (except the s.u. in the dihedral angle between two l.s. planes)
 are estimated using the full covariance matrix.  The cell s.u.'s are taken
 into account individually in the estimation of s.u.'s in distances, angles
 and torsion angles; correlations between s.u.'s in cell parameters are only
 used when they are defined by crystal symmetry.  An approximate (isotropic)
 treatment of cell s.u.'s is used for estimating s.u.'s involving l.s. planes.
;
 
loop_
 _geom_bond_atom_site_label_1
 _geom_bond_atom_site_label_2
 _geom_bond_distance
 _geom_bond_site_symmetry_2
 _geom_bond_publ_flag
N1A C1A 1.512(2) . ?
N1A P1A 1.6564(17) . ?
N1A Si1A 1.7686(17) . ?
P1A Cl2A 2.0695(9) . ?
P1A Cl1A 2.0902(15) . ?
Si1A C19A 1.849(2) . ?
Si1A C20A 1.858(3) . ?
Si1A C21A 1.887(5) . ?
C20A H20A 0.9800 . ?
C20A H20B 0.9800 . ?
C20A H20C 0.9800 . ?
C21A H21A 0.9800 . ?
C21A H21B 0.9800 . ?
C21A H21C 0.9800 . ?
C1A C14A 1.535(3) . ?
C1A C2 1.541(3) . ?
C1A C8A 1.546(3) . ?
C8A C13A 1.382(3) . ?
C8A C9A 1.394(3) . ?
C9A C10A 1.378(3) . ?
C9A H9A 0.9500 . ?
C10A C11A 1.377(4) . ?
C10A H10A 0.9500 . ?
C11A C12A 1.374(4) . ?
C11A H11A 0.9500 . ?
C12A C13A 1.387(3) . ?
C12A H12A 0.9500 . ?
C13A H13A 0.9500 . ?
C14A C15A 1.393(3) . ?
C14A C19A 1.395(3) . ?
C15A C16A 1.393(3) . ?
C15A H15A 0.9500 . ?
C16A C17A 1.371(4) . ?
C16A H16A 0.9500 . ?
C17A C18A 1.379(3) . ?
C17A H17A 0.9500 . ?
C18A C19A 1.400(3) . ?
C18A H18A 0.9500 . ?
N1B C1B 1.510(2) . ?
N1B P1B 1.6582(19) . ?
N1B Si1B 1.7681(19) . ?
P1B Cl2B 2.0690(14) . ?
P1B Cl1B 2.0897(18) . ?
Si1B C19B 1.848(2) . ?
Si1B C20B 1.858(3) . ?
Si1B C21B 1.887(5) . ?
C20B H20D 0.9800 . ?
C20B H20E 0.9800 . ?
C20B H20F 0.9800 . ?
C21B H21D 0.9800 . ?
C21B H21E 0.9800 . ?
C21B H21F 0.9800 . ?
C1B C14B 1.533(3) . ?
C1B C8B 1.546(3) . ?
C1B C2 1.583(8) . ?
C8B C13B 1.382(3) . ?
C8B C9B 1.394(3) . ?
C9B C10B 1.378(3) . ?
C9B H9B 0.9500 . ?
C10B C11B 1.377(4) . ?
C10B H10B 0.9500 . ?
C11B C12B 1.374(4) . ?
C11B H11B 0.9500 . ?
C12B C13B 1.387(3) . ?
C12B H12B 0.9500 . ?
C13B H13B 0.9500 . ?
C14B C15B 1.394(3) . ?
C14B C19B 1.394(3) . ?
C15B C16B 1.393(4) . ?
C15B H15B 0.9500 . ?
C16B C17B 1.371(4) . ?
C16B H16B 0.9500 . ?
C17B C18B 1.379(4) . ?
C17B H17B 0.9500 . ?
C18B C19B 1.400(3) . ?
C18B H18B 0.9500 . ?
C2 C7 1.378(3) . ?
C2 C3 1.386(3) . ?
C3 C4 1.382(3) . ?
C3 H3 0.9500 . ?
C4 C5 1.371(3) . ?
C4 H4 0.9500 . ?
C5 C6 1.367(3) . ?
C5 H5 0.9500 . ?
C6 C7 1.392(3) . ?
C6 H6 0.9500 . ?
C7 H7 0.9500 . ?
N2A C22A 1.520(2) . ?
N2A P2A 1.6568(17) . ?
N2A Si2A 1.7696(17) . ?
P2A Cl3A 2.0764(10) . ?
P2A Cl4A 2.0808(17) . ?
Si2A C40A 1.839(2) . ?
Si2A C41A 1.840(4) . ?
Si2A C42A 1.864(2) . ?
C41A H41A 0.9800 . ?
C41A H41B 0.9800 . ?
C41A H41C 0.9800 . ?
C42A H42A 0.9800 . ?
C42A H42B 0.9800 . ?
C42A H42C 0.9800 . ?
C22A C35A 1.533(3) . ?
C22A C23A 1.540(3) . ?
C22A C29 1.555(3) . ?
C23A C24A 1.390(3) . ?
C23A C28A 1.397(3) . ?
C24A C25A 1.384(4) . ?
C24A H24A 0.9500 . ?
C25A C26A 1.385(4) . ?
C25A H25A 0.9500 . ?
C26A C27A 1.382(4) . ?
C26A H26A 0.9500 . ?
C27A C28A 1.384(3) . ?
C27A H27A 0.9500 . ?
C28A H28A 0.9500 . ?
C35A C36A 1.384(3) . ?
C35A C40A 1.390(3) . ?
C36A C37A 1.384(3) . ?
C36A H36A 0.9500 . ?
C37A C38A 1.389(4) . ?
C37A H37A 0.9500 . ?
C38A C39A 1.385(4) . ?
C38A H38A 0.9500 . ?
C39A C40A 1.396(3) . ?
C39A H39A 0.9500 . ?
N2B C22B 1.523(2) . ?
N2B P2B 1.6555(19) . ?
N2B Si2B 1.7696(19) . ?
P2B Cl3B 2.0759(14) . ?
P2B Cl4B 2.081(2) . ?
Si2B C40B 1.840(3) . ?
Si2B C41B 1.840(4) . ?
Si2B C42B 1.864(3) . ?
C41B H41D 0.9800 . ?
C41B H41E 0.9800 . ?
C41B H41F 0.9800 . ?
C42B H42D 0.9800 . ?
C42B H42E 0.9800 . ?
C42B H42F 0.9800 . ?
C22B C29 1.496(5) . ?
C22B C35B 1.535(3) . ?
C22B C23B 1.540(3) . ?
C23B C24B 1.390(3) . ?
C23B C28B 1.398(3) . ?
C24B C25B 1.384(4) . ?
C24B H24B 0.9500 . ?
C25B C26B 1.386(4) . ?
C25B H25B 0.9500 . ?
C26B C27B 1.382(4) . ?
C26B H26B 0.9500 . ?
C27B C28B 1.384(3) . ?
C27B H27B 0.9500 . ?
C28B H28B 0.9500 . ?
C35B C36B 1.383(3) . ?
C35B C40B 1.392(3) . ?
C36B C37B 1.385(4) . ?
C36B H36B 0.9500 . ?
C37B C38B 1.389(4) . ?
C37B H37B 0.9500 . ?
C38B C39B 1.385(4) . ?
C38B H38B 0.9500 . ?
C39B C40B 1.396(3) . ?
C39B H39B 0.9500 . ?
C29 C34 1.373(3) . ?
C29 C30 1.395(3) . ?
C30 C31 1.389(3) . ?
C30 H30 0.9500 . ?
C31 C32 1.355(4) . ?
C31 H31 0.9500 . ?
C32 C33 1.381(4) . ?
C32 H32 0.9500 . ?
C33 C34 1.387(3) . ?
C33 H33 0.9500 . ?
C34 H34 0.9500 . ?
 
loop_
 _geom_angle_atom_site_label_1
 _geom_angle_atom_site_label_2
 _geom_angle_atom_site_label_3
 _geom_angle
 _geom_angle_site_symmetry_1
 _geom_angle_site_symmetry_3
 _geom_angle_publ_flag
C1A N1A P1A 114.86(12) . . ?
C1A N1A Si1A 114.21(12) . . ?
P1A N1A Si1A 130.84(10) . . ?
N1A P1A Cl2A 100.30(7) . . ?
N1A P1A Cl1A 104.28(8) . . ?
Cl2A P1A Cl1A 97.03(5) . . ?
N1A Si1A C19A 91.26(9) . . ?
N1A Si1A C20A 113.14(11) . . ?
C19A Si1A C20A 113.90(11) . . ?
N1A Si1A C21A 111.00(19) . . ?
C19A Si1A C21A 119.1(2) . . ?
C20A Si1A C21A 107.75(18) . . ?
N1A C1A C14A 104.90(15) . . ?
N1A C1A C2 108.74(14) . . ?
C14A C1A C2 110.02(16) . . ?
N1A C1A C8A 110.72(16) . . ?
C14A C1A C8A 108.18(15) . . ?
C2 C1A C8A 113.90(16) . . ?
C13A C8A C9A 118.0(2) . . ?
C13A C8A C1A 122.02(19) . . ?
C9A C8A C1A 119.92(19) . . ?
C10A C9A C8A 120.8(2) . . ?
C10A C9A H9A 119.6 . . ?
C8A C9A H9A 119.6 . . ?
C11A C10A C9A 120.7(2) . . ?
C11A C10A H10A 119.7 . . ?
C9A C10A H10A 119.7 . . ?
C12A C11A C10A 119.0(2) . . ?
C12A C11A H11A 120.5 . . ?
C10A C11A H11A 120.5 . . ?
C11A C12A C13A 120.7(2) . . ?
C11A C12A H12A 119.6 . . ?
C13A C12A H12A 119.6 . . ?
C8A C13A C12A 120.8(2) . . ?
C8A C13A H13A 119.6 . . ?
C12A C13A H13A 119.6 . . ?
C15A C14A C19A 120.1(2) . . ?
C15A C14A C1A 122.99(19) . . ?
C19A C14A C1A 116.88(18) . . ?
C14A C15A C16A 119.2(2) . . ?
C14A C15A H15A 120.4 . . ?
C16A C15A H15A 120.4 . . ?
C17A C16A C15A 121.2(2) . . ?
C17A C16A H16A 119.4 . . ?
C15A C16A H16A 119.4 . . ?
C16A C17A C18A 119.8(2) . . ?
C16A C17A H17A 120.1 . . ?
C18A C17A H17A 120.1 . . ?
C17A C18A C19A 120.5(2) . . ?
C17A C18A H18A 119.7 . . ?
C19A C18A H18A 119.7 . . ?
C14A C19A C18A 119.2(2) . . ?
C14A C19A Si1A 110.23(15) . . ?
C18A C19A Si1A 130.46(18) . . ?
C1B N1B P1B 114.66(17) . . ?
C1B N1B Si1B 114.70(15) . . ?
P1B N1B Si1B 130.41(15) . . ?
N1B P1B Cl2B 100.22(13) . . ?
N1B P1B Cl1B 104.18(14) . . ?
Cl2B P1B Cl1B 97.21(10) . . ?
N1B Si1B C19B 91.46(11) . . ?
N1B Si1B C20B 113.12(17) . . ?
C19B Si1B C20B 113.86(16) . . ?
N1B Si1B C21B 111.0(2) . . ?
C19B Si1B C21B 119.0(2) . . ?
C20B Si1B C21B 107.7(2) . . ?
Si1B C20B H20D 109.5 . . ?
Si1B C20B H20E 109.5 . . ?
H20D C20B H20E 109.5 . . ?
Si1B C20B H20F 109.5 . . ?
H20D C20B H20F 109.5 . . ?
H20E C20B H20F 109.5 . . ?
Si1B C21B H21D 109.5 . . ?
Si1B C21B H21E 109.5 . . ?
H21D C21B H21E 109.5 . . ?
Si1B C21B H21F 109.5 . . ?
H21D C21B H21F 109.5 . . ?
H21E C21B H21F 109.5 . . ?
N1B C1B C14B 105.52(18) . . ?
N1B C1B C8B 110.9(2) . . ?
C14B C1B C8B 108.3(2) . . ?
N1B C1B C2 106.2(4) . . ?
C14B C1B C2 106.6(7) . . ?
C8B C1B C2 118.5(6) . . ?
C13B C8B C9B 118.0(2) . . ?
C13B C8B C1B 122.1(2) . . ?
C9B C8B C1B 119.9(2) . . ?
C10B C9B C8B 120.8(3) . . ?
C10B C9B H9B 119.6 . . ?
C8B C9B H9B 119.6 . . ?
C11B C10B C9B 120.6(3) . . ?
C11B C10B H10B 119.7 . . ?
C9B C10B H10B 119.7 . . ?
C12B C11B C10B 119.0(3) . . ?
C12B C11B H11B 120.5 . . ?
C10B C11B H11B 120.5 . . ?
C11B C12B C13B 120.7(3) . . ?
C11B C12B H12B 119.6 . . ?
C13B C12B H12B 119.6 . . ?
C8B C13B C12B 120.7(3) . . ?
C8B C13B H13B 119.6 . . ?
C12B C13B H13B 119.6 . . ?
C15B C14B C19B 119.9(2) . . ?
C15B C14B C1B 122.8(2) . . ?
C19B C14B C1B 117.2(2) . . ?
C16B C15B C14B 119.1(3) . . ?
C16B C15B H15B 120.4 . . ?
C14B C15B H15B 120.4 . . ?
C17B C16B C15B 121.1(3) . . ?
C17B C16B H16B 119.5 . . ?
C15B C16B H16B 119.5 . . ?
C16B C17B C18B 119.6(3) . . ?
C16B C17B H17B 120.2 . . ?
C18B C17B H17B 120.2 . . ?
C17B C18B C19B 120.5(3) . . ?
C17B C18B H18B 119.8 . . ?
C19B C18B H18B 119.8 . . ?
C14B C19B C18B 119.2(2) . . ?
C14B C19B Si1B 110.36(17) . . ?
C18B C19B Si1B 130.3(2) . . ?
C7 C2 C3 117.93(19) . . ?
C7 C2 C1A 121.95(18) . . ?
C3 C2 C1A 119.98(17) . . ?
C7 C2 C1B 132.3(3) . . ?
C3 C2 C1B 109.7(2) . . ?
C1A C2 C1B 12.3(3) . . ?
C4 C3 C2 121.4(2) . . ?
C4 C3 H3 119.3 . . ?
C2 C3 H3 119.3 . . ?
C5 C4 C3 120.1(2) . . ?
C5 C4 H4 120.0 . . ?
C3 C4 H4 120.0 . . ?
C6 C5 C4 119.4(2) . . ?
C6 C5 H5 120.3 . . ?
C4 C5 H5 120.3 . . ?
C5 C6 C7 120.7(2) . . ?
C5 C6 H6 119.7 . . ?
C7 C6 H6 119.7 . . ?
C2 C7 C6 120.6(2) . . ?
C2 C7 H7 119.7 . . ?
C6 C7 H7 119.7 . . ?
C22A N2A P2A 114.14(13) . . ?
C22A N2A Si2A 114.28(12) . . ?
P2A N2A Si2A 131.35(10) . . ?
N2A P2A Cl3A 100.83(7) . . ?
N2A P2A Cl4A 103.58(8) . . ?
Cl3A P2A Cl4A 97.22(6) . . ?
N2A Si2A C40A 92.00(9) . . ?
N2A Si2A C41A 114.13(17) . . ?
C40A Si2A C41A 115.14(14) . . ?
N2A Si2A C42A 113.82(10) . . ?
C40A Si2A C42A 111.40(12) . . ?
C41A Si2A C42A 109.53(16) . . ?
N2A C22A C35A 105.66(16) . . ?
N2A C22A C23A 110.47(14) . . ?
C35A C22A C23A 107.90(15) . . ?
N2A C22A C29 107.31(15) . . ?
C35A C22A C29 109.78(16) . . ?
C23A C22A C29 115.30(16) . . ?
C24A C23A C28A 118.2(2) . . ?
C24A C23A C22A 120.79(17) . . ?
C28A C23A C22A 120.66(18) . . ?
C25A C24A C23A 121.0(2) . . ?
C25A C24A H24A 119.5 . . ?
C23A C24A H24A 119.5 . . ?
C24A C25A C26A 120.2(2) . . ?
C24A C25A H25A 119.9 . . ?
C26A C25A H25A 119.9 . . ?
C27A C26A C25A 119.4(2) . . ?
C27A C26A H26A 120.3 . . ?
C25A C26A H26A 120.3 . . ?
C26A C27A C28A 120.5(2) . . ?
C26A C27A H27A 119.8 . . ?
C28A C27A H27A 119.8 . . ?
C27A C28A C23A 120.6(2) . . ?
C27A C28A H28A 119.7 . . ?
C23A C28A H28A 119.7 . . ?
C36A C35A C40A 120.5(2) . . ?
C36A C35A C22A 122.0(2) . . ?
C40A C35A C22A 117.48(19) . . ?
C35A C36A C37A 120.0(3) . . ?
C35A C36A H36A 120.0 . . ?
C37A C36A H36A 120.0 . . ?
C36A C37A C38A 120.5(3) . . ?
C36A C37A H37A 119.8 . . ?
C38A C37A H37A 119.8 . . ?
C39A C38A C37A 119.2(2) . . ?
C39A C38A H38A 120.4 . . ?
C37A C38A H38A 120.4 . . ?
C38A C39A C40A 121.0(2) . . ?
C38A C39A H39A 119.5 . . ?
C40A C39A H39A 119.5 . . ?
C35A C40A C39A 118.9(2) . . ?
C35A C40A Si2A 110.51(16) . . ?
C39A C40A Si2A 130.60(19) . . ?
C22B N2B P2B 114.23(16) . . ?
C22B N2B Si2B 113.77(14) . . ?
P2B N2B Si2B 131.92(14) . . ?
N2B P2B Cl3B 100.94(12) . . ?
N2B P2B Cl4B 103.56(14) . . ?
Cl3B P2B Cl4B 97.25(10) . . ?
N2B Si2B C40B 91.87(11) . . ?
N2B Si2B C41B 114.2(2) . . ?
C40B Si2B C41B 115.06(18) . . ?
N2B Si2B C42B 113.83(15) . . ?
C40B Si2B C42B 111.52(16) . . ?
C41B Si2B C42B 109.56(19) . . ?
Si2B C41B H41D 109.5 . . ?
Si2B C41B H41E 109.5 . . ?
H41D C41B H41E 109.5 . . ?
Si2B C41B H41F 109.5 . . ?
H41D C41B H41F 109.5 . . ?
H41E C41B H41F 109.5 . . ?
Si2B C42B H42D 109.5 . . ?
Si2B C42B H42E 109.5 . . ?
H42D C42B H42E 109.5 . . ?
Si2B C42B H42F 109.5 . . ?
H42D C42B H42F 109.5 . . ?
H42E C42B H42F 109.5 . . ?
C29 C22B N2B 112.5(2) . . ?
C29 C22B C35B 104.4(3) . . ?
N2B C22B C35B 104.91(19) . . ?
C29 C22B C23B 116.3(3) . . ?
N2B C22B C23B 110.09(18) . . ?
C35B C22B C23B 107.7(2) . . ?
C24B C23B C28B 118.2(3) . . ?
C24B C23B C22B 120.7(2) . . ?
C28B C23B C22B 120.5(2) . . ?
C25B C24B C23B 120.9(3) . . ?
C25B C24B H24B 119.5 . . ?
C23B C24B H24B 119.5 . . ?
C24B C25B C26B 120.1(3) . . ?
C24B C25B H25B 120.0 . . ?
C26B C25B H25B 120.0 . . ?
C27B C26B C25B 119.4(3) . . ?
C27B C26B H26B 120.3 . . ?
C25B C26B H26B 120.3 . . ?
C26B C27B C28B 120.5(3) . . ?
C26B C27B H27B 119.7 . . ?
C28B C27B H27B 119.7 . . ?
C27B C28B C23B 120.5(3) . . ?
C27B C28B H28B 119.7 . . ?
C23B C28B H28B 119.7 . . ?
C36B C35B C40B 120.7(2) . . ?
C36B C35B C22B 122.3(2) . . ?
C40B C35B C22B 117.0(2) . . ?
C35B C36B C37B 120.0(3) . . ?
C35B C36B H36B 120.0 . . ?
C37B C36B H36B 120.0 . . ?
C36B C37B C38B 120.3(3) . . ?
C36B C37B H37B 119.8 . . ?
C38B C37B H37B 119.8 . . ?
C39B C38B C37B 119.2(3) . . ?
C39B C38B H38B 120.4 . . ?
C37B C38B H38B 120.4 . . ?
C38B C39B C40B 121.1(3) . . ?
C38B C39B H39B 119.5 . . ?
C40B C39B H39B 119.5 . . ?
C35B C40B C39B 118.6(2) . . ?
C35B C40B Si2B 110.24(19) . . ?
C39B C40B Si2B 130.6(2) . . ?
C34 C29 C30 118.1(2) . . ?
C34 C29 C22B 107.6(2) . . ?
C30 C29 C22B 133.8(2) . . ?
C34 C29 C22A 123.26(18) . . ?
C30 C29 C22A 118.61(18) . . ?
C22B C29 C22A 16.04(19) . . ?
C31 C30 C29 120.4(2) . . ?
C31 C30 H30 119.8 . . ?
C29 C30 H30 119.8 . . ?
C32 C31 C30 121.0(2) . . ?
C32 C31 H31 119.5 . . ?
C30 C31 H31 119.5 . . ?
C31 C32 C33 119.2(2) . . ?
C31 C32 H32 120.4 . . ?
C33 C32 H32 120.4 . . ?
C32 C33 C34 120.3(2) . . ?
C32 C33 H33 119.8 . . ?
C34 C33 H33 119.8 . . ?
C29 C34 C33 121.0(2) . . ?
C29 C34 H34 119.5 . . ?
C33 C34 H34 119.5 . . ?
 
loop_
 _geom_torsion_atom_site_label_1
 _geom_torsion_atom_site_label_2
 _geom_torsion_atom_site_label_3
 _geom_torsion_atom_site_label_4
 _geom_torsion
 _geom_torsion_site_symmetry_1
 _geom_torsion_site_symmetry_2
 _geom_torsion_site_symmetry_3
 _geom_torsion_site_symmetry_4
 _geom_torsion_publ_flag
C1A N1A P1A Cl2A -148.37(12) . . . . ?
Si1A N1A P1A Cl2A 35.47(14) . . . . ?
C1A N1A P1A Cl1A 111.58(13) . . . . ?
Si1A N1A P1A Cl1A -64.59(14) . . . . ?
C1A N1A Si1A C19A -12.24(14) . . . . ?
P1A N1A Si1A C19A 163.95(14) . . . . ?
C1A N1A Si1A C20A 104.51(15) . . . . ?
P1A N1A Si1A C20A -79.30(17) . . . . ?
C1A N1A Si1A C21A -134.2(2) . . . . ?
P1A N1A Si1A C21A 42.0(3) . . . . ?
P1A N1A C1A C14A -160.05(14) . . . . ?
Si1A N1A C1A C14A 16.77(19) . . . . ?
P1A N1A C1A C2 -42.38(19) . . . . ?
Si1A N1A C1A C2 134.44(13) . . . . ?
P1A N1A C1A C8A 83.47(17) . . . . ?
Si1A N1A C1A C8A -99.71(17) . . . . ?
N1A C1A C8A C13A 3.2(3) . . . . ?
C14A C1A C8A C13A -111.3(2) . . . . ?
C2 C1A C8A C13A 126.1(2) . . . . ?
N1A C1A C8A C9A -179.4(3) . . . . ?
C14A C1A C8A C9A 66.2(3) . . . . ?
C2 C1A C8A C9A -56.5(3) . . . . ?
C13A C8A C9A C10A -1.1(5) . . . . ?
C1A C8A C9A C10A -178.7(3) . . . . ?
C8A C9A C10A C11A 2.2(5) . . . . ?
C9A C10A C11A C12A -1.7(4) . . . . ?
C10A C11A C12A C13A 0.2(4) . . . . ?
C9A C8A C13A C12A -0.4(4) . . . . ?
C1A C8A C13A C12A 177.1(2) . . . . ?
C11A C12A C13A C8A 0.8(4) . . . . ?
N1A C1A C14A C15A 167.1(3) . . . . ?
C2 C1A C14A C15A 50.3(3) . . . . ?
C8A C1A C14A C15A -74.7(3) . . . . ?
N1A C1A C14A C19A -14.7(3) . . . . ?
C2 C1A C14A C19A -131.4(2) . . . . ?
C8A C1A C14A C19A 103.6(2) . . . . ?
C19A C14A C15A C16A -1.6(5) . . . . ?
C1A C14A C15A C16A 176.7(3) . . . . ?
C14A C15A C16A C17A 0.6(5) . . . . ?
C15A C16A C17A C18A 0.2(4) . . . . ?
C16A C17A C18A C19A -0.1(4) . . . . ?
C15A C14A C19A C18A 1.7(4) . . . . ?
C1A C14A C19A C18A -176.7(2) . . . . ?
C15A C14A C19A Si1A -175.2(3) . . . . ?
C1A C14A C19A Si1A 6.5(3) . . . . ?
C17A C18A C19A C14A -0.8(3) . . . . ?
C17A C18A C19A Si1A 175.25(18) . . . . ?
N1A Si1A C19A C14A 3.23(17) . . . . ?
C20A Si1A C19A C14A -112.85(19) . . . . ?
C21A Si1A C19A C14A 118.2(2) . . . . ?
N1A Si1A C19A C18A -173.1(2) . . . . ?
C20A Si1A C19A C18A 70.8(2) . . . . ?
C21A Si1A C19A C18A -58.1(3) . . . . ?
C1B N1B P1B Cl2B 135.1(5) . . . . ?
Si1B N1B P1B Cl2B -38.9(8) . . . . ?
C1B N1B P1B Cl1B -124.7(5) . . . . ?
Si1B N1B P1B Cl1B 61.3(8) . . . . ?
C1B N1B Si1B C19B 6.9(7) . . . . ?
P1B N1B Si1B C19B -179.0(8) . . . . ?
C1B N1B Si1B C20B -109.9(7) . . . . ?
P1B N1B Si1B C20B 64.2(8) . . . . ?
C1B N1B Si1B C21B 128.9(7) . . . . ?
P1B N1B Si1B C21B -57.0(9) . . . . ?
P1B N1B C1B C14B 175.4(10) . . . . ?
Si1B N1B C1B C14B -9.5(7) . . . . ?
P1B N1B C1B C8B -67.5(10) . . . . ?
Si1B N1B C1B C8B 107.6(7) . . . . ?
P1B N1B C1B C2 62.5(5) . . . . ?
Si1B N1B C1B C2 -122.4(5) . . . . ?
N1B C1B C8B C13B -19(2) . . . . ?
C14B C1B C8B C13B 96.3(19) . . . . ?
C2 C1B C8B C13B -142.3(15) . . . . ?
N1B C1B C8B C9B 162(3) . . . . ?
C14B C1B C8B C9B -83(3) . . . . ?
C2 C1B C8B C9B 39(3) . . . . ?
C13B C8B C9B C10B 1(5) . . . . ?
C1B C8B C9B C10B 180(3) . . . . ?
C8B C9B C10B C11B -3(5) . . . . ?
C9B C10B C11B C12B 3(4) . . . . ?
C10B C11B C12B C13B 0(4) . . . . ?
C9B C8B C13B C12B 2(4) . . . . ?
C1B C8B C13B C12B -177.1(19) . . . . ?
C11B C12B C13B C8B -2(4) . . . . ?
N1B C1B C14B C15B -175(2) . . . . ?
C8B C1B C14B C15B 66(2) . . . . ?
C2 C1B C14B C15B -62(2) . . . . ?
N1B C1B C14B C19B 8.3(16) . . . . ?
C8B C1B C14B C19B -110.5(16) . . . . ?
C2 C1B C14B C19B 121.0(15) . . . . ?
C19B C14B C15B C16B 3(4) . . . . ?
C1B C14B C15B C16B -173(2) . . . . ?
C14B C15B C16B C17B -8(4) . . . . ?
C15B C16B C17B C18B 5(4) . . . . ?
C16B C17B C18B C19B 2(4) . . . . ?
C15B C14B C19B C18B 3(3) . . . . ?
C1B C14B C19B C18B 180.0(17) . . . . ?
C15B C14B C19B Si1B 180(2) . . . . ?
C1B C14B C19B Si1B -3.7(19) . . . . ?
C17B C18B C19B C14B -6(3) . . . . ?
C17B C18B C19B Si1B 178.3(18) . . . . ?
N1B Si1B C19B C14B -1.8(14) . . . . ?
C20B Si1B C19B C14B 114.3(14) . . . . ?
C21B Si1B C19B C14B -116.9(14) . . . . ?
N1B Si1B C19B C18B 174.0(19) . . . . ?
C20B Si1B C19B C18B -69.9(19) . . . . ?
C21B Si1B C19B C18B 58.8(19) . . . . ?
N1A C1A C2 C7 111.2(2) . . . . ?
C14A C1A C2 C7 -134.5(2) . . . . ?
C8A C1A C2 C7 -12.8(3) . . . . ?
N1A C1A C2 C3 -64.4(2) . . . . ?
C14A C1A C2 C3 50.0(2) . . . . ?
C8A C1A C2 C3 171.65(19) . . . . ?
N1A C1A C2 C1B -99.1(8) . . . . ?
C14A C1A C2 C1B 15.3(7) . . . . ?
C8A C1A C2 C1B 136.9(7) . . . . ?
N1B C1B C2 C7 114.3(3) . . . . ?
C14B C1B C2 C7 2.2(5) . . . . ?
C8B C1B C2 C7 -120.2(7) . . . . ?
N1B C1B C2 C3 -69.4(3) . . . . ?
C14B C1B C2 C3 178.4(4) . . . . ?
C8B C1B C2 C3 56.1(7) . . . . ?
N1B C1B C2 C1A 79.0(7) . . . . ?
C14B C1B C2 C1A -33.2(8) . . . . ?
C8B C1B C2 C1A -155.5(11) . . . . ?
C7 C2 C3 C4 -0.3(3) . . . . ?
C1A C2 C3 C4 175.4(2) . . . . ?
C1B C2 C3 C4 -177.2(3) . . . . ?
C2 C3 C4 C5 1.4(4) . . . . ?
C3 C4 C5 C6 -1.2(4) . . . . ?
C4 C5 C6 C7 -0.2(4) . . . . ?
C3 C2 C7 C6 -1.0(3) . . . . ?
C1A C2 C7 C6 -176.7(2) . . . . ?
C1B C2 C7 C6 175.0(3) . . . . ?
C5 C6 C7 C2 1.3(4) . . . . ?
C22A N2A P2A Cl3A 145.44(13) . . . . ?
Si2A N2A P2A Cl3A -40.44(15) . . . . ?
C22A N2A P2A Cl4A -114.31(14) . . . . ?
Si2A N2A P2A Cl4A 59.81(16) . . . . ?
C22A N2A Si2A C40A 0.72(15) . . . . ?
P2A N2A Si2A C40A -173.39(15) . . . . ?
C22A N2A Si2A C41A 119.50(18) . . . . ?
P2A N2A Si2A C41A -54.61(19) . . . . ?
C22A N2A Si2A C42A -113.76(16) . . . . ?
P2A N2A Si2A C42A 72.12(18) . . . . ?
P2A N2A C22A C35A 175.82(13) . . . . ?
Si2A N2A C22A C35A 0.65(19) . . . . ?
P2A N2A C22A C23A -67.74(19) . . . . ?
Si2A N2A C22A C23A 117.10(16) . . . . ?
P2A N2A C22A C29 58.71(18) . . . . ?
Si2A N2A C22A C29 -116.45(15) . . . . ?
N2A C22A C23A C24A -26.2(3) . . . . ?
C35A C22A C23A C24A 88.8(2) . . . . ?
C29 C22A C23A C24A -148.1(2) . . . . ?
N2A C22A C23A C28A 160.2(2) . . . . ?
C35A C22A C23A C28A -84.7(3) . . . . ?
C29 C22A C23A C28A 38.4(3) . . . . ?
C28A C23A C24A C25A 0.1(4) . . . . ?
C22A C23A C24A C25A -173.6(2) . . . . ?
C23A C24A C25A C26A 0.3(4) . . . . ?
C24A C25A C26A C27A -0.5(4) . . . . ?
C25A C26A C27A C28A 0.3(4) . . . . ?
C26A C27A C28A C23A 0.1(4) . . . . ?
C24A C23A C28A C27A -0.3(4) . . . . ?
C22A C23A C28A C27A 173.4(2) . . . . ?
N2A C22A C35A C36A 179.0(2) . . . . ?
C23A C22A C35A C36A 60.9(3) . . . . ?
C29 C22A C35A C36A -65.5(3) . . . . ?
N2A C22A C35A C40A -2.4(2) . . . . ?
C23A C22A C35A C40A -120.5(2) . . . . ?
C29 C22A C35A C40A 113.1(2) . . . . ?
C40A C35A C36A C37A 0.6(4) . . . . ?
C22A C35A C36A C37A 179.1(2) . . . . ?
C35A C36A C37A C38A -0.6(4) . . . . ?
C36A C37A C38A C39A 0.0(4) . . . . ?
C37A C38A C39A C40A 0.7(4) . . . . ?
C36A C35A C40A C39A 0.1(4) . . . . ?
C22A C35A C40A C39A -178.5(2) . . . . ?
C36A C35A C40A Si2A -178.4(2) . . . . ?
C22A C35A C40A Si2A 3.0(3) . . . . ?
C38A C39A C40A C35A -0.8(4) . . . . ?
C38A C39A C40A Si2A 177.4(2) . . . . ?
N2A Si2A C40A C35A -2.06(18) . . . . ?
C41A Si2A C40A C35A -120.0(2) . . . . ?
C42A Si2A C40A C35A 114.53(19) . . . . ?
N2A Si2A C40A C39A 179.6(3) . . . . ?
C41A Si2A C40A C39A 61.7(3) . . . . ?
C42A Si2A C40A C39A -63.8(3) . . . . ?
C22B N2B P2B Cl3B -144.5(3) . . . . ?
Si2B N2B P2B Cl3B 39.0(4) . . . . ?
C22B N2B P2B Cl4B 115.2(3) . . . . ?
Si2B N2B P2B Cl4B -61.3(4) . . . . ?
C22B N2B Si2B C40B -8.7(4) . . . . ?
P2B N2B Si2B C40B 167.7(4) . . . . ?
C22B N2B Si2B C41B -127.4(4) . . . . ?
P2B N2B Si2B C41B 49.1(5) . . . . ?
C22B N2B Si2B C42B 105.8(4) . . . . ?
P2B N2B Si2B C42B -77.7(4) . . . . ?
P2B N2B C22B C29 -49.6(3) . . . . ?
Si2B N2B C22B C29 127.5(3) . . . . ?
P2B N2B C22B C35B -162.5(4) . . . . ?
Si2B N2B C22B C35B 14.6(4) . . . . ?
P2B N2B C22B C23B 81.9(5) . . . . ?
Si2B N2B C22B C23B -101.0(4) . . . . ?
C29 C22B C23B C24B -50.2(11) . . . . ?
N2B C22B C23B C24B -179.6(10) . . . . ?
C35B C22B C23B C24B 66.6(10) . . . . ?
C29 C22B C23B C28B 138.6(8) . . . . ?
N2B C22B C23B C28B 9.2(9) . . . . ?
C35B C22B C23B C28B -104.6(9) . . . . ?
C28B C23B C24B C25B -7(2) . . . . ?
C22B C23B C24B C25B -178.4(12) . . . . ?
C23B C24B C25B C26B 6(2) . . . . ?
C24B C25B C26B C27B -3(2) . . . . ?
C25B C26B C27B C28B 0(2) . . . . ?
C26B C27B C28B C23B -1(2) . . . . ?
C24B C23B C28B C27B 4.4(17) . . . . ?
C22B C23B C28B C27B 175.8(10) . . . . ?
C29 C22B C35B C36B 48.5(11) . . . . ?
N2B C22B C35B C36B 166.9(10) . . . . ?
C23B C22B C35B C36B -75.8(10) . . . . ?
C29 C22B C35B C40B -134.2(6) . . . . ?
N2B C22B C35B C40B -15.7(7) . . . . ?
C23B C22B C35B C40B 101.5(7) . . . . ?
C40B C35B C36B C37B -2.2(19) . . . . ?
C22B C35B C36B C37B 175.0(10) . . . . ?
C35B C36B C37B C38B 1(2) . . . . ?
C36B C37B C38B C39B 2(2) . . . . ?
C37B C38B C39B C40B -3.9(19) . . . . ?
C36B C35B C40B C39B 0.0(14) . . . . ?
C22B C35B C40B C39B -177.4(7) . . . . ?
C36B C35B C40B Si2B -172.6(10) . . . . ?
C22B C35B C40B Si2B 10.1(8) . . . . ?
C38B C39B C40B C35B 3.1(14) . . . . ?
C38B C39B C40B Si2B 173.8(9) . . . . ?
N2B Si2B C40B C35B -0.6(6) . . . . ?
C41B Si2B C40B C35B 117.2(6) . . . . ?
C42B Si2B C40B C35B -117.2(6) . . . . ?
N2B Si2B C40B C39B -172.0(8) . . . . ?
C41B Si2B C40B C39B -54.1(9) . . . . ?
C42B Si2B C40B C39B 71.4(8) . . . . ?
N2B C22B C29 C34 90.0(3) . . . . ?
C35B C22B C29 C34 -156.8(3) . . . . ?
C23B C22B C29 C34 -38.2(4) . . . . ?
N2B C22B C29 C30 -81.1(3) . . . . ?
C35B C22B C29 C30 32.1(4) . . . . ?
C23B C22B C29 C30 150.6(4) . . . . ?
N2B C22B C29 C22A -102.3(5) . . . . ?
C35B C22B C29 C22A 10.9(4) . . . . ?
C23B C22B C29 C22A 129.5(5) . . . . ?
N2A C22A C29 C34 90.1(2) . . . . ?
C35A C22A C29 C34 -24.3(3) . . . . ?
C23A C22A C29 C34 -146.4(2) . . . . ?
N2A C22A C29 C30 -86.7(2) . . . . ?
C35A C22A C29 C30 158.92(19) . . . . ?
C23A C22A C29 C30 36.8(3) . . . . ?
N2A C22A C29 C22B 76.0(4) . . . . ?
C35A C22A C29 C22B -38.3(5) . . . . ?
C23A C22A C29 C22B -160.4(5) . . . . ?
C34 C29 C30 C31 -2.4(3) . . . . ?
C22B C29 C30 C31 168.1(3) . . . . ?
C22A C29 C30 C31 174.6(2) . . . . ?
C29 C30 C31 C32 2.1(4) . . . . ?
C30 C31 C32 C33 -0.4(4) . . . . ?
C31 C32 C33 C34 -1.0(4) . . . . ?
C30 C29 C34 C33 1.0(3) . . . . ?
C22B C29 C34 C33 -171.7(2) . . . . ?
C22A C29 C34 C33 -175.8(2) . . . . ?
C32 C33 C34 C29 0.6(4) . . . . ?
 
_diffrn_measured_fraction_theta_max    0.999
_diffrn_reflns_theta_full              29.00
_diffrn_measured_fraction_theta_full   0.999
_refine_diff_density_max    0.446
_refine_diff_density_min   -0.314
_refine_diff_density_rms    0.051

#=============================================================================
 
data_av223_TerNtmsPCl2

_audit_author_name                'Villinger, A.' 
_audit_creation_method            SHELXL-97 

#==============================================================================

# CHEMICAL DATA

_chemical_name_systematic
;
N-[2,6-bis(2,4,6-trimethylphenyl)phenyl]-N-(trimethylsilyl)amino-
dichlorophosphane
;
_chemical_name_common             ?
_chemical_melting_point           ?
_chemical_formula_moiety          'C27 H34 Cl2 N P Si'
_chemical_formula_sum
 'C27 H34 Cl2 N P Si'
_chemical_formula_weight          502.51
 
loop_
 _atom_type_symbol
 _atom_type_description
 _atom_type_scat_dispersion_real
 _atom_type_scat_dispersion_imag
 _atom_type_scat_source
 'C'  'C'   0.0033   0.0016
 'International Tables Vol C Tables 4.2.6.8 and 6.1.1.4'
 'H'  'H'   0.0000   0.0000
 'International Tables Vol C Tables 4.2.6.8 and 6.1.1.4'
 'N'  'N'   0.0061   0.0033
 'International Tables Vol C Tables 4.2.6.8 and 6.1.1.4'
 'Si'  'Si'   0.0817   0.0704
 'International Tables Vol C Tables 4.2.6.8 and 6.1.1.4'
 'P'  'P'   0.1023   0.0942
 'International Tables Vol C Tables 4.2.6.8 and 6.1.1.4'
 'Cl'  'Cl'   0.1484   0.1585
 'International Tables Vol C Tables 4.2.6.8 and 6.1.1.4'
 
#==============================================================================

# CRYSTAL DATA
 
_symmetry_cell_setting            orthorhombic
_symmetry_space_group_name_H-M    'P b c a'
_symmetry_space_group_name_Hall   '-P 2ac 2ab'
_symmetry_Int_Tables_number       61
 
loop_
 _symmetry_equiv_pos_as_xyz
 'x, y, z'
 '-x+1/2, -y, z+1/2'
 '-x, y+1/2, -z+1/2'
 'x+1/2, -y+1/2, -z'
 '-x, -y, -z'
 'x-1/2, y, -z-1/2'
 'x, -y-1/2, z-1/2'
 '-x-1/2, y-1/2, z'
 
_cell_length_a                    16.1703(5)
_cell_length_b                    17.8854(5)
_cell_length_c                    18.3110(5)
_cell_angle_alpha                 90.00
_cell_angle_beta                  90.00
_cell_angle_gamma                 90.00
_cell_volume                      5295.8(3)
_cell_formula_units_Z             8
_cell_measurement_temperature     173(2)
_cell_measurement_reflns_used     8443
_cell_measurement_theta_min       5.529
_cell_measurement_theta_max       68.751
 
_exptl_crystal_description        block
_exptl_crystal_colour             colourless
_exptl_crystal_size_max           0.47
_exptl_crystal_size_mid           0.40
_exptl_crystal_size_min           0.27
_exptl_crystal_density_meas       ?
_exptl_crystal_density_diffrn     1.261
_exptl_crystal_density_method     'not measured'
_exptl_crystal_F_000              2128
_exptl_absorpt_coefficient_mu     0.367
_exptl_absorpt_correction_type    multi-scan
_exptl_absorpt_correction_T_min   0.8465
_exptl_absorpt_correction_T_max   0.9075
_exptl_absorpt_process_details    '(SADABS; Sheldrick, 2004)'

#==============================================================================

# EXPERIMENTAL DATA
 
_exptl_special_details
;
 ?
;
 
_diffrn_ambient_temperature       173(2)
_diffrn_radiation_wavelength      0.71073
_diffrn_radiation_type            MoK\a
_diffrn_radiation_source          'sealed tube'
_diffrn_radiation_monochromator   graphite
_diffrn_measurement_device_type   'Bruker Apex Kappa II-CCD-diffractometer'
_diffrn_measurement_method        'phi and omega scans'
_diffrn_detector_area_resol_mean  ?
_diffrn_standards_number          ?
_diffrn_standards_interval_count  ?
_diffrn_standards_interval_time   ?
_diffrn_standards_decay_%         ?
_diffrn_reflns_number             96783
_diffrn_reflns_av_R_equivalents   0.0341
_diffrn_reflns_av_sigmaI/netI     0.0245
_diffrn_reflns_limit_h_min        -25
_diffrn_reflns_limit_h_max        26
_diffrn_reflns_limit_k_min        -28
_diffrn_reflns_limit_k_max        14
_diffrn_reflns_limit_l_min        -29
_diffrn_reflns_limit_l_max        27
_diffrn_reflns_theta_min          2.22
_diffrn_reflns_theta_max          35.34
_reflns_number_total              11924
_reflns_number_gt                 8935
_reflns_threshold_expression      >2\s(I)
 
_computing_data_collection        'Bruker Apex V7.51A'
_computing_cell_refinement        'Bruker Apex V7.51A'
_computing_data_reduction         'Bruker SAINT'
_computing_structure_solution     'SHELXS-97 (Sheldrick, 1997)'
_computing_structure_refinement   'SHELXL-97 (Sheldrick, 1997)'
_computing_molecular_graphics     'ORTEP-3v2.01 (Farrugia, 1997)' 
_computing_publication_material   'SHELXL-97'

#==============================================================================

# REFINEMENT DATA 

_refine_special_details
;
 All H atoms were positioned geometrically and refined using a riding model, 
 with C---H = 0.98 (methyl groups), 0.99\%A (methylene groups), 
 1.00\%A (methine groups) or 0.95 \%A (aryl CH) and with <i>U</i>~iso~(H) = 
 1.5 times <i>U</i>~eq~(C) (methyl groups) or with <i>U</i>~iso~(H) = 1.2 times 
 <i>U</i>~eq~(C) (methylene  groups, aryl CH, methine groups). Torsion angles 
 of all methyl groups were allowed to refine.
 
 Refinement of F^2^ against ALL reflections.  The weighted R-factor wR and
 goodness of fit S are based on F^2^, conventional R-factors R are based
 on F, with F set to zero for negative F^2^. The threshold expression of
 F^2^ > 2\s(F^2^) is used only for calculating R-factors(gt) etc. and is
 not relevant to the choice of reflections for refinement.  R-factors based
 on F^2^ are statistically about twice as large as those based on F, and R-
 factors based on ALL data will be even larger.
;
 
_refine_ls_structure_factor_coef  Fsqd
_refine_ls_matrix_type            full
_refine_ls_weighting_scheme       calc
_refine_ls_weighting_details
 'calc w=1/[\s^2^(Fo^2^)+(0.0498P)^2^+1.5864P] where P=(Fo^2^+2Fc^2^)/3'
_atom_sites_solution_primary      direct
_atom_sites_solution_secondary    difmap
_atom_sites_solution_hydrogens    geom
_refine_ls_hydrogen_treatment     constr
_refine_ls_extinction_method      none
_refine_ls_extinction_coef        ?
_refine_ls_number_reflns          11924
_refine_ls_number_parameters      298
_refine_ls_number_restraints      0
_refine_ls_R_factor_all           0.0597
_refine_ls_R_factor_gt            0.0379
_refine_ls_wR_factor_ref          0.1082
_refine_ls_wR_factor_gt           0.0949
_refine_ls_goodness_of_fit_ref    1.036
_refine_ls_restrained_S_all       1.036
_refine_ls_shift/su_max           0.002
_refine_ls_shift/su_mean          0.000

#==============================================================================

# ATOMIC COORDINATES AND DISPLACEMENT PARAMETERS
 
loop_
 _atom_site_label
 _atom_site_type_symbol
 _atom_site_fract_x
 _atom_site_fract_y
 _atom_site_fract_z
 _atom_site_U_iso_or_equiv
 _atom_site_adp_type
 _atom_site_occupancy
 _atom_site_symmetry_multiplicity
 _atom_site_calc_flag
 _atom_site_refinement_flags
 _atom_site_disorder_assembly
 _atom_site_disorder_group
P P 0.043330(18) 0.172248(15) 0.603876(15) 0.02191(6) Uani 1 1 d . . .
Si Si -0.02392(2) 0.277134(16) 0.726628(15) 0.02099(6) Uani 1 1 d . . .
Cl2 Cl 0.01223(2) 0.077167(15) 0.664592(16) 0.03189(7) Uani 1 1 d . . .
Cl1 Cl 0.155370(19) 0.192750(19) 0.658600(19) 0.03624(7) Uani 1 1 d . . .
N N -0.01581(5) 0.24281(4) 0.63386(4) 0.01757(14) Uani 1 1 d . . .
C9 C -0.04471(6) 0.35165(5) 0.55189(5) 0.01775(16) Uani 1 1 d . . .
C4 C -0.06186(6) 0.27708(5) 0.57352(5) 0.01625(15) Uani 1 1 d . . .
C11 C -0.13808(6) 0.15355(5) 0.54913(5) 0.01942(17) Uani 1 1 d . . .
C22 C 0.01828(7) 0.45872(5) 0.62517(6) 0.02189(18) Uani 1 1 d . . .
C5 C -0.12184(6) 0.23517(5) 0.53534(5) 0.01811(16) Uani 1 1 d . . .
C17 C 0.02753(6) 0.39496(5) 0.58059(5) 0.01864(16) Uani 1 1 d . . .
C12 C -0.10471(7) 0.09993(6) 0.50077(6) 0.02175(18) Uani 1 1 d . . .
C6 C -0.16629(6) 0.26957(6) 0.47890(6) 0.02249(18) Uani 1 1 d . . .
H6 H -0.2062 0.2414 0.4526 0.027 Uiso 1 1 calc R . .
C7 C -0.15332(7) 0.34394(6) 0.46054(6) 0.02436(19) Uani 1 1 d . . .
H7 H -0.1858 0.3670 0.4236 0.029 Uiso 1 1 calc R . .
C18 C 0.10733(6) 0.37416(6) 0.55668(6) 0.02151(18) Uani 1 1 d . . .
C8 C -0.09244(7) 0.38437(6) 0.49671(6) 0.02186(18) Uani 1 1 d . . .
H8 H -0.0830 0.4351 0.4838 0.026 Uiso 1 1 calc R . .
C16 C -0.19059(7) 0.13015(6) 0.60599(6) 0.02372(19) Uani 1 1 d . . .
C19 C 0.17622(7) 0.41123(6) 0.58502(7) 0.0263(2) Uani 1 1 d . . .
H19 H 0.2299 0.3969 0.5692 0.032 Uiso 1 1 calc R . .
C26 C 0.11949(7) 0.31692(6) 0.49681(7) 0.0276(2) Uani 1 1 d . . .
H26A H 0.1743 0.3235 0.4749 0.041 Uiso 1 1 calc R . .
H26B H 0.0769 0.3237 0.4593 0.041 Uiso 1 1 calc R . .
H26C H 0.1151 0.2665 0.5175 0.041 Uiso 1 1 calc R . .
C20 C 0.16830(7) 0.46877(6) 0.63586(7) 0.0263(2) Uani 1 1 d . . .
C13 C -0.12154(7) 0.02405(6) 0.51254(6) 0.0265(2) Uani 1 1 d . . .
H13 H -0.0980 -0.0120 0.4807 0.032 Uiso 1 1 calc R . .
C15 C -0.20661(7) 0.05390(7) 0.61488(7) 0.0289(2) Uani 1 1 d . . .
H15 H -0.2424 0.0383 0.6531 0.035 Uiso 1 1 calc R . .
C3 C -0.11897(8) 0.33678(7) 0.73238(7) 0.0315(2) Uani 1 1 d . . .
H3A H -0.1443 0.3407 0.6839 0.047 Uiso 1 1 calc R . .
H3B H -0.1039 0.3868 0.7498 0.047 Uiso 1 1 calc R . .
H3C H -0.1584 0.3140 0.7664 0.047 Uiso 1 1 calc R . .
C25 C -0.23138(8) 0.18545(8) 0.65677(7) 0.0330(2) Uani 1 1 d . . .
H25A H -0.2846 0.1653 0.6733 0.049 Uiso 1 1 calc R . .
H25B H -0.2405 0.2327 0.6309 0.049 Uiso 1 1 calc R . .
H25C H -0.1955 0.1942 0.6991 0.049 Uiso 1 1 calc R . .
C14 C -0.17172(7) 0.00004(6) 0.56945(7) 0.0286(2) Uani 1 1 d . . .
C28 C -0.06496(8) 0.49475(7) 0.63964(8) 0.0315(2) Uani 1 1 d . . .
H28A H -0.0680 0.5103 0.6909 0.047 Uiso 1 1 calc R . .
H28B H -0.1091 0.4587 0.6294 0.047 Uiso 1 1 calc R . .
H28C H -0.0716 0.5386 0.6080 0.047 Uiso 1 1 calc R . .
C21 C 0.08914(7) 0.49295(6) 0.65349(6) 0.0257(2) Uani 1 1 d . . .
H21 H 0.0829 0.5341 0.6859 0.031 Uiso 1 1 calc R . .
C23 C -0.05353(8) 0.12175(7) 0.43521(6) 0.0289(2) Uani 1 1 d . . .
H23A H -0.0231 0.0780 0.4174 0.043 Uiso 1 1 calc R . .
H23B H -0.0143 0.1610 0.4491 0.043 Uiso 1 1 calc R . .
H23C H -0.0900 0.1404 0.3965 0.043 Uiso 1 1 calc R . .
C2 C 0.06948(9) 0.32977(7) 0.75718(7) 0.0314(2) Uani 1 1 d . . .
H2A H 0.1063 0.2962 0.7842 0.047 Uiso 1 1 calc R . .
H2B H 0.0526 0.3712 0.7889 0.047 Uiso 1 1 calc R . .
H2C H 0.0986 0.3496 0.7145 0.047 Uiso 1 1 calc R . .
C1 C -0.03642(10) 0.19747(7) 0.79145(7) 0.0348(3) Uani 1 1 d . . .
H1A H -0.0833 0.1665 0.7761 0.052 Uiso 1 1 calc R . .
H1B H -0.0466 0.2169 0.8407 0.052 Uiso 1 1 calc R . .
H1C H 0.0141 0.1672 0.7916 0.052 Uiso 1 1 calc R . .
C27 C 0.24414(9) 0.50368(8) 0.67017(9) 0.0394(3) Uani 1 1 d . . .
H27A H 0.2289 0.5512 0.6933 0.059 Uiso 1 1 calc R . .
H27B H 0.2858 0.5128 0.6324 0.059 Uiso 1 1 calc R . .
H27C H 0.2668 0.4697 0.7071 0.059 Uiso 1 1 calc R . .
C24 C -0.18920(9) -0.08215(7) 0.58148(10) 0.0423(3) Uani 1 1 d . . .
H24A H -0.1844 -0.0938 0.6336 0.063 Uiso 1 1 calc R . .
H24B H -0.1492 -0.1121 0.5539 0.063 Uiso 1 1 calc R . .
H24C H -0.2453 -0.0938 0.5647 0.063 Uiso 1 1 calc R . .
 
loop_
 _atom_site_aniso_label
 _atom_site_aniso_U_11
 _atom_site_aniso_U_22
 _atom_site_aniso_U_33
 _atom_site_aniso_U_23
 _atom_site_aniso_U_13
 _atom_site_aniso_U_12
P 0.02456(13) 0.02170(11) 0.01947(12) -0.00167(9) -0.00100(9) 0.00694(9)
Si 0.02906(15) 0.01896(11) 0.01496(12) -0.00059(9) -0.00080(10) 0.00115(10)
Cl2 0.04516(17) 0.02004(11) 0.03047(14) 0.00224(9) -0.00493(12) 0.00569(10)
Cl1 0.02425(13) 0.03901(15) 0.04546(18) -0.00285(12) -0.00947(12) 0.00912(11)
N 0.0207(4) 0.0171(3) 0.0149(3) -0.0003(3) -0.0018(3) 0.0031(3)
C9 0.0175(4) 0.0179(3) 0.0179(4) 0.0002(3) 0.0008(3) 0.0016(3)
C4 0.0160(4) 0.0181(3) 0.0147(4) 0.0001(3) 0.0002(3) 0.0022(3)
C11 0.0191(4) 0.0212(4) 0.0180(4) 0.0001(3) -0.0022(3) -0.0028(3)
C22 0.0245(5) 0.0173(4) 0.0239(5) 0.0011(3) 0.0004(4) 0.0009(3)
C5 0.0173(4) 0.0206(4) 0.0164(4) -0.0004(3) 0.0005(3) 0.0000(3)
C17 0.0194(4) 0.0166(4) 0.0199(4) 0.0018(3) -0.0004(3) -0.0005(3)
C12 0.0232(5) 0.0221(4) 0.0200(4) -0.0013(3) -0.0036(3) -0.0003(3)
C6 0.0199(4) 0.0266(4) 0.0210(4) 0.0006(3) -0.0042(3) -0.0003(3)
C7 0.0230(5) 0.0279(5) 0.0221(4) 0.0042(4) -0.0043(4) 0.0029(4)
C18 0.0199(4) 0.0211(4) 0.0235(5) 0.0012(3) 0.0016(3) -0.0005(3)
C8 0.0221(5) 0.0220(4) 0.0214(4) 0.0043(3) -0.0017(3) 0.0017(3)
C16 0.0207(5) 0.0292(5) 0.0213(4) 0.0000(4) -0.0008(4) -0.0046(4)
C19 0.0197(5) 0.0266(5) 0.0325(5) 0.0028(4) 0.0001(4) -0.0016(4)
C26 0.0238(5) 0.0308(5) 0.0281(5) -0.0042(4) 0.0062(4) 0.0001(4)
C20 0.0266(5) 0.0222(4) 0.0302(5) 0.0051(4) -0.0056(4) -0.0063(4)
C13 0.0287(5) 0.0216(4) 0.0292(5) -0.0028(4) -0.0071(4) -0.0007(4)
C15 0.0245(5) 0.0325(5) 0.0297(5) 0.0068(4) -0.0021(4) -0.0093(4)
C3 0.0369(6) 0.0313(5) 0.0264(5) -0.0059(4) 0.0036(5) 0.0080(5)
C25 0.0301(6) 0.0424(6) 0.0264(5) -0.0058(5) 0.0078(4) -0.0051(5)
C14 0.0260(5) 0.0240(5) 0.0358(6) 0.0046(4) -0.0098(4) -0.0064(4)
C28 0.0299(6) 0.0242(5) 0.0405(6) -0.0056(4) 0.0023(5) 0.0057(4)
C21 0.0317(5) 0.0174(4) 0.0280(5) -0.0002(3) -0.0036(4) -0.0027(4)
C23 0.0352(6) 0.0305(5) 0.0208(5) -0.0024(4) 0.0029(4) 0.0016(4)
C2 0.0395(6) 0.0306(5) 0.0242(5) -0.0030(4) -0.0080(5) -0.0031(5)
C1 0.0565(8) 0.0267(5) 0.0213(5) 0.0045(4) 0.0047(5) 0.0009(5)
C27 0.0334(6) 0.0345(6) 0.0502(8) -0.0001(5) -0.0125(6) -0.0106(5)
C24 0.0378(7) 0.0266(5) 0.0625(9) 0.0117(6) -0.0130(7) -0.0091(5)

#==============================================================================

# MOLECULAR GEOMETRY
 
_geom_special_details
;
 All s.u.'s (except the s.u. in the dihedral angle between two l.s. planes)
 are estimated using the full covariance matrix.  The cell s.u.'s are taken
 into account individually in the estimation of s.u.'s in distances, angles
 and torsion angles; correlations between s.u.'s in cell parameters are only
 used when they are defined by crystal symmetry.  An approximate (isotropic)
 treatment of cell s.u.'s is used for estimating s.u.'s involving l.s. planes.
;
 
loop_
 _geom_bond_atom_site_label_1
 _geom_bond_atom_site_label_2
 _geom_bond_distance
 _geom_bond_site_symmetry_2
 _geom_bond_publ_flag
P N 1.6760(8) . ?
P Cl2 2.0932(4) . ?
P Cl1 2.1021(4) . ?
Si N 1.8110(8) . ?
Si C2 1.8653(13) . ?
Si C1 1.8655(12) . ?
Si C3 1.8739(13) . ?
N C4 1.4664(12) . ?
C9 C8 1.3994(14) . ?
C9 C4 1.4185(13) . ?
C9 C17 1.4967(14) . ?
C4 C5 1.4109(13) . ?
C11 C16 1.4074(14) . ?
C11 C12 1.4127(14) . ?
C11 C5 1.5047(13) . ?
C22 C21 1.3986(15) . ?
C22 C17 1.4104(14) . ?
C22 C28 1.5157(16) . ?
C5 C6 1.4010(14) . ?
C17 C18 1.4129(14) . ?
C12 C13 1.4008(15) . ?
C12 C23 1.5097(16) . ?
C6 C7 1.3879(15) . ?
C6 H6 0.9500 . ?
C7 C8 1.3892(15) . ?
C7 H7 0.9500 . ?
C18 C19 1.3962(15) . ?
C18 C26 1.5127(15) . ?
C8 H8 0.9500 . ?
C16 C15 1.3977(16) . ?
C16 C25 1.5095(17) . ?
C19 C20 1.3937(17) . ?
C19 H19 0.9500 . ?
C26 H26A 0.9800 . ?
C26 H26B 0.9800 . ?
C26 H26C 0.9800 . ?
C20 C21 1.3894(17) . ?
C20 C27 1.5124(17) . ?
C13 C14 1.3892(18) . ?
C13 H13 0.9500 . ?
C15 C14 1.3925(18) . ?
C15 H15 0.9500 . ?
C3 H3A 0.9800 . ?
C3 H3B 0.9800 . ?
C3 H3C 0.9800 . ?
C25 H25A 0.9800 . ?
C25 H25B 0.9800 . ?
C25 H25C 0.9800 . ?
C14 C24 1.5130(17) . ?
C28 H28A 0.9800 . ?
C28 H28B 0.9800 . ?
C28 H28C 0.9800 . ?
C21 H21 0.9500 . ?
C23 H23A 0.9800 . ?
C23 H23B 0.9800 . ?
C23 H23C 0.9800 . ?
C2 H2A 0.9800 . ?
C2 H2B 0.9800 . ?
C2 H2C 0.9800 . ?
C1 H1A 0.9800 . ?
C1 H1B 0.9800 . ?
C1 H1C 0.9800 . ?
C27 H27A 0.9800 . ?
C27 H27B 0.9800 . ?
C27 H27C 0.9800 . ?
C24 H24A 0.9800 . ?
C24 H24B 0.9800 . ?
C24 H24C 0.9800 . ?
 
loop_
 _geom_angle_atom_site_label_1
 _geom_angle_atom_site_label_2
 _geom_angle_atom_site_label_3
 _geom_angle
 _geom_angle_site_symmetry_1
 _geom_angle_site_symmetry_3
 _geom_angle_publ_flag
N P Cl2 107.48(3) . . ?
N P Cl1 101.79(3) . . ?
Cl2 P Cl1 95.496(17) . . ?
N Si C2 113.17(5) . . ?
N Si C1 110.23(5) . . ?
C2 Si C1 106.42(6) . . ?
N Si C3 107.79(5) . . ?
C2 Si C3 111.09(6) . . ?
C1 Si C3 108.06(6) . . ?
C4 N P 110.95(6) . . ?
C4 N Si 121.87(6) . . ?
P N Si 127.17(5) . . ?
C8 C9 C4 119.14(9) . . ?
C8 C9 C17 117.85(8) . . ?
C4 C9 C17 122.76(8) . . ?
C5 C4 C9 119.71(8) . . ?
C5 C4 N 119.99(8) . . ?
C9 C4 N 120.27(8) . . ?
C16 C11 C12 119.52(9) . . ?
C16 C11 C5 121.21(9) . . ?
C12 C11 C5 119.12(9) . . ?
C21 C22 C17 118.78(10) . . ?
C21 C22 C28 118.45(10) . . ?
C17 C22 C28 122.64(10) . . ?
C6 C5 C4 118.98(9) . . ?
C6 C5 C11 117.41(9) . . ?
C4 C5 C11 123.53(8) . . ?
C22 C17 C18 119.31(9) . . ?
C22 C17 C9 122.59(9) . . ?
C18 C17 C9 117.89(9) . . ?
C13 C12 C11 119.14(10) . . ?
C13 C12 C23 118.64(10) . . ?
C11 C12 C23 122.19(9) . . ?
C7 C6 C5 121.47(9) . . ?
C7 C6 H6 119.3 . . ?
C5 C6 H6 119.3 . . ?
C6 C7 C8 119.38(9) . . ?
C6 C7 H7 120.3 . . ?
C8 C7 H7 120.3 . . ?
C19 C18 C17 119.24(10) . . ?
C19 C18 C26 119.13(10) . . ?
C17 C18 C26 121.45(9) . . ?
C7 C8 C9 121.13(9) . . ?
C7 C8 H8 119.4 . . ?
C9 C8 H8 119.4 . . ?
C15 C16 C11 119.22(10) . . ?
C15 C16 C25 119.11(10) . . ?
C11 C16 C25 121.66(10) . . ?
C20 C19 C18 121.69(10) . . ?
C20 C19 H19 119.2 . . ?
C18 C19 H19 119.2 . . ?
C18 C26 H26A 109.5 . . ?
C18 C26 H26B 109.5 . . ?
H26A C26 H26B 109.5 . . ?
C18 C26 H26C 109.5 . . ?
H26A C26 H26C 109.5 . . ?
H26B C26 H26C 109.5 . . ?
C21 C20 C19 118.04(10) . . ?
C21 C20 C27 121.46(11) . . ?
C19 C20 C27 120.49(11) . . ?
C14 C13 C12 121.91(11) . . ?
C14 C13 H13 119.0 . . ?
C12 C13 H13 119.0 . . ?
C14 C15 C16 122.02(11) . . ?
C14 C15 H15 119.0 . . ?
C16 C15 H15 119.0 . . ?
Si C3 H3A 109.5 . . ?
Si C3 H3B 109.5 . . ?
H3A C3 H3B 109.5 . . ?
Si C3 H3C 109.5 . . ?
H3A C3 H3C 109.5 . . ?
H3B C3 H3C 109.5 . . ?
C16 C25 H25A 109.5 . . ?
C16 C25 H25B 109.5 . . ?
H25A C25 H25B 109.5 . . ?
C16 C25 H25C 109.5 . . ?
H25A C25 H25C 109.5 . . ?
H25B C25 H25C 109.5 . . ?
C13 C14 C15 118.12(10) . . ?
C13 C14 C24 121.25(12) . . ?
C15 C14 C24 120.62(12) . . ?
C22 C28 H28A 109.5 . . ?
C22 C28 H28B 109.5 . . ?
H28A C28 H28B 109.5 . . ?
C22 C28 H28C 109.5 . . ?
H28A C28 H28C 109.5 . . ?
H28B C28 H28C 109.5 . . ?
C20 C21 C22 122.16(10) . . ?
C20 C21 H21 118.9 . . ?
C22 C21 H21 118.9 . . ?
C12 C23 H23A 109.5 . . ?
C12 C23 H23B 109.5 . . ?
H23A C23 H23B 109.5 . . ?
C12 C23 H23C 109.5 . . ?
H23A C23 H23C 109.5 . . ?
H23B C23 H23C 109.5 . . ?
Si C2 H2A 109.5 . . ?
Si C2 H2B 109.5 . . ?
H2A C2 H2B 109.5 . . ?
Si C2 H2C 109.5 . . ?
H2A C2 H2C 109.5 . . ?
H2B C2 H2C 109.5 . . ?
Si C1 H1A 109.5 . . ?
Si C1 H1B 109.5 . . ?
H1A C1 H1B 109.5 . . ?
Si C1 H1C 109.5 . . ?
H1A C1 H1C 109.5 . . ?
H1B C1 H1C 109.5 . . ?
C20 C27 H27A 109.5 . . ?
C20 C27 H27B 109.5 . . ?
H27A C27 H27B 109.5 . . ?
C20 C27 H27C 109.5 . . ?
H27A C27 H27C 109.5 . . ?
H27B C27 H27C 109.5 . . ?
C14 C24 H24A 109.5 . . ?
C14 C24 H24B 109.5 . . ?
H24A C24 H24B 109.5 . . ?
C14 C24 H24C 109.5 . . ?
H24A C24 H24C 109.5 . . ?
H24B C24 H24C 109.5 . . ?
 
loop_
 _geom_torsion_atom_site_label_1
 _geom_torsion_atom_site_label_2
 _geom_torsion_atom_site_label_3
 _geom_torsion_atom_site_label_4
 _geom_torsion
 _geom_torsion_site_symmetry_1
 _geom_torsion_site_symmetry_2
 _geom_torsion_site_symmetry_3
 _geom_torsion_site_symmetry_4
 _geom_torsion_publ_flag
Cl2 P N C4 -124.96(6) . . . . ?
Cl1 P N C4 135.35(6) . . . . ?
Cl2 P N Si 56.29(7) . . . . ?
Cl1 P N Si -43.40(7) . . . . ?
C2 Si N C4 -106.21(8) . . . . ?
C1 Si N C4 134.75(8) . . . . ?
C3 Si N C4 17.03(9) . . . . ?
C2 Si N P 72.41(8) . . . . ?
C1 Si N P -46.63(9) . . . . ?
C3 Si N P -164.34(7) . . . . ?
C8 C9 C4 C5 5.13(14) . . . . ?
C17 C9 C4 C5 -168.99(9) . . . . ?
C8 C9 C4 N -176.70(9) . . . . ?
C17 C9 C4 N 9.17(14) . . . . ?
P N C4 C5 64.44(10) . . . . ?
Si N C4 C5 -116.74(9) . . . . ?
P N C4 C9 -113.72(8) . . . . ?
Si N C4 C9 65.10(11) . . . . ?
C9 C4 C5 C6 -3.16(14) . . . . ?
N C4 C5 C6 178.67(9) . . . . ?
C9 C4 C5 C11 173.51(9) . . . . ?
N C4 C5 C11 -4.66(14) . . . . ?
C16 C11 C5 C6 -99.72(12) . . . . ?
C12 C11 C5 C6 75.64(12) . . . . ?
C16 C11 C5 C4 83.56(13) . . . . ?
C12 C11 C5 C4 -101.08(12) . . . . ?
C21 C22 C17 C18 -9.57(15) . . . . ?
C28 C22 C17 C18 166.31(10) . . . . ?
C21 C22 C17 C9 175.87(9) . . . . ?
C28 C22 C17 C9 -8.25(15) . . . . ?
C8 C9 C17 C22 71.97(13) . . . . ?
C4 C9 C17 C22 -113.83(11) . . . . ?
C8 C9 C17 C18 -102.66(11) . . . . ?
C4 C9 C17 C18 71.54(13) . . . . ?
C16 C11 C12 C13 -2.97(15) . . . . ?
C5 C11 C12 C13 -178.41(9) . . . . ?
C16 C11 C12 C23 175.08(10) . . . . ?
C5 C11 C12 C23 -0.37(15) . . . . ?
C4 C5 C6 C7 -0.85(15) . . . . ?
C11 C5 C6 C7 -177.72(10) . . . . ?
C5 C6 C7 C8 2.85(17) . . . . ?
C22 C17 C18 C19 8.09(15) . . . . ?
C9 C17 C18 C19 -177.09(9) . . . . ?
C22 C17 C18 C26 -167.05(10) . . . . ?
C9 C17 C18 C26 7.77(14) . . . . ?
C6 C7 C8 C9 -0.79(16) . . . . ?
C4 C9 C8 C7 -3.18(15) . . . . ?
C17 C9 C8 C7 171.24(10) . . . . ?
C12 C11 C16 C15 2.01(15) . . . . ?
C5 C11 C16 C15 177.36(10) . . . . ?
C12 C11 C16 C25 -176.80(10) . . . . ?
C5 C11 C16 C25 -1.46(16) . . . . ?
C17 C18 C19 C20 -0.60(16) . . . . ?
C26 C18 C19 C20 174.65(10) . . . . ?
C18 C19 C20 C21 -5.26(17) . . . . ?
C18 C19 C20 C27 175.04(11) . . . . ?
C11 C12 C13 C14 1.52(16) . . . . ?
C23 C12 C13 C14 -176.60(11) . . . . ?
C11 C16 C15 C14 0.46(17) . . . . ?
C25 C16 C15 C14 179.30(11) . . . . ?
C12 C13 C14 C15 0.90(17) . . . . ?
C12 C13 C14 C24 -179.92(11) . . . . ?
C16 C15 C14 C13 -1.91(17) . . . . ?
C16 C15 C14 C24 178.90(11) . . . . ?
C19 C20 C21 C22 3.69(17) . . . . ?
C27 C20 C21 C22 -176.62(11) . . . . ?
C17 C22 C21 C20 3.70(16) . . . . ?
C28 C22 C21 C20 -172.36(11) . . . . ?
 
_diffrn_measured_fraction_theta_max    0.998
_diffrn_reflns_theta_full              35.34
_diffrn_measured_fraction_theta_full   0.997
_refine_diff_density_max    0.491
_refine_diff_density_min   -0.362
_refine_diff_density_rms    0.059

#=============================================================================
 
data_av_aw100_MesNtmsPCl2

_audit_author_name                'Villinger, A.' 
_audit_creation_method            SHELXL-97 

#==============================================================================

# CHEMICAL DATA

_chemical_name_systematic
;
N-(2,4,6-tri-tert.butylphenyl)-N-(trimethylsilyl)amino-dichlorophosphane
;
_chemical_name_common             ?
_chemical_melting_point           ?
_chemical_formula_moiety          'C21 H38 Cl2 N P Si'
_chemical_formula_sum
 'C21 H38 Cl2 N P Si'
_chemical_formula_weight          434.48
 
loop_
 _atom_type_symbol
 _atom_type_description
 _atom_type_scat_dispersion_real
 _atom_type_scat_dispersion_imag
 _atom_type_scat_source
 'C'  'C'   0.0033   0.0016
 'International Tables Vol C Tables 4.2.6.8 and 6.1.1.4'
 'H'  'H'   0.0000   0.0000
 'International Tables Vol C Tables 4.2.6.8 and 6.1.1.4'
 'N'  'N'   0.0061   0.0033
 'International Tables Vol C Tables 4.2.6.8 and 6.1.1.4'
 'P'  'P'   0.1023   0.0942
 'International Tables Vol C Tables 4.2.6.8 and 6.1.1.4'
 'Cl'  'Cl'   0.1484   0.1585
 'International Tables Vol C Tables 4.2.6.8 and 6.1.1.4'
 'Si'  'Si'   0.0817   0.0704
 'International Tables Vol C Tables 4.2.6.8 and 6.1.1.4'
 
#==============================================================================

# CRYSTAL DATA
 
_symmetry_cell_setting            monoclinic
_symmetry_space_group_name_H-M    'P 21/n'
_symmetry_space_group_name_Hall   '-P 2yn'
_symmetry_Int_Tables_number       14
 
loop_
 _symmetry_equiv_pos_as_xyz
 'x, y, z'
 '-x+1/2, y+1/2, -z+1/2'
 '-x, -y, -z'
 'x-1/2, -y-1/2, z-1/2'
 
_cell_length_a                    10.2067(8)
_cell_length_b                    12.3966(10)
_cell_length_c                    19.7569(15)
_cell_angle_alpha                 90.00
_cell_angle_beta                  101.559(4)
_cell_angle_gamma                 90.00
_cell_volume                      2449.1(3)
_cell_formula_units_Z             4
_cell_measurement_temperature     173(2)
_cell_measurement_reflns_used     3988
_cell_measurement_theta_min       5.328 
_cell_measurement_theta_max       50.024
 
_exptl_crystal_description        needle
_exptl_crystal_colour             colourless
_exptl_crystal_size_max           0.57
_exptl_crystal_size_mid           0.12
_exptl_crystal_size_min           0.07
_exptl_crystal_density_meas       ?
_exptl_crystal_density_diffrn     1.178
_exptl_crystal_density_method     'not measured'
_exptl_crystal_F_000              936
_exptl_absorpt_coefficient_mu     0.386
_exptl_absorpt_correction_type    'multi-scan'
_exptl_absorpt_correction_T_min   0.8102
_exptl_absorpt_correction_T_max   0.9735
_exptl_absorpt_process_details    '(SADABS; Sheldrick, 2004)'

#==============================================================================

# EXPERIMENTAL DATA
 
_exptl_special_details
;
 ?
;
 
_diffrn_ambient_temperature       173(2)
_diffrn_radiation_wavelength      0.71073
_diffrn_radiation_type            MoK\a
_diffrn_radiation_source          'sealed tube'
_diffrn_radiation_monochromator   graphite
_diffrn_measurement_device_type   'Bruker Apex Kappa II-CCD-diffractometer'
_diffrn_measurement_method        'phi and omega scans'
_diffrn_detector_area_resol_mean  ?
_diffrn_standards_number          ?
_diffrn_standards_interval_count  ?
_diffrn_standards_interval_time   ?
_diffrn_standards_decay_%         ?
_diffrn_reflns_number             24935
_diffrn_reflns_av_R_equivalents   0.0615
_diffrn_reflns_av_sigmaI/netI     0.0599
_diffrn_reflns_limit_h_min        -12
_diffrn_reflns_limit_h_max        13
_diffrn_reflns_limit_k_min        -15
_diffrn_reflns_limit_k_max        11
_diffrn_reflns_limit_l_min        -25
_diffrn_reflns_limit_l_max        25
_diffrn_reflns_theta_min          2.47
_diffrn_reflns_theta_max          27.00
_reflns_number_total              5346
_reflns_number_gt                 3725
_reflns_threshold_expression      >2\s(I)
 
_computing_data_collection        'Bruker Apex V7.51A'
_computing_cell_refinement        'Bruker Apex V7.51A'
_computing_data_reduction         'Bruker SAINT'
_computing_structure_solution     'SHELXS-97 (Sheldrick, 1997)'
_computing_structure_refinement   'SHELXL-97 (Sheldrick, 1997)'
_computing_molecular_graphics     'ORTEP-3v2.01 (Farrugia, 1997)' 
_computing_publication_material   'SHELXL-97'

#==============================================================================

# REFINEMENT DATA 

_refine_special_details
;
 All H atoms were positioned geometrically and refined using a riding model, 
 with C---H = 0.98 (methyl groups), 0.99\%A (methylene groups), 
 1.00\%A (methine groups) or 0.95 \%A (aryl CH) and with <i>U</i>~iso~(H) = 
 1.5 times <i>U</i>~eq~(C) (methyl groups) or with <i>U</i>~iso~(H) = 1.2 times 
 <i>U</i>~eq~(C) (methylene  groups, aryl CH, methine groups). Torsion angles 
 of all methyl groups were allowed to refine.
 
 Refinement of F^2^ against ALL reflections.  The weighted R-factor wR and
 goodness of fit S are based on F^2^, conventional R-factors R are based
 on F, with F set to zero for negative F^2^. The threshold expression of
 F^2^ > 2\s(F^2^) is used only for calculating R-factors(gt) etc. and is
 not relevant to the choice of reflections for refinement.  R-factors based
 on F^2^ are statistically about twice as large as those based on F, and R-
 factors based on ALL data will be even larger.
;
 
_refine_ls_structure_factor_coef  Fsqd
_refine_ls_matrix_type            full
_refine_ls_weighting_scheme       calc
_refine_ls_weighting_details
 'calc w=1/[\s^2^(Fo^2^)+(0.0440P)^2^+0.0000P] where P=(Fo^2^+2Fc^2^)/3'
_atom_sites_solution_primary      direct
_atom_sites_solution_secondary    difmap
_atom_sites_solution_hydrogens    geom
_refine_ls_hydrogen_treatment     constr
_refine_ls_extinction_method      none
_refine_ls_extinction_coef        ?
_refine_ls_number_reflns          5346
_refine_ls_number_parameters      257
_refine_ls_number_restraints      3
_refine_ls_R_factor_all           0.0737
_refine_ls_R_factor_gt            0.0407
_refine_ls_wR_factor_ref          0.0978
_refine_ls_wR_factor_gt           0.0894
_refine_ls_goodness_of_fit_ref    1.028
_refine_ls_restrained_S_all       1.028
_refine_ls_shift/su_max           0.000
_refine_ls_shift/su_mean          0.000

#==============================================================================

# ATOMIC COORDINATES AND DISPLACEMENT PARAMETERS
 
loop_
 _atom_site_label
 _atom_site_type_symbol
 _atom_site_fract_x
 _atom_site_fract_y
 _atom_site_fract_z
 _atom_site_U_iso_or_equiv
 _atom_site_adp_type
 _atom_site_occupancy
 _atom_site_symmetry_multiplicity
 _atom_site_calc_flag
 _atom_site_refinement_flags
 _atom_site_disorder_assembly
 _atom_site_disorder_group
N1 N -0.04741(15) 0.11203(12) 0.17524(7) 0.0184(4) Uani 1 1 d . . .
P1 P -0.06959(6) -0.01999(4) 0.18019(3) 0.02465(14) Uani 1 1 d . . .
Cl1 Cl -0.27799(6) -0.04963(5) 0.15313(3) 0.03653(16) Uani 1 1 d . . .
Cl2 Cl -0.06580(6) -0.04318(4) 0.28557(3) 0.03465(15) Uani 1 1 d . . .
Si1 Si -0.10116(6) 0.21682(5) 0.22754(3) 0.02252(15) Uani 1 1 d . . .
C1 C 0.03215(19) 0.15115(15) 0.12489(9) 0.0188(4) Uani 1 1 d . . .
C2 C -0.0354(2) 0.18401(15) 0.05772(9) 0.0209(4) Uani 1 1 d . . .
C3 C 0.0342(2) 0.24908(16) 0.02029(10) 0.0250(5) Uani 1 1 d . . .
H3 H -0.0109 0.2730 -0.0239 0.030 Uiso 1 1 calc R . .
C4 C 0.1656(2) 0.28162(16) 0.04302(10) 0.0253(5) Uani 1 1 d . A .
C5 C 0.2310(2) 0.23791(16) 0.10450(10) 0.0241(5) Uani 1 1 d . . .
H5 H 0.3231 0.2544 0.1197 0.029 Uiso 1 1 calc R . .
C6 C 0.17044(19) 0.17064(15) 0.14614(9) 0.0195(4) Uani 1 1 d . . .
C7 C -0.1767(2) 0.14696(17) 0.02065(10) 0.0257(5) Uani 1 1 d . . .
C8 C -0.2888(2) 0.17920(18) 0.05810(11) 0.0312(5) Uani 1 1 d . . .
H8A H -0.2958 0.2580 0.0591 0.047 Uiso 1 1 calc R . .
H8B H -0.2685 0.1514 0.1055 0.047 Uiso 1 1 calc R . .
H8C H -0.3738 0.1487 0.0336 0.047 Uiso 1 1 calc R . .
C9 C -0.1740(2) 0.02409(17) 0.00877(10) 0.0301(5) Uani 1 1 d . . .
H9A H -0.2657 -0.0027 -0.0054 0.045 Uiso 1 1 calc R . .
H9B H -0.1308 -0.0116 0.0517 0.045 Uiso 1 1 calc R . .
H9C H -0.1238 0.0086 -0.0275 0.045 Uiso 1 1 calc R . .
C10 C -0.2186(2) 0.1955(2) -0.05216(11) 0.0425(6) Uani 1 1 d . . .
H10A H -0.2215 0.2743 -0.0488 0.064 Uiso 1 1 calc R . .
H10B H -0.3073 0.1684 -0.0738 0.064 Uiso 1 1 calc R . .
H10C H -0.1537 0.1747 -0.0802 0.064 Uiso 1 1 calc R . .
C11 C 0.2358(2) 0.36001(19) 0.00220(11) 0.0330(5) Uani 1 1 d . . .
C12A C 0.1557(4) 0.3799(4) -0.07074(16) 0.0652(11) Uani 0.846(4) 1 d PD A 1
H12A H 0.1384 0.3110 -0.0952 0.098 Uiso 0.846(4) 1 calc PR A 1
H12B H 0.2069 0.4270 -0.0957 0.098 Uiso 0.846(4) 1 calc PR A 1
H12C H 0.0706 0.4145 -0.0681 0.098 Uiso 0.846(4) 1 calc PR A 1
C13A C 0.3702(3) 0.3120(3) -0.0061(2) 0.0677(12) Uani 0.846(4) 1 d PD A 1
H13A H 0.4266 0.3000 0.0396 0.101 Uiso 0.846(4) 1 calc PR A 1
H13B H 0.4151 0.3620 -0.0323 0.101 Uiso 0.846(4) 1 calc PR A 1
H13C H 0.3548 0.2431 -0.0308 0.101 Uiso 0.846(4) 1 calc PR A 1
C14A C 0.2586(4) 0.4651(3) 0.04065(18) 0.0621(11) Uani 0.846(4) 1 d PD A 1
H14A H 0.1723 0.4958 0.0452 0.093 Uiso 0.846(4) 1 calc PR A 1
H14B H 0.3047 0.5154 0.0151 0.093 Uiso 0.846(4) 1 calc PR A 1
H14C H 0.3135 0.4525 0.0867 0.093 Uiso 0.846(4) 1 calc PR A 1
C12B C 0.3849(18) 0.3817(19) 0.0361(9) 0.0652(11) Uani 0.154(4) 1 d PD A 2
H12D H 0.4343 0.3134 0.0411 0.098 Uiso 0.154(4) 1 calc PR A 2
H12E H 0.3899 0.4144 0.0817 0.098 Uiso 0.154(4) 1 calc PR A 2
H12F H 0.4242 0.4309 0.0068 0.098 Uiso 0.154(4) 1 calc PR A 2
C13B C 0.164(2) 0.4747(16) 0.0038(12) 0.0677(12) Uani 0.154(4) 1 d PD A 2
H13D H 0.2052 0.5272 -0.0227 0.101 Uiso 0.154(4) 1 calc PR A 2
H13E H 0.1749 0.4994 0.0517 0.101 Uiso 0.154(4) 1 calc PR A 2
H13F H 0.0689 0.4677 -0.0166 0.101 Uiso 0.154(4) 1 calc PR A 2
C14B C 0.222(2) 0.3290(16) -0.0701(10) 0.0621(11) Uani 0.154(4) 1 d PD A 2
H14D H 0.2708 0.3805 -0.0936 0.093 Uiso 0.154(4) 1 calc PR A 2
H14E H 0.1273 0.3292 -0.0925 0.093 Uiso 0.154(4) 1 calc PR A 2
H14F H 0.2591 0.2565 -0.0729 0.093 Uiso 0.154(4) 1 calc PR A 2
C15 C 0.27415(19) 0.12252(16) 0.20765(9) 0.0228(5) Uani 1 1 d . . .
C16 C 0.3798(2) 0.06155(19) 0.17649(11) 0.0333(5) Uani 1 1 d . . .
H16A H 0.4491 0.0331 0.2138 0.050 Uiso 1 1 calc R . .
H16B H 0.4205 0.1111 0.1480 0.050 Uiso 1 1 calc R . .
H16C H 0.3369 0.0018 0.1479 0.050 Uiso 1 1 calc R . .
C17 C 0.3452(2) 0.21431(18) 0.25352(10) 0.0334(5) Uani 1 1 d . . .
H17A H 0.2794 0.2548 0.2733 0.050 Uiso 1 1 calc R . .
H17B H 0.3886 0.2628 0.2256 0.050 Uiso 1 1 calc R . .
H17C H 0.4127 0.1837 0.2909 0.050 Uiso 1 1 calc R . .
C18 C 0.2246(2) 0.04156(17) 0.25422(10) 0.0302(5) Uani 1 1 d . . .
H18A H 0.3002 0.0151 0.2889 0.045 Uiso 1 1 calc R . .
H18B H 0.1820 -0.0191 0.2265 0.045 Uiso 1 1 calc R . .
H18C H 0.1594 0.0763 0.2774 0.045 Uiso 1 1 calc R . .
C19 C -0.0922(2) 0.34694(16) 0.18264(11) 0.0317(5) Uani 1 1 d . . .
H19A H -0.0004 0.3592 0.1766 0.048 Uiso 1 1 calc R . .
H19B H -0.1191 0.4056 0.2102 0.048 Uiso 1 1 calc R . .
H19C H -0.1525 0.3449 0.1373 0.048 Uiso 1 1 calc R . .
C20 C 0.0097(2) 0.22967(19) 0.31403(10) 0.0347(5) Uani 1 1 d . . .
H20A H 0.0095 0.1617 0.3394 0.052 Uiso 1 1 calc R . .
H20B H -0.0229 0.2880 0.3398 0.052 Uiso 1 1 calc R . .
H20C H 0.1009 0.2460 0.3086 0.052 Uiso 1 1 calc R . .
C21 C -0.2715(2) 0.18855(18) 0.24238(11) 0.0307(5) Uani 1 1 d . . .
H21A H -0.3363 0.1953 0.1987 0.046 Uiso 1 1 calc R . .
H21B H -0.2936 0.2403 0.2759 0.046 Uiso 1 1 calc R . .
H21C H -0.2747 0.1151 0.2604 0.046 Uiso 1 1 calc R . .
 
loop_
 _atom_site_aniso_label
 _atom_site_aniso_U_11
 _atom_site_aniso_U_22
 _atom_site_aniso_U_33
 _atom_site_aniso_U_23
 _atom_site_aniso_U_13
 _atom_site_aniso_U_12
N1 0.0171(9) 0.0187(9) 0.0190(8) -0.0005(6) 0.0027(7) 0.0003(7)
P1 0.0253(3) 0.0189(3) 0.0292(3) 0.0007(2) 0.0042(2) -0.0013(2)
Cl1 0.0294(3) 0.0354(3) 0.0432(3) 0.0020(2) 0.0031(3) -0.0125(2)
Cl2 0.0367(3) 0.0336(3) 0.0334(3) 0.0100(2) 0.0065(2) -0.0038(2)
Si1 0.0207(3) 0.0226(3) 0.0243(3) -0.0049(2) 0.0043(2) -0.0007(2)
C1 0.0192(11) 0.0161(10) 0.0213(10) -0.0022(8) 0.0047(8) 0.0015(8)
C2 0.0204(11) 0.0208(10) 0.0204(10) -0.0021(8) 0.0016(8) 0.0036(8)
C3 0.0289(13) 0.0260(11) 0.0195(10) 0.0036(8) 0.0031(9) 0.0055(9)
C4 0.0295(13) 0.0215(11) 0.0268(11) -0.0002(8) 0.0103(9) 0.0009(9)
C5 0.0175(11) 0.0265(12) 0.0278(11) -0.0010(9) 0.0031(9) 0.0002(9)
C6 0.0211(11) 0.0171(10) 0.0202(10) -0.0017(8) 0.0038(8) 0.0008(8)
C7 0.0222(12) 0.0286(12) 0.0233(10) -0.0005(9) -0.0027(9) 0.0019(9)
C8 0.0192(12) 0.0317(12) 0.0388(12) -0.0055(10) -0.0033(10) 0.0022(9)
C9 0.0274(13) 0.0334(13) 0.0273(11) -0.0068(9) 0.0002(9) -0.0023(10)
C10 0.0414(15) 0.0471(15) 0.0306(12) 0.0056(11) -0.0126(11) -0.0040(12)
C11 0.0339(14) 0.0343(13) 0.0332(12) 0.0087(10) 0.0125(10) -0.0004(10)
C12A 0.069(3) 0.083(3) 0.0446(18) 0.0312(19) 0.0136(18) -0.017(2)
C13A 0.058(2) 0.071(3) 0.089(3) 0.031(2) 0.054(2) 0.0108(19)
C14A 0.089(3) 0.039(2) 0.067(2) 0.0029(16) 0.037(2) -0.0186(19)
C12B 0.069(3) 0.083(3) 0.0446(18) 0.0312(19) 0.0136(18) -0.017(2)
C13B 0.058(2) 0.071(3) 0.089(3) 0.031(2) 0.054(2) 0.0108(19)
C14B 0.089(3) 0.039(2) 0.067(2) 0.0029(16) 0.037(2) -0.0186(19)
C15 0.0173(11) 0.0242(11) 0.0241(10) 0.0007(8) -0.0022(8) -0.0008(9)
C16 0.0241(13) 0.0380(14) 0.0356(12) 0.0007(10) 0.0005(10) 0.0069(10)
C17 0.0325(13) 0.0350(13) 0.0294(11) -0.0023(10) -0.0020(10) -0.0056(10)
C18 0.0240(12) 0.0314(13) 0.0319(11) 0.0081(9) -0.0019(9) 0.0048(10)
C19 0.0354(14) 0.0231(12) 0.0380(12) -0.0071(9) 0.0108(10) -0.0012(10)
C20 0.0316(13) 0.0416(14) 0.0302(11) -0.0129(10) 0.0042(10) 0.0025(11)
C21 0.0270(13) 0.0318(13) 0.0353(12) -0.0059(10) 0.0111(10) 0.0005(10)

#==============================================================================

# MOLECULAR GEOMETRY
 
_geom_special_details
;
 All s.u.'s (except the s.u. in the dihedral angle between two l.s. planes)
 are estimated using the full covariance matrix.  The cell s.u.'s are taken
 into account individually in the estimation of s.u.'s in distances, angles
 and torsion angles; correlations between s.u.'s in cell parameters are only
 used when they are defined by crystal symmetry.  An approximate (isotropic)
 treatment of cell s.u.'s is used for estimating s.u.'s involving l.s. planes.
;
 
loop_
 _geom_bond_atom_site_label_1
 _geom_bond_atom_site_label_2
 _geom_bond_distance
 _geom_bond_site_symmetry_2
 _geom_bond_publ_flag
N1 C1 1.486(2) . ?
N1 P1 1.6577(16) . ?
N1 Si1 1.8121(16) . ?
P1 Cl2 2.0944(8) . ?
P1 Cl1 2.1189(8) . ?
Si1 C19 1.852(2) . ?
Si1 C21 1.854(2) . ?
Si1 C20 1.857(2) . ?
C1 C6 1.410(3) . ?
C1 C2 1.427(2) . ?
C2 C3 1.384(3) . ?
C2 C7 1.551(3) . ?
C3 C4 1.385(3) . ?
C3 H3 0.9500 . ?
C4 C5 1.375(3) . ?
C4 C11 1.530(3) . ?
C5 C6 1.399(3) . ?
C5 H5 0.9500 . ?
C6 C15 1.561(3) . ?
C7 C8 1.535(3) . ?
C7 C10 1.539(3) . ?
C7 C9 1.542(3) . ?
C8 H8A 0.9800 . ?
C8 H8B 0.9800 . ?
C8 H8C 0.9800 . ?
C9 H9A 0.9800 . ?
C9 H9B 0.9800 . ?
C9 H9C 0.9800 . ?
C10 H10A 0.9800 . ?
C10 H10B 0.9800 . ?
C10 H10C 0.9800 . ?
C11 C14B 1.459(18) . ?
C11 C14A 1.502(4) . ?
C11 C12A 1.528(4) . ?
C11 C13A 1.534(4) . ?
C11 C12B 1.558(18) . ?
C11 C13B 1.602(18) . ?
C12A H12A 0.9800 . ?
C12A H12B 0.9800 . ?
C12A H12C 0.9800 . ?
C13A H13A 0.9800 . ?
C13A H13B 0.9800 . ?
C13A H13C 0.9800 . ?
C14A H14A 0.9800 . ?
C14A H14B 0.9800 . ?
C14A H14C 0.9800 . ?
C12B H12D 0.9800 . ?
C12B H12E 0.9800 . ?
C12B H12F 0.9800 . ?
C13B H13D 0.9800 . ?
C13B H13E 0.9800 . ?
C13B H13F 0.9800 . ?
C14B H14D 0.9800 . ?
C14B H14E 0.9800 . ?
C14B H14F 0.9800 . ?
C15 C18 1.516(3) . ?
C15 C17 1.542(3) . ?
C15 C16 1.543(3) . ?
C16 H16A 0.9800 . ?
C16 H16B 0.9800 . ?
C16 H16C 0.9800 . ?
C17 H17A 0.9800 . ?
C17 H17B 0.9800 . ?
C17 H17C 0.9800 . ?
C18 H18A 0.9800 . ?
C18 H18B 0.9800 . ?
C18 H18C 0.9800 . ?
C19 H19A 0.9800 . ?
C19 H19B 0.9800 . ?
C19 H19C 0.9800 . ?
C20 H20A 0.9800 . ?
C20 H20B 0.9800 . ?
C20 H20C 0.9800 . ?
C21 H21A 0.9800 . ?
C21 H21B 0.9800 . ?
C21 H21C 0.9800 . ?
 
loop_
 _geom_angle_atom_site_label_1
 _geom_angle_atom_site_label_2
 _geom_angle_atom_site_label_3
 _geom_angle
 _geom_angle_site_symmetry_1
 _geom_angle_site_symmetry_3
 _geom_angle_publ_flag
C1 N1 P1 117.46(12) . . ?
C1 N1 Si1 114.60(11) . . ?
P1 N1 Si1 127.85(9) . . ?
N1 P1 Cl2 102.63(6) . . ?
N1 P1 Cl1 107.36(6) . . ?
Cl2 P1 Cl1 92.56(3) . . ?
N1 Si1 C19 107.56(8) . . ?
N1 Si1 C21 110.82(8) . . ?
C19 Si1 C21 112.22(10) . . ?
N1 Si1 C20 112.82(9) . . ?
C19 Si1 C20 106.66(10) . . ?
C21 Si1 C20 106.76(10) . . ?
C6 C1 C2 119.77(17) . . ?
C6 C1 N1 120.33(15) . . ?
C2 C1 N1 119.25(16) . . ?
C3 C2 C1 117.33(17) . . ?
C3 C2 C7 116.70(16) . . ?
C1 C2 C7 125.82(17) . . ?
C2 C3 C4 124.33(18) . . ?
C2 C3 H3 117.8 . . ?
C4 C3 H3 117.8 . . ?
C5 C4 C3 116.03(18) . . ?
C5 C4 C11 121.33(19) . . ?
C3 C4 C11 122.63(18) . . ?
C4 C5 C6 124.11(19) . . ?
C4 C5 H5 117.9 . . ?
C6 C5 H5 117.9 . . ?
C5 C6 C1 117.42(17) . . ?
C5 C6 C15 112.02(16) . . ?
C1 C6 C15 130.41(17) . . ?
C8 C7 C10 104.75(17) . . ?
C8 C7 C9 111.62(17) . . ?
C10 C7 C9 104.72(17) . . ?
C8 C7 C2 114.07(16) . . ?
C10 C7 C2 112.55(18) . . ?
C9 C7 C2 108.72(16) . . ?
C7 C8 H8A 109.5 . . ?
C7 C8 H8B 109.5 . . ?
H8A C8 H8B 109.5 . . ?
C7 C8 H8C 109.5 . . ?
H8A C8 H8C 109.5 . . ?
H8B C8 H8C 109.5 . . ?
C7 C9 H9A 109.5 . . ?
C7 C9 H9B 109.5 . . ?
H9A C9 H9B 109.5 . . ?
C7 C9 H9C 109.5 . . ?
H9A C9 H9C 109.5 . . ?
H9B C9 H9C 109.5 . . ?
C7 C10 H10A 109.5 . . ?
C7 C10 H10B 109.5 . . ?
H10A C10 H10B 109.5 . . ?
C7 C10 H10C 109.5 . . ?
H10A C10 H10C 109.5 . . ?
H10B C10 H10C 109.5 . . ?
C14B C11 C14A 134.3(8) . . ?
C14B C11 C12A 36.0(9) . . ?
C14A C11 C12A 109.6(2) . . ?
C14B C11 C4 112.7(8) . . ?
C14A C11 C4 108.99(19) . . ?
C12A C11 C4 112.4(2) . . ?
C14B C11 C13A 72.9(10) . . ?
C14A C11 C13A 109.9(3) . . ?
C12A C11 C13A 106.4(2) . . ?
C4 C11 C13A 109.5(2) . . ?
C14B C11 C12B 111.1(11) . . ?
C14A C11 C12B 66.1(9) . . ?
C12A C11 C12B 132.0(6) . . ?
C4 C11 C12B 113.8(6) . . ?
C13A C11 C12B 45.2(9) . . ?
C14B C11 C13B 107.4(11) . . ?
C14A C11 C13B 41.0(8) . . ?
C12A C11 C13B 73.5(8) . . ?
C4 C11 C13B 106.8(6) . . ?
C13A C11 C13B 140.2(7) . . ?
C12B C11 C13B 104.4(11) . . ?
C11 C12A H12A 109.5 . . ?
C11 C12A H12B 109.5 . . ?
C11 C12A H12C 109.5 . . ?
C11 C13A H13A 109.5 . . ?
C11 C13A H13B 109.5 . . ?
C11 C13A H13C 109.5 . . ?
C11 C14A H14A 109.5 . . ?
C11 C14A H14B 109.5 . . ?
C11 C14A H14C 109.5 . . ?
C11 C12B H12D 109.5 . . ?
C11 C12B H12E 109.5 . . ?
H12D C12B H12E 109.5 . . ?
C11 C12B H12F 109.5 . . ?
H12D C12B H12F 109.5 . . ?
H12E C12B H12F 109.5 . . ?
C11 C13B H13D 109.5 . . ?
C11 C13B H13E 109.5 . . ?
H13D C13B H13E 109.5 . . ?
C11 C13B H13F 109.5 . . ?
H13D C13B H13F 109.5 . . ?
H13E C13B H13F 109.5 . . ?
C11 C14B H14D 109.5 . . ?
C11 C14B H14E 109.5 . . ?
H14D C14B H14E 109.5 . . ?
C11 C14B H14F 109.5 . . ?
H14D C14B H14F 109.5 . . ?
H14E C14B H14F 109.5 . . ?
C18 C15 C17 107.86(16) . . ?
C18 C15 C16 105.25(17) . . ?
C17 C15 C16 108.19(17) . . ?
C18 C15 C6 117.96(16) . . ?
C17 C15 C6 109.94(16) . . ?
C16 C15 C6 107.21(15) . . ?
C15 C16 H16A 109.5 . . ?
C15 C16 H16B 109.5 . . ?
H16A C16 H16B 109.5 . . ?
C15 C16 H16C 109.5 . . ?
H16A C16 H16C 109.5 . . ?
H16B C16 H16C 109.5 . . ?
C15 C17 H17A 109.5 . . ?
C15 C17 H17B 109.5 . . ?
H17A C17 H17B 109.5 . . ?
C15 C17 H17C 109.5 . . ?
H17A C17 H17C 109.5 . . ?
H17B C17 H17C 109.5 . . ?
C15 C18 H18A 109.5 . . ?
C15 C18 H18B 109.5 . . ?
H18A C18 H18B 109.5 . . ?
C15 C18 H18C 109.5 . . ?
H18A C18 H18C 109.5 . . ?
H18B C18 H18C 109.5 . . ?
Si1 C19 H19A 109.5 . . ?
Si1 C19 H19B 109.5 . . ?
H19A C19 H19B 109.5 . . ?
Si1 C19 H19C 109.5 . . ?
H19A C19 H19C 109.5 . . ?
H19B C19 H19C 109.5 . . ?
Si1 C20 H20A 109.5 . . ?
Si1 C20 H20B 109.5 . . ?
H20A C20 H20B 109.5 . . ?
Si1 C20 H20C 109.5 . . ?
H20A C20 H20C 109.5 . . ?
H20B C20 H20C 109.5 . . ?
Si1 C21 H21A 109.5 . . ?
Si1 C21 H21B 109.5 . . ?
H21A C21 H21B 109.5 . . ?
Si1 C21 H21C 109.5 . . ?
H21A C21 H21C 109.5 . . ?
H21B C21 H21C 109.5 . . ?
 
loop_
 _geom_torsion_atom_site_label_1
 _geom_torsion_atom_site_label_2
 _geom_torsion_atom_site_label_3
 _geom_torsion_atom_site_label_4
 _geom_torsion
 _geom_torsion_site_symmetry_1
 _geom_torsion_site_symmetry_2
 _geom_torsion_site_symmetry_3
 _geom_torsion_site_symmetry_4
 _geom_torsion_publ_flag
C1 N1 P1 Cl2 144.60(11) . . . . ?
Si1 N1 P1 Cl2 -31.75(11) . . . . ?
C1 N1 P1 Cl1 -118.63(12) . . . . ?
Si1 N1 P1 Cl1 65.02(11) . . . . ?
C1 N1 Si1 C19 19.62(14) . . . . ?
P1 N1 Si1 C19 -163.94(11) . . . . ?
C1 N1 Si1 C21 142.62(13) . . . . ?
P1 N1 Si1 C21 -40.94(14) . . . . ?
C1 N1 Si1 C20 -97.72(14) . . . . ?
P1 N1 Si1 C20 78.72(14) . . . . ?
P1 N1 C1 C6 -94.42(18) . . . . ?
Si1 N1 C1 C6 82.41(18) . . . . ?
P1 N1 C1 C2 94.82(18) . . . . ?
Si1 N1 C1 C2 -88.34(17) . . . . ?
C6 C1 C2 C3 -10.0(3) . . . . ?
N1 C1 C2 C3 160.85(17) . . . . ?
C6 C1 C2 C7 165.51(18) . . . . ?
N1 C1 C2 C7 -23.7(3) . . . . ?
C1 C2 C3 C4 1.8(3) . . . . ?
C7 C2 C3 C4 -174.08(19) . . . . ?
C2 C3 C4 C5 5.4(3) . . . . ?
C2 C3 C4 C11 -175.61(19) . . . . ?
C3 C4 C5 C6 -4.7(3) . . . . ?
C11 C4 C5 C6 176.29(19) . . . . ?
C4 C5 C6 C1 -3.2(3) . . . . ?
C4 C5 C6 C15 172.86(18) . . . . ?
C2 C1 C6 C5 10.6(3) . . . . ?
N1 C1 C6 C5 -160.14(17) . . . . ?
C2 C1 C6 C15 -164.57(18) . . . . ?
N1 C1 C6 C15 24.7(3) . . . . ?
C3 C2 C7 C8 -122.2(2) . . . . ?
C1 C2 C7 C8 62.3(3) . . . . ?
C3 C2 C7 C10 -3.1(3) . . . . ?
C1 C2 C7 C10 -178.57(19) . . . . ?
C3 C2 C7 C9 112.47(19) . . . . ?
C1 C2 C7 C9 -63.0(2) . . . . ?
C5 C4 C11 C14B 128.9(11) . . . . ?
C3 C4 C11 C14B -50.1(11) . . . . ?
C5 C4 C11 C14A -70.3(3) . . . . ?
C3 C4 C11 C14A 110.8(3) . . . . ?
C5 C4 C11 C12A 168.0(3) . . . . ?
C3 C4 C11 C12A -11.0(3) . . . . ?
C5 C4 C11 C13A 49.9(3) . . . . ?
C3 C4 C11 C13A -129.1(3) . . . . ?
C5 C4 C11 C12B 1.2(11) . . . . ?
C3 C4 C11 C12B -177.7(10) . . . . ?
C5 C4 C11 C13B -113.4(10) . . . . ?
C3 C4 C11 C13B 67.6(10) . . . . ?
C5 C6 C15 C18 -175.61(18) . . . . ?
C1 C6 C15 C18 -0.3(3) . . . . ?
C5 C6 C15 C17 60.2(2) . . . . ?
C1 C6 C15 C17 -124.4(2) . . . . ?
C5 C6 C15 C16 -57.2(2) . . . . ?
C1 C6 C15 C16 118.2(2) . . . . ?
 
_diffrn_measured_fraction_theta_max    0.999
_diffrn_reflns_theta_full              27.00
_diffrn_measured_fraction_theta_full   0.999
_refine_diff_density_max    0.285
_refine_diff_density_min   -0.256
_refine_diff_density_rms    0.058

#=============================================================================
 
data_av_aw72_(tms2NNPCl)2

_audit_author_name                'Villinger, A.' 
_audit_creation_method            SHELXL-97 

#==============================================================================

# CHEMICAL DATA

_chemical_name_systematic
;
1,3-dichloro-2,4-bis(bis-trimethylsilylamino)-cyclo-1,3-diphospha-2,4-diazane
;
_chemical_name_common             ?
_chemical_melting_point           ?
_chemical_formula_moiety          'C12 H36 Cl2 N4 P2 Si4'
_chemical_formula_sum
 'C12 H36 Cl2 N4 P2 Si4'
_chemical_formula_weight          481.65
 
loop_
 _atom_type_symbol
 _atom_type_description
 _atom_type_scat_dispersion_real
 _atom_type_scat_dispersion_imag
 _atom_type_scat_source
 'C'  'C'   0.0033   0.0016
 'International Tables Vol C Tables 4.2.6.8 and 6.1.1.4'
 'H'  'H'   0.0000   0.0000
 'International Tables Vol C Tables 4.2.6.8 and 6.1.1.4'
 'N'  'N'   0.0061   0.0033
 'International Tables Vol C Tables 4.2.6.8 and 6.1.1.4'
 'Si'  'Si'   0.0817   0.0704
 'International Tables Vol C Tables 4.2.6.8 and 6.1.1.4'
 'P'  'P'   0.1023   0.0942
 'International Tables Vol C Tables 4.2.6.8 and 6.1.1.4'
 'Cl'  'Cl'   0.1484   0.1585
 'International Tables Vol C Tables 4.2.6.8 and 6.1.1.4'
 
#==============================================================================

# CRYSTAL DATA
 
_symmetry_cell_setting            monoclinic
_symmetry_space_group_name_H-M    'P 2/n'
_symmetry_space_group_name_Hall   '-P 2yac'
_symmetry_Int_Tables_number       13
 
loop_
 _symmetry_equiv_pos_as_xyz
 'x, y, z'
 '-x+1/2, y, -z+1/2'
 '-x, -y, -z'
 'x-1/2, -y, z-1/2'
 
_cell_length_a                    13.0246(5)
_cell_length_b                    15.6553(6)
_cell_length_c                    13.0864(5)
_cell_angle_alpha                 90.00
_cell_angle_beta                  91.561(2)
_cell_angle_gamma                 90.00
_cell_volume                      2667.38(18)
_cell_formula_units_Z             4
_cell_measurement_temperature     173(2)
_cell_measurement_reflns_used     8172
_cell_measurement_theta_min       5.072
_cell_measurement_theta_max       52.523
 
_exptl_crystal_description        block
_exptl_crystal_colour             colourless
_exptl_crystal_size_max           0.38
_exptl_crystal_size_mid           0.18
_exptl_crystal_size_min           0.17
_exptl_crystal_density_meas       ?
_exptl_crystal_density_diffrn     1.199
_exptl_crystal_density_method     'not measured'
_exptl_crystal_F_000              1024
_exptl_absorpt_coefficient_mu     0.548
_exptl_absorpt_correction_type    'multi-scan'
_exptl_absorpt_correction_T_min   0.8188
_exptl_absorpt_correction_T_max   0.9126
_exptl_absorpt_process_details    '(SADABS; Sheldrick, 2004)'

#==============================================================================

# EXPERIMENTAL DATA
 
_exptl_special_details
;
 ?
;
 
_diffrn_ambient_temperature       173(2)
_diffrn_radiation_wavelength      0.71073
_diffrn_radiation_type            MoK\a
_diffrn_radiation_source          'sealed tube'
_diffrn_radiation_monochromator   graphite
_diffrn_measurement_device_type   'Bruker Apex Kappa II-CCD-diffractometer'
_diffrn_measurement_method        'phi and omega scans'
_diffrn_detector_area_resol_mean  ?
_diffrn_standards_number          ?
_diffrn_standards_interval_count  ?
_diffrn_standards_interval_time   ?
_diffrn_standards_decay_%         ?
_diffrn_reflns_number             31467
_diffrn_reflns_av_R_equivalents   0.0382
_diffrn_reflns_av_sigmaI/netI     0.0391
_diffrn_reflns_limit_h_min        -14
_diffrn_reflns_limit_h_max        17
_diffrn_reflns_limit_k_min        -20
_diffrn_reflns_limit_k_max        20
_diffrn_reflns_limit_l_min        -17
_diffrn_reflns_limit_l_max        17
_diffrn_reflns_theta_min          1.30
_diffrn_reflns_theta_max          28.00
_reflns_number_total              6433
_reflns_number_gt                 4719
_reflns_threshold_expression      >2\s(I)
 
_computing_data_collection        'Bruker Apex V7.51A'
_computing_cell_refinement        'Bruker Apex V7.51A'
_computing_data_reduction         'Bruker SAINT'
_computing_structure_solution     'SHELXS-97 (Sheldrick, 1997)'
_computing_structure_refinement   'SHELXL-97 (Sheldrick, 1997)'
_computing_molecular_graphics     'ORTEP-3v2.01 (Farrugia, 1997)' 
_computing_publication_material   'SHELXL-97'

#==============================================================================

# REFINEMENT DATA 

_refine_special_details
;
 All H atoms were positioned geometrically and refined using a riding model, 
 with C---H = 0.98 (methyl groups), 0.99\%A (methylene groups), 
 1.00\%A (methine groups) or 0.95 \%A (aryl CH) and with <i>U</i>~iso~(H) = 
 1.5 times <i>U</i>~eq~(C) (methyl groups) or with <i>U</i>~iso~(H) = 1.2 times 
 <i>U</i>~eq~(C) (methylene  groups, aryl CH, methine groups). Torsion angles 
 of all methyl groups were allowed to refine.
 
 Refinement of F^2^ against ALL reflections.  The weighted R-factor wR and
 goodness of fit S are based on F^2^, conventional R-factors R are based
 on F, with F set to zero for negative F^2^. The threshold expression of
 F^2^ > 2\s(F^2^) is used only for calculating R-factors(gt) etc. and is
 not relevant to the choice of reflections for refinement.  R-factors based
 on F^2^ are statistically about twice as large as those based on F, and R-
 factors based on ALL data will be even larger.
;
 
_refine_ls_structure_factor_coef  Fsqd
_refine_ls_matrix_type            full
_refine_ls_weighting_scheme       calc
_refine_ls_weighting_details
 'calc w=1/[\s^2^(Fo^2^)+(0.0802P)^2^+0.0000P] where P=(Fo^2^+2Fc^2^)/3'
_atom_sites_solution_primary      direct
_atom_sites_solution_secondary    difmap
_atom_sites_solution_hydrogens    geom
_refine_ls_hydrogen_treatment     constr
_refine_ls_extinction_method      none
_refine_ls_extinction_coef        ?
_refine_ls_number_reflns          6433
_refine_ls_number_parameters      232
_refine_ls_number_restraints      0
_refine_ls_R_factor_all           0.0759
_refine_ls_R_factor_gt            0.0492
_refine_ls_wR_factor_ref          0.1344
_refine_ls_wR_factor_gt           0.1237
_refine_ls_goodness_of_fit_ref    1.042
_refine_ls_restrained_S_all       1.042
_refine_ls_shift/su_max           0.001
_refine_ls_shift/su_mean          0.000

#==============================================================================

# ATOMIC COORDINATES AND DISPLACEMENT PARAMETERS
 
loop_
 _atom_site_label
 _atom_site_type_symbol
 _atom_site_fract_x
 _atom_site_fract_y
 _atom_site_fract_z
 _atom_site_U_iso_or_equiv
 _atom_site_adp_type
 _atom_site_occupancy
 _atom_site_symmetry_multiplicity
 _atom_site_calc_flag
 _atom_site_refinement_flags
 _atom_site_disorder_assembly
 _atom_site_disorder_group
P1 P 0.24904(5) 0.48759(4) 0.15078(5) 0.03577(17) Uani 1 1 d . . .
Cl1 Cl 0.25274(7) 0.60309(6) 0.07054(8) 0.0753(3) Uani 1 1 d . . .
N1 N 0.16633(14) 0.50072(13) 0.24824(16) 0.0325(5) Uani 1 1 d . . .
N2 N 0.05790(15) 0.48722(14) 0.24648(17) 0.0368(5) Uani 1 1 d . . .
Si1 Si -0.01915(6) 0.57830(5) 0.26003(8) 0.0489(2) Uani 1 1 d . . .
Si2 Si 0.01803(6) 0.38004(5) 0.23447(6) 0.03892(19) Uani 1 1 d . . .
C1 C -0.1296(3) 0.5691(3) 0.1679(3) 0.0744(11) Uani 1 1 d . . .
H1A H -0.1042 0.5569 0.0996 0.112 Uiso 1 1 calc R . .
H1B H -0.1680 0.6229 0.1663 0.112 Uiso 1 1 calc R . .
H1C H -0.1747 0.5226 0.1891 0.112 Uiso 1 1 calc R . .
C2 C 0.0537(3) 0.6759(2) 0.2286(4) 0.0817(13) Uani 1 1 d . . .
H2A H 0.1177 0.6776 0.2696 0.123 Uiso 1 1 calc R . .
H2B H 0.0123 0.7264 0.2437 0.123 Uiso 1 1 calc R . .
H2C H 0.0696 0.6755 0.1558 0.123 Uiso 1 1 calc R . .
C3 C -0.0667(3) 0.5858(3) 0.3919(3) 0.0747(11) Uani 1 1 d . . .
H3A H -0.1047 0.5337 0.4082 0.112 Uiso 1 1 calc R . .
H3B H -0.1122 0.6353 0.3971 0.112 Uiso 1 1 calc R . .
H3C H -0.0084 0.5922 0.4401 0.112 Uiso 1 1 calc R . .
C4 C -0.1115(3) 0.3671(3) 0.2847(5) 0.109(2) Uani 1 1 d . . .
H4A H -0.1176 0.4012 0.3471 0.163 Uiso 1 1 calc R . .
H4B H -0.1234 0.3067 0.3004 0.163 Uiso 1 1 calc R . .
H4C H -0.1626 0.3864 0.2334 0.163 Uiso 1 1 calc R . .
C5 C 0.1064(3) 0.3096(2) 0.3088(3) 0.0776(13) Uani 1 1 d . . .
H5A H 0.1772 0.3200 0.2884 0.116 Uiso 1 1 calc R . .
H5B H 0.0884 0.2498 0.2955 0.116 Uiso 1 1 calc R . .
H5C H 0.1005 0.3217 0.3819 0.116 Uiso 1 1 calc R . .
C6 C 0.0196(4) 0.3455(3) 0.1001(3) 0.0855(13) Uani 1 1 d . . .
H6A H -0.0265 0.3820 0.0588 0.128 Uiso 1 1 calc R . .
H6B H -0.0034 0.2860 0.0949 0.128 Uiso 1 1 calc R . .
H6C H 0.0896 0.3502 0.0750 0.128 Uiso 1 1 calc R . .
P2 P 0.15029(6) 0.00474(5) 0.74820(5) 0.03584(17) Uani 1 1 d . . .
Cl2 Cl 0.06806(9) -0.11046(6) 0.75138(7) 0.0794(3) Uani 1 1 d . . .
N3 N 0.25029(16) -0.00880(13) 0.83282(14) 0.0329(5) Uani 1 1 d . . .
N4 N 0.24993(18) 0.00483(14) 0.94097(14) 0.0390(5) Uani 1 1 d . . .
Si3 Si 0.26597(7) 0.11135(6) 0.98015(6) 0.0472(2) Uani 1 1 d . . .
Si4 Si 0.23510(8) -0.08697(6) 1.01611(6) 0.0572(3) Uani 1 1 d . . .
C7 C 0.4028(3) 0.1434(3) 0.9749(4) 0.0921(14) Uani 1 1 d . . .
H7A H 0.4447 0.1049 1.0178 0.138 Uiso 1 1 calc R . .
H7B H 0.4107 0.2021 0.9999 0.138 Uiso 1 1 calc R . .
H7C H 0.4253 0.1402 0.9041 0.138 Uiso 1 1 calc R . .
C8 C 0.1928(4) 0.1843(2) 0.8944(3) 0.0862(13) Uani 1 1 d . . .
H8A H 0.2255 0.1866 0.8278 0.129 Uiso 1 1 calc R . .
H8B H 0.1920 0.2416 0.9244 0.129 Uiso 1 1 calc R . .
H8C H 0.1222 0.1634 0.8854 0.129 Uiso 1 1 calc R . .
C9 C 0.2158(4) 0.1239(3) 1.1097(3) 0.0874(14) Uani 1 1 d . . .
H9A H 0.1476 0.0977 1.1124 0.131 Uiso 1 1 calc R . .
H9B H 0.2108 0.1848 1.1261 0.131 Uiso 1 1 calc R . .
H9C H 0.2623 0.0959 1.1593 0.131 Uiso 1 1 calc R . .
C10 C 0.1018(3) -0.0934(3) 1.0625(4) 0.0834(13) Uani 1 1 d . . .
H10A H 0.0874 -0.0430 1.1043 0.125 Uiso 1 1 calc R . .
H10B H 0.0943 -0.1451 1.1039 0.125 Uiso 1 1 calc R . .
H10C H 0.0534 -0.0954 1.0040 0.125 Uiso 1 1 calc R . .
C11 C 0.2690(4) -0.1828(2) 0.9417(3) 0.1016(17) Uani 1 1 d . . .
H11A H 0.2276 -0.1843 0.8780 0.152 Uiso 1 1 calc R . .
H11B H 0.2554 -0.2342 0.9819 0.152 Uiso 1 1 calc R . .
H11C H 0.3420 -0.1808 0.9256 0.152 Uiso 1 1 calc R . .
C12 C 0.3273(4) -0.0795(3) 1.1273(3) 0.1046(18) Uani 1 1 d . . .
H12A H 0.3957 -0.0650 1.1031 0.157 Uiso 1 1 calc R . .
H12B H 0.3303 -0.1345 1.1630 0.157 Uiso 1 1 calc R . .
H12C H 0.3044 -0.0351 1.1743 0.157 Uiso 1 1 calc R . .
 
loop_
 _atom_site_aniso_label
 _atom_site_aniso_U_11
 _atom_site_aniso_U_22
 _atom_site_aniso_U_33
 _atom_site_aniso_U_23
 _atom_site_aniso_U_13
 _atom_site_aniso_U_12
P1 0.0286(4) 0.0365(4) 0.0422(4) 0.0064(3) 0.0020(3) -0.0024(3)
Cl1 0.0665(6) 0.0682(6) 0.0915(7) 0.0469(5) 0.0083(5) -0.0026(4)
N1 0.0212(10) 0.0300(10) 0.0461(12) 0.0039(9) 0.0009(8) 0.0001(8)
N2 0.0203(10) 0.0312(11) 0.0590(14) 0.0072(10) 0.0027(9) -0.0004(8)
Si1 0.0320(4) 0.0352(4) 0.0798(6) 0.0145(4) 0.0061(4) 0.0093(3)
Si2 0.0336(4) 0.0328(4) 0.0503(4) 0.0061(3) 0.0010(3) -0.0082(3)
C1 0.0424(19) 0.093(3) 0.088(3) 0.040(2) -0.0013(18) 0.0146(18)
C2 0.057(2) 0.0322(17) 0.157(4) 0.017(2) 0.015(2) 0.0105(15)
C3 0.070(2) 0.071(2) 0.083(3) -0.015(2) 0.005(2) 0.027(2)
C4 0.063(3) 0.058(2) 0.208(6) -0.007(3) 0.063(3) -0.023(2)
C5 0.103(3) 0.0287(16) 0.099(3) 0.0117(18) -0.039(2) -0.0107(18)
C6 0.124(4) 0.068(2) 0.064(2) 0.0031(19) -0.006(2) -0.026(2)
P2 0.0440(4) 0.0382(4) 0.0255(3) 0.0004(3) 0.0026(3) -0.0062(3)
Cl2 0.1006(8) 0.0750(6) 0.0636(5) -0.0112(5) 0.0167(5) -0.0546(6)
N3 0.0502(14) 0.0295(11) 0.0193(9) 0.0008(8) 0.0033(8) 0.0014(9)
N4 0.0633(15) 0.0381(12) 0.0157(9) -0.0012(8) 0.0035(9) 0.0005(11)
Si3 0.0586(5) 0.0466(5) 0.0368(4) -0.0179(3) 0.0101(4) -0.0049(4)
Si4 0.0862(7) 0.0526(5) 0.0335(4) 0.0194(4) 0.0151(4) 0.0200(5)
C7 0.079(3) 0.098(3) 0.101(3) -0.041(3) 0.023(2) -0.025(2)
C8 0.140(4) 0.0341(18) 0.085(3) -0.0088(18) 0.000(3) 0.018(2)
C9 0.127(4) 0.089(3) 0.048(2) -0.034(2) 0.030(2) -0.019(3)
C10 0.088(3) 0.077(3) 0.087(3) 0.041(2) 0.019(2) -0.003(2)
C11 0.189(5) 0.039(2) 0.079(3) 0.0267(19) 0.044(3) 0.027(3)
C12 0.104(3) 0.168(5) 0.0426(19) 0.031(3) 0.009(2) 0.072(3)

#==============================================================================

# MOLECULAR GEOMETRY
 
_geom_special_details
;
 All s.u.'s (except the s.u. in the dihedral angle between two l.s. planes)
 are estimated using the full covariance matrix.  The cell s.u.'s are taken
 into account individually in the estimation of s.u.'s in distances, angles
 and torsion angles; correlations between s.u.'s in cell parameters are only
 used when they are defined by crystal symmetry.  An approximate (isotropic)
 treatment of cell s.u.'s is used for estimating s.u.'s involving l.s. planes.
;
 
loop_
 _geom_bond_atom_site_label_1
 _geom_bond_atom_site_label_2
 _geom_bond_distance
 _geom_bond_site_symmetry_2
 _geom_bond_publ_flag
P1 N1 1.704(2) . ?
P1 N1 1.710(2) 2 ?
P1 Cl1 2.0922(11) . ?
P1 P1 2.5962(14) 2 ?
N1 N2 1.427(3) . ?
N1 P1 1.710(2) 2 ?
N2 Si1 1.755(2) . ?
N2 Si2 1.762(2) . ?
Si1 C2 1.851(3) . ?
Si1 C3 1.853(4) . ?
Si1 C1 1.857(4) . ?
Si2 C4 1.839(4) . ?
Si2 C6 1.841(4) . ?
Si2 C5 1.852(3) . ?
C1 H1A 0.9800 . ?
C1 H1B 0.9800 . ?
C1 H1C 0.9800 . ?
C2 H2A 0.9800 . ?
C2 H2B 0.9800 . ?
C2 H2C 0.9800 . ?
C3 H3A 0.9800 . ?
C3 H3B 0.9800 . ?
C3 H3C 0.9800 . ?
C4 H4A 0.9800 . ?
C4 H4B 0.9800 . ?
C4 H4C 0.9800 . ?
C5 H5A 0.9800 . ?
C5 H5B 0.9800 . ?
C5 H5C 0.9800 . ?
C6 H6A 0.9800 . ?
C6 H6B 0.9800 . ?
C6 H6C 0.9800 . ?
P2 N3 1.700(2) . ?
P2 N3 1.709(2) 2_556 ?
P2 Cl2 2.0986(11) . ?
P2 P2 2.5966(14) 2_556 ?
N3 N4 1.431(2) . ?
N3 P2 1.709(2) 2_556 ?
N4 Si4 1.755(2) . ?
N4 Si3 1.755(2) . ?
Si3 C9 1.844(3) . ?
Si3 C8 1.848(4) . ?
Si3 C7 1.855(4) . ?
Si4 C11 1.849(4) . ?
Si4 C10 1.858(4) . ?
Si4 C12 1.865(4) . ?
C7 H7A 0.9800 . ?
C7 H7B 0.9800 . ?
C7 H7C 0.9800 . ?
C8 H8A 0.9800 . ?
C8 H8B 0.9800 . ?
C8 H8C 0.9800 . ?
C9 H9A 0.9800 . ?
C9 H9B 0.9800 . ?
C9 H9C 0.9800 . ?
C10 H10A 0.9800 . ?
C10 H10B 0.9800 . ?
C10 H10C 0.9800 . ?
C11 H11A 0.9800 . ?
C11 H11B 0.9800 . ?
C11 H11C 0.9800 . ?
C12 H12A 0.9800 . ?
C12 H12B 0.9800 . ?
C12 H12C 0.9800 . ?
 
loop_
 _geom_angle_atom_site_label_1
 _geom_angle_atom_site_label_2
 _geom_angle_atom_site_label_3
 _geom_angle
 _geom_angle_site_symmetry_1
 _geom_angle_site_symmetry_3
 _geom_angle_publ_flag
N1 P1 N1 79.31(10) . 2 ?
N1 P1 Cl1 107.16(8) . . ?
N1 P1 Cl1 105.12(8) 2 . ?
N1 P1 P1 40.58(7) . 2 ?
N1 P1 P1 40.42(7) 2 2 ?
Cl1 P1 P1 120.15(4) . 2 ?
N2 N1 P1 127.98(17) . . ?
N2 N1 P1 127.68(17) . 2 ?
P1 N1 P1 99.00(10) . 2 ?
N1 N2 Si1 116.50(16) . . ?
N1 N2 Si2 115.55(16) . . ?
Si1 N2 Si2 127.92(12) . . ?
N2 Si1 C2 110.51(13) . . ?
N2 Si1 C3 110.60(14) . . ?
C2 Si1 C3 110.0(2) . . ?
N2 Si1 C1 107.82(16) . . ?
C2 Si1 C1 108.19(19) . . ?
C3 Si1 C1 109.70(19) . . ?
N2 Si2 C4 110.14(15) . . ?
N2 Si2 C6 110.72(15) . . ?
C4 Si2 C6 110.1(2) . . ?
N2 Si2 C5 110.05(13) . . ?
C4 Si2 C5 108.0(2) . . ?
C6 Si2 C5 107.7(2) . . ?
Si1 C1 H1A 109.5 . . ?
Si1 C1 H1B 109.5 . . ?
H1A C1 H1B 109.5 . . ?
Si1 C1 H1C 109.5 . . ?
H1A C1 H1C 109.5 . . ?
H1B C1 H1C 109.5 . . ?
Si1 C2 H2A 109.5 . . ?
Si1 C2 H2B 109.5 . . ?
H2A C2 H2B 109.5 . . ?
Si1 C2 H2C 109.5 . . ?
H2A C2 H2C 109.5 . . ?
H2B C2 H2C 109.5 . . ?
Si1 C3 H3A 109.5 . . ?
Si1 C3 H3B 109.5 . . ?
H3A C3 H3B 109.5 . . ?
Si1 C3 H3C 109.5 . . ?
H3A C3 H3C 109.5 . . ?
H3B C3 H3C 109.5 . . ?
Si2 C4 H4A 109.5 . . ?
Si2 C4 H4B 109.5 . . ?
H4A C4 H4B 109.5 . . ?
Si2 C4 H4C 109.5 . . ?
H4A C4 H4C 109.5 . . ?
H4B C4 H4C 109.5 . . ?
Si2 C5 H5A 109.5 . . ?
Si2 C5 H5B 109.5 . . ?
H5A C5 H5B 109.5 . . ?
Si2 C5 H5C 109.5 . . ?
H5A C5 H5C 109.5 . . ?
H5B C5 H5C 109.5 . . ?
Si2 C6 H6A 109.5 . . ?
Si2 C6 H6B 109.5 . . ?
H6A C6 H6B 109.5 . . ?
Si2 C6 H6C 109.5 . . ?
H6A C6 H6C 109.5 . . ?
H6B C6 H6C 109.5 . . ?
N3 P2 N3 78.96(10) . 2_556 ?
N3 P2 Cl2 105.20(8) . . ?
N3 P2 Cl2 107.54(8) 2_556 . ?
N3 P2 P2 40.52(7) . 2_556 ?
N3 P2 P2 40.25(7) 2_556 2_556 ?
Cl2 P2 P2 120.69(4) . 2_556 ?
N4 N3 P2 127.05(17) . . ?
N4 N3 P2 128.16(17) . 2_556 ?
P2 N3 P2 99.23(10) . 2_556 ?
N3 N4 Si4 115.80(16) . . ?
N3 N4 Si3 115.27(16) . . ?
Si4 N4 Si3 128.93(11) . . ?
N4 Si3 C9 109.12(15) . . ?
N4 Si3 C8 110.77(15) . . ?
C9 Si3 C8 107.6(2) . . ?
N4 Si3 C7 110.68(16) . . ?
C9 Si3 C7 111.7(2) . . ?
C8 Si3 C7 106.9(2) . . ?
N4 Si4 C11 109.75(14) . . ?
N4 Si4 C10 110.22(14) . . ?
C11 Si4 C10 111.5(2) . . ?
N4 Si4 C12 107.90(19) . . ?
C11 Si4 C12 107.7(2) . . ?
C10 Si4 C12 109.6(2) . . ?
Si3 C7 H7A 109.5 . . ?
Si3 C7 H7B 109.5 . . ?
H7A C7 H7B 109.5 . . ?
Si3 C7 H7C 109.5 . . ?
H7A C7 H7C 109.5 . . ?
H7B C7 H7C 109.5 . . ?
Si3 C8 H8A 109.5 . . ?
Si3 C8 H8B 109.5 . . ?
H8A C8 H8B 109.5 . . ?
Si3 C8 H8C 109.5 . . ?
H8A C8 H8C 109.5 . . ?
H8B C8 H8C 109.5 . . ?
Si3 C9 H9A 109.5 . . ?
Si3 C9 H9B 109.5 . . ?
H9A C9 H9B 109.5 . . ?
Si3 C9 H9C 109.5 . . ?
H9A C9 H9C 109.5 . . ?
H9B C9 H9C 109.5 . . ?
Si4 C10 H10A 109.5 . . ?
Si4 C10 H10B 109.5 . . ?
H10A C10 H10B 109.5 . . ?
Si4 C10 H10C 109.5 . . ?
H10A C10 H10C 109.5 . . ?
H10B C10 H10C 109.5 . . ?
Si4 C11 H11A 109.5 . . ?
Si4 C11 H11B 109.5 . . ?
H11A C11 H11B 109.5 . . ?
Si4 C11 H11C 109.5 . . ?
H11A C11 H11C 109.5 . . ?
H11B C11 H11C 109.5 . . ?
Si4 C12 H12A 109.5 . . ?
Si4 C12 H12B 109.5 . . ?
H12A C12 H12B 109.5 . . ?
Si4 C12 H12C 109.5 . . ?
H12A C12 H12C 109.5 . . ?
H12B C12 H12C 109.5 . . ?
 
loop_
 _geom_torsion_atom_site_label_1
 _geom_torsion_atom_site_label_2
 _geom_torsion_atom_site_label_3
 _geom_torsion_atom_site_label_4
 _geom_torsion
 _geom_torsion_site_symmetry_1
 _geom_torsion_site_symmetry_2
 _geom_torsion_site_symmetry_3
 _geom_torsion_site_symmetry_4
 _geom_torsion_publ_flag
N1 P1 N1 N2 -169.25(16) 2 . . . ?
Cl1 P1 N1 N2 88.1(2) . . . . ?
P1 P1 N1 N2 -155.3(3) 2 . . . ?
N1 P1 N1 P1 -13.91(15) 2 . . 2 ?
Cl1 P1 N1 P1 -116.59(9) . . . 2 ?
P1 N1 N2 Si1 -112.83(19) . . . . ?
P1 N1 N2 Si1 98.5(2) 2 . . . ?
P1 N1 N2 Si2 68.9(2) . . . . ?
P1 N1 N2 Si2 -79.8(2) 2 . . . ?
N1 N2 Si1 C2 20.0(3) . . . . ?
Si2 N2 Si1 C2 -162.0(2) . . . . ?
N1 N2 Si1 C3 -102.0(2) . . . . ?
Si2 N2 Si1 C3 76.0(2) . . . . ?
N1 N2 Si1 C1 138.0(2) . . . . ?
Si2 N2 Si1 C1 -43.9(2) . . . . ?
N1 N2 Si2 C4 156.9(3) . . . . ?
Si1 N2 Si2 C4 -21.2(3) . . . . ?
N1 N2 Si2 C6 -81.1(2) . . . . ?
Si1 N2 Si2 C6 100.9(2) . . . . ?
N1 N2 Si2 C5 37.9(2) . . . . ?
Si1 N2 Si2 C5 -140.2(2) . . . . ?
N3 P2 N3 N4 169.45(16) 2_556 . . . ?
Cl2 P2 N3 N4 -85.2(2) . . . . ?
P2 P2 N3 N4 155.1(3) 2_556 . . . ?
N3 P2 N3 P2 14.37(14) 2_556 . . 2_556 ?
Cl2 P2 N3 P2 119.75(9) . . . 2_556 ?
P2 N3 N4 Si4 98.9(2) . . . . ?
P2 N3 N4 Si4 -113.05(19) 2_556 . . . ?
P2 N3 N4 Si3 -81.8(2) . . . . ?
P2 N3 N4 Si3 66.2(2) 2_556 . . . ?
N3 N4 Si3 C9 158.7(2) . . . . ?
Si4 N4 Si3 C9 -22.2(3) . . . . ?
N3 N4 Si3 C8 40.4(3) . . . . ?
Si4 N4 Si3 C8 -140.5(2) . . . . ?
N3 N4 Si3 C7 -78.0(3) . . . . ?
Si4 N4 Si3 C7 101.2(2) . . . . ?
N3 N4 Si4 C11 20.0(3) . . . . ?
Si3 N4 Si4 C11 -159.2(2) . . . . ?
N3 N4 Si4 C10 -103.2(2) . . . . ?
Si3 N4 Si4 C10 77.6(2) . . . . ?
N3 N4 Si4 C12 137.1(2) . . . . ?
Si3 N4 Si4 C12 -42.1(2) . . . . ?
 
_diffrn_measured_fraction_theta_max    0.998
_diffrn_reflns_theta_full              28.00
_diffrn_measured_fraction_theta_full   0.998
_refine_diff_density_max    0.619
_refine_diff_density_min   -0.333
_refine_diff_density_rms    0.068

#=============================================================================
 
data_av_aw93_(tmsNPORf)2

_audit_author_name                'Villinger, A.' 
_audit_creation_method            SHELXL-97 

#==============================================================================

# CHEMICAL DATA

_chemical_name_systematic
;
1,3-bis(1,1,1,3,3,3-hexafluoro-2-propoxy)-2,4-bis(trimethylsilyl)-cyclo-
1,3-diphospha-2,4-diazane
;
_chemical_name_common             ?
_chemical_melting_point           ?
_chemical_formula_moiety          'C12 H20 F12 N2 O2 P2 Si2'
_chemical_formula_sum
 'C12 H20 F12 N2 O2 P2 Si2'
_chemical_formula_weight          570.42
 
loop_
 _atom_type_symbol
 _atom_type_description
 _atom_type_scat_dispersion_real
 _atom_type_scat_dispersion_imag
 _atom_type_scat_source
 'C'  'C'   0.0033   0.0016
 'International Tables Vol C Tables 4.2.6.8 and 6.1.1.4'
 'H'  'H'   0.0000   0.0000
 'International Tables Vol C Tables 4.2.6.8 and 6.1.1.4'
 'N'  'N'   0.0061   0.0033
 'International Tables Vol C Tables 4.2.6.8 and 6.1.1.4'
 'Si'  'Si'   0.0817   0.0704
 'International Tables Vol C Tables 4.2.6.8 and 6.1.1.4'
 'P'  'P'   0.1023   0.0942
 'International Tables Vol C Tables 4.2.6.8 and 6.1.1.4'
 'O'  'O'   0.0106   0.0060
 'International Tables Vol C Tables 4.2.6.8 and 6.1.1.4'
 'F'  'F'   0.0171   0.0103
 'International Tables Vol C Tables 4.2.6.8 and 6.1.1.4'
 
#==============================================================================

# CRYSTAL DATA
 
_symmetry_cell_setting            monoclinic
_symmetry_space_group_name_H-M    'C 2/c'
_symmetry_space_group_name_Hall   '-C 2yc'
_symmetry_Int_Tables_number       15
 
loop_
 _symmetry_equiv_pos_as_xyz
 'x, y, z'
 '-x, y, -z+1/2'
 'x+1/2, y+1/2, z'
 '-x+1/2, y+1/2, -z+1/2'
 '-x, -y, -z'
 'x, -y, z-1/2'
 '-x+1/2, -y+1/2, -z'
 'x+1/2, -y+1/2, z-1/2'
 
_cell_length_a                    20.2530(16)
_cell_length_b                    8.7053(7)
_cell_length_c                    13.4567(11)
_cell_angle_alpha                 90.00
_cell_angle_beta                  96.091(4)
_cell_angle_gamma                 90.00
_cell_volume                      2359.1(3)
_cell_formula_units_Z             4
_cell_measurement_temperature     173(2)
_cell_measurement_reflns_used     5125
_cell_measurement_theta_min       5.098
_cell_measurement_theta_max       53.038
 
_exptl_crystal_description        block
_exptl_crystal_colour             colourless
_exptl_crystal_size_max           0.35
_exptl_crystal_size_mid           0.32
_exptl_crystal_size_min           0.13
_exptl_crystal_density_meas       ?
_exptl_crystal_density_diffrn     1.606
_exptl_crystal_density_method     'not measured'
_exptl_crystal_F_000              1152
_exptl_absorpt_coefficient_mu     0.392
_exptl_absorpt_correction_type    'multi-scan'
_exptl_absorpt_correction_T_min   0.8750
_exptl_absorpt_correction_T_max   0.9508
_exptl_absorpt_process_details    '(SADABS; Sheldrick, 2004)'

#==============================================================================

# EXPERIMENTAL DATA
 
_exptl_special_details
;
 ?
;
 
_diffrn_ambient_temperature       173(2)
_diffrn_radiation_wavelength      0.71073
_diffrn_radiation_type            MoK\a
_diffrn_radiation_source          'sealed tube'
_diffrn_radiation_monochromator   graphite
_diffrn_measurement_device_type   'Bruker Apex Kappa II-CCD-diffractometer'
_diffrn_measurement_method        'phi and omega scans'
_diffrn_detector_area_resol_mean  ?
_diffrn_standards_number          ?
_diffrn_standards_interval_count  ?
_diffrn_standards_interval_time   ?
_diffrn_standards_decay_%         ?
_diffrn_reflns_number             19529
_diffrn_reflns_av_R_equivalents   0.0348
_diffrn_reflns_av_sigmaI/netI     0.0425
_diffrn_reflns_limit_h_min        -30
_diffrn_reflns_limit_h_max        28
_diffrn_reflns_limit_k_min        -9
_diffrn_reflns_limit_k_max        12
_diffrn_reflns_limit_l_min        -20
_diffrn_reflns_limit_l_max        20
_diffrn_reflns_theta_min          2.55
_diffrn_reflns_theta_max          32.00
_reflns_number_total              4093
_reflns_number_gt                 2620
_reflns_threshold_expression      >2\s(I)
 
_computing_data_collection        'Bruker Apex V7.51A'
_computing_cell_refinement        'Bruker Apex V7.51A'
_computing_data_reduction         'Bruker SAINT'
_computing_structure_solution     'SHELXS-97 (Sheldrick, 1997)'
_computing_structure_refinement   'SHELXL-97 (Sheldrick, 1997)'
_computing_molecular_graphics     'ORTEP-3v2.01 (Farrugia, 1997)' 
_computing_publication_material   'SHELXL-97'

#==============================================================================

# REFINEMENT DATA 

_refine_special_details
;
 All H atoms were positioned geometrically and refined using a riding model, 
 with C---H = 0.98 (methyl groups), 0.99\%A (methylene groups), 
 1.00\%A (methine groups) or 0.95 \%A (aryl CH) and with <i>U</i>~iso~(H) = 
 1.5 times <i>U</i>~eq~(C) (methyl groups) or with <i>U</i>~iso~(H) = 1.2 times 
 <i>U</i>~eq~(C) (methylene  groups, aryl CH, methine groups). Torsion angles 
 of all methyl groups were allowed to refine.
 
 Refinement of F^2^ against ALL reflections.  The weighted R-factor wR and
 goodness of fit S are based on F^2^, conventional R-factors R are based
 on F, with F set to zero for negative F^2^. The threshold expression of
 F^2^ > 2\s(F^2^) is used only for calculating R-factors(gt) etc. and is
 not relevant to the choice of reflections for refinement.  R-factors based
 on F^2^ are statistically about twice as large as those based on F, and R-
 factors based on ALL data will be even larger.
;
 
_refine_ls_structure_factor_coef  Fsqd
_refine_ls_matrix_type            full
_refine_ls_weighting_scheme       calc
_refine_ls_weighting_details
 'calc w=1/[\s^2^(Fo^2^)+(0.0501P)^2^+0.0000P] where P=(Fo^2^+2Fc^2^)/3'
_atom_sites_solution_primary      direct
_atom_sites_solution_secondary    difmap
_atom_sites_solution_hydrogens    geom
_refine_ls_hydrogen_treatment     constr
_refine_ls_extinction_method      none
_refine_ls_extinction_coef        ?
_refine_ls_number_reflns          4093
_refine_ls_number_parameters      212
_refine_ls_number_restraints      21
_refine_ls_R_factor_all           0.0779
_refine_ls_R_factor_gt            0.0378
_refine_ls_wR_factor_ref          0.0971
_refine_ls_wR_factor_gt           0.0879
_refine_ls_goodness_of_fit_ref    1.008
_refine_ls_restrained_S_all       1.008
_refine_ls_shift/su_max           0.001
_refine_ls_shift/su_mean          0.000

#==============================================================================

# ATOMIC COORDINATES AND DISPLACEMENT PARAMETERS
 
loop_
 _atom_site_label
 _atom_site_type_symbol
 _atom_site_fract_x
 _atom_site_fract_y
 _atom_site_fract_z
 _atom_site_U_iso_or_equiv
 _atom_site_adp_type
 _atom_site_occupancy
 _atom_site_symmetry_multiplicity
 _atom_site_calc_flag
 _atom_site_refinement_flags
 _atom_site_disorder_assembly
 _atom_site_disorder_group
P1 P 0.296891(16) 0.15396(4) 0.01232(2) 0.02709(10) Uani 1 1 d . . .
N1 N 0.27922(5) 0.33194(13) 0.05460(8) 0.0293(3) Uani 1 1 d . . .
Si1 Si 0.322213(18) 0.45184(4) 0.14517(3) 0.02965(11) Uani 1 1 d . . .
O1 O 0.34311(4) 0.18984(11) -0.08200(7) 0.0321(2) Uani 1 1 d . . .
C1A C 0.4076(6) 0.1274(10) -0.0734(9) 0.0326(9) Uani 0.65(2) 1 d PD A 1
H1A H 0.4207 0.0983 -0.0021 0.039 Uiso 0.65(2) 1 calc PR A 1
C2A C 0.4539(3) 0.2528(12) -0.1028(6) 0.0500(13) Uani 0.65(2) 1 d PD A 1
C3A C 0.4095(4) -0.0150(10) -0.1382(6) 0.0413(13) Uani 0.65(2) 1 d PD A 1
F1A F 0.3925(8) 0.0145(16) -0.2338(7) 0.058(2) Uani 0.65(2) 1 d PD A 1
F2A F 0.4695(4) -0.0798(11) -0.1271(7) 0.0822(19) Uani 0.65(2) 1 d PD A 1
F3A F 0.3676(5) -0.1193(9) -0.1114(6) 0.0682(13) Uani 0.65(2) 1 d PD A 1
F4A F 0.4399(4) 0.2996(11) -0.1948(5) 0.076(2) Uani 0.65(2) 1 d PD A 1
F5A F 0.5168(2) 0.2044(15) -0.0958(5) 0.087(2) Uani 0.65(2) 1 d PD A 1
F6A F 0.4526(6) 0.3737(12) -0.0446(6) 0.101(2) Uani 0.65(2) 1 d PD A 1
C1B C 0.4108(11) 0.1556(17) -0.0705(17) 0.0326(9) Uani 0.35(2) 1 d PD A 2
H1B H 0.4252 0.1343 0.0016 0.039 Uiso 0.35(2) 1 calc PR A 2
C2B C 0.4485(7) 0.2928(16) -0.1039(11) 0.0500(13) Uani 0.35(2) 1 d PD A 2
C3B C 0.4214(7) 0.0160(18) -0.1304(12) 0.0413(13) Uani 0.35(2) 1 d PD A 2
F1B F 0.4020(14) 0.024(3) -0.2278(11) 0.050(2) Uani 0.35(2) 1 d PD A 2
F2B F 0.4844(6) -0.0271(19) -0.1251(12) 0.071(3) Uani 0.35(2) 1 d PD A 2
F3B F 0.3877(9) -0.1005(17) -0.0955(12) 0.070(2) Uani 0.35(2) 1 d PD A 2
F4B F 0.4386(6) 0.3152(17) -0.2015(7) 0.047(2) Uani 0.35(2) 1 d PD A 2
F5B F 0.5122(4) 0.2730(15) -0.0754(11) 0.079(3) Uani 0.35(2) 1 d PD A 2
F6B F 0.4310(5) 0.4165(10) -0.0594(7) 0.0603(19) Uani 0.35(2) 1 d PD A 2
C4 C 0.40575(8) 0.36507(19) 0.17580(12) 0.0451(4) Uani 1 1 d . . .
H4A H 0.4018 0.2529 0.1757 0.068 Uiso 1 1 calc R . .
H4B H 0.4246 0.4000 0.2420 0.068 Uiso 1 1 calc R . .
H4C H 0.4349 0.3966 0.1258 0.068 Uiso 1 1 calc R . .
C5 C 0.32531(9) 0.64400(19) 0.08857(14) 0.0518(4) Uani 1 1 d . . .
H5A H 0.3486 0.6380 0.0284 0.078 Uiso 1 1 calc R . .
H5B H 0.3490 0.7147 0.1366 0.078 Uiso 1 1 calc R . .
H5C H 0.2800 0.6816 0.0706 0.078 Uiso 1 1 calc R . .
C6 C 0.27930(9) 0.4578(2) 0.25964(12) 0.0573(5) Uani 1 1 d . . .
H6A H 0.2359 0.5073 0.2448 0.086 Uiso 1 1 calc R . .
H6B H 0.3061 0.5164 0.3114 0.086 Uiso 1 1 calc R . .
H6C H 0.2731 0.3529 0.2834 0.086 Uiso 1 1 calc R . .
 
loop_
 _atom_site_aniso_label
 _atom_site_aniso_U_11
 _atom_site_aniso_U_22
 _atom_site_aniso_U_33
 _atom_site_aniso_U_23
 _atom_site_aniso_U_13
 _atom_site_aniso_U_12
P1 0.02160(16) 0.0315(2) 0.02868(18) -0.00107(14) 0.00505(13) -0.00112(13)
N1 0.0212(5) 0.0341(7) 0.0326(6) -0.0062(5) 0.0033(4) -0.0016(4)
Si1 0.02415(19) 0.0331(2) 0.0315(2) -0.00429(15) 0.00199(14) -0.00287(15)
O1 0.0218(4) 0.0423(6) 0.0332(5) 0.0046(4) 0.0079(4) 0.0049(4)
C1A 0.0198(12) 0.046(3) 0.0318(9) 0.001(2) 0.0045(9) 0.0030(19)
C2A 0.0314(14) 0.071(4) 0.0490(11) 0.004(2) 0.0099(10) -0.007(2)
C3A 0.034(3) 0.049(3) 0.0416(16) -0.0031(18) 0.0037(17) 0.011(2)
F1A 0.054(4) 0.081(3) 0.040(2) -0.0155(18) 0.0024(15) 0.015(2)
F2A 0.062(3) 0.107(4) 0.075(2) -0.022(3) -0.003(2) 0.053(3)
F3A 0.096(4) 0.0407(18) 0.071(3) -0.0111(16) 0.023(2) -0.0116(19)
F4A 0.069(3) 0.092(4) 0.072(3) 0.036(2) 0.023(2) -0.007(2)
F5A 0.0230(10) 0.149(6) 0.091(2) 0.030(3) 0.0146(12) -0.006(2)
F6A 0.115(5) 0.093(4) 0.100(3) -0.034(3) 0.045(3) -0.062(3)
C1B 0.0198(12) 0.046(3) 0.0318(9) 0.001(2) 0.0045(9) 0.0030(19)
C2B 0.0314(14) 0.071(4) 0.0490(11) 0.004(2) 0.0099(10) -0.007(2)
C3B 0.034(3) 0.049(3) 0.0416(16) -0.0031(18) 0.0037(17) 0.011(2)
F1B 0.053(6) 0.063(5) 0.035(4) -0.001(4) 0.005(3) 0.016(4)
F2B 0.047(4) 0.101(7) 0.066(4) -0.004(5) 0.016(3) 0.046(4)
F3B 0.101(7) 0.037(4) 0.074(5) -0.009(3) 0.015(5) -0.001(4)
F4B 0.044(4) 0.061(4) 0.036(3) 0.008(3) 0.012(3) -0.001(3)
F5B 0.024(2) 0.099(6) 0.113(6) 0.017(4) 0.001(3) -0.008(3)
F6B 0.065(4) 0.051(3) 0.067(3) -0.001(2) 0.017(2) -0.012(2)
C4 0.0363(8) 0.0485(10) 0.0478(9) -0.0073(7) -0.0086(7) 0.0031(7)
C5 0.0513(10) 0.0395(10) 0.0608(11) 0.0027(8) -0.0122(8) -0.0061(7)
C6 0.0496(10) 0.0808(14) 0.0429(9) -0.0197(9) 0.0110(8) -0.0132(9)

#==============================================================================

# MOLECULAR GEOMETRY
 
_geom_special_details
;
 All s.u.'s (except the s.u. in the dihedral angle between two l.s. planes)
 are estimated using the full covariance matrix.  The cell s.u.'s are taken
 into account individually in the estimation of s.u.'s in distances, angles
 and torsion angles; correlations between s.u.'s in cell parameters are only
 used when they are defined by crystal symmetry.  An approximate (isotropic)
 treatment of cell s.u.'s is used for estimating s.u.'s involving l.s. planes.
;
 
loop_
 _geom_bond_atom_site_label_1
 _geom_bond_atom_site_label_2
 _geom_bond_distance
 _geom_bond_site_symmetry_2
 _geom_bond_publ_flag
P1 O1 1.6843(10) . ?
P1 N1 1.7016(12) . ?
P1 N1 1.7052(11) 7 ?
P1 P1 2.5258(7) 7 ?
N1 P1 1.7052(11) 7 ?
N1 Si1 1.7629(11) . ?
Si1 C5 1.8418(17) . ?
Si1 C6 1.8481(16) . ?
Si1 C4 1.8588(15) . ?
O1 C1B 1.39(2) . ?
O1 C1A 1.409(12) . ?
C1A C2A 1.519(6) . ?
C1A C3A 1.519(6) . ?
C1A H1A 1.0000 . ?
C2A F4A 1.306(7) . ?
C2A F6A 1.314(7) . ?
C2A F5A 1.334(6) . ?
C3A F3A 1.319(6) . ?
C3A F1A 1.320(7) . ?
C3A F2A 1.335(6) . ?
C1B C3B 1.487(12) . ?
C1B C2B 1.512(12) . ?
C1B H1B 1.0000 . ?
C2B F6B 1.299(12) . ?
C2B F5B 1.317(12) . ?
C2B F4B 1.322(12) . ?
C3B F2B 1.324(12) . ?
C3B F1B 1.329(12) . ?
C3B F3B 1.336(12) . ?
C4 H4A 0.9800 . ?
C4 H4B 0.9800 . ?
C4 H4C 0.9800 . ?
C5 H5A 0.9800 . ?
C5 H5B 0.9800 . ?
C5 H5C 0.9800 . ?
C6 H6A 0.9800 . ?
C6 H6B 0.9800 . ?
C6 H6C 0.9800 . ?
 
loop_
 _geom_angle_atom_site_label_1
 _geom_angle_atom_site_label_2
 _geom_angle_atom_site_label_3
 _geom_angle
 _geom_angle_site_symmetry_1
 _geom_angle_site_symmetry_3
 _geom_angle_publ_flag
O1 P1 N1 103.68(5) . . ?
O1 P1 N1 97.60(5) . 7 ?
N1 P1 N1 84.30(6) . 7 ?
O1 P1 P1 104.40(4) . 7 ?
N1 P1 P1 42.20(4) . 7 ?
N1 P1 P1 42.09(4) 7 7 ?
P1 N1 P1 95.70(6) . 7 ?
P1 N1 Si1 131.63(7) . . ?
P1 N1 Si1 132.45(7) 7 . ?
N1 Si1 C5 106.73(7) . . ?
N1 Si1 C6 110.57(7) . . ?
C5 Si1 C6 111.02(9) . . ?
N1 Si1 C4 106.49(6) . . ?
C5 Si1 C4 113.00(8) . . ?
C6 Si1 C4 108.91(8) . . ?
C1B O1 C1A 10.4(7) . . ?
C1B O1 P1 119.6(9) . . ?
C1A O1 P1 116.8(4) . . ?
O1 C1A C2A 107.1(6) . . ?
O1 C1A C3A 110.3(7) . . ?
C2A C1A C3A 112.5(6) . . ?
O1 C1A H1A 109.0 . . ?
C2A C1A H1A 109.0 . . ?
C3A C1A H1A 109.0 . . ?
F4A C2A F6A 107.4(6) . . ?
F4A C2A F5A 106.0(7) . . ?
F6A C2A F5A 106.9(5) . . ?
F4A C2A C1A 113.1(7) . . ?
F6A C2A C1A 111.6(6) . . ?
F5A C2A C1A 111.4(6) . . ?
F3A C3A F1A 107.0(7) . . ?
F3A C3A F2A 106.5(6) . . ?
F1A C3A F2A 109.3(8) . . ?
F3A C3A C1A 110.4(6) . . ?
F1A C3A C1A 112.4(8) . . ?
F2A C3A C1A 111.0(6) . . ?
O1 C1B C3B 108.2(13) . . ?
O1 C1B C2B 108.6(14) . . ?
C3B C1B C2B 112.2(11) . . ?
O1 C1B H1B 109.3 . . ?
C3B C1B H1B 109.3 . . ?
C2B C1B H1B 109.3 . . ?
F6B C2B F5B 106.4(10) . . ?
F6B C2B F4B 108.4(11) . . ?
F5B C2B F4B 110.4(12) . . ?
F6B C2B C1B 110.2(11) . . ?
F5B C2B C1B 108.7(13) . . ?
F4B C2B C1B 112.5(13) . . ?
F2B C3B F1B 104.5(15) . . ?
F2B C3B F3B 107.0(12) . . ?
F1B C3B F3B 106.2(13) . . ?
F2B C3B C1B 113.4(12) . . ?
F1B C3B C1B 116.5(15) . . ?
F3B C3B C1B 108.7(12) . . ?
Si1 C4 H4A 109.5 . . ?
Si1 C4 H4B 109.5 . . ?
H4A C4 H4B 109.5 . . ?
Si1 C4 H4C 109.5 . . ?
H4A C4 H4C 109.5 . . ?
H4B C4 H4C 109.5 . . ?
Si1 C5 H5A 109.5 . . ?
Si1 C5 H5B 109.5 . . ?
H5A C5 H5B 109.5 . . ?
Si1 C5 H5C 109.5 . . ?
H5A C5 H5C 109.5 . . ?
H5B C5 H5C 109.5 . . ?
Si1 C6 H6A 109.5 . . ?
Si1 C6 H6B 109.5 . . ?
H6A C6 H6B 109.5 . . ?
Si1 C6 H6C 109.5 . . ?
H6A C6 H6C 109.5 . . ?
H6B C6 H6C 109.5 . . ?
 
loop_
 _geom_torsion_atom_site_label_1
 _geom_torsion_atom_site_label_2
 _geom_torsion_atom_site_label_3
 _geom_torsion_atom_site_label_4
 _geom_torsion
 _geom_torsion_site_symmetry_1
 _geom_torsion_site_symmetry_2
 _geom_torsion_site_symmetry_3
 _geom_torsion_site_symmetry_4
 _geom_torsion_publ_flag
O1 P1 N1 P1 96.46(6) . . . 7 ?
N1 P1 N1 P1 0.0 7 . . 7 ?
O1 P1 N1 Si1 -88.48(9) . . . . ?
N1 P1 N1 Si1 175.06(13) 7 . . . ?
P1 P1 N1 Si1 175.06(13) 7 . . . ?
P1 N1 Si1 C5 132.09(10) . . . . ?
P1 N1 Si1 C5 -54.57(12) 7 . . . ?
P1 N1 Si1 C6 -107.05(11) . . . . ?
P1 N1 Si1 C6 66.29(12) 7 . . . ?
P1 N1 Si1 C4 11.13(12) . . . . ?
P1 N1 Si1 C4 -175.53(10) 7 . . . ?
N1 P1 O1 C1B 109.3(6) . . . . ?
N1 P1 O1 C1B -164.7(6) 7 . . . ?
P1 P1 O1 C1B 152.9(6) 7 . . . ?
N1 P1 O1 C1A 120.7(4) . . . . ?
N1 P1 O1 C1A -153.3(4) 7 . . . ?
P1 P1 O1 C1A 164.3(4) 7 . . . ?
C1B O1 C1A C2A -27(7) . . . . ?
P1 O1 C1A C2A -135.2(5) . . . . ?
C1B O1 C1A C3A -150(8) . . . . ?
P1 O1 C1A C3A 102.1(6) . . . . ?
O1 C1A C2A F4A -61.3(8) . . . . ?
C3A C1A C2A F4A 60.0(11) . . . . ?
O1 C1A C2A F6A 59.9(9) . . . . ?
C3A C1A C2A F6A -178.8(8) . . . . ?
O1 C1A C2A F5A 179.3(6) . . . . ?
C3A C1A C2A F5A -59.3(10) . . . . ?
O1 C1A C3A F3A -59.2(9) . . . . ?
C2A C1A C3A F3A -178.7(8) . . . . ?
O1 C1A C3A F1A 60.2(10) . . . . ?
C2A C1A C3A F1A -59.3(12) . . . . ?
O1 C1A C3A F2A -177.0(7) . . . . ?
C2A C1A C3A F2A 63.5(10) . . . . ?
C1A O1 C1B C3B 29(6) . . . . ?
P1 O1 C1B C3B 106.0(12) . . . . ?
C1A O1 C1B C2B 151(8) . . . . ?
P1 O1 C1B C2B -132.0(10) . . . . ?
O1 C1B C2B F6B 51.8(16) . . . . ?
C3B C1B C2B F6B 171.3(14) . . . . ?
O1 C1B C2B F5B 168.0(13) . . . . ?
C3B C1B C2B F5B -72.5(18) . . . . ?
O1 C1B C2B F4B -69.4(14) . . . . ?
C3B C1B C2B F4B 50(2) . . . . ?
O1 C1B C3B F2B 179.9(14) . . . . ?
C2B C1B C3B F2B 60(2) . . . . ?
O1 C1B C3B F1B 58.5(19) . . . . ?
C2B C1B C3B F1B -61(2) . . . . ?
O1 C1B C3B F3B -61.3(17) . . . . ?
C2B C1B C3B F3B 178.8(15) . . . . ?
 
_diffrn_measured_fraction_theta_max    0.999
_diffrn_reflns_theta_full              32.00
_diffrn_measured_fraction_theta_full   0.999
_refine_diff_density_max    0.364
_refine_diff_density_min   -0.301
_refine_diff_density_rms    0.057

#=============================================================================
 
data_av_aw142_(AdNPCl)2

_audit_author_name                'Villinger, A.' 
_audit_creation_method            SHELXL-97 

#==============================================================================

# CHEMICAL DATA

_chemical_name_systematic
;
 ?
;
_chemical_name_common             ?
_chemical_melting_point           ?
_chemical_formula_moiety          'C20 H30 Cl2 N2 P2'
_chemical_formula_sum
 'C20 H30 Cl2 N2 P2'
_chemical_formula_weight          431.30
 
loop_
 _atom_type_symbol
 _atom_type_description
 _atom_type_scat_dispersion_real
 _atom_type_scat_dispersion_imag
 _atom_type_scat_source
 'C'  'C'   0.0033   0.0016
 'International Tables Vol C Tables 4.2.6.8 and 6.1.1.4'
 'H'  'H'   0.0000   0.0000
 'International Tables Vol C Tables 4.2.6.8 and 6.1.1.4'
 'N'  'N'   0.0061   0.0033
 'International Tables Vol C Tables 4.2.6.8 and 6.1.1.4'
 'P'  'P'   0.1023   0.0942
 'International Tables Vol C Tables 4.2.6.8 and 6.1.1.4'
 'Cl'  'Cl'   0.1484   0.1585
 'International Tables Vol C Tables 4.2.6.8 and 6.1.1.4'
 
#==============================================================================

# CRYSTAL DATA
 
_symmetry_cell_setting            monoclinic
_symmetry_space_group_name_H-M    'P 21/c'
_symmetry_space_group_name_Hall   '-P 2ybc'
_symmetry_Int_Tables_number       14
 
loop_
 _symmetry_equiv_pos_as_xyz
 'x, y, z'
 '-x, y+1/2, -z+1/2'
 '-x, -y, -z'
 'x, -y-1/2, z-1/2'
 
_cell_length_a                    14.3300(6)
_cell_length_b                    11.8618(5)
_cell_length_c                    12.7797(5)
_cell_angle_alpha                 90.00
_cell_angle_beta                  110.676(2)
_cell_angle_gamma                 90.00
_cell_volume                      2032.38(14)
_cell_formula_units_Z             4
_cell_measurement_temperature     173(2)
_cell_measurement_reflns_used     5084
_cell_measurement_theta_min       4.837 
_cell_measurement_theta_max       61.622
 
_exptl_crystal_description        block
_exptl_crystal_colour             colourless
_exptl_crystal_size_max           0.18
_exptl_crystal_size_mid           0.16
_exptl_crystal_size_min           0.11
_exptl_crystal_density_meas       ?
_exptl_crystal_density_diffrn     1.410
_exptl_crystal_density_method     'not measured'
_exptl_crystal_F_000              912
_exptl_absorpt_coefficient_mu     0.485
_exptl_absorpt_correction_type    multi-scan
_exptl_absorpt_correction_T_min   0.9178
_exptl_absorpt_correction_T_max   0.9486
_exptl_absorpt_process_details    '(SADABS; Sheldrick, 2004)'

#==============================================================================

# EXPERIMENTAL DATA
 
_exptl_special_details
;
 ?
;
 
_diffrn_ambient_temperature       173(2)
_diffrn_radiation_wavelength      0.71073
_diffrn_radiation_type            MoK\a
_diffrn_radiation_source          'sealed tube'
_diffrn_radiation_monochromator   graphite
_diffrn_measurement_device_type   'Bruker Apex Kappa II-CCD-diffractometer'
_diffrn_measurement_method        'phi and omega scans'
_diffrn_detector_area_resol_mean  ?
_diffrn_standards_number          ?
_diffrn_standards_interval_count  ?
_diffrn_standards_interval_time   ?
_diffrn_standards_decay_%         ?
_diffrn_reflns_number             20917
_diffrn_reflns_av_R_equivalents   0.0583
_diffrn_reflns_av_sigmaI/netI     0.0556
_diffrn_reflns_limit_h_min        -20
_diffrn_reflns_limit_h_max        18
_diffrn_reflns_limit_k_min        -16
_diffrn_reflns_limit_k_max        16
_diffrn_reflns_limit_l_min        -17
_diffrn_reflns_limit_l_max        17
_diffrn_reflns_theta_min          2.29
_diffrn_reflns_theta_max          30.00
_reflns_number_total              5874
_reflns_number_gt                 4388
_reflns_threshold_expression      >2\s(I)
 
_computing_data_collection        'Bruker Apex V7.51A'
_computing_cell_refinement        'Bruker Apex V7.51A'
_computing_data_reduction         'Bruker SAINT'
_computing_structure_solution     'SHELXS-97 (Sheldrick, 1997)'
_computing_structure_refinement   'SHELXL-97 (Sheldrick, 1997)'
_computing_molecular_graphics     'ORTEP-3v2.01 (Farrugia, 1997)' 
_computing_publication_material   'SHELXL-97'

#==============================================================================

# REFINEMENT DATA 

_refine_special_details
;
 All H atoms 
 were positioned geometrically and refined using a riding model, with C---H = 
 0.98 (methyl groups), 0.99\%A (methylene groups), 1.00\%A (methine groups) or 
 0.95 \%A (aryl CH) and with <i>U</i>~iso~(H) = 1.5 times <i>U</i>~eq~(C) 
 (methyl groups) or with <i>U</i>~iso~(H) = 1.2 times <i>U</i>~eq~(C) 
 (methylene  groups, aryl CH, methine groups). Torsion angles of all methyl 
 groups were allowed to refine.
 
 Refinement of F^2^ against ALL reflections.  The weighted R-factor wR and
 goodness of fit S are based on F^2^, conventional R-factors R are based
 on F, with F set to zero for negative F^2^. The threshold expression of
 F^2^ > 2\s(F^2^) is used only for calculating R-factors(gt) etc. and is
 not relevant to the choice of reflections for refinement.  R-factors based
 on F^2^ are statistically about twice as large as those based on F, and R-
 factors based on ALL data will be even larger.
;
 
_refine_ls_structure_factor_coef  Fsqd
_refine_ls_matrix_type            full
_refine_ls_weighting_scheme       calc
_refine_ls_weighting_details
 'calc w=1/[\s^2^(Fo^2^)+(0.0470P)^2^+0.7053P] where P=(Fo^2^+2Fc^2^)/3'
_atom_sites_solution_primary      direct
_atom_sites_solution_secondary    difmap
_atom_sites_solution_hydrogens    geom
_refine_ls_hydrogen_treatment     constr
_refine_ls_extinction_method      none
_refine_ls_extinction_coef        ?
_refine_ls_number_reflns          5874
_refine_ls_number_parameters      235
_refine_ls_number_restraints      0
_refine_ls_R_factor_all           0.0637
_refine_ls_R_factor_gt            0.0422
_refine_ls_wR_factor_ref          0.1149
_refine_ls_wR_factor_gt           0.1020
_refine_ls_goodness_of_fit_ref    1.035
_refine_ls_restrained_S_all       1.035
_refine_ls_shift/su_max           0.000
_refine_ls_shift/su_mean          0.000

#==============================================================================

# ATOMIC COORDINATES AND DISPLACEMENT PARAMETERS
 
loop_
 _atom_site_label
 _atom_site_type_symbol
 _atom_site_fract_x
 _atom_site_fract_y
 _atom_site_fract_z
 _atom_site_U_iso_or_equiv
 _atom_site_adp_type
 _atom_site_occupancy
 _atom_site_symmetry_multiplicity
 _atom_site_calc_flag
 _atom_site_refinement_flags
 _atom_site_disorder_assembly
 _atom_site_disorder_group
P1 P 0.18624(3) 0.20126(4) 0.19104(4) 0.01957(11) Uani 1 1 d . . .
P2 P 0.23421(3) 0.20648(4) 0.40400(4) 0.02232(12) Uani 1 1 d . . .
Cl1 Cl 0.18821(4) 0.03443(5) 0.13092(5) 0.03817(14) Uani 1 1 d . . .
Cl2 Cl 0.26807(4) 0.04327(5) 0.47617(5) 0.04184(16) Uani 1 1 d . . .
N1 N 0.13133(10) 0.18782(13) 0.28816(12) 0.0199(3) Uani 1 1 d . . .
N2 N 0.29057(10) 0.20705(13) 0.30748(11) 0.0198(3) Uani 1 1 d . . .
C1 C 0.02636(11) 0.16998(14) 0.27602(13) 0.0175(3) Uani 1 1 d . . .
C2 C -0.00002(13) 0.24512(16) 0.35877(15) 0.0226(4) Uani 1 1 d . . .
H2A H 0.0119 0.3251 0.3452 0.027 Uiso 1 1 calc R . .
H2B H 0.0429 0.2257 0.4362 0.027 Uiso 1 1 calc R . .
C3 C -0.11019(13) 0.22804(17) 0.34430(15) 0.0257(4) Uani 1 1 d . . .
H3 H -0.1273 0.2773 0.3985 0.031 Uiso 1 1 calc R . .
C4 C -0.17612(13) 0.25909(18) 0.22525(16) 0.0291(4) Uani 1 1 d . . .
H4A H -0.1655 0.3391 0.2104 0.035 Uiso 1 1 calc R . .
H4B H -0.2472 0.2491 0.2160 0.035 Uiso 1 1 calc R . .
C5 C -0.15017(13) 0.18350(18) 0.14263(15) 0.0285(4) Uani 1 1 d . . .
H5 H -0.1935 0.2036 0.0646 0.034 Uiso 1 1 calc R . .
C6 C -0.04040(12) 0.20161(18) 0.15661(15) 0.0252(4) Uani 1 1 d . . .
H6A H -0.0232 0.1543 0.1022 0.030 Uiso 1 1 calc R . .
H6B H -0.0294 0.2815 0.1419 0.030 Uiso 1 1 calc R . .
C7 C 0.00854(13) 0.04693(15) 0.29793(17) 0.0264(4) Uani 1 1 d . . .
H7A H 0.0518 0.0259 0.3747 0.032 Uiso 1 1 calc R . .
H7B H 0.0258 -0.0020 0.2447 0.032 Uiso 1 1 calc R . .
C8 C -0.10134(14) 0.02940(17) 0.28419(18) 0.0323(5) Uani 1 1 d . . .
H8 H -0.1126 -0.0513 0.2989 0.039 Uiso 1 1 calc R . .
C9 C -0.16736(14) 0.06054(19) 0.16516(18) 0.0351(5) Uani 1 1 d . . .
H9A H -0.1513 0.0115 0.1111 0.042 Uiso 1 1 calc R . .
H9B H -0.2383 0.0489 0.1555 0.042 Uiso 1 1 calc R . .
C10 C -0.12696(14) 0.10479(18) 0.36725(16) 0.0321(5) Uani 1 1 d . . .
H10A H -0.1975 0.0932 0.3597 0.039 Uiso 1 1 calc R . .
H10B H -0.0844 0.0848 0.4446 0.039 Uiso 1 1 calc R . .
C11 C 0.39079(11) 0.24948(14) 0.32125(13) 0.0164(3) Uani 1 1 d . . .
C12 C 0.46514(12) 0.20140(16) 0.43053(14) 0.0206(3) Uani 1 1 d . . .
H12A H 0.4635 0.1180 0.4276 0.025 Uiso 1 1 calc R . .
H12B H 0.4461 0.2256 0.4944 0.025 Uiso 1 1 calc R . .
C13 C 0.57097(12) 0.24334(17) 0.44722(14) 0.0237(4) Uani 1 1 d . . .
H13 H 0.6191 0.2125 0.5188 0.028 Uiso 1 1 calc R . .
C14 C 0.59966(13) 0.20281(17) 0.34901(15) 0.0254(4) Uani 1 1 d . . .
H14A H 0.5983 0.1194 0.3460 0.030 Uiso 1 1 calc R . .
H14B H 0.6682 0.2281 0.3592 0.030 Uiso 1 1 calc R . .
C15 C 0.52611(12) 0.25081(16) 0.23980(14) 0.0214(3) Uani 1 1 d . . .
H15 H 0.5453 0.2244 0.1758 0.026 Uiso 1 1 calc R . .
C16 C 0.41997(12) 0.20916(15) 0.22321(14) 0.0202(3) Uani 1 1 d . . .
H16A H 0.3723 0.2391 0.1521 0.024 Uiso 1 1 calc R . .
H16B H 0.4178 0.1258 0.2194 0.024 Uiso 1 1 calc R . .
C17 C 0.39387(12) 0.37793(15) 0.32602(15) 0.0221(4) Uani 1 1 d . . .
H17A H 0.3745 0.4044 0.3889 0.026 Uiso 1 1 calc R . .
H17B H 0.3459 0.4092 0.2558 0.026 Uiso 1 1 calc R . .
C18 C 0.49960(13) 0.41930(16) 0.34196(16) 0.0248(4) Uani 1 1 d . . .
H18 H 0.5013 0.5035 0.3450 0.030 Uiso 1 1 calc R . .
C19 C 0.57320(13) 0.37181(17) 0.45104(15) 0.0278(4) Uani 1 1 d . . .
H19A H 0.6413 0.3989 0.4619 0.033 Uiso 1 1 calc R . .
H19B H 0.5552 0.3985 0.5148 0.033 Uiso 1 1 calc R . .
C20 C 0.52841(13) 0.37910(16) 0.24350(15) 0.0247(4) Uani 1 1 d . . .
H20A H 0.4810 0.4099 0.1726 0.030 Uiso 1 1 calc R . .
H20B H 0.5961 0.4064 0.2525 0.030 Uiso 1 1 calc R . .
 
loop_
 _atom_site_aniso_label
 _atom_site_aniso_U_11
 _atom_site_aniso_U_22
 _atom_site_aniso_U_33
 _atom_site_aniso_U_23
 _atom_site_aniso_U_13
 _atom_site_aniso_U_12
P1 0.0158(2) 0.0261(2) 0.0166(2) 0.00139(17) 0.00550(16) -0.00230(17)
P2 0.0163(2) 0.0336(3) 0.0168(2) -0.00038(18) 0.00561(16) -0.00451(18)
Cl1 0.0394(3) 0.0368(3) 0.0420(3) -0.0170(2) 0.0189(2) -0.0075(2)
Cl2 0.0285(2) 0.0509(3) 0.0394(3) 0.0260(2) 0.0036(2) -0.0037(2)
N1 0.0137(6) 0.0283(8) 0.0178(7) 0.0015(6) 0.0055(5) -0.0027(6)
N2 0.0139(6) 0.0285(8) 0.0173(7) 0.0011(6) 0.0059(5) -0.0035(6)
C1 0.0129(7) 0.0213(8) 0.0178(8) 0.0021(6) 0.0046(6) -0.0007(6)
C2 0.0215(8) 0.0244(9) 0.0222(8) -0.0015(7) 0.0082(7) -0.0006(7)
C3 0.0205(8) 0.0340(11) 0.0254(9) 0.0006(8) 0.0115(7) 0.0046(7)
C4 0.0184(8) 0.0360(11) 0.0338(10) 0.0102(9) 0.0102(7) 0.0057(8)
C5 0.0148(8) 0.0485(13) 0.0193(8) 0.0047(8) 0.0025(6) -0.0044(8)
C6 0.0181(8) 0.0390(11) 0.0183(8) 0.0039(8) 0.0060(6) -0.0033(7)
C7 0.0227(8) 0.0194(9) 0.0387(11) 0.0023(8) 0.0129(8) -0.0011(7)
C8 0.0231(9) 0.0241(10) 0.0499(12) 0.0063(9) 0.0132(9) -0.0063(8)
C9 0.0236(9) 0.0419(13) 0.0388(11) -0.0099(9) 0.0099(8) -0.0136(9)
C10 0.0218(9) 0.0461(13) 0.0310(10) 0.0137(9) 0.0126(8) 0.0007(8)
C11 0.0130(7) 0.0202(8) 0.0168(7) 0.0008(6) 0.0062(6) -0.0001(6)
C12 0.0186(8) 0.0268(9) 0.0160(8) 0.0026(7) 0.0057(6) -0.0007(7)
C13 0.0155(8) 0.0352(10) 0.0180(8) 0.0014(7) 0.0028(6) -0.0007(7)
C14 0.0181(8) 0.0321(10) 0.0267(9) 0.0001(8) 0.0088(7) 0.0045(7)
C15 0.0177(8) 0.0290(9) 0.0200(8) -0.0028(7) 0.0098(6) 0.0011(7)
C16 0.0178(7) 0.0245(9) 0.0183(8) -0.0021(7) 0.0063(6) -0.0002(7)
C17 0.0203(8) 0.0209(9) 0.0276(9) 0.0007(7) 0.0117(7) 0.0015(7)
C18 0.0267(9) 0.0188(9) 0.0326(10) -0.0050(7) 0.0150(8) -0.0058(7)
C19 0.0220(8) 0.0379(11) 0.0245(9) -0.0100(8) 0.0095(7) -0.0092(8)
C20 0.0233(8) 0.0283(10) 0.0254(9) 0.0047(8) 0.0120(7) -0.0025(7)

#==============================================================================

# MOLECULAR GEOMETRY
 
_geom_special_details
;
 All s.u.'s (except the s.u. in the dihedral angle between two l.s. planes)
 are estimated using the full covariance matrix.  The cell s.u.'s are taken
 into account individually in the estimation of s.u.'s in distances, angles
 and torsion angles; correlations between s.u.'s in cell parameters are only
 used when they are defined by crystal symmetry.  An approximate (isotropic)
 treatment of cell s.u.'s is used for estimating s.u.'s involving l.s. planes.
;
 
loop_
 _geom_bond_atom_site_label_1
 _geom_bond_atom_site_label_2
 _geom_bond_distance
 _geom_bond_site_symmetry_2
 _geom_bond_publ_flag
P1 N1 1.6955(15) . ?
P1 N2 1.6981(14) . ?
P1 Cl1 2.1266(7) . ?
P1 P2 2.5617(6) . ?
P2 N1 1.6950(14) . ?
P2 N2 1.6962(14) . ?
P2 Cl2 2.1255(7) . ?
N1 C1 1.472(2) . ?
N2 C11 1.473(2) . ?
C1 C7 1.525(2) . ?
C1 C2 1.529(2) . ?
C1 C6 1.534(2) . ?
C2 C3 1.537(2) . ?
C2 H2A 0.9900 . ?
C2 H2B 0.9900 . ?
C3 C4 1.526(3) . ?
C3 C10 1.527(3) . ?
C3 H3 1.0000 . ?
C4 C5 1.528(3) . ?
C4 H4A 0.9900 . ?
C4 H4B 0.9900 . ?
C5 C9 1.523(3) . ?
C5 C6 1.534(2) . ?
C5 H5 1.0000 . ?
C6 H6A 0.9900 . ?
C6 H6B 0.9900 . ?
C7 C8 1.536(2) . ?
C7 H7A 0.9900 . ?
C7 H7B 0.9900 . ?
C8 C9 1.526(3) . ?
C8 C10 1.529(3) . ?
C8 H8 1.0000 . ?
C9 H9A 0.9900 . ?
C9 H9B 0.9900 . ?
C10 H10A 0.9900 . ?
C10 H10B 0.9900 . ?
C11 C17 1.525(2) . ?
C11 C16 1.531(2) . ?
C11 C12 1.536(2) . ?
C12 C13 1.538(2) . ?
C12 H12A 0.9900 . ?
C12 H12B 0.9900 . ?
C13 C19 1.525(3) . ?
C13 C14 1.530(3) . ?
C13 H13 1.0000 . ?
C14 C15 1.531(2) . ?
C14 H14A 0.9900 . ?
C14 H14B 0.9900 . ?
C15 C20 1.522(3) . ?
C15 C16 1.541(2) . ?
C15 H15 1.0000 . ?
C16 H16A 0.9900 . ?
C16 H16B 0.9900 . ?
C17 C18 1.536(2) . ?
C17 H17A 0.9900 . ?
C17 H17B 0.9900 . ?
C18 C19 1.528(3) . ?
C18 C20 1.532(3) . ?
C18 H18 1.0000 . ?
C19 H19A 0.9900 . ?
C19 H19B 0.9900 . ?
C20 H20A 0.9900 . ?
C20 H20B 0.9900 . ?
 
loop_
 _geom_angle_atom_site_label_1
 _geom_angle_atom_site_label_2
 _geom_angle_atom_site_label_3
 _geom_angle
 _geom_angle_site_symmetry_1
 _geom_angle_site_symmetry_3
 _geom_angle_publ_flag
N1 P1 N2 81.65(7) . . ?
N1 P1 Cl1 104.23(6) . . ?
N2 P1 Cl1 103.55(6) . . ?
N1 P1 P2 40.92(5) . . ?
N2 P1 P2 40.97(5) . . ?
Cl1 P1 P2 111.93(3) . . ?
N1 P2 N2 81.72(7) . . ?
N1 P2 Cl2 104.77(6) . . ?
N2 P2 Cl2 102.99(6) . . ?
N1 P2 P1 40.93(5) . . ?
N2 P2 P1 41.03(5) . . ?
Cl2 P2 P1 111.93(3) . . ?
C1 N1 P2 130.71(11) . . ?
C1 N1 P1 131.11(11) . . ?
P2 N1 P1 98.15(7) . . ?
C11 N2 P2 127.53(11) . . ?
C11 N2 P1 129.66(11) . . ?
P2 N2 P1 98.00(7) . . ?
N1 C1 C7 110.45(13) . . ?
N1 C1 C2 109.65(13) . . ?
C7 C1 C2 109.43(14) . . ?
N1 C1 C6 108.95(13) . . ?
C7 C1 C6 109.31(15) . . ?
C2 C1 C6 109.01(14) . . ?
C1 C2 C3 109.53(14) . . ?
C1 C2 H2A 109.8 . . ?
C3 C2 H2A 109.8 . . ?
C1 C2 H2B 109.8 . . ?
C3 C2 H2B 109.8 . . ?
H2A C2 H2B 108.2 . . ?
C4 C3 C10 109.79(16) . . ?
C4 C3 C2 109.65(15) . . ?
C10 C3 C2 109.14(15) . . ?
C4 C3 H3 109.4 . . ?
C10 C3 H3 109.4 . . ?
C2 C3 H3 109.4 . . ?
C3 C4 C5 109.35(15) . . ?
C3 C4 H4A 109.8 . . ?
C5 C4 H4A 109.8 . . ?
C3 C4 H4B 109.8 . . ?
C5 C4 H4B 109.8 . . ?
H4A C4 H4B 108.3 . . ?
C9 C5 C4 109.64(16) . . ?
C9 C5 C6 109.85(16) . . ?
C4 C5 C6 109.09(16) . . ?
C9 C5 H5 109.4 . . ?
C4 C5 H5 109.4 . . ?
C6 C5 H5 109.4 . . ?
C1 C6 C5 109.59(14) . . ?
C1 C6 H6A 109.8 . . ?
C5 C6 H6A 109.8 . . ?
C1 C6 H6B 109.8 . . ?
C5 C6 H6B 109.8 . . ?
H6A C6 H6B 108.2 . . ?
C1 C7 C8 109.88(15) . . ?
C1 C7 H7A 109.7 . . ?
C8 C7 H7A 109.7 . . ?
C1 C7 H7B 109.7 . . ?
C8 C7 H7B 109.7 . . ?
H7A C7 H7B 108.2 . . ?
C9 C8 C10 109.53(17) . . ?
C9 C8 C7 109.33(17) . . ?
C10 C8 C7 109.23(16) . . ?
C9 C8 H8 109.6 . . ?
C10 C8 H8 109.6 . . ?
C7 C8 H8 109.6 . . ?
C5 C9 C8 109.59(16) . . ?
C5 C9 H9A 109.8 . . ?
C8 C9 H9A 109.8 . . ?
C5 C9 H9B 109.8 . . ?
C8 C9 H9B 109.8 . . ?
H9A C9 H9B 108.2 . . ?
C3 C10 C8 109.52(15) . . ?
C3 C10 H10A 109.8 . . ?
C8 C10 H10A 109.8 . . ?
C3 C10 H10B 109.8 . . ?
C8 C10 H10B 109.8 . . ?
H10A C10 H10B 108.2 . . ?
N2 C11 C17 111.07(13) . . ?
N2 C11 C16 109.40(13) . . ?
C17 C11 C16 109.42(14) . . ?
N2 C11 C12 108.41(13) . . ?
C17 C11 C12 109.49(14) . . ?
C16 C11 C12 109.02(13) . . ?
C11 C12 C13 109.85(14) . . ?
C11 C12 H12A 109.7 . . ?
C13 C12 H12A 109.7 . . ?
C11 C12 H12B 109.7 . . ?
C13 C12 H12B 109.7 . . ?
H12A C12 H12B 108.2 . . ?
C19 C13 C14 109.37(15) . . ?
C19 C13 C12 109.65(15) . . ?
C14 C13 C12 108.79(14) . . ?
C19 C13 H13 109.7 . . ?
C14 C13 H13 109.7 . . ?
C12 C13 H13 109.7 . . ?
C13 C14 C15 109.46(14) . . ?
C13 C14 H14A 109.8 . . ?
C15 C14 H14A 109.8 . . ?
C13 C14 H14B 109.8 . . ?
C15 C14 H14B 109.8 . . ?
H14A C14 H14B 108.2 . . ?
C20 C15 C14 110.07(15) . . ?
C20 C15 C16 109.53(14) . . ?
C14 C15 C16 109.54(14) . . ?
C20 C15 H15 109.2 . . ?
C14 C15 H15 109.2 . . ?
C16 C15 H15 109.2 . . ?
C11 C16 C15 109.19(13) . . ?
C11 C16 H16A 109.8 . . ?
C15 C16 H16A 109.8 . . ?
C11 C16 H16B 109.8 . . ?
C15 C16 H16B 109.8 . . ?
H16A C16 H16B 108.3 . . ?
C11 C17 C18 109.74(14) . . ?
C11 C17 H17A 109.7 . . ?
C18 C17 H17A 109.7 . . ?
C11 C17 H17B 109.7 . . ?
C18 C17 H17B 109.7 . . ?
H17A C17 H17B 108.2 . . ?
C19 C18 C20 109.58(15) . . ?
C19 C18 C17 109.51(15) . . ?
C20 C18 C17 109.32(15) . . ?
C19 C18 H18 109.5 . . ?
C20 C18 H18 109.5 . . ?
C17 C18 H18 109.5 . . ?
C13 C19 C18 109.84(14) . . ?
C13 C19 H19A 109.7 . . ?
C18 C19 H19A 109.7 . . ?
C13 C19 H19B 109.7 . . ?
C18 C19 H19B 109.7 . . ?
H19A C19 H19B 108.2 . . ?
C15 C20 C18 109.11(14) . . ?
C15 C20 H20A 109.9 . . ?
C18 C20 H20A 109.9 . . ?
C15 C20 H20B 109.9 . . ?
C18 C20 H20B 109.9 . . ?
H20A C20 H20B 108.3 . . ?
 
loop_
 _geom_torsion_atom_site_label_1
 _geom_torsion_atom_site_label_2
 _geom_torsion_atom_site_label_3
 _geom_torsion_atom_site_label_4
 _geom_torsion
 _geom_torsion_site_symmetry_1
 _geom_torsion_site_symmetry_2
 _geom_torsion_site_symmetry_3
 _geom_torsion_site_symmetry_4
 _geom_torsion_publ_flag
N2 P1 P2 N1 -172.07(12) . . . . ?
Cl1 P1 P2 N1 -86.56(8) . . . . ?
N1 P1 P2 N2 172.07(12) . . . . ?
Cl1 P1 P2 N2 85.50(8) . . . . ?
N1 P1 P2 Cl2 87.43(8) . . . . ?
N2 P1 P2 Cl2 -84.63(8) . . . . ?
Cl1 P1 P2 Cl2 0.87(4) . . . . ?
N2 P2 N1 C1 176.86(16) . . . . ?
Cl2 P2 N1 C1 75.52(16) . . . . ?
P1 P2 N1 C1 -177.9(2) . . . . ?
N2 P2 N1 P1 -5.25(8) . . . . ?
Cl2 P2 N1 P1 -106.59(6) . . . . ?
N2 P1 N1 C1 -176.88(17) . . . . ?
Cl1 P1 N1 C1 -74.92(16) . . . . ?
P2 P1 N1 C1 177.9(2) . . . . ?
N2 P1 N1 P2 5.25(8) . . . . ?
Cl1 P1 N1 P2 107.20(6) . . . . ?
N1 P2 N2 C11 162.28(15) . . . . ?
Cl2 P2 N2 C11 -94.37(14) . . . . ?
P1 P2 N2 C11 157.04(19) . . . . ?
N1 P2 N2 P1 5.24(8) . . . . ?
Cl2 P2 N2 P1 108.59(6) . . . . ?
N1 P1 N2 C11 -161.55(16) . . . . ?
Cl1 P1 N2 C11 95.73(15) . . . . ?
P2 P1 N2 C11 -156.3(2) . . . . ?
N1 P1 N2 P2 -5.24(8) . . . . ?
Cl1 P1 N2 P2 -107.96(6) . . . . ?
P2 N1 C1 C7 -80.86(19) . . . . ?
P1 N1 C1 C7 101.92(18) . . . . ?
P2 N1 C1 C2 39.8(2) . . . . ?
P1 N1 C1 C2 -137.40(14) . . . . ?
P2 N1 C1 C6 159.06(14) . . . . ?
P1 N1 C1 C6 -18.2(2) . . . . ?
N1 C1 C2 C3 178.89(14) . . . . ?
C7 C1 C2 C3 -59.81(18) . . . . ?
C6 C1 C2 C3 59.69(18) . . . . ?
C1 C2 C3 C4 -60.0(2) . . . . ?
C1 C2 C3 C10 60.32(19) . . . . ?
C10 C3 C4 C5 -59.68(19) . . . . ?
C2 C3 C4 C5 60.2(2) . . . . ?
C3 C4 C5 C9 59.8(2) . . . . ?
C3 C4 C5 C6 -60.5(2) . . . . ?
N1 C1 C6 C5 -179.98(15) . . . . ?
C7 C1 C6 C5 59.23(19) . . . . ?
C2 C1 C6 C5 -60.3(2) . . . . ?
C9 C5 C6 C1 -59.5(2) . . . . ?
C4 C5 C6 C1 60.7(2) . . . . ?
N1 C1 C7 C8 -179.61(15) . . . . ?
C2 C1 C7 C8 59.58(19) . . . . ?
C6 C1 C7 C8 -59.7(2) . . . . ?
C1 C7 C8 C9 60.1(2) . . . . ?
C1 C7 C8 C10 -59.7(2) . . . . ?
C4 C5 C9 C8 -60.0(2) . . . . ?
C6 C5 C9 C8 59.8(2) . . . . ?
C10 C8 C9 C5 59.8(2) . . . . ?
C7 C8 C9 C5 -59.8(2) . . . . ?
C4 C3 C10 C8 59.63(19) . . . . ?
C2 C3 C10 C8 -60.58(19) . . . . ?
C9 C8 C10 C3 -59.52(19) . . . . ?
C7 C8 C10 C3 60.2(2) . . . . ?
P2 N2 C11 C17 -71.92(18) . . . . ?
P1 N2 C11 C17 77.95(18) . . . . ?
P2 N2 C11 C16 167.19(12) . . . . ?
P1 N2 C11 C16 -42.9(2) . . . . ?
P2 N2 C11 C12 48.41(19) . . . . ?
P1 N2 C11 C12 -161.71(13) . . . . ?
N2 C11 C12 C13 179.58(14) . . . . ?
C17 C11 C12 C13 -59.11(18) . . . . ?
C16 C11 C12 C13 60.57(18) . . . . ?
C11 C12 C13 C19 59.00(18) . . . . ?
C11 C12 C13 C14 -60.57(19) . . . . ?
C19 C13 C14 C15 -59.37(19) . . . . ?
C12 C13 C14 C15 60.4(2) . . . . ?
C13 C14 C15 C20 59.86(19) . . . . ?
C13 C14 C15 C16 -60.6(2) . . . . ?
N2 C11 C16 C15 -178.34(14) . . . . ?
C17 C11 C16 C15 59.78(17) . . . . ?
C12 C11 C16 C15 -59.94(18) . . . . ?
C20 C15 C16 C11 -60.50(18) . . . . ?
C14 C15 C16 C11 60.31(18) . . . . ?
N2 C11 C17 C18 179.25(13) . . . . ?
C16 C11 C17 C18 -59.87(17) . . . . ?
C12 C11 C17 C18 59.56(18) . . . . ?
C11 C17 C18 C19 -59.99(18) . . . . ?
C11 C17 C18 C20 60.08(19) . . . . ?
C14 C13 C19 C18 59.80(18) . . . . ?
C12 C13 C19 C18 -59.42(18) . . . . ?
C20 C18 C19 C13 -60.06(18) . . . . ?
C17 C18 C19 C13 59.85(18) . . . . ?
C14 C15 C20 C18 -59.78(18) . . . . ?
C16 C15 C20 C18 60.71(18) . . . . ?
C19 C18 C20 C15 59.68(18) . . . . ?
C17 C18 C20 C15 -60.34(19) . . . . ?
 
_diffrn_measured_fraction_theta_max    0.992
_diffrn_reflns_theta_full              30.00
_diffrn_measured_fraction_theta_full   0.992
_refine_diff_density_max    0.419
_refine_diff_density_min   -0.308
_refine_diff_density_rms    0.067

#=============================================================================
 
data_is_aw133_(AdNPCl)2_2

_audit_author_name                'Villinger, A.' 
_audit_creation_method            SHELXL-97 

#==============================================================================

# CHEMICAL DATA

_chemical_name_systematic
;
1,3-dichloro-2,4-di(adamantylamino)-cyclo-1,3-diphospha-2,4-diazane
;
_chemical_name_common             ?
_chemical_melting_point           ?
_chemical_formula_moiety          'C20 H30 Cl2 N2 P2'
_chemical_formula_sum
 'C20 H30 Cl2 N2 P2'
_chemical_formula_weight          431.30
 
loop_
 _atom_type_symbol
 _atom_type_description
 _atom_type_scat_dispersion_real
 _atom_type_scat_dispersion_imag
 _atom_type_scat_source
 'C'  'C'   0.0033   0.0016
 'International Tables Vol C Tables 4.2.6.8 and 6.1.1.4'
 'H'  'H'   0.0000   0.0000
 'International Tables Vol C Tables 4.2.6.8 and 6.1.1.4'
 'N'  'N'   0.0061   0.0033
 'International Tables Vol C Tables 4.2.6.8 and 6.1.1.4'
 'P'  'P'   0.1023   0.0942
 'International Tables Vol C Tables 4.2.6.8 and 6.1.1.4'
 'Cl'  'Cl'   0.1484   0.1585
 'International Tables Vol C Tables 4.2.6.8 and 6.1.1.4'
 
#==============================================================================

# CRYSTAL DATA
 
_symmetry_cell_setting            monoclinic
_symmetry_space_group_name_H-M    'P 21/c'
_symmetry_space_group_name_Hall   '-P 2ybc'
_symmetry_Int_Tables_number       14
 
loop_
 _symmetry_equiv_pos_as_xyz
 'x, y, z'
 '-x, y+1/2, -z+1/2'
 '-x, -y, -z'
 'x, -y-1/2, z-1/2'
 
_cell_length_a                    14.3494(7)
_cell_length_b                    11.8705(6)
_cell_length_c                    12.7844(7)
_cell_angle_alpha                 90.00
_cell_angle_beta                  110.751(3)
_cell_angle_gamma                 90.00
_cell_volume                      2036.36(18)
_cell_formula_units_Z             4
_cell_measurement_temperature     173(2)
_cell_measurement_reflns_used     1924
_cell_measurement_theta_min       6.320
_cell_measurement_theta_max       54.332
 
_exptl_crystal_description        block
_exptl_crystal_colour             colourless
_exptl_crystal_size_max           0.16
_exptl_crystal_size_mid           0.10
_exptl_crystal_size_min           0.06
_exptl_crystal_density_meas       ?
_exptl_crystal_density_diffrn     1.407
_exptl_crystal_density_method     'not measured'
_exptl_crystal_F_000              912
_exptl_absorpt_coefficient_mu     0.484
_exptl_absorpt_correction_type    multi-scan
_exptl_absorpt_correction_T_min   0.9266
_exptl_absorpt_correction_T_max   0.9715
_exptl_absorpt_process_details    '(SADABS; Sheldrick, 2004)'

#==============================================================================

# EXPERIMENTAL DATA
 
_exptl_special_details
;
 ?
;
 
_diffrn_ambient_temperature       173(2)
_diffrn_radiation_wavelength      0.71073
_diffrn_radiation_type            MoK\a
_diffrn_radiation_source          'sealed tube'
_diffrn_radiation_monochromator   graphite
_diffrn_measurement_device_type   'Bruker-Nonius Apex X8-CCD-diffractometer'
_diffrn_measurement_method        'phi and omega scans'
_diffrn_detector_area_resol_mean  ?
_diffrn_standards_number          ?
_diffrn_standards_interval_count  ?
_diffrn_standards_interval_time   ?
_diffrn_standards_decay_%         ?
_diffrn_reflns_number             18530
_diffrn_reflns_av_R_equivalents   0.0697
_diffrn_reflns_av_sigmaI/netI     0.0871
_diffrn_reflns_limit_h_min        -15
_diffrn_reflns_limit_h_max        18
_diffrn_reflns_limit_k_min        -13
_diffrn_reflns_limit_k_max        15
_diffrn_reflns_limit_l_min        -16
_diffrn_reflns_limit_l_max        16
_diffrn_reflns_theta_min          3.04
_diffrn_reflns_theta_max          27.99
_reflns_number_total              4886
_reflns_number_gt                 2891
_reflns_threshold_expression      >2\s(I)
 
_computing_data_collection        'Bruker Apex V7.51A'
_computing_cell_refinement        'Bruker Apex V7.51A'
_computing_data_reduction         'Bruker SAINT'
_computing_structure_solution     'SHELXS-97 (Sheldrick, 1997)'
_computing_structure_refinement   'SHELXL-97 (Sheldrick, 1997)'
_computing_molecular_graphics     'ORTEP-3v2.01 (Farrugia, 1997)' 
_computing_publication_material   'SHELXL-97'

#==============================================================================

# REFINEMENT DATA 

_refine_special_details
;
 All H atoms were positioned geometrically and refined using a riding model, 
 with C---H = 0.98 (methyl groups), 0.99\%A (methylene groups), 
 1.00\%A (methine groups) or 0.95 \%A (aryl CH) and with <i>U</i>~iso~(H) = 
 1.5 times <i>U</i>~eq~(C) (methyl groups) or with <i>U</i>~iso~(H) = 1.2 times 
 <i>U</i>~eq~(C) (methylene  groups, aryl CH, methine groups). Torsion angles 
 of all methyl groups were allowed to refine.
 
 Refinement of F^2^ against ALL reflections.  The weighted R-factor wR and
 goodness of fit S are based on F^2^, conventional R-factors R are based
 on F, with F set to zero for negative F^2^. The threshold expression of
 F^2^ > 2\s(F^2^) is used only for calculating R-factors(gt) etc. and is
 not relevant to the choice of reflections for refinement.  R-factors based
 on F^2^ are statistically about twice as large as those based on F, and R-
 factors based on ALL data will be even larger.
;
 
_refine_ls_structure_factor_coef  Fsqd
_refine_ls_matrix_type            full
_refine_ls_weighting_scheme       calc
_refine_ls_weighting_details
 'calc w=1/[\s^2^(Fo^2^)+(0.0454P)^2^+0.0000P] where P=(Fo^2^+2Fc^2^)/3'
_atom_sites_solution_primary      direct
_atom_sites_solution_secondary    difmap
_atom_sites_solution_hydrogens    geom
_refine_ls_hydrogen_treatment     constr
_refine_ls_extinction_method      none
_refine_ls_extinction_coef        ?
_refine_ls_number_reflns          4886
_refine_ls_number_parameters      235
_refine_ls_number_restraints      0
_refine_ls_R_factor_all           0.1092
_refine_ls_R_factor_gt            0.0497
_refine_ls_wR_factor_ref          0.1093
_refine_ls_wR_factor_gt           0.0944
_refine_ls_goodness_of_fit_ref    0.938
_refine_ls_restrained_S_all       0.938
_refine_ls_shift/su_max           0.000
_refine_ls_shift/su_mean          0.000

#==============================================================================

# ATOMIC COORDINATES AND DISPLACEMENT PARAMETERS
 
loop_
 _atom_site_label
 _atom_site_type_symbol
 _atom_site_fract_x
 _atom_site_fract_y
 _atom_site_fract_z
 _atom_site_U_iso_or_equiv
 _atom_site_adp_type
 _atom_site_occupancy
 _atom_site_symmetry_multiplicity
 _atom_site_calc_flag
 _atom_site_refinement_flags
 _atom_site_disorder_assembly
 _atom_site_disorder_group
P1 P 0.18623(5) 0.29867(6) 0.19094(5) 0.02165(17) Uani 1 1 d . . .
P2 P 0.23427(5) 0.29318(6) 0.40395(5) 0.02398(18) Uani 1 1 d . . .
Cl1 Cl 0.18839(5) 0.46566(7) 0.13102(6) 0.0399(2) Uani 1 1 d . . .
Cl2 Cl 0.26816(5) 0.45639(7) 0.47654(6) 0.0433(2) Uani 1 1 d . . .
N1 N 0.29091(14) 0.29292(18) 0.30748(16) 0.0196(5) Uani 1 1 d . . .
N2 N 0.13144(14) 0.31188(18) 0.28816(16) 0.0205(5) Uani 1 1 d . . .
C1 C 0.39122(17) 0.2500(2) 0.3213(2) 0.0184(5) Uani 1 1 d . . .
C2 C 0.39442(19) 0.1221(2) 0.3259(2) 0.0238(6) Uani 1 1 d . . .
H2A H 0.3465 0.0909 0.2556 0.029 Uiso 1 1 calc R . .
H2B H 0.3749 0.0955 0.3886 0.029 Uiso 1 1 calc R . .
C3 C 0.49954(19) 0.0806(2) 0.3420(2) 0.0250(6) Uani 1 1 d . . .
H3 H 0.5011 -0.0036 0.3450 0.030 Uiso 1 1 calc R . .
C4 C 0.52864(19) 0.1207(2) 0.2441(2) 0.0272(6) Uani 1 1 d . . .
H4A H 0.4816 0.0895 0.1732 0.033 Uiso 1 1 calc R . .
H4B H 0.5964 0.0935 0.2537 0.033 Uiso 1 1 calc R . .
C5 C 0.52624(18) 0.2494(2) 0.2392(2) 0.0216(6) Uani 1 1 d . . .
H5 H 0.5452 0.2757 0.1751 0.026 Uiso 1 1 calc R . .
C6 C 0.59958(18) 0.2973(2) 0.3490(2) 0.0262(6) Uani 1 1 d . . .
H6A H 0.6681 0.2722 0.3593 0.031 Uiso 1 1 calc R . .
H6B H 0.5981 0.3806 0.3461 0.031 Uiso 1 1 calc R . .
C7 C 0.57118(18) 0.2568(2) 0.4468(2) 0.0252(6) Uani 1 1 d . . .
H7 H 0.6194 0.2877 0.5182 0.030 Uiso 1 1 calc R . .
C8 C 0.46497(17) 0.2988(2) 0.4304(2) 0.0215(6) Uani 1 1 d . . .
H8A H 0.4461 0.2747 0.4943 0.026 Uiso 1 1 calc R . .
H8B H 0.4631 0.3822 0.4271 0.026 Uiso 1 1 calc R . .
C9 C 0.41999(17) 0.2903(2) 0.22332(19) 0.0200(6) Uani 1 1 d . . .
H9A H 0.4174 0.3736 0.2194 0.024 Uiso 1 1 calc R . .
H9B H 0.3722 0.2602 0.1523 0.024 Uiso 1 1 calc R . .
C10 C 0.5731(2) 0.1282(2) 0.4514(2) 0.0297(7) Uani 1 1 d . . .
H10A H 0.5546 0.1022 0.5151 0.036 Uiso 1 1 calc R . .
H10B H 0.6411 0.1007 0.4629 0.036 Uiso 1 1 calc R . .
C11 C 0.02627(17) 0.3298(2) 0.2759(2) 0.0196(6) Uani 1 1 d . . .
C12 C 0.00898(18) 0.4528(2) 0.2983(2) 0.0278(6) Uani 1 1 d . . .
H12A H 0.0264 0.5019 0.2454 0.033 Uiso 1 1 calc R . .
H12B H 0.0522 0.4735 0.3753 0.033 Uiso 1 1 calc R . .
C13 C -0.10119(19) 0.4704(2) 0.2843(2) 0.0313(7) Uani 1 1 d . . .
H13 H -0.1124 0.5511 0.2990 0.038 Uiso 1 1 calc R . .
C14 C -0.1672(2) 0.4395(2) 0.1652(2) 0.0358(7) Uani 1 1 d . . .
H14A H -0.2381 0.4511 0.1554 0.043 Uiso 1 1 calc R . .
H14B H -0.1510 0.4884 0.1112 0.043 Uiso 1 1 calc R . .
C15 C -0.14986(18) 0.3168(3) 0.1431(2) 0.0309(7) Uani 1 1 d . . .
H15 H -0.1934 0.2967 0.0651 0.037 Uiso 1 1 calc R . .
C16 C -0.17559(19) 0.2413(3) 0.2254(2) 0.0308(7) Uani 1 1 d . . .
H16A H -0.2466 0.2509 0.2160 0.037 Uiso 1 1 calc R . .
H16B H -0.1647 0.1614 0.2107 0.037 Uiso 1 1 calc R . .
C17 C -0.11005(19) 0.2722(2) 0.3445(2) 0.0274(6) Uani 1 1 d . . .
H17 H -0.1272 0.2229 0.3985 0.033 Uiso 1 1 calc R . .
C18 C 0.00023(18) 0.2547(2) 0.3586(2) 0.0233(6) Uani 1 1 d . . .
H18A H 0.0434 0.2738 0.4361 0.028 Uiso 1 1 calc R . .
H18B H 0.0118 0.1747 0.3448 0.028 Uiso 1 1 calc R . .
C19 C -0.04046(17) 0.2986(2) 0.1564(2) 0.0262(6) Uani 1 1 d . . .
H19A H -0.0234 0.3461 0.1020 0.031 Uiso 1 1 calc R . .
H19B H -0.0296 0.2188 0.1413 0.031 Uiso 1 1 calc R . .
C20 C -0.1263(2) 0.3953(2) 0.3680(2) 0.0321(7) Uani 1 1 d . . .
H20A H -0.0831 0.4152 0.4452 0.038 Uiso 1 1 calc R . .
H20B H -0.1965 0.4071 0.3611 0.038 Uiso 1 1 calc R . .
 
loop_
 _atom_site_aniso_label
 _atom_site_aniso_U_11
 _atom_site_aniso_U_22
 _atom_site_aniso_U_33
 _atom_site_aniso_U_23
 _atom_site_aniso_U_13
 _atom_site_aniso_U_12
P1 0.0150(3) 0.0284(4) 0.0209(3) -0.0012(3) 0.0056(3) 0.0020(3)
P2 0.0155(3) 0.0356(4) 0.0206(4) 0.0005(3) 0.0061(3) 0.0047(3)
Cl1 0.0376(4) 0.0410(5) 0.0437(4) 0.0170(4) 0.0178(4) 0.0080(4)
Cl2 0.0289(4) 0.0529(5) 0.0422(4) -0.0236(4) 0.0051(3) 0.0037(4)
N1 0.0139(10) 0.0270(12) 0.0180(11) -0.0019(9) 0.0058(9) 0.0022(10)
N2 0.0142(10) 0.0296(13) 0.0179(10) -0.0018(10) 0.0060(8) 0.0020(10)
C1 0.0123(11) 0.0205(13) 0.0241(13) -0.0008(11) 0.0088(10) 0.0020(11)
C2 0.0223(13) 0.0237(14) 0.0281(14) -0.0004(12) 0.0122(12) -0.0038(12)
C3 0.0239(13) 0.0216(14) 0.0339(15) 0.0014(12) 0.0157(12) 0.0045(12)
C4 0.0201(13) 0.0335(16) 0.0290(15) -0.0025(13) 0.0099(12) 0.0042(13)
C5 0.0176(13) 0.0290(15) 0.0202(13) 0.0015(12) 0.0093(11) -0.0010(12)
C6 0.0150(12) 0.0351(16) 0.0277(14) 0.0002(13) 0.0066(11) -0.0023(13)
C7 0.0142(12) 0.0382(17) 0.0212(13) -0.0015(13) 0.0037(11) -0.0004(13)
C8 0.0182(12) 0.0267(14) 0.0195(13) 0.0005(12) 0.0067(10) -0.0010(13)
C9 0.0187(12) 0.0258(14) 0.0161(12) -0.0007(11) 0.0070(10) -0.0020(12)
C10 0.0240(14) 0.0393(18) 0.0279(15) 0.0102(14) 0.0116(12) 0.0099(14)
C11 0.0142(12) 0.0245(14) 0.0213(13) 0.0004(11) 0.0076(10) 0.0044(11)
C12 0.0201(13) 0.0247(15) 0.0382(16) -0.0033(13) 0.0100(12) 0.0017(13)
C13 0.0205(13) 0.0224(15) 0.0510(18) -0.0047(14) 0.0125(13) 0.0060(13)
C14 0.0212(14) 0.046(2) 0.0403(17) 0.0094(16) 0.0107(13) 0.0135(15)
C15 0.0151(12) 0.054(2) 0.0209(14) -0.0056(14) 0.0032(11) 0.0035(14)
C16 0.0165(13) 0.0375(17) 0.0387(17) -0.0088(14) 0.0102(12) -0.0035(13)
C17 0.0215(13) 0.0354(17) 0.0279(15) -0.0001(13) 0.0119(12) -0.0008(13)
C18 0.0202(13) 0.0275(14) 0.0237(14) 0.0021(12) 0.0093(11) 0.0007(13)
C19 0.0141(12) 0.0415(17) 0.0213(13) -0.0022(13) 0.0043(10) 0.0032(14)
C20 0.0200(14) 0.0468(19) 0.0315(16) -0.0134(14) 0.0118(12) -0.0018(14)

#==============================================================================

# MOLECULAR GEOMETRY
 
_geom_special_details
;
 All s.u.'s (except the s.u. in the dihedral angle between two l.s. planes)
 are estimated using the full covariance matrix.  The cell s.u.'s are taken
 into account individually in the estimation of s.u.'s in distances, angles
 and torsion angles; correlations between s.u.'s in cell parameters are only
 used when they are defined by crystal symmetry.  An approximate (isotropic)
 treatment of cell s.u.'s is used for estimating s.u.'s involving l.s. planes.
;
 
loop_
 _geom_bond_atom_site_label_1
 _geom_bond_atom_site_label_2
 _geom_bond_distance
 _geom_bond_site_symmetry_2
 _geom_bond_publ_flag
P1 N2 1.697(2) . ?
P1 N1 1.7014(19) . ?
P1 Cl1 2.1293(10) . ?
P1 P2 2.5622(9) . ?
P2 N2 1.694(2) . ?
P2 N1 1.701(2) . ?
P2 Cl2 2.1287(11) . ?
N1 C1 1.477(3) . ?
N2 C11 1.476(3) . ?
C1 C2 1.520(3) . ?
C1 C9 1.528(3) . ?
C1 C8 1.534(3) . ?
C2 C3 1.530(3) . ?
C2 H2A 0.9900 . ?
C2 H2B 0.9900 . ?
C3 C4 1.529(4) . ?
C3 C10 1.531(4) . ?
C3 H3 1.0000 . ?
C4 C5 1.529(4) . ?
C4 H4A 0.9900 . ?
C4 H4B 0.9900 . ?
C5 C6 1.534(3) . ?
C5 C9 1.543(3) . ?
C5 H5 1.0000 . ?
C6 C7 1.524(3) . ?
C6 H6A 0.9900 . ?
C6 H6B 0.9900 . ?
C7 C10 1.528(4) . ?
C7 C8 1.546(3) . ?
C7 H7 1.0000 . ?
C8 H8A 0.9900 . ?
C8 H8B 0.9900 . ?
C9 H9A 0.9900 . ?
C9 H9B 0.9900 . ?
C10 H10A 0.9900 . ?
C10 H10B 0.9900 . ?
C11 C12 1.525(3) . ?
C11 C18 1.528(3) . ?
C11 C19 1.534(3) . ?
C12 C13 1.541(3) . ?
C12 H12A 0.9900 . ?
C12 H12B 0.9900 . ?
C13 C14 1.526(4) . ?
C13 C20 1.530(4) . ?
C13 H13 1.0000 . ?
C14 C15 1.520(4) . ?
C14 H14A 0.9900 . ?
C14 H14B 0.9900 . ?
C15 C16 1.525(4) . ?
C15 C19 1.534(3) . ?
C15 H15 1.0000 . ?
C16 C17 1.524(3) . ?
C16 H16A 0.9900 . ?
C16 H16B 0.9900 . ?
C17 C20 1.526(4) . ?
C17 C18 1.542(3) . ?
C17 H17 1.0000 . ?
C18 H18A 0.9900 . ?
C18 H18B 0.9900 . ?
C19 H19A 0.9900 . ?
C19 H19B 0.9900 . ?
C20 H20A 0.9900 . ?
C20 H20B 0.9900 . ?
 
loop_
 _geom_angle_atom_site_label_1
 _geom_angle_atom_site_label_2
 _geom_angle_atom_site_label_3
 _geom_angle
 _geom_angle_site_symmetry_1
 _geom_angle_site_symmetry_3
 _geom_angle_publ_flag
N2 P1 N1 81.76(10) . . ?
N2 P1 Cl1 104.30(8) . . ?
N1 P1 Cl1 103.39(8) . . ?
N2 P1 P2 40.88(7) . . ?
N1 P1 P2 41.12(7) . . ?
Cl1 P1 P2 111.92(4) . . ?
N2 P2 N1 81.88(10) . . ?
N2 P2 Cl2 104.80(8) . . ?
N1 P2 Cl2 102.93(8) . . ?
N2 P2 P1 40.97(7) . . ?
N1 P2 P1 41.15(6) . . ?
Cl2 P2 P1 111.97(4) . . ?
C1 N1 P2 127.58(16) . . ?
C1 N1 P1 129.71(16) . . ?
P2 N1 P1 97.73(10) . . ?
C11 N2 P2 130.75(16) . . ?
C11 N2 P1 131.07(16) . . ?
P2 N2 P1 98.15(10) . . ?
N1 C1 C2 111.3(2) . . ?
N1 C1 C9 109.22(19) . . ?
C2 C1 C9 109.4(2) . . ?
N1 C1 C8 107.90(19) . . ?
C2 C1 C8 109.9(2) . . ?
C9 C1 C8 109.1(2) . . ?
C1 C2 C3 110.0(2) . . ?
C1 C2 H2A 109.7 . . ?
C3 C2 H2A 109.7 . . ?
C1 C2 H2B 109.7 . . ?
C3 C2 H2B 109.7 . . ?
H2A C2 H2B 108.2 . . ?
C4 C3 C2 109.4(2) . . ?
C4 C3 C10 109.5(2) . . ?
C2 C3 C10 109.3(2) . . ?
C4 C3 H3 109.5 . . ?
C2 C3 H3 109.5 . . ?
C10 C3 H3 109.5 . . ?
C3 C4 C5 109.6(2) . . ?
C3 C4 H4A 109.7 . . ?
C5 C4 H4A 109.7 . . ?
C3 C4 H4B 109.7 . . ?
C5 C4 H4B 109.7 . . ?
H4A C4 H4B 108.2 . . ?
C4 C5 C6 109.5(2) . . ?
C4 C5 C9 109.1(2) . . ?
C6 C5 C9 109.2(2) . . ?
C4 C5 H5 109.7 . . ?
C6 C5 H5 109.7 . . ?
C9 C5 H5 109.7 . . ?
C7 C6 C5 109.7(2) . . ?
C7 C6 H6A 109.7 . . ?
C5 C6 H6A 109.7 . . ?
C7 C6 H6B 109.7 . . ?
C5 C6 H6B 109.7 . . ?
H6A C6 H6B 108.2 . . ?
C6 C7 C10 109.9(2) . . ?
C6 C7 C8 108.9(2) . . ?
C10 C7 C8 109.3(2) . . ?
C6 C7 H7 109.5 . . ?
C10 C7 H7 109.5 . . ?
C8 C7 H7 109.5 . . ?
C1 C8 C7 109.3(2) . . ?
C1 C8 H8A 109.8 . . ?
C7 C8 H8A 109.8 . . ?
C1 C8 H8B 109.8 . . ?
C7 C8 H8B 109.8 . . ?
H8A C8 H8B 108.3 . . ?
C1 C9 C5 109.6(2) . . ?
C1 C9 H9A 109.8 . . ?
C5 C9 H9A 109.8 . . ?
C1 C9 H9B 109.8 . . ?
C5 C9 H9B 109.8 . . ?
H9A C9 H9B 108.2 . . ?
C7 C10 C3 109.6(2) . . ?
C7 C10 H10A 109.7 . . ?
C3 C10 H10A 109.7 . . ?
C7 C10 H10B 109.7 . . ?
C3 C10 H10B 109.7 . . ?
H10A C10 H10B 108.2 . . ?
N2 C11 C12 110.3(2) . . ?
N2 C11 C18 109.5(2) . . ?
C12 C11 C18 109.4(2) . . ?
N2 C11 C19 108.94(19) . . ?
C12 C11 C19 109.5(2) . . ?
C18 C11 C19 109.2(2) . . ?
C11 C12 C13 109.7(2) . . ?
C11 C12 H12A 109.7 . . ?
C13 C12 H12A 109.7 . . ?
C11 C12 H12B 109.7 . . ?
C13 C12 H12B 109.7 . . ?
H12A C12 H12B 108.2 . . ?
C14 C13 C20 109.9(2) . . ?
C14 C13 C12 109.3(2) . . ?
C20 C13 C12 109.0(2) . . ?
C14 C13 H13 109.5 . . ?
C20 C13 H13 109.5 . . ?
C12 C13 H13 109.5 . . ?
C15 C14 C13 109.4(2) . . ?
C15 C14 H14A 109.8 . . ?
C13 C14 H14A 109.8 . . ?
C15 C14 H14B 109.8 . . ?
C13 C14 H14B 109.8 . . ?
H14A C14 H14B 108.2 . . ?
C14 C15 C16 109.9(2) . . ?
C14 C15 C19 110.1(2) . . ?
C16 C15 C19 109.2(2) . . ?
C14 C15 H15 109.2 . . ?
C16 C15 H15 109.2 . . ?
C19 C15 H15 109.2 . . ?
C17 C16 C15 109.4(2) . . ?
C17 C16 H16A 109.8 . . ?
C15 C16 H16A 109.8 . . ?
C17 C16 H16B 109.8 . . ?
C15 C16 H16B 109.8 . . ?
H16A C16 H16B 108.2 . . ?
C16 C17 C20 110.2(2) . . ?
C16 C17 C18 109.2(2) . . ?
C20 C17 C18 109.2(2) . . ?
C16 C17 H17 109.4 . . ?
C20 C17 H17 109.4 . . ?
C18 C17 H17 109.4 . . ?
C11 C18 C17 109.4(2) . . ?
C11 C18 H18A 109.8 . . ?
C17 C18 H18A 109.8 . . ?
C11 C18 H18B 109.8 . . ?
C17 C18 H18B 109.8 . . ?
H18A C18 H18B 108.2 . . ?
C15 C19 C11 109.2(2) . . ?
C15 C19 H19A 109.8 . . ?
C11 C19 H19A 109.8 . . ?
C15 C19 H19B 109.8 . . ?
C11 C19 H19B 109.8 . . ?
H19A C19 H19B 108.3 . . ?
C17 C20 C13 109.3(2) . . ?
C17 C20 H20A 109.8 . . ?
C13 C20 H20A 109.8 . . ?
C17 C20 H20B 109.8 . . ?
C13 C20 H20B 109.8 . . ?
H20A C20 H20B 108.3 . . ?
 
loop_
 _geom_torsion_atom_site_label_1
 _geom_torsion_atom_site_label_2
 _geom_torsion_atom_site_label_3
 _geom_torsion_atom_site_label_4
 _geom_torsion
 _geom_torsion_site_symmetry_1
 _geom_torsion_site_symmetry_2
 _geom_torsion_site_symmetry_3
 _geom_torsion_site_symmetry_4
 _geom_torsion_publ_flag
N1 P1 P2 N2 172.00(16) . . . . ?
Cl1 P1 P2 N2 86.67(12) . . . . ?
N2 P1 P2 N1 -172.00(16) . . . . ?
Cl1 P1 P2 N1 -85.33(12) . . . . ?
N2 P1 P2 Cl2 -87.45(12) . . . . ?
N1 P1 P2 Cl2 84.55(12) . . . . ?
Cl1 P1 P2 Cl2 -0.78(5) . . . . ?
N2 P2 N1 C1 -161.9(2) . . . . ?
Cl2 P2 N1 C1 94.7(2) . . . . ?
P1 P2 N1 C1 -156.6(3) . . . . ?
N2 P2 N1 P1 -5.29(11) . . . . ?
Cl2 P2 N1 P1 -108.70(9) . . . . ?
N2 P1 N1 C1 161.2(2) . . . . ?
Cl1 P1 N1 C1 -96.0(2) . . . . ?
P2 P1 N1 C1 155.9(3) . . . . ?
N2 P1 N1 P2 5.28(11) . . . . ?
Cl1 P1 N1 P2 108.11(9) . . . . ?
N1 P2 N2 C11 -176.7(2) . . . . ?
Cl2 P2 N2 C11 -75.4(2) . . . . ?
P1 P2 N2 C11 178.0(3) . . . . ?
N1 P2 N2 P1 5.30(11) . . . . ?
Cl2 P2 N2 P1 106.61(9) . . . . ?
N1 P1 N2 C11 176.7(2) . . . . ?
Cl1 P1 N2 C11 74.9(2) . . . . ?
P2 P1 N2 C11 -178.0(3) . . . . ?
N1 P1 N2 P2 -5.30(11) . . . . ?
Cl1 P1 N2 P2 -107.10(9) . . . . ?
P2 N1 C1 C2 71.6(3) . . . . ?
P1 N1 C1 C2 -77.7(3) . . . . ?
P2 N1 C1 C9 -167.50(17) . . . . ?
P1 N1 C1 C9 43.2(3) . . . . ?
P2 N1 C1 C8 -49.0(3) . . . . ?
P1 N1 C1 C8 161.67(18) . . . . ?
N1 C1 C2 C3 -179.1(2) . . . . ?
C9 C1 C2 C3 60.1(3) . . . . ?
C8 C1 C2 C3 -59.6(3) . . . . ?
C1 C2 C3 C4 -60.0(3) . . . . ?
C1 C2 C3 C10 59.9(3) . . . . ?
C2 C3 C4 C5 59.9(3) . . . . ?
C10 C3 C4 C5 -59.9(3) . . . . ?
C3 C4 C5 C6 59.7(3) . . . . ?
C3 C4 C5 C9 -59.8(3) . . . . ?
C4 C5 C6 C7 -59.3(3) . . . . ?
C9 C5 C6 C7 60.1(3) . . . . ?
C5 C6 C7 C10 59.2(3) . . . . ?
C5 C6 C7 C8 -60.5(3) . . . . ?
N1 C1 C8 C7 -179.3(2) . . . . ?
C2 C1 C8 C7 59.1(3) . . . . ?
C9 C1 C8 C7 -60.8(3) . . . . ?
C6 C7 C8 C1 60.8(3) . . . . ?
C10 C7 C8 C1 -59.3(3) . . . . ?
N1 C1 C9 C5 178.00(19) . . . . ?
C2 C1 C9 C5 -59.9(3) . . . . ?
C8 C1 C9 C5 60.3(3) . . . . ?
C4 C5 C9 C1 59.9(3) . . . . ?
C6 C5 C9 C1 -59.8(3) . . . . ?
C6 C7 C10 C3 -59.4(3) . . . . ?
C8 C7 C10 C3 60.1(3) . . . . ?
C4 C3 C10 C7 59.6(3) . . . . ?
C2 C3 C10 C7 -60.2(3) . . . . ?
P2 N2 C11 C12 80.6(3) . . . . ?
P1 N2 C11 C12 -102.0(3) . . . . ?
P2 N2 C11 C18 -39.8(3) . . . . ?
P1 N2 C11 C18 137.5(2) . . . . ?
P2 N2 C11 C19 -159.22(19) . . . . ?
P1 N2 C11 C19 18.1(3) . . . . ?
N2 C11 C12 C13 179.5(2) . . . . ?
C18 C11 C12 C13 -59.9(3) . . . . ?
C19 C11 C12 C13 59.7(3) . . . . ?
C11 C12 C13 C14 -59.9(3) . . . . ?
C11 C12 C13 C20 60.3(3) . . . . ?
C20 C13 C14 C15 -59.7(3) . . . . ?
C12 C13 C14 C15 59.9(3) . . . . ?
C13 C14 C15 C16 60.0(3) . . . . ?
C13 C14 C15 C19 -60.3(3) . . . . ?
C14 C15 C16 C17 -59.8(3) . . . . ?
C19 C15 C16 C17 61.0(3) . . . . ?
C15 C16 C17 C20 59.4(3) . . . . ?
C15 C16 C17 C18 -60.5(3) . . . . ?
N2 C11 C18 C17 -179.2(2) . . . . ?
C12 C11 C18 C17 59.9(3) . . . . ?
C19 C11 C18 C17 -60.0(3) . . . . ?
C16 C17 C18 C11 60.1(3) . . . . ?
C20 C17 C18 C11 -60.4(3) . . . . ?
C14 C15 C19 C11 60.0(3) . . . . ?
C16 C15 C19 C11 -60.7(3) . . . . ?
N2 C11 C19 C15 179.9(2) . . . . ?
C12 C11 C19 C15 -59.4(3) . . . . ?
C18 C11 C19 C15 60.3(3) . . . . ?
C16 C17 C20 C13 -59.0(3) . . . . ?
C18 C17 C20 C13 60.9(3) . . . . ?
C14 C13 C20 C17 59.1(3) . . . . ?
C12 C13 C20 C17 -60.8(3) . . . . ?
 
_diffrn_measured_fraction_theta_max    0.995
_diffrn_reflns_theta_full              27.99
_diffrn_measured_fraction_theta_full   0.995
_refine_diff_density_max    0.356
_refine_diff_density_min   -0.376
_refine_diff_density_rms    0.076

#=============================================================================
 
data_is_aw143_(ternpcl)2

_audit_author_name                'Villinger, A.' 
_audit_creation_method            SHELXL-97 

#==============================================================================

# CHEMICAL DATA

_chemical_name_systematic
;
1,3-dichloro-2,4-bis(2,6-bis(2,4,6-trimethylphenyl)phenyl)-cyclo-1,3-
diphospha-2,4-diazane
;
_chemical_name_common             ?
_chemical_melting_point           ?
_chemical_formula_moiety          'C48 H50 Cl2 N2 P2'
_chemical_formula_sum
 'C48 H50 Cl2 N2 P2'
_chemical_formula_weight          787.74
 
loop_
 _atom_type_symbol
 _atom_type_description
 _atom_type_scat_dispersion_real
 _atom_type_scat_dispersion_imag
 _atom_type_scat_source
 'C'  'C'   0.0033   0.0016
 'International Tables Vol C Tables 4.2.6.8 and 6.1.1.4'
 'H'  'H'   0.0000   0.0000
 'International Tables Vol C Tables 4.2.6.8 and 6.1.1.4'
 'N'  'N'   0.0061   0.0033
 'International Tables Vol C Tables 4.2.6.8 and 6.1.1.4'
 'P'  'P'   0.1023   0.0942
 'International Tables Vol C Tables 4.2.6.8 and 6.1.1.4'
 'Cl'  'Cl'   0.1484   0.1585
 'International Tables Vol C Tables 4.2.6.8 and 6.1.1.4'
 
#==============================================================================

# CRYSTAL DATA
 
_symmetry_cell_setting            orthorhombic
_symmetry_space_group_name_H-M    'F d d 2'
_symmetry_space_group_name_Hall   'F 2 -2d'
_symmetry_Int_Tables_number       43
 
loop_
 _symmetry_equiv_pos_as_xyz
 'x, y, z'
 '-x, -y, z'
 'x+1/4, -y+1/4, z+1/4'
 '-x+1/4, y+1/4, z+1/4'
 'x, y+1/2, z+1/2'
 '-x, -y+1/2, z+1/2'
 'x+1/4, -y+3/4, z+3/4'
 '-x+1/4, y+3/4, z+3/4'
 'x+1/2, y, z+1/2'
 '-x+1/2, -y, z+1/2'
 'x+3/4, -y+1/4, z+3/4'
 '-x+3/4, y+1/4, z+3/4'
 'x+1/2, y+1/2, z'
 '-x+1/2, -y+1/2, z'
 'x+3/4, -y+3/4, z+1/4'
 '-x+3/4, y+3/4, z+1/4'
 
_cell_length_a                    21.9363(16)
_cell_length_b                    44.948(3)
_cell_length_c                    8.5007(5)
_cell_angle_alpha                 90.00
_cell_angle_beta                  90.00
_cell_angle_gamma                 90.00
_cell_volume                      8381.6(10)
_cell_formula_units_Z             8
_cell_measurement_temperature     173(2)
_cell_measurement_reflns_used     5185 
_cell_measurement_theta_min       5.815
_cell_measurement_theta_max       57.722
 
_exptl_crystal_description        block
_exptl_crystal_colour             colourless
_exptl_crystal_size_max           0.29
_exptl_crystal_size_mid           0.18
_exptl_crystal_size_min           0.14
_exptl_crystal_density_meas       ?
_exptl_crystal_density_diffrn     1.249
_exptl_crystal_density_method     'not measured'
_exptl_crystal_F_000              3328
_exptl_absorpt_coefficient_mu     0.267
_exptl_absorpt_correction_type    multi-scan
_exptl_absorpt_correction_T_min   0.9266
_exptl_absorpt_correction_T_max   0.9636
_exptl_absorpt_process_details    '(SADABS; Sheldrick, 2004)'

#==============================================================================

# EXPERIMENTAL DATA
 
_exptl_special_details
;
 ?
;
 
_diffrn_ambient_temperature       173(2)
_diffrn_radiation_wavelength      0.71073
_diffrn_radiation_type            MoK\a
_diffrn_radiation_source          'sealed tube'
_diffrn_radiation_monochromator   graphite
_diffrn_measurement_device_type   'Bruker Apex Kappa II-CCD-diffractometer'
_diffrn_measurement_method        'phi and omega scans'
_diffrn_detector_area_resol_mean  ?
_diffrn_standards_number          ?
_diffrn_standards_interval_count  ?
_diffrn_standards_interval_time   ?
_diffrn_standards_decay_%         ?
_diffrn_reflns_number             19101
_diffrn_reflns_av_R_equivalents   0.0560
_diffrn_reflns_av_sigmaI/netI     0.0523
_diffrn_reflns_limit_h_min        -29
_diffrn_reflns_limit_h_max        29
_diffrn_reflns_limit_k_min        -61
_diffrn_reflns_limit_k_max        59
_diffrn_reflns_limit_l_min        -11
_diffrn_reflns_limit_l_max        11
_diffrn_reflns_theta_min          1.81
_diffrn_reflns_theta_max          29.00
_reflns_number_total              5100
_reflns_number_gt                 4291
_reflns_threshold_expression      >2\s(I)
 
_computing_data_collection        'Bruker Apex V7.51A'
_computing_cell_refinement        'Bruker Apex V7.51A'
_computing_data_reduction         'Bruker SAINT'
_computing_structure_solution     'SHELXS-97 (Sheldrick, 1997)'
_computing_structure_refinement   'SHELXL-97 (Sheldrick, 1997)'
_computing_molecular_graphics     'ORTEP-3v2.01 (Farrugia, 1997)' 
_computing_publication_material   'SHELXL-97'

#==============================================================================

# REFINEMENT DATA 

_refine_special_details
;
 All H atoms were positioned geometrically and refined using a riding model, 
 with C---H = 0.98 (methyl groups), 0.99\%A (methylene groups), 
 1.00\%A (methine groups) or 0.95 \%A (aryl CH) and with <i>U</i>~iso~(H) = 
 1.5 times <i>U</i>~eq~(C) (methyl groups) or with <i>U</i>~iso~(H) = 1.2 times 
 <i>U</i>~eq~(C) (methylene  groups, aryl CH, methine groups). Torsion angles 
 of all methyl groups were allowed to refine.
 
 Refinement of F^2^ against ALL reflections.  The weighted R-factor wR and
 goodness of fit S are based on F^2^, conventional R-factors R are based
 on F, with F set to zero for negative F^2^. The threshold expression of
 F^2^ > 2\s(F^2^) is used only for calculating R-factors(gt) etc. and is
 not relevant to the choice of reflections for refinement.  R-factors based
 on F^2^ are statistically about twice as large as those based on F, and R-
 factors based on ALL data will be even larger.
;
 
_refine_ls_structure_factor_coef  Fsqd
_refine_ls_matrix_type            full
_refine_ls_weighting_scheme       calc
_refine_ls_weighting_details
 'calc w=1/[\s^2^(Fo^2^)+(0.0606P)^2^+10.8234P] where P=(Fo^2^+2Fc^2^)/3'
_atom_sites_solution_primary      direct
_atom_sites_solution_secondary    difmap
_atom_sites_solution_hydrogens    geom
_refine_ls_hydrogen_treatment     constr
_refine_ls_extinction_method      none
_refine_ls_extinction_coef        ?
_refine_ls_abs_structure_details
 'Flack H D (1983), Acta Cryst. A39, 876-881'
_refine_ls_abs_structure_Flack    0.03(10)
_refine_ls_number_reflns          5100
_refine_ls_number_parameters      268
_refine_ls_number_restraints      1
_refine_ls_R_factor_all           0.0640
_refine_ls_R_factor_gt            0.0525
_refine_ls_wR_factor_ref          0.1386
_refine_ls_wR_factor_gt           0.1335
_refine_ls_goodness_of_fit_ref    1.069
_refine_ls_restrained_S_all       1.069
_refine_ls_shift/su_max           0.001
_refine_ls_shift/su_mean          0.000

#==============================================================================

# ATOMIC COORDINATES AND DISPLACEMENT PARAMETERS
 
loop_
 _atom_site_label
 _atom_site_type_symbol
 _atom_site_fract_x
 _atom_site_fract_y
 _atom_site_fract_z
 _atom_site_U_iso_or_equiv
 _atom_site_adp_type
 _atom_site_occupancy
 _atom_site_symmetry_multiplicity
 _atom_site_calc_flag
 _atom_site_refinement_flags
 _atom_site_disorder_assembly
 _atom_site_disorder_group
Cl1 Cl 0.00714(11) 1.00791(3) -0.12663(17) 0.0524(5) Uani 0.50 1 d P . .
Cl2 Cl -0.00990(11) 0.99181(5) 0.50577(18) 0.0631(7) Uani 0.50 1 d P . .
P1 P 0.03204(6) 1.01785(3) 0.10586(16) 0.0276(3) Uani 0.50 1 d P . .
P2 P -0.03514(6) 0.98233(3) 0.27474(17) 0.0294(3) Uani 0.50 1 d P . .
N1 N -0.03688(8) 1.01717(4) 0.1890(3) 0.0254(4) Uani 1 1 d . . .
C17 C 0.03844(11) 1.08823(5) 0.1820(4) 0.0305(5) Uani 1 1 d . . .
C6 C -0.06956(10) 1.06919(5) 0.1742(3) 0.0268(5) Uani 1 1 d . . .
C8 C -0.17780(10) 0.98207(5) 0.1813(4) 0.0315(5) Uani 1 1 d . . .
C2 C -0.13948(10) 1.03165(5) 0.2739(3) 0.0292(5) Uani 1 1 d . . .
C1 C -0.08237(10) 1.03925(5) 0.2118(3) 0.0241(5) Uani 1 1 d . . .
C16 C -0.01201(11) 1.07862(5) 0.0944(3) 0.0282(5) Uani 1 1 d . . .
C10 C -0.20890(12) 0.94407(6) 0.3663(4) 0.0425(7) Uani 1 1 d . . .
C21 C -0.00924(13) 1.07901(6) -0.0708(4) 0.0409(6) Uani 1 1 d . . .
C19 C 0.09472(14) 1.09730(6) -0.0577(4) 0.0443(7) Uani 1 1 d . . .
C18 C 0.09082(12) 1.09743(6) 0.1045(4) 0.0368(6) Uani 1 1 d . . .
H18 H 0.1248 1.1040 0.1644 0.044 Uiso 1 1 calc R . .
C12 C -0.16539(12) 0.99034(6) 0.4617(3) 0.0369(6) Uani 1 1 d . . .
C7 C -0.15945(11) 1.00026(5) 0.3063(3) 0.0280(5) Uani 1 1 d . . .
C5 C -0.11311(12) 1.09083(5) 0.2093(4) 0.0388(7) Uani 1 1 d . . .
H5 H -0.1044 1.1111 0.1866 0.047 Uiso 1 1 calc R . .
C9 C -0.20205(11) 0.95425(6) 0.2129(4) 0.0398(7) Uani 1 1 d . . .
H9 H -0.2142 0.9419 0.1280 0.048 Uiso 1 1 calc R . .
C22 C 0.03644(15) 1.08854(9) 0.3592(4) 0.0518(8) Uani 1 1 d . . .
H22A H 0.0094 1.1045 0.3948 0.078 Uiso 1 1 calc R . .
H22B H 0.0776 1.0919 0.4005 0.078 Uiso 1 1 calc R . .
H22C H 0.0210 1.0694 0.3974 0.078 Uiso 1 1 calc R . .
C3 C -0.18117(12) 1.05429(6) 0.3079(4) 0.0398(7) Uani 1 1 d . . .
H3 H -0.2193 1.0494 0.3541 0.048 Uiso 1 1 calc R . .
C11 C -0.18905(13) 0.96187(7) 0.4876(4) 0.0438(7) Uani 1 1 d . . .
H11 H -0.1915 0.9546 0.5923 0.053 Uiso 1 1 calc R . .
C13 C -0.17222(14) 0.99208(7) 0.0125(4) 0.0416(6) Uani 1 1 d . . .
H13A H -0.1439 0.9790 -0.0434 0.062 Uiso 1 1 calc R . .
H13B H -0.1568 1.0125 0.0094 0.062 Uiso 1 1 calc R . .
H13C H -0.2123 0.9912 -0.0381 0.062 Uiso 1 1 calc R . .
C20 C 0.04329(16) 1.08805(7) -0.1437(4) 0.0497(8) Uani 1 1 d . . .
H20 H 0.0451 1.0881 -0.2554 0.060 Uiso 1 1 calc R . .
C4 C -0.16774(13) 1.08368(6) 0.2752(4) 0.0468(8) Uani 1 1 d . . .
H4 H -0.1965 1.0988 0.2987 0.056 Uiso 1 1 calc R . .
C24 C -0.06425(18) 1.06980(9) -0.1659(4) 0.0636(10) Uani 1 1 d . . .
H24A H -0.0951 1.0855 -0.1615 0.095 Uiso 1 1 calc R . .
H24B H -0.0812 1.0514 -0.1224 0.095 Uiso 1 1 calc R . .
H24C H -0.0521 1.0665 -0.2754 0.095 Uiso 1 1 calc R . .
C14 C -0.23857(16) 0.91418(7) 0.3994(5) 0.0635(11) Uani 1 1 d . . .
H14A H -0.2228 0.9062 0.4987 0.095 Uiso 1 1 calc R . .
H14B H -0.2292 0.9003 0.3137 0.095 Uiso 1 1 calc R . .
H14C H -0.2828 0.9167 0.4073 0.095 Uiso 1 1 calc R . .
C23 C 0.15303(16) 1.10598(9) -0.1408(5) 0.0622(10) Uani 1 1 d . . .
H23A H 0.1446 1.1220 -0.2160 0.093 Uiso 1 1 calc R . .
H23B H 0.1694 1.0887 -0.1969 0.093 Uiso 1 1 calc R . .
H23C H 0.1829 1.1129 -0.0632 0.093 Uiso 1 1 calc R . .
C15 C -0.14771(17) 1.00939(8) 0.5994(4) 0.0497(8) Uani 1 1 d . . .
H15A H -0.1231 1.0262 0.5626 0.075 Uiso 1 1 calc R . .
H15B H -0.1239 0.9975 0.6742 0.075 Uiso 1 1 calc R . .
H15C H -0.1845 1.0168 0.6514 0.075 Uiso 1 1 calc R . .
 
loop_
 _atom_site_aniso_label
 _atom_site_aniso_U_11
 _atom_site_aniso_U_22
 _atom_site_aniso_U_33
 _atom_site_aniso_U_23
 _atom_site_aniso_U_13
 _atom_site_aniso_U_12
Cl1 0.0655(13) 0.0564(13) 0.0352(6) 0.0007(6) 0.0036(8) 0.0193(12)
Cl2 0.0503(15) 0.105(2) 0.0342(7) 0.0077(9) 0.0003(8) 0.0224(12)
P1 0.0251(6) 0.0226(6) 0.0352(7) 0.0032(5) 0.0050(5) 0.0005(5)
P2 0.0230(6) 0.0248(6) 0.0404(8) 0.0085(5) 0.0043(5) 0.0027(4)
N1 0.0234(9) 0.0185(8) 0.0343(10) 0.0032(8) -0.0037(9) -0.0012(7)
C17 0.0274(12) 0.0213(10) 0.0428(14) -0.0002(11) 0.0011(11) -0.0006(9)
C6 0.0229(11) 0.0220(10) 0.0355(13) 0.0015(10) -0.0004(10) 0.0004(8)
C8 0.0200(10) 0.0310(11) 0.0436(15) 0.0055(11) 0.0017(11) -0.0003(9)
C2 0.0219(11) 0.0281(12) 0.0376(14) 0.0066(10) -0.0017(10) 0.0000(9)
C1 0.0218(10) 0.0223(10) 0.0282(12) 0.0034(9) -0.0008(9) 0.0007(8)
C16 0.0270(12) 0.0174(10) 0.0402(14) 0.0016(9) 0.0017(10) -0.0005(9)
C10 0.0297(14) 0.0270(12) 0.071(2) 0.0113(13) 0.0085(14) -0.0008(10)
C21 0.0459(16) 0.0376(14) 0.0392(15) 0.0051(13) -0.0027(14) -0.0095(12)
C19 0.0452(16) 0.0364(14) 0.0513(18) 0.0064(13) 0.0148(15) -0.0055(12)
C18 0.0314(13) 0.0264(12) 0.0527(18) -0.0004(12) 0.0030(12) -0.0011(10)
C12 0.0291(13) 0.0415(14) 0.0401(16) 0.0122(12) 0.0009(11) -0.0006(11)
C7 0.0183(10) 0.0265(11) 0.0391(13) 0.0063(9) 0.0008(10) -0.0007(9)
C5 0.0346(13) 0.0211(11) 0.0606(19) 0.0029(12) 0.0049(13) 0.0016(9)
C9 0.0248(12) 0.0302(13) 0.065(2) -0.0028(13) 0.0024(13) 0.0005(10)
C22 0.0469(18) 0.069(2) 0.0400(18) -0.0070(15) -0.0007(15) -0.0164(16)
C3 0.0216(12) 0.0307(13) 0.067(2) 0.0058(12) 0.0083(12) -0.0004(10)
C11 0.0392(15) 0.0411(15) 0.0511(18) 0.0181(13) 0.0115(13) 0.0017(12)
C13 0.0440(16) 0.0411(15) 0.0397(16) 0.0005(13) 0.0001(13) -0.0039(12)
C20 0.062(2) 0.0492(17) 0.0378(17) 0.0008(13) 0.0117(15) -0.0148(15)
C4 0.0293(13) 0.0320(14) 0.079(2) 0.0021(14) 0.0053(15) 0.0088(10)
C24 0.067(2) 0.079(3) 0.045(2) 0.0149(18) -0.0144(17) -0.027(2)
C14 0.054(2) 0.0318(14) 0.105(3) 0.0181(18) 0.021(2) -0.0062(14)
C23 0.052(2) 0.067(2) 0.067(2) 0.0000(19) 0.0207(19) -0.0172(17)
C15 0.0531(19) 0.0570(19) 0.0392(17) 0.0058(15) -0.0027(15) -0.0073(15)

#==============================================================================

# MOLECULAR GEOMETRY
 
_geom_special_details
;
 All s.u.'s (except the s.u. in the dihedral angle between two l.s. planes)
 are estimated using the full covariance matrix.  The cell s.u.'s are taken
 into account individually in the estimation of s.u.'s in distances, angles
 and torsion angles; correlations between s.u.'s in cell parameters are only
 used when they are defined by crystal symmetry.  An approximate (isotropic)
 treatment of cell s.u.'s is used for estimating s.u.'s involving l.s. planes.
;
 
loop_
 _geom_bond_atom_site_label_1
 _geom_bond_atom_site_label_2
 _geom_bond_distance
 _geom_bond_site_symmetry_2
 _geom_bond_publ_flag
Cl1 Cl1 0.777(3) 2_575 ?
Cl1 P1 2.099(2) . ?
Cl1 P1 2.447(2) 2_575 ?
Cl2 Cl2 0.855(4) 2_575 ?
Cl2 P2 2.085(2) . ?
Cl2 P2 2.487(2) 2_575 ?
P1 P2 1.4373(19) 2_575 ?
P1 N1 1.669(2) . ?
P1 N1 1.729(2) 2_575 ?
P1 P1 2.133(2) 2_575 ?
P1 Cl1 2.447(2) 2_575 ?
P1 P2 2.6043(16) . ?
P2 P1 1.4373(19) 2_575 ?
P2 N1 1.728(2) . ?
P2 N1 1.740(2) 2_575 ?
P2 P2 2.214(3) 2_575 ?
P2 Cl2 2.487(2) 2_575 ?
N1 C1 1.421(3) . ?
N1 P1 1.729(2) 2_575 ?
N1 P2 1.740(2) 2_575 ?
C17 C18 1.387(4) . ?
C17 C16 1.402(4) . ?
C17 C22 1.507(4) . ?
C6 C5 1.395(3) . ?
C6 C1 1.412(3) . ?
C6 C16 1.495(3) . ?
C8 C9 1.385(3) . ?
C8 C7 1.400(4) . ?
C8 C13 1.509(4) . ?
C2 C3 1.398(3) . ?
C2 C1 1.402(3) . ?
C2 C7 1.503(3) . ?
C16 C21 1.405(4) . ?
C10 C11 1.376(5) . ?
C10 C9 1.390(5) . ?
C10 C14 1.519(4) . ?
C21 C20 1.370(4) . ?
C21 C24 1.510(4) . ?
C19 C18 1.381(5) . ?
C19 C20 1.407(5) . ?
C19 C23 1.512(4) . ?
C18 H18 0.9500 . ?
C12 C11 1.398(4) . ?
C12 C7 1.400(4) . ?
C12 C15 1.502(5) . ?
C5 C4 1.361(4) . ?
C5 H5 0.9500 . ?
C9 H9 0.9500 . ?
C22 H22A 0.9800 . ?
C22 H22B 0.9800 . ?
C22 H22C 0.9800 . ?
C3 C4 1.381(4) . ?
C3 H3 0.9500 . ?
C11 H11 0.9500 . ?
C13 H13A 0.9800 . ?
C13 H13B 0.9800 . ?
C13 H13C 0.9800 . ?
C20 H20 0.9500 . ?
C4 H4 0.9500 . ?
C24 H24A 0.9800 . ?
C24 H24B 0.9800 . ?
C24 H24C 0.9800 . ?
C14 H14A 0.9800 . ?
C14 H14B 0.9800 . ?
C14 H14C 0.9800 . ?
C23 H23A 0.9800 . ?
C23 H23B 0.9800 . ?
C23 H23C 0.9800 . ?
C15 H15A 0.9800 . ?
C15 H15B 0.9800 . ?
C15 H15C 0.9800 . ?
 
loop_
 _geom_angle_atom_site_label_1
 _geom_angle_atom_site_label_2
 _geom_angle_atom_site_label_3
 _geom_angle
 _geom_angle_site_symmetry_1
 _geom_angle_site_symmetry_3
 _geom_angle_publ_flag
Cl1 Cl1 P1 107.44(7) 2_575 . ?
Cl1 Cl1 P1 54.92(8) 2_575 2_575 ?
P1 Cl1 P1 55.35(7) . 2_575 ?
Cl2 Cl2 P2 108.12(9) 2_575 . ?
Cl2 Cl2 P2 52.81(6) 2_575 2_575 ?
P2 Cl2 P2 57.12(7) . 2_575 ?
P2 P1 N1 67.66(11) 2_575 . ?
P2 P1 N1 65.40(11) 2_575 2_575 ?
N1 P1 N1 82.29(12) . 2_575 ?
P2 P1 Cl1 162.15(11) 2_575 . ?
N1 P1 Cl1 99.15(12) . . ?
N1 P1 Cl1 101.95(10) 2_575 . ?
P2 P1 P1 91.55(7) 2_575 2_575 ?
N1 P1 P1 52.36(8) . 2_575 ?
N1 P1 P1 49.87(8) 2_575 2_575 ?
Cl1 P1 P1 70.63(6) . 2_575 ?
P2 P1 Cl1 145.17(10) 2_575 2_575 ?
N1 P1 Cl1 90.87(11) . 2_575 ?
N1 P1 Cl1 85.46(9) 2_575 2_575 ?
Cl1 P1 Cl1 17.64(8) . 2_575 ?
P1 P1 Cl1 54.02(5) 2_575 2_575 ?
P2 P1 P2 58.18(9) 2_575 . ?
N1 P1 P2 40.78(7) . . ?
N1 P1 P2 41.51(7) 2_575 . ?
Cl1 P1 P2 103.97(8) . . ?
P1 P1 P2 33.48(4) 2_575 . ?
Cl1 P1 P2 87.50(7) 2_575 . ?
P1 P2 N1 65.46(11) 2_575 . ?
P1 P2 N1 62.52(10) 2_575 2_575 ?
N1 P2 N1 80.30(12) . 2_575 ?
P1 P2 Cl2 158.38(11) 2_575 . ?
N1 P2 Cl2 102.60(12) . . ?
N1 P2 Cl2 98.68(12) 2_575 . ?
P1 P2 P2 88.34(7) 2_575 2_575 ?
N1 P2 P2 50.57(8) . 2_575 ?
N1 P2 P2 50.08(8) 2_575 2_575 ?
Cl2 P2 P2 70.63(6) . 2_575 ?
P1 P2 Cl2 140.59(10) 2_575 2_575 ?
N1 P2 Cl2 85.31(10) . 2_575 ?
N1 P2 Cl2 87.94(10) 2_575 2_575 ?
Cl2 P2 Cl2 19.07(10) . 2_575 ?
P2 P2 Cl2 52.25(5) 2_575 2_575 ?
P1 P2 P1 54.97(8) 2_575 . ?
N1 P2 P1 39.12(7) . . ?
N1 P2 P1 41.18(7) 2_575 . ?
Cl2 P2 P1 104.11(8) . . ?
P2 P2 P1 33.48(4) 2_575 . ?
Cl2 P2 P1 85.63(6) 2_575 . ?
C1 N1 P1 132.93(16) . . ?
C1 N1 P2 126.23(17) . . ?
P1 N1 P2 100.10(11) . . ?
C1 N1 P1 137.31(16) . 2_575 ?
P1 N1 P1 77.76(11) . 2_575 ?
P2 N1 P1 49.14(8) . 2_575 ?
C1 N1 P2 124.85(16) . 2_575 ?
P1 N1 P2 49.82(8) . 2_575 ?
P2 N1 P2 79.34(11) . 2_575 ?
P1 N1 P2 97.32(11) 2_575 2_575 ?
C18 C17 C16 119.6(3) . . ?
C18 C17 C22 119.7(3) . . ?
C16 C17 C22 120.7(2) . . ?
C5 C6 C1 118.7(2) . . ?
C5 C6 C16 118.5(2) . . ?
C1 C6 C16 122.8(2) . . ?
C9 C8 C7 119.3(3) . . ?
C9 C8 C13 119.0(3) . . ?
C7 C8 C13 121.7(2) . . ?
C3 C2 C1 119.0(2) . . ?
C3 C2 C7 117.1(2) . . ?
C1 C2 C7 123.9(2) . . ?
C2 C1 C6 119.7(2) . . ?
C2 C1 N1 120.6(2) . . ?
C6 C1 N1 119.7(2) . . ?
C17 C16 C21 119.5(2) . . ?
C17 C16 C6 120.9(2) . . ?
C21 C16 C6 119.6(2) . . ?
C11 C10 C9 118.5(2) . . ?
C11 C10 C14 120.7(3) . . ?
C9 C10 C14 120.8(3) . . ?
C20 C21 C16 119.5(3) . . ?
C20 C21 C24 120.7(3) . . ?
C16 C21 C24 119.8(3) . . ?
C18 C19 C20 118.1(3) . . ?
C18 C19 C23 121.2(3) . . ?
C20 C19 C23 120.7(3) . . ?
C19 C18 C17 121.6(3) . . ?
C19 C18 H18 119.2 . . ?
C17 C18 H18 119.2 . . ?
C11 C12 C7 118.4(3) . . ?
C11 C12 C15 119.7(3) . . ?
C7 C12 C15 122.0(3) . . ?
C12 C7 C8 120.2(2) . . ?
C12 C7 C2 120.0(2) . . ?
C8 C7 C2 119.5(2) . . ?
C4 C5 C6 121.7(2) . . ?
C4 C5 H5 119.1 . . ?
C6 C5 H5 119.1 . . ?
C8 C9 C10 121.4(3) . . ?
C8 C9 H9 119.3 . . ?
C10 C9 H9 119.3 . . ?
C17 C22 H22A 109.5 . . ?
C17 C22 H22B 109.5 . . ?
H22A C22 H22B 109.5 . . ?
C17 C22 H22C 109.5 . . ?
H22A C22 H22C 109.5 . . ?
H22B C22 H22C 109.5 . . ?
C4 C3 C2 121.0(2) . . ?
C4 C3 H3 119.5 . . ?
C2 C3 H3 119.5 . . ?
C10 C11 C12 122.1(3) . . ?
C10 C11 H11 118.9 . . ?
C12 C11 H11 118.9 . . ?
C8 C13 H13A 109.5 . . ?
C8 C13 H13B 109.5 . . ?
H13A C13 H13B 109.5 . . ?
C8 C13 H13C 109.5 . . ?
H13A C13 H13C 109.5 . . ?
H13B C13 H13C 109.5 . . ?
C21 C20 C19 121.8(3) . . ?
C21 C20 H20 119.1 . . ?
C19 C20 H20 119.1 . . ?
C5 C4 C3 119.7(2) . . ?
C5 C4 H4 120.1 . . ?
C3 C4 H4 120.1 . . ?
C21 C24 H24A 109.5 . . ?
C21 C24 H24B 109.5 . . ?
H24A C24 H24B 109.5 . . ?
C21 C24 H24C 109.5 . . ?
H24A C24 H24C 109.5 . . ?
H24B C24 H24C 109.5 . . ?
C10 C14 H14A 109.5 . . ?
C10 C14 H14B 109.5 . . ?
H14A C14 H14B 109.5 . . ?
C10 C14 H14C 109.5 . . ?
H14A C14 H14C 109.5 . . ?
H14B C14 H14C 109.5 . . ?
C19 C23 H23A 109.5 . . ?
C19 C23 H23B 109.5 . . ?
H23A C23 H23B 109.5 . . ?
C19 C23 H23C 109.5 . . ?
H23A C23 H23C 109.5 . . ?
H23B C23 H23C 109.5 . . ?
C12 C15 H15A 109.5 . . ?
C12 C15 H15B 109.5 . . ?
H15A C15 H15B 109.5 . . ?
C12 C15 H15C 109.5 . . ?
H15A C15 H15C 109.5 . . ?
H15B C15 H15C 109.5 . . ?
 
loop_
 _geom_torsion_atom_site_label_1
 _geom_torsion_atom_site_label_2
 _geom_torsion_atom_site_label_3
 _geom_torsion_atom_site_label_4
 _geom_torsion
 _geom_torsion_site_symmetry_1
 _geom_torsion_site_symmetry_2
 _geom_torsion_site_symmetry_3
 _geom_torsion_site_symmetry_4
 _geom_torsion_publ_flag
Cl1 Cl1 P1 P2 -21.9(7) 2_575 . . 2_575 ?
P1 Cl1 P1 P2 -3.7(4) 2_575 . . 2_575 ?
Cl1 Cl1 P1 N1 -62.9(4) 2_575 . . . ?
P1 Cl1 P1 N1 -44.58(8) 2_575 . . . ?
Cl1 Cl1 P1 N1 21.1(4) 2_575 . . 2_575 ?
P1 Cl1 P1 N1 39.40(8) 2_575 . . 2_575 ?
Cl1 Cl1 P1 P1 -18.3(4) 2_575 . . 2_575 ?
P1 Cl1 P1 Cl1 18.3(4) 2_575 . . 2_575 ?
Cl1 Cl1 P1 P2 -21.5(4) 2_575 . . . ?
P1 Cl1 P1 P2 -3.20(5) 2_575 . . . ?
Cl2 Cl2 P2 P1 28.3(7) 2_575 . . 2_575 ?
P2 Cl2 P2 P1 14.0(3) 2_575 . . 2_575 ?
Cl2 Cl2 P2 N1 -25.5(4) 2_575 . . . ?
P2 Cl2 P2 N1 -39.79(8) 2_575 . . . ?
Cl2 Cl2 P2 N1 56.4(4) 2_575 . . 2_575 ?
P2 Cl2 P2 N1 42.12(8) 2_575 . . 2_575 ?
Cl2 Cl2 P2 P2 14.3(4) 2_575 . . 2_575 ?
P2 Cl2 P2 Cl2 -14.3(4) 2_575 . . 2_575 ?
Cl2 Cl2 P2 P1 14.7(4) 2_575 . . . ?
P2 Cl2 P2 P1 0.43(6) 2_575 . . . ?
P2 P1 P2 P1 -174.69(18) 2_575 . . 2_575 ?
N1 P1 P2 P1 93.33(16) . . . 2_575 ?
N1 P1 P2 P1 -86.88(15) 2_575 . . 2_575 ?
Cl1 P1 P2 P1 5.47(8) . . . 2_575 ?
Cl1 P1 P2 P1 -0.91(9) 2_575 . . 2_575 ?
P2 P1 P2 N1 91.98(15) 2_575 . . . ?
N1 P1 P2 N1 179.8(2) 2_575 . . . ?
Cl1 P1 P2 N1 -87.85(15) . . . . ?
P1 P1 P2 N1 -93.33(16) 2_575 . . . ?
Cl1 P1 P2 N1 -94.24(14) 2_575 . . . ?
P2 P1 P2 N1 -87.81(15) 2_575 . . 2_575 ?
N1 P1 P2 N1 -179.8(2) . . . 2_575 ?
Cl1 P1 P2 N1 92.35(14) . . . 2_575 ?
P1 P1 P2 N1 86.88(15) 2_575 . . 2_575 ?
Cl1 P1 P2 N1 85.97(13) 2_575 . . 2_575 ?
P2 P1 P2 Cl2 -0.74(10) 2_575 . . . ?
N1 P1 P2 Cl2 -92.72(15) . . . . ?
N1 P1 P2 Cl2 87.08(15) 2_575 . . . ?
Cl1 P1 P2 Cl2 179.43(12) . . . . ?
P1 P1 P2 Cl2 173.95(14) 2_575 . . . ?
Cl1 P1 P2 Cl2 173.05(10) 2_575 . . . ?
N1 P1 P2 P2 -91.98(15) . . . 2_575 ?
N1 P1 P2 P2 87.81(15) 2_575 . . 2_575 ?
Cl1 P1 P2 P2 -179.83(13) . . . 2_575 ?
P1 P1 P2 P2 174.69(18) 2_575 . . 2_575 ?
Cl1 P1 P2 P2 173.79(12) 2_575 . . 2_575 ?
P2 P1 P2 Cl2 4.05(9) 2_575 . . 2_575 ?
N1 P1 P2 Cl2 -87.93(14) . . . 2_575 ?
N1 P1 P2 Cl2 91.86(14) 2_575 . . 2_575 ?
Cl1 P1 P2 Cl2 -175.79(10) . . . 2_575 ?
P1 P1 P2 Cl2 178.74(13) 2_575 . . 2_575 ?
Cl1 P1 P2 Cl2 177.83(10) 2_575 . . 2_575 ?
P2 P1 N1 C1 103.6(2) 2_575 . . . ?
N1 P1 N1 C1 170.2(2) 2_575 . . . ?
Cl1 P1 N1 C1 -88.9(2) . . . . ?
P1 P1 N1 C1 -145.6(3) 2_575 . . . ?
Cl1 P1 N1 C1 -104.6(2) 2_575 . . . ?
P2 P1 N1 C1 170.3(3) . . . . ?
P2 P1 N1 P2 -66.65(13) 2_575 . . . ?
N1 P1 N1 P2 -0.14(15) 2_575 . . . ?
Cl1 P1 N1 P2 100.81(11) . . . . ?
P1 P1 N1 P2 44.07(8) 2_575 . . . ?
Cl1 P1 N1 P2 85.16(11) 2_575 . . . ?
P2 P1 N1 P1 -110.72(11) 2_575 . . 2_575 ?
N1 P1 N1 P1 -44.20(13) 2_575 . . 2_575 ?
Cl1 P1 N1 P1 56.74(9) . . . 2_575 ?
Cl1 P1 N1 P1 41.09(8) 2_575 . . 2_575 ?
P2 P1 N1 P1 -44.07(8) . . . 2_575 ?
N1 P1 N1 P2 66.51(10) 2_575 . . 2_575 ?
Cl1 P1 N1 P2 167.46(11) . . . 2_575 ?
P1 P1 N1 P2 110.72(11) 2_575 . . 2_575 ?
Cl1 P1 N1 P2 151.81(10) 2_575 . . 2_575 ?
P2 P1 N1 P2 66.65(13) . . . 2_575 ?
P1 P2 N1 C1 124.8(2) 2_575 . . . ?
N1 P2 N1 C1 -171.06(19) 2_575 . . . ?
Cl2 P2 N1 C1 -74.2(2) . . . . ?
P2 P2 N1 C1 -125.7(2) 2_575 . . . ?
Cl2 P2 N1 C1 -82.3(2) 2_575 . . . ?
P1 P2 N1 C1 -171.2(3) . . . . ?
P1 P2 N1 P1 -63.98(13) 2_575 . . . ?
N1 P2 N1 P1 0.14(15) 2_575 . . . ?
Cl2 P2 N1 P1 96.95(13) . . . . ?
P2 P2 N1 P1 45.54(8) 2_575 . . . ?
Cl2 P2 N1 P1 88.84(12) 2_575 . . . ?
N1 P2 N1 P1 64.12(9) 2_575 . . 2_575 ?
Cl2 P2 N1 P1 160.93(12) . . . 2_575 ?
P2 P2 N1 P1 109.52(12) 2_575 . . 2_575 ?
Cl2 P2 N1 P1 152.82(11) 2_575 . . 2_575 ?
P1 P2 N1 P1 63.98(13) . . . 2_575 ?
P1 P2 N1 P2 -109.52(12) 2_575 . . 2_575 ?
N1 P2 N1 P2 -45.40(14) 2_575 . . 2_575 ?
Cl2 P2 N1 P2 51.41(11) . . . 2_575 ?
Cl2 P2 N1 P2 43.30(9) 2_575 . . 2_575 ?
P1 P2 N1 P2 -45.54(8) . . . 2_575 ?
C3 C2 C1 C6 -4.5(4) . . . . ?
C7 C2 C1 C6 175.2(2) . . . . ?
C3 C2 C1 N1 174.4(2) . . . . ?
C7 C2 C1 N1 -6.0(4) . . . . ?
C5 C6 C1 C2 3.9(4) . . . . ?
C16 C6 C1 C2 -174.4(2) . . . . ?
C5 C6 C1 N1 -174.9(2) . . . . ?
C16 C6 C1 N1 6.8(4) . . . . ?
P1 N1 C1 C2 174.0(2) . . . . ?
P2 N1 C1 C2 -17.9(3) . . . . ?
P1 N1 C1 C2 48.5(4) 2_575 . . . ?
P2 N1 C1 C2 -121.2(2) 2_575 . . . ?
P1 N1 C1 C6 -7.1(4) . . . . ?
P2 N1 C1 C6 161.0(2) . . . . ?
P1 N1 C1 C6 -132.7(2) 2_575 . . . ?
P2 N1 C1 C6 57.7(3) 2_575 . . . ?
C18 C17 C16 C21 -1.3(4) . . . . ?
C22 C17 C16 C21 179.0(3) . . . . ?
C18 C17 C16 C6 -178.7(2) . . . . ?
C22 C17 C16 C6 1.6(4) . . . . ?
C5 C6 C16 C17 87.5(3) . . . . ?
C1 C6 C16 C17 -94.2(3) . . . . ?
C5 C6 C16 C21 -89.9(3) . . . . ?
C1 C6 C16 C21 88.4(3) . . . . ?
C17 C16 C21 C20 1.7(4) . . . . ?
C6 C16 C21 C20 179.1(3) . . . . ?
C17 C16 C21 C24 -177.7(3) . . . . ?
C6 C16 C21 C24 -0.2(4) . . . . ?
C20 C19 C18 C17 1.2(4) . . . . ?
C23 C19 C18 C17 -177.0(3) . . . . ?
C16 C17 C18 C19 -0.2(4) . . . . ?
C22 C17 C18 C19 179.5(3) . . . . ?
C11 C12 C7 C8 1.0(4) . . . . ?
C15 C12 C7 C8 -178.5(3) . . . . ?
C11 C12 C7 C2 174.6(2) . . . . ?
C15 C12 C7 C2 -4.9(4) . . . . ?
C9 C8 C7 C12 0.2(3) . . . . ?
C13 C8 C7 C12 179.8(3) . . . . ?
C9 C8 C7 C2 -173.4(2) . . . . ?
C13 C8 C7 C2 6.2(3) . . . . ?
C3 C2 C7 C12 -71.0(3) . . . . ?
C1 C2 C7 C12 109.3(3) . . . . ?
C3 C2 C7 C8 102.6(3) . . . . ?
C1 C2 C7 C8 -77.0(3) . . . . ?
C1 C6 C5 C4 -1.5(5) . . . . ?
C16 C6 C5 C4 176.9(3) . . . . ?
C7 C8 C9 C10 0.4(4) . . . . ?
C13 C8 C9 C10 -179.2(3) . . . . ?
C11 C10 C9 C8 -2.2(4) . . . . ?
C14 C10 C9 C8 176.8(3) . . . . ?
C1 C2 C3 C4 2.6(4) . . . . ?
C7 C2 C3 C4 -177.1(3) . . . . ?
C9 C10 C11 C12 3.5(4) . . . . ?
C14 C10 C11 C12 -175.5(3) . . . . ?
C7 C12 C11 C10 -2.9(4) . . . . ?
C15 C12 C11 C10 176.6(3) . . . . ?
C16 C21 C20 C19 -0.6(5) . . . . ?
C24 C21 C20 C19 178.7(3) . . . . ?
C18 C19 C20 C21 -0.8(5) . . . . ?
C23 C19 C20 C21 177.5(3) . . . . ?
C6 C5 C4 C3 -0.4(5) . . . . ?
C2 C3 C4 C5 -0.1(5) . . . . ?
 
_diffrn_measured_fraction_theta_max    0.999
_diffrn_reflns_theta_full              29.00
_diffrn_measured_fraction_theta_full   0.999
_refine_diff_density_max    0.246
_refine_diff_density_min   -0.318
_refine_diff_density_rms    0.050

#=============================================================================
 
data_is_aw120_(dippnpcl)2

_audit_author_name                'Villinger, A.' 
_audit_creation_method            SHELXL-97 

#==============================================================================

# CHEMICAL DATA

_chemical_name_systematic
;
1,3-dichloro-2,4-bis(2,6-disopropylphenyl)-cyclo-1,3-diphospha-2,4-diazane
;
_chemical_name_common             ?
_chemical_melting_point           ?
_chemical_formula_moiety          'C24 H34 Cl2 N2 P2'
_chemical_formula_sum
 'C24 H34 Cl2 N2 P2'
_chemical_formula_weight          483.37
 
loop_
 _atom_type_symbol
 _atom_type_description
 _atom_type_scat_dispersion_real
 _atom_type_scat_dispersion_imag
 _atom_type_scat_source
 'C'  'C'   0.0033   0.0016
 'International Tables Vol C Tables 4.2.6.8 and 6.1.1.4'
 'H'  'H'   0.0000   0.0000
 'International Tables Vol C Tables 4.2.6.8 and 6.1.1.4'
 'N'  'N'   0.0061   0.0033
 'International Tables Vol C Tables 4.2.6.8 and 6.1.1.4'
 'P'  'P'   0.1023   0.0942
 'International Tables Vol C Tables 4.2.6.8 and 6.1.1.4'
 'Cl'  'Cl'   0.1484   0.1585
 'International Tables Vol C Tables 4.2.6.8 and 6.1.1.4'
 
#==============================================================================

# CRYSTAL DATA
 
_symmetry_cell_setting            monoclinic
_symmetry_space_group_name_H-M    'P 21'
_symmetry_space_group_name_Hall   'P 2yb'
_symmetry_Int_Tables_number       4
 
loop_
 _symmetry_equiv_pos_as_xyz
 'x, y, z'
 '-x, y+1/2, -z'
 
_cell_length_a                    9.7403(3)
_cell_length_b                    17.4140(6)
_cell_length_c                    15.9047(5)
_cell_angle_alpha                 90.00
_cell_angle_beta                  103.603(2)
_cell_angle_gamma                 90.00
_cell_volume                      2622.04(15)
_cell_formula_units_Z             4
_cell_measurement_temperature     173(2)
_cell_measurement_reflns_used     9891
_cell_measurement_theta_min       5.059 
_cell_measurement_theta_max       58.118
 
_exptl_crystal_description        block
_exptl_crystal_colour             colourless
_exptl_crystal_size_max           0.47
_exptl_crystal_size_mid           0.24
_exptl_crystal_size_min           0.16
_exptl_crystal_density_meas       ?
_exptl_crystal_density_diffrn     1.224
_exptl_crystal_density_method     'not measured'
_exptl_crystal_F_000              1024
_exptl_absorpt_coefficient_mu     0.383
_exptl_absorpt_correction_type    multi-scan
_exptl_absorpt_correction_T_min   0.8404
_exptl_absorpt_correction_T_max   0.9412
_exptl_absorpt_process_details    '(SADABS; Sheldrick, 2004)'

#==============================================================================

# EXPERIMENTAL DATA
 
_exptl_special_details
;
 ?
;
 
_diffrn_ambient_temperature       173(2)
_diffrn_radiation_wavelength      0.71073
_diffrn_radiation_type            MoK\a
_diffrn_radiation_source          'sealed tube'
_diffrn_radiation_monochromator   graphite
_diffrn_measurement_device_type   'Bruker-Nonius Apex X8-CCD-diffractometer'
_diffrn_measurement_method        'phi and omega scans'
_diffrn_detector_area_resol_mean  ?
_diffrn_standards_number          ?
_diffrn_standards_interval_count  ?
_diffrn_standards_interval_time   ?
_diffrn_standards_decay_%         ?
_diffrn_reflns_number             35461
_diffrn_reflns_av_R_equivalents   0.0289
_diffrn_reflns_av_sigmaI/netI     0.0498
_diffrn_reflns_limit_h_min        -13
_diffrn_reflns_limit_h_max        13
_diffrn_reflns_limit_k_min        -24
_diffrn_reflns_limit_k_max        20
_diffrn_reflns_limit_l_min        -18
_diffrn_reflns_limit_l_max        22
_diffrn_reflns_theta_min          2.77
_diffrn_reflns_theta_max          30.00
_reflns_number_total              13525
_reflns_number_gt                 11191
_reflns_threshold_expression      >2\s(I)
 
_computing_data_collection        'Bruker Apex V7.51A'
_computing_cell_refinement        'Bruker Apex V7.51A'
_computing_data_reduction         'Bruker SAINT'
_computing_structure_solution     'SHELXS-97 (Sheldrick, 1997)'
_computing_structure_refinement   'SHELXL-97 (Sheldrick, 1997)'
_computing_molecular_graphics     'ORTEP-3v2.01 (Farrugia, 1997)' 
_computing_publication_material   'SHELXL-97'

#==============================================================================

# REFINEMENT DATA 

_refine_special_details
;
 All H atoms were positioned geometrically and refined using a riding model, 
 with C---H = 0.98 (methyl groups), 0.99\%A (methylene groups), 
 1.00\%A (methine groups) or 0.95 \%A (aryl CH) and with <i>U</i>~iso~(H) = 
 1.5 times <i>U</i>~eq~(C) (methyl groups) or with <i>U</i>~iso~(H) = 1.2 times 
 <i>U</i>~eq~(C) (methylene  groups, aryl CH, methine groups). Torsion angles 
 of all methyl groups were allowed to refine.
 
 Refinement of F^2^ against ALL reflections.  The weighted R-factor wR and
 goodness of fit S are based on F^2^, conventional R-factors R are based
 on F, with F set to zero for negative F^2^. The threshold expression of
 F^2^ > 2\s(F^2^) is used only for calculating R-factors(gt) etc. and is
 not relevant to the choice of reflections for refinement.  R-factors based
 on F^2^ are statistically about twice as large as those based on F, and R-
 factors based on ALL data will be even larger.
;
 
_refine_ls_structure_factor_coef  Fsqd
_refine_ls_matrix_type            full
_refine_ls_weighting_scheme       calc
_refine_ls_weighting_details
 'calc w=1/[\s^2^(Fo^2^)+(0.0450P)^2^+0.4332P] where P=(Fo^2^+2Fc^2^)/3'
_atom_sites_solution_primary      direct
_atom_sites_solution_secondary    difmap
_atom_sites_solution_hydrogens    geom
_refine_ls_hydrogen_treatment     constr
_refine_ls_extinction_method      none
_refine_ls_extinction_coef        ?
_refine_ls_abs_structure_details
 'Flack H D (1983), Acta Cryst. A39, 876-881'
_refine_ls_abs_structure_Flack    0.50(5)
_refine_ls_number_reflns          13525
_refine_ls_number_parameters      558
_refine_ls_number_restraints      1
_refine_ls_R_factor_all           0.0658
_refine_ls_R_factor_gt            0.0483
_refine_ls_wR_factor_ref          0.1043
_refine_ls_wR_factor_gt           0.0960
_refine_ls_goodness_of_fit_ref    1.048
_refine_ls_restrained_S_all       1.048
_refine_ls_shift/su_max           0.001
_refine_ls_shift/su_mean          0.000

#==============================================================================

# ATOMIC COORDINATES AND DISPLACEMENT PARAMETERS
 
loop_
 _atom_site_label
 _atom_site_type_symbol
 _atom_site_fract_x
 _atom_site_fract_y
 _atom_site_fract_z
 _atom_site_U_iso_or_equiv
 _atom_site_adp_type
 _atom_site_occupancy
 _atom_site_symmetry_multiplicity
 _atom_site_calc_flag
 _atom_site_refinement_flags
 _atom_site_disorder_assembly
 _atom_site_disorder_group
P1 P 0.55180(6) 0.33114(4) 0.79389(4) 0.02540(14) Uani 1 1 d . . .
P2 P 0.36239(6) 0.42974(4) 0.72426(4) 0.02502(14) Uani 1 1 d . . .
N1 N 0.39464(18) 0.33366(13) 0.71876(13) 0.0228(4) Uani 1 1 d . . .
N2 N 0.50295(19) 0.42283(13) 0.81112(13) 0.0248(4) Uani 1 1 d . . .
Cl1 Cl 0.50616(8) 0.26489(4) 0.89378(5) 0.03863(17) Uani 1 1 d . . .
Cl2 Cl 0.18828(7) 0.43849(4) 0.78026(5) 0.04029(18) Uani 1 1 d . . .
C1 C 0.3434(2) 0.28174(15) 0.64833(15) 0.0210(5) Uani 1 1 d . . .
C2 C 0.4042(2) 0.28270(15) 0.57586(16) 0.0242(5) Uani 1 1 d . . .
C3 C 0.3506(3) 0.23214(17) 0.50859(17) 0.0324(6) Uani 1 1 d . . .
H3 H 0.3899 0.2314 0.4593 0.039 Uiso 1 1 calc R . .
C4 C 0.2416(3) 0.18330(18) 0.51227(19) 0.0363(7) Uani 1 1 d . . .
H4 H 0.2055 0.1497 0.4652 0.044 Uiso 1 1 calc R . .
C5 C 0.1837(3) 0.18241(17) 0.58349(18) 0.0314(6) Uani 1 1 d . . .
H5 H 0.1088 0.1479 0.5850 0.038 Uiso 1 1 calc R . .
C6 C 0.2336(2) 0.23146(15) 0.65328(16) 0.0230(5) Uani 1 1 d . . .
C7 C 0.5205(2) 0.33856(18) 0.56831(17) 0.0301(6) Uani 1 1 d . . .
H7 H 0.5489 0.3665 0.6246 0.036 Uiso 1 1 calc R . .
C8 C 0.4700(3) 0.3978(2) 0.4991(3) 0.0579(10) Uani 1 1 d . . .
H8A H 0.4455 0.3726 0.4424 0.087 Uiso 1 1 calc R . .
H8B H 0.5451 0.4355 0.5001 0.087 Uiso 1 1 calc R . .
H8C H 0.3865 0.4238 0.5097 0.087 Uiso 1 1 calc R . .
C9 C 0.6518(3) 0.2978(2) 0.5540(3) 0.0640(11) Uani 1 1 d . . .
H9A H 0.6825 0.2590 0.5991 0.096 Uiso 1 1 calc R . .
H9B H 0.7276 0.3354 0.5565 0.096 Uiso 1 1 calc R . .
H9C H 0.6296 0.2729 0.4971 0.096 Uiso 1 1 calc R . .
C10 C 0.1677(3) 0.22815(16) 0.73069(18) 0.0282(6) Uani 1 1 d . . .
H10 H 0.2169 0.2671 0.7736 0.034 Uiso 1 1 calc R . .
C11 C 0.0109(3) 0.2489(2) 0.7064(2) 0.0442(8) Uani 1 1 d . . .
H11A H -0.0399 0.2123 0.6633 0.066 Uiso 1 1 calc R . .
H11B H -0.0007 0.3009 0.6822 0.066 Uiso 1 1 calc R . .
H11C H -0.0274 0.2468 0.7581 0.066 Uiso 1 1 calc R . .
C12 C 0.1906(4) 0.14965(18) 0.7744(2) 0.0481(8) Uani 1 1 d . . .
H12A H 0.1493 0.1494 0.8249 0.072 Uiso 1 1 calc R . .
H12B H 0.2921 0.1391 0.7928 0.072 Uiso 1 1 calc R . .
H12C H 0.1451 0.1100 0.7334 0.072 Uiso 1 1 calc R . .
C13 C 0.5864(3) 0.48424(16) 0.85780(18) 0.0327(6) Uani 1 1 d . . .
C14 C 0.5823(3) 0.49606(17) 0.9442(2) 0.0406(7) Uani 1 1 d . . .
C15 C 0.6661(4) 0.5552(2) 0.9882(2) 0.0608(10) Uani 1 1 d . . .
H15 H 0.6658 0.5652 1.0468 0.073 Uiso 1 1 calc R . .
C16 C 0.7488(5) 0.5992(2) 0.9483(3) 0.0771(13) Uani 1 1 d . . .
H16 H 0.8054 0.6388 0.9801 0.093 Uiso 1 1 calc R . .
C17 C 0.7517(4) 0.5872(2) 0.8630(3) 0.0660(11) Uani 1 1 d . . .
H17 H 0.8100 0.6184 0.8368 0.079 Uiso 1 1 calc R . .
C18 C 0.6695(3) 0.52964(18) 0.8150(2) 0.0445(8) Uani 1 1 d . . .
C19 C 0.4947(3) 0.44789(18) 0.99036(18) 0.0378(7) Uani 1 1 d . . .
H19 H 0.4427 0.4093 0.9481 0.045 Uiso 1 1 calc R . .
C20 C 0.3859(4) 0.4952(2) 1.0216(2) 0.0667(11) Uani 1 1 d . . .
H20A H 0.3342 0.4621 1.0533 0.100 Uiso 1 1 calc R . .
H20B H 0.3197 0.5180 0.9718 0.100 Uiso 1 1 calc R . .
H20C H 0.4335 0.5361 1.0599 0.100 Uiso 1 1 calc R . .
C21 C 0.5880(3) 0.4039(2) 1.0656(2) 0.0520(9) Uani 1 1 d . . .
H21A H 0.6584 0.3740 1.0445 0.078 Uiso 1 1 calc R . .
H21B H 0.5293 0.3691 1.0907 0.078 Uiso 1 1 calc R . .
H21C H 0.6361 0.4403 1.1098 0.078 Uiso 1 1 calc R . .
C22 C 0.6736(3) 0.5197(2) 0.7221(2) 0.0489(8) Uani 1 1 d . . .
H22 H 0.6069 0.4771 0.6984 0.059 Uiso 1 1 calc R . .
C23 C 0.6211(4) 0.5915(3) 0.6680(3) 0.0756(13) Uani 1 1 d . . .
H23A H 0.6858 0.6344 0.6880 0.113 Uiso 1 1 calc R . .
H23B H 0.5264 0.6050 0.6745 0.113 Uiso 1 1 calc R . .
H23C H 0.6175 0.5811 0.6070 0.113 Uiso 1 1 calc R . .
C24 C 0.8197(4) 0.4951(3) 0.7120(3) 0.0843(14) Uani 1 1 d . . .
H24A H 0.8149 0.4832 0.6512 0.126 Uiso 1 1 calc R . .
H24B H 0.8505 0.4495 0.7475 0.126 Uiso 1 1 calc R . .
H24C H 0.8872 0.5370 0.7310 0.126 Uiso 1 1 calc R . .
P3 P 0.16325(6) 0.34351(4) 0.27409(4) 0.02662(15) Uani 1 1 d . . .
P4 P -0.03060(6) 0.44032(4) 0.20606(4) 0.02656(15) Uani 1 1 d . . .
N3 N 0.02586(19) 0.35082(13) 0.18557(13) 0.0258(4) Uani 1 1 d . . .
N4 N 0.12239(18) 0.43745(13) 0.28456(13) 0.0223(4) Uani 1 1 d . . .
Cl3 Cl 0.34189(6) 0.34369(5) 0.22169(5) 0.04445(19) Uani 1 1 d . . .
Cl4 Cl 0.02055(8) 0.51423(4) 0.11387(5) 0.04058(17) Uani 1 1 d . . .
C25 C -0.0438(2) 0.28894(16) 0.13171(17) 0.0299(6) Uani 1 1 d . . .
C26 C -0.0256(3) 0.28305(17) 0.04679(18) 0.0330(6) Uani 1 1 d . . .
C27 C -0.0886(3) 0.2218(2) -0.0038(2) 0.0509(8) Uani 1 1 d . . .
H27 H -0.0784 0.2172 -0.0616 0.061 Uiso 1 1 calc R . .
C28 C -0.1654(4) 0.1680(2) 0.0284(3) 0.0690(11) Uani 1 1 d . . .
H28 H -0.2059 0.1258 -0.0066 0.083 Uiso 1 1 calc R . .
C29 C -0.1843(4) 0.1747(2) 0.1115(2) 0.0590(10) Uani 1 1 d . . .
H29 H -0.2392 0.1374 0.1323 0.071 Uiso 1 1 calc R . .
C30 C -0.1242(3) 0.23562(18) 0.16614(19) 0.0378(7) Uani 1 1 d . . .
C31 C 0.0571(3) 0.34133(18) 0.00777(17) 0.0336(6) Uani 1 1 d . . .
H31 H 0.1007 0.3785 0.0543 0.040 Uiso 1 1 calc R . .
C32 C -0.0430(3) 0.3866(2) -0.0645(2) 0.0482(8) Uani 1 1 d . . .
H32A H -0.0814 0.3522 -0.1131 0.072 Uiso 1 1 calc R . .
H32B H 0.0092 0.4284 -0.0841 0.072 Uiso 1 1 calc R . .
H32C H -0.1206 0.4081 -0.0423 0.072 Uiso 1 1 calc R . .
C33 C 0.1764(3) 0.30437(19) -0.0258(2) 0.0441(7) Uani 1 1 d . . .
H33A H 0.2406 0.2773 0.0217 0.066 Uiso 1 1 calc R . .
H33B H 0.2286 0.3443 -0.0486 0.066 Uiso 1 1 calc R . .
H33C H 0.1364 0.2678 -0.0719 0.066 Uiso 1 1 calc R . .
C34 C -0.1494(3) 0.24173(19) 0.2561(2) 0.0433(7) Uani 1 1 d . . .
H34 H -0.1003 0.2891 0.2834 0.052 Uiso 1 1 calc R . .
C35 C -0.3044(4) 0.2501(4) 0.2551(3) 0.108(2) Uani 1 1 d . . .
H35A H -0.3544 0.2027 0.2331 0.163 Uiso 1 1 calc R . .
H35B H -0.3445 0.2931 0.2176 0.163 Uiso 1 1 calc R . .
H35C H -0.3148 0.2598 0.3140 0.163 Uiso 1 1 calc R . .
C36 C -0.0884(5) 0.1746(3) 0.3127(3) 0.0742(12) Uani 1 1 d . . .
H36A H -0.1375 0.1274 0.2891 0.111 Uiso 1 1 calc R . .
H36B H -0.1006 0.1830 0.3715 0.111 Uiso 1 1 calc R . .
H36C H 0.0124 0.1697 0.3143 0.111 Uiso 1 1 calc R . .
C37 C 0.1663(2) 0.48835(15) 0.35693(16) 0.0235(5) Uani 1 1 d . . .
C38 C 0.2746(2) 0.54144(15) 0.35604(17) 0.0269(6) Uani 1 1 d . . .
C39 C 0.3168(3) 0.58863(17) 0.4275(2) 0.0355(7) Uani 1 1 d . . .
H39 H 0.3917 0.6240 0.4293 0.043 Uiso 1 1 calc R . .
C40 C 0.2535(3) 0.58590(19) 0.4960(2) 0.0405(7) Uani 1 1 d . . .
H40 H 0.2834 0.6198 0.5437 0.049 Uiso 1 1 calc R . .
C41 C 0.1460(3) 0.53388(18) 0.49574(18) 0.0354(7) Uani 1 1 d . . .
H41 H 0.1030 0.5323 0.5435 0.043 Uiso 1 1 calc R . .
C42 C 0.1000(2) 0.48387(16) 0.42661(16) 0.0262(6) Uani 1 1 d . . .
C43 C 0.3443(3) 0.54841(17) 0.28027(18) 0.0306(6) Uani 1 1 d . . .
H43 H 0.2987 0.5105 0.2351 0.037 Uiso 1 1 calc R . .
C44 C 0.5017(3) 0.5296(2) 0.3076(2) 0.0510(9) Uani 1 1 d . . .
H44A H 0.5497 0.5681 0.3493 0.076 Uiso 1 1 calc R . .
H44B H 0.5420 0.5301 0.2567 0.076 Uiso 1 1 calc R . .
H44C H 0.5144 0.4787 0.3345 0.076 Uiso 1 1 calc R . .
C45 C 0.3220(4) 0.6287(2) 0.2403(2) 0.0528(9) Uani 1 1 d . . .
H45A H 0.2207 0.6403 0.2239 0.079 Uiso 1 1 calc R . .
H45B H 0.3609 0.6307 0.1889 0.079 Uiso 1 1 calc R . .
H45C H 0.3701 0.6667 0.2826 0.079 Uiso 1 1 calc R . .
C46 C -0.0149(2) 0.42639(18) 0.42956(17) 0.0320(6) Uani 1 1 d . . .
H46 H -0.0288 0.3944 0.3760 0.038 Uiso 1 1 calc R . .
C47 C 0.0275(3) 0.3725(2) 0.5063(3) 0.0545(10) Uani 1 1 d . . .
H47A H 0.1175 0.3477 0.5052 0.082 Uiso 1 1 calc R . .
H47B H -0.0455 0.3331 0.5031 0.082 Uiso 1 1 calc R . .
H47C H 0.0380 0.4017 0.5601 0.082 Uiso 1 1 calc R . .
C48 C -0.1546(3) 0.4641(2) 0.4288(3) 0.0625(11) Uani 1 1 d . . .
H48A H -0.1471 0.4927 0.4828 0.094 Uiso 1 1 calc R . .
H48B H -0.2279 0.4247 0.4236 0.094 Uiso 1 1 calc R . .
H48C H -0.1795 0.4994 0.3796 0.094 Uiso 1 1 calc R . .
 
loop_
 _atom_site_aniso_label
 _atom_site_aniso_U_11
 _atom_site_aniso_U_22
 _atom_site_aniso_U_33
 _atom_site_aniso_U_23
 _atom_site_aniso_U_13
 _atom_site_aniso_U_12
P1 0.0240(3) 0.0268(4) 0.0253(3) 0.0004(3) 0.0057(2) 0.0015(3)
P2 0.0267(3) 0.0229(4) 0.0250(3) 0.0021(3) 0.0051(2) -0.0004(3)
N1 0.0223(8) 0.0230(12) 0.0233(11) -0.0006(9) 0.0056(7) -0.0023(8)
N2 0.0264(9) 0.0226(11) 0.0240(11) 0.0018(9) 0.0032(7) -0.0007(8)
Cl1 0.0553(4) 0.0311(4) 0.0308(4) 0.0083(3) 0.0128(3) 0.0085(3)
Cl2 0.0320(3) 0.0437(5) 0.0482(4) -0.0013(4) 0.0157(3) 0.0085(3)
C1 0.0223(10) 0.0193(13) 0.0215(12) 0.0000(10) 0.0053(8) 0.0011(9)
C2 0.0241(10) 0.0257(14) 0.0240(13) 0.0048(11) 0.0080(9) 0.0036(10)
C3 0.0413(14) 0.0347(17) 0.0238(14) -0.0016(12) 0.0128(11) 0.0022(12)
C4 0.0442(15) 0.0328(17) 0.0299(16) -0.0071(13) 0.0050(12) -0.0012(13)
C5 0.0344(13) 0.0275(16) 0.0312(15) -0.0008(12) 0.0056(11) -0.0052(11)
C6 0.0249(11) 0.0219(14) 0.0224(13) 0.0011(10) 0.0059(9) 0.0023(9)
C7 0.0286(11) 0.0356(16) 0.0292(14) 0.0048(13) 0.0129(9) 0.0009(12)
C8 0.0469(18) 0.053(2) 0.073(3) 0.031(2) 0.0129(17) -0.0011(16)
C9 0.0350(15) 0.053(2) 0.114(3) 0.026(2) 0.0357(18) 0.0052(15)
C10 0.0319(12) 0.0260(15) 0.0292(14) -0.0003(11) 0.0120(10) -0.0069(11)
C11 0.0320(14) 0.059(2) 0.0450(18) -0.0042(16) 0.0161(12) -0.0058(14)
C12 0.081(2) 0.0283(18) 0.043(2) 0.0049(14) 0.0299(17) -0.0045(16)
C13 0.0348(13) 0.0258(14) 0.0317(15) 0.0008(11) -0.0039(11) -0.0036(11)
C14 0.0500(17) 0.0313(16) 0.0345(17) -0.0011(13) -0.0021(12) -0.0005(13)
C15 0.079(2) 0.046(2) 0.047(2) -0.0159(18) -0.0070(18) -0.0120(19)
C16 0.103(3) 0.042(2) 0.068(3) -0.005(2) -0.015(2) -0.031(2)
C17 0.071(2) 0.050(2) 0.067(3) 0.0098(19) -0.0050(19) -0.0320(19)
C18 0.0400(15) 0.0381(18) 0.050(2) 0.0102(15) 0.0002(13) -0.0133(13)
C19 0.0440(14) 0.0389(18) 0.0294(15) -0.0077(13) 0.0061(11) 0.0077(13)
C20 0.068(2) 0.078(3) 0.052(2) -0.019(2) 0.0113(18) 0.026(2)
C21 0.0501(18) 0.069(2) 0.0342(18) 0.0083(16) 0.0042(14) 0.0112(17)
C22 0.0416(16) 0.054(2) 0.050(2) 0.0184(17) 0.0089(14) -0.0160(15)
C23 0.073(3) 0.079(3) 0.071(3) 0.032(2) 0.010(2) 0.000(2)
C24 0.063(2) 0.108(4) 0.087(3) 0.022(3) 0.028(2) 0.005(2)
P3 0.0279(3) 0.0252(4) 0.0270(4) 0.0017(3) 0.0068(2) 0.0018(3)
P4 0.0250(3) 0.0280(4) 0.0266(4) 0.0011(3) 0.0058(2) 0.0034(3)
N3 0.0279(9) 0.0233(12) 0.0264(11) -0.0011(9) 0.0067(8) -0.0016(9)
N4 0.0225(8) 0.0230(12) 0.0218(10) 0.0001(9) 0.0061(7) -0.0002(8)
Cl3 0.0302(3) 0.0523(5) 0.0545(5) -0.0066(4) 0.0172(3) 0.0086(3)
Cl4 0.0588(4) 0.0310(4) 0.0326(4) 0.0089(3) 0.0123(3) 0.0080(3)
C25 0.0296(12) 0.0275(14) 0.0312(14) -0.0012(11) 0.0046(10) -0.0036(11)
C26 0.0350(13) 0.0322(16) 0.0308(15) -0.0028(12) 0.0061(11) -0.0012(12)
C27 0.064(2) 0.052(2) 0.0376(18) -0.0104(15) 0.0129(15) -0.0173(17)
C28 0.093(3) 0.059(2) 0.056(2) -0.024(2) 0.021(2) -0.041(2)
C29 0.071(2) 0.050(2) 0.058(2) -0.0032(18) 0.0190(18) -0.0320(19)
C30 0.0394(14) 0.0360(17) 0.0389(17) 0.0024(13) 0.0110(12) -0.0075(12)
C31 0.0404(13) 0.0342(16) 0.0286(14) 0.0016(12) 0.0129(11) 0.0001(12)
C32 0.0586(19) 0.048(2) 0.0385(19) 0.0056(15) 0.0117(14) 0.0094(16)
C33 0.0475(16) 0.0447(19) 0.0460(18) -0.0061(14) 0.0226(14) 0.0038(14)
C34 0.0451(16) 0.0396(18) 0.0497(19) 0.0064(15) 0.0202(14) -0.0082(13)
C35 0.067(3) 0.185(6) 0.086(3) 0.052(4) 0.044(2) 0.050(3)
C36 0.096(3) 0.077(3) 0.050(2) 0.021(2) 0.017(2) 0.021(2)
C37 0.0230(10) 0.0248(14) 0.0234(13) 0.0005(11) 0.0067(9) 0.0012(10)
C38 0.0283(11) 0.0240(15) 0.0297(14) 0.0044(11) 0.0091(10) 0.0012(10)
C39 0.0381(14) 0.0268(16) 0.0411(18) -0.0035(13) 0.0084(12) -0.0063(12)
C40 0.0512(17) 0.0391(19) 0.0300(17) -0.0143(14) 0.0072(13) -0.0008(14)
C41 0.0400(14) 0.0400(18) 0.0289(16) -0.0004(13) 0.0134(11) 0.0040(13)
C42 0.0260(11) 0.0284(15) 0.0246(14) 0.0020(11) 0.0068(9) 0.0046(10)
C43 0.0316(12) 0.0317(16) 0.0316(15) 0.0018(12) 0.0136(10) -0.0050(11)
C44 0.0341(14) 0.073(3) 0.050(2) -0.0036(18) 0.0179(13) -0.0127(15)
C45 0.079(2) 0.0358(19) 0.050(2) 0.0100(16) 0.0294(18) -0.0074(17)
C46 0.0313(12) 0.0373(16) 0.0308(14) 0.0036(13) 0.0145(10) 0.0000(12)
C47 0.0441(17) 0.049(2) 0.070(3) 0.0312(19) 0.0130(16) 0.0047(15)
C48 0.0341(15) 0.055(2) 0.104(3) 0.033(2) 0.0267(17) 0.0122(15)

#==============================================================================

# MOLECULAR GEOMETRY
 
_geom_special_details
;
 All s.u.'s (except the s.u. in the dihedral angle between two l.s. planes)
 are estimated using the full covariance matrix.  The cell s.u.'s are taken
 into account individually in the estimation of s.u.'s in distances, angles
 and torsion angles; correlations between s.u.'s in cell parameters are only
 used when they are defined by crystal symmetry.  An approximate (isotropic)
 treatment of cell s.u.'s is used for estimating s.u.'s involving l.s. planes.
;
 
loop_
 _geom_bond_atom_site_label_1
 _geom_bond_atom_site_label_2
 _geom_bond_distance
 _geom_bond_site_symmetry_2
 _geom_bond_publ_flag
P1 N2 1.707(2) . ?
P1 N1 1.707(2) . ?
P1 Cl1 2.0939(9) . ?
P1 P2 2.5724(9) . ?
P2 N2 1.705(2) . ?
P2 N1 1.709(2) . ?
P2 Cl2 2.0983(8) . ?
N1 C1 1.435(3) . ?
N2 C13 1.439(3) . ?
C1 C6 1.399(3) . ?
C1 C2 1.414(3) . ?
C2 C3 1.389(4) . ?
C2 C7 1.519(3) . ?
C3 C4 1.372(4) . ?
C3 H3 0.9500 . ?
C4 C5 1.379(4) . ?
C4 H4 0.9500 . ?
C5 C6 1.394(4) . ?
C5 H5 0.9500 . ?
C6 C10 1.518(3) . ?
C7 C8 1.504(4) . ?
C7 C9 1.525(4) . ?
C7 H7 1.0000 . ?
C8 H8A 0.9800 . ?
C8 H8B 0.9800 . ?
C8 H8C 0.9800 . ?
C9 H9A 0.9800 . ?
C9 H9B 0.9800 . ?
C9 H9C 0.9800 . ?
C10 C12 1.526(4) . ?
C10 C11 1.529(4) . ?
C10 H10 1.0000 . ?
C11 H11A 0.9800 . ?
C11 H11B 0.9800 . ?
C11 H11C 0.9800 . ?
C12 H12A 0.9800 . ?
C12 H12B 0.9800 . ?
C12 H12C 0.9800 . ?
C13 C14 1.399(4) . ?
C13 C18 1.415(4) . ?
C14 C15 1.396(4) . ?
C14 C19 1.505(4) . ?
C15 C16 1.370(6) . ?
C15 H15 0.9500 . ?
C16 C17 1.380(6) . ?
C16 H16 0.9500 . ?
C17 C18 1.394(5) . ?
C17 H17 0.9500 . ?
C18 C22 1.497(5) . ?
C19 C20 1.516(4) . ?
C19 C21 1.527(4) . ?
C19 H19 1.0000 . ?
C20 H20A 0.9800 . ?
C20 H20B 0.9800 . ?
C20 H20C 0.9800 . ?
C21 H21A 0.9800 . ?
C21 H21B 0.9800 . ?
C21 H21C 0.9800 . ?
C22 C24 1.530(5) . ?
C22 C23 1.536(5) . ?
C22 H22 1.0000 . ?
C23 H23A 0.9800 . ?
C23 H23B 0.9800 . ?
C23 H23C 0.9800 . ?
C24 H24A 0.9800 . ?
C24 H24B 0.9800 . ?
C24 H24C 0.9800 . ?
P3 N4 1.701(2) . ?
P3 N3 1.704(2) . ?
P3 Cl3 2.0987(8) . ?
P3 P4 2.5724(9) . ?
P4 N4 1.705(2) . ?
P4 N3 1.709(2) . ?
P4 Cl4 2.0972(10) . ?
N3 C25 1.443(3) . ?
N4 C37 1.436(3) . ?
C25 C30 1.406(4) . ?
C25 C26 1.407(4) . ?
C26 C27 1.389(4) . ?
C26 C31 1.516(4) . ?
C27 C28 1.372(5) . ?
C27 H27 0.9500 . ?
C28 C29 1.381(5) . ?
C28 H28 0.9500 . ?
C29 C30 1.408(4) . ?
C29 H29 0.9500 . ?
C30 C34 1.512(4) . ?
C31 C33 1.530(4) . ?
C31 C32 1.538(4) . ?
C31 H31 1.0000 . ?
C32 H32A 0.9800 . ?
C32 H32B 0.9800 . ?
C32 H32C 0.9800 . ?
C33 H33A 0.9800 . ?
C33 H33B 0.9800 . ?
C33 H33C 0.9800 . ?
C34 C36 1.510(5) . ?
C34 C35 1.513(5) . ?
C34 H34 1.0000 . ?
C35 H35A 0.9800 . ?
C35 H35B 0.9800 . ?
C35 H35C 0.9800 . ?
C36 H36A 0.9800 . ?
C36 H36B 0.9800 . ?
C36 H36C 0.9800 . ?
C37 C38 1.406(3) . ?
C37 C42 1.410(3) . ?
C38 C39 1.385(4) . ?
C38 C43 1.521(3) . ?
C39 C40 1.373(4) . ?
C39 H39 0.9500 . ?
C40 C41 1.383(4) . ?
C40 H40 0.9500 . ?
C41 C42 1.392(4) . ?
C41 H41 0.9500 . ?
C42 C46 1.511(4) . ?
C43 C44 1.527(4) . ?
C43 C45 1.531(4) . ?
C43 H43 1.0000 . ?
C44 H44A 0.9800 . ?
C44 H44B 0.9800 . ?
C44 H44C 0.9800 . ?
C45 H45A 0.9800 . ?
C45 H45B 0.9800 . ?
C45 H45C 0.9800 . ?
C46 C48 1.508(4) . ?
C46 C47 1.518(4) . ?
C46 H46 1.0000 . ?
C47 H47A 0.9800 . ?
C47 H47B 0.9800 . ?
C47 H47C 0.9800 . ?
C48 H48A 0.9800 . ?
C48 H48B 0.9800 . ?
C48 H48C 0.9800 . ?
 
loop_
 _geom_angle_atom_site_label_1
 _geom_angle_atom_site_label_2
 _geom_angle_atom_site_label_3
 _geom_angle
 _geom_angle_site_symmetry_1
 _geom_angle_site_symmetry_3
 _geom_angle_publ_flag
N2 P1 N1 81.39(10) . . ?
N2 P1 Cl1 106.06(8) . . ?
N1 P1 Cl1 103.29(7) . . ?
N2 P1 P2 41.04(7) . . ?
N1 P1 P2 41.16(8) . . ?
Cl1 P1 P2 115.83(3) . . ?
N2 P2 N1 81.38(11) . . ?
N2 P2 Cl2 103.67(7) . . ?
N1 P2 Cl2 105.63(7) . . ?
N2 P2 P1 41.08(8) . . ?
N1 P2 P1 41.10(7) . . ?
Cl2 P2 P1 115.79(4) . . ?
C1 N1 P1 128.35(16) . . ?
C1 N1 P2 128.52(17) . . ?
P1 N1 P2 97.74(11) . . ?
C13 N2 P2 127.86(18) . . ?
C13 N2 P1 129.29(16) . . ?
P2 N2 P1 97.88(11) . . ?
C6 C1 C2 121.7(2) . . ?
C6 C1 N1 118.7(2) . . ?
C2 C1 N1 119.6(2) . . ?
C3 C2 C1 117.8(2) . . ?
C3 C2 C7 119.8(2) . . ?
C1 C2 C7 122.3(2) . . ?
C4 C3 C2 121.0(2) . . ?
C4 C3 H3 119.5 . . ?
C2 C3 H3 119.5 . . ?
C3 C4 C5 120.8(3) . . ?
C3 C4 H4 119.6 . . ?
C5 C4 H4 119.6 . . ?
C4 C5 C6 120.9(3) . . ?
C4 C5 H5 119.5 . . ?
C6 C5 H5 119.5 . . ?
C5 C6 C1 117.8(2) . . ?
C5 C6 C10 119.2(2) . . ?
C1 C6 C10 123.0(2) . . ?
C8 C7 C2 112.0(2) . . ?
C8 C7 C9 110.5(3) . . ?
C2 C7 C9 112.4(3) . . ?
C8 C7 H7 107.2 . . ?
C2 C7 H7 107.2 . . ?
C9 C7 H7 107.2 . . ?
C7 C8 H8A 109.5 . . ?
C7 C8 H8B 109.5 . . ?
H8A C8 H8B 109.5 . . ?
C7 C8 H8C 109.5 . . ?
H8A C8 H8C 109.5 . . ?
H8B C8 H8C 109.5 . . ?
C7 C9 H9A 109.5 . . ?
C7 C9 H9B 109.5 . . ?
H9A C9 H9B 109.5 . . ?
C7 C9 H9C 109.5 . . ?
H9A C9 H9C 109.5 . . ?
H9B C9 H9C 109.5 . . ?
C6 C10 C12 111.0(2) . . ?
C6 C10 C11 112.0(2) . . ?
C12 C10 C11 110.9(2) . . ?
C6 C10 H10 107.6 . . ?
C12 C10 H10 107.6 . . ?
C11 C10 H10 107.6 . . ?
C10 C11 H11A 109.5 . . ?
C10 C11 H11B 109.5 . . ?
H11A C11 H11B 109.5 . . ?
C10 C11 H11C 109.5 . . ?
H11A C11 H11C 109.5 . . ?
H11B C11 H11C 109.5 . . ?
C10 C12 H12A 109.5 . . ?
C10 C12 H12B 109.5 . . ?
H12A C12 H12B 109.5 . . ?
C10 C12 H12C 109.5 . . ?
H12A C12 H12C 109.5 . . ?
H12B C12 H12C 109.5 . . ?
C14 C13 C18 122.8(3) . . ?
C14 C13 N2 118.2(2) . . ?
C18 C13 N2 119.0(3) . . ?
C15 C14 C13 116.9(3) . . ?
C15 C14 C19 119.9(3) . . ?
C13 C14 C19 123.2(3) . . ?
C16 C15 C14 121.3(4) . . ?
C16 C15 H15 119.4 . . ?
C14 C15 H15 119.4 . . ?
C15 C16 C17 121.3(3) . . ?
C15 C16 H16 119.3 . . ?
C17 C16 H16 119.3 . . ?
C16 C17 C18 120.4(3) . . ?
C16 C17 H17 119.8 . . ?
C18 C17 H17 119.8 . . ?
C17 C18 C13 117.3(3) . . ?
C17 C18 C22 118.6(3) . . ?
C13 C18 C22 124.1(3) . . ?
C14 C19 C20 112.2(3) . . ?
C14 C19 C21 111.2(2) . . ?
C20 C19 C21 110.4(3) . . ?
C14 C19 H19 107.6 . . ?
C20 C19 H19 107.6 . . ?
C21 C19 H19 107.6 . . ?
C19 C20 H20A 109.5 . . ?
C19 C20 H20B 109.5 . . ?
H20A C20 H20B 109.5 . . ?
C19 C20 H20C 109.5 . . ?
H20A C20 H20C 109.5 . . ?
H20B C20 H20C 109.5 . . ?
C19 C21 H21A 109.5 . . ?
C19 C21 H21B 109.5 . . ?
H21A C21 H21B 109.5 . . ?
C19 C21 H21C 109.5 . . ?
H21A C21 H21C 109.5 . . ?
H21B C21 H21C 109.5 . . ?
C18 C22 C24 112.2(3) . . ?
C18 C22 C23 112.1(3) . . ?
C24 C22 C23 111.4(3) . . ?
C18 C22 H22 106.9 . . ?
C24 C22 H22 106.9 . . ?
C23 C22 H22 106.9 . . ?
C22 C23 H23A 109.5 . . ?
C22 C23 H23B 109.5 . . ?
H23A C23 H23B 109.5 . . ?
C22 C23 H23C 109.5 . . ?
H23A C23 H23C 109.5 . . ?
H23B C23 H23C 109.5 . . ?
C22 C24 H24A 109.5 . . ?
C22 C24 H24B 109.5 . . ?
H24A C24 H24B 109.5 . . ?
C22 C24 H24C 109.5 . . ?
H24A C24 H24C 109.5 . . ?
H24B C24 H24C 109.5 . . ?
N4 P3 N3 81.52(11) . . ?
N4 P3 Cl3 105.81(7) . . ?
N3 P3 Cl3 103.60(7) . . ?
N4 P3 P4 41.01(7) . . ?
N3 P3 P4 41.17(8) . . ?
Cl3 P3 P4 115.28(4) . . ?
N4 P4 N3 81.25(10) . . ?
N4 P4 Cl4 102.68(8) . . ?
N3 P4 Cl4 106.63(8) . . ?
N4 P4 P3 40.89(8) . . ?
N3 P4 P3 41.01(7) . . ?
Cl4 P4 P3 115.13(3) . . ?
C25 N3 P3 127.09(18) . . ?
C25 N3 P4 131.80(16) . . ?
P3 N3 P4 97.81(11) . . ?
C37 N4 P3 129.76(17) . . ?
C37 N4 P4 127.82(16) . . ?
P3 N4 P4 98.10(11) . . ?
C30 C25 C26 122.2(3) . . ?
C30 C25 N3 119.3(2) . . ?
C26 C25 N3 118.4(2) . . ?
C27 C26 C25 118.3(3) . . ?
C27 C26 C31 118.8(3) . . ?
C25 C26 C31 122.9(2) . . ?
C28 C27 C26 120.9(3) . . ?
C28 C27 H27 119.5 . . ?
C26 C27 H27 119.5 . . ?
C27 C28 C29 120.4(3) . . ?
C27 C28 H28 119.8 . . ?
C29 C28 H28 119.8 . . ?
C28 C29 C30 121.7(3) . . ?
C28 C29 H29 119.2 . . ?
C30 C29 H29 119.2 . . ?
C25 C30 C29 116.4(3) . . ?
C25 C30 C34 123.5(3) . . ?
C29 C30 C34 120.1(3) . . ?
C26 C31 C33 112.4(3) . . ?
C26 C31 C32 110.2(2) . . ?
C33 C31 C32 110.8(2) . . ?
C26 C31 H31 107.8 . . ?
C33 C31 H31 107.8 . . ?
C32 C31 H31 107.8 . . ?
C31 C32 H32A 109.5 . . ?
C31 C32 H32B 109.5 . . ?
H32A C32 H32B 109.5 . . ?
C31 C32 H32C 109.5 . . ?
H32A C32 H32C 109.5 . . ?
H32B C32 H32C 109.5 . . ?
C31 C33 H33A 109.5 . . ?
C31 C33 H33B 109.5 . . ?
H33A C33 H33B 109.5 . . ?
C31 C33 H33C 109.5 . . ?
H33A C33 H33C 109.5 . . ?
H33B C33 H33C 109.5 . . ?
C36 C34 C30 112.4(3) . . ?
C36 C34 C35 109.4(3) . . ?
C30 C34 C35 112.4(3) . . ?
C36 C34 H34 107.5 . . ?
C30 C34 H34 107.5 . . ?
C35 C34 H34 107.5 . . ?
C34 C35 H35A 109.5 . . ?
C34 C35 H35B 109.5 . . ?
H35A C35 H35B 109.5 . . ?
C34 C35 H35C 109.5 . . ?
H35A C35 H35C 109.5 . . ?
H35B C35 H35C 109.5 . . ?
C34 C36 H36A 109.5 . . ?
C34 C36 H36B 109.5 . . ?
H36A C36 H36B 109.5 . . ?
C34 C36 H36C 109.5 . . ?
H36A C36 H36C 109.5 . . ?
H36B C36 H36C 109.5 . . ?
C38 C37 C42 121.9(2) . . ?
C38 C37 N4 118.7(2) . . ?
C42 C37 N4 119.4(2) . . ?
C39 C38 C37 117.4(2) . . ?
C39 C38 C43 120.1(2) . . ?
C37 C38 C43 122.5(2) . . ?
C40 C39 C38 122.0(3) . . ?
C40 C39 H39 119.0 . . ?
C38 C39 H39 119.0 . . ?
C39 C40 C41 120.0(3) . . ?
C39 C40 H40 120.0 . . ?
C41 C40 H40 120.0 . . ?
C40 C41 C42 121.0(3) . . ?
C40 C41 H41 119.5 . . ?
C42 C41 H41 119.5 . . ?
C41 C42 C37 117.7(2) . . ?
C41 C42 C46 119.6(2) . . ?
C37 C42 C46 122.7(2) . . ?
C38 C43 C44 111.2(2) . . ?
C38 C43 C45 110.8(2) . . ?
C44 C43 C45 110.4(3) . . ?
C38 C43 H43 108.1 . . ?
C44 C43 H43 108.1 . . ?
C45 C43 H43 108.1 . . ?
C43 C44 H44A 109.5 . . ?
C43 C44 H44B 109.5 . . ?
H44A C44 H44B 109.5 . . ?
C43 C44 H44C 109.5 . . ?
H44A C44 H44C 109.5 . . ?
H44B C44 H44C 109.5 . . ?
C43 C45 H45A 109.5 . . ?
C43 C45 H45B 109.5 . . ?
H45A C45 H45B 109.5 . . ?
C43 C45 H45C 109.5 . . ?
H45A C45 H45C 109.5 . . ?
H45B C45 H45C 109.5 . . ?
C48 C46 C42 112.6(3) . . ?
C48 C46 C47 110.5(2) . . ?
C42 C46 C47 111.8(2) . . ?
C48 C46 H46 107.2 . . ?
C42 C46 H46 107.2 . . ?
C47 C46 H46 107.2 . . ?
C46 C47 H47A 109.5 . . ?
C46 C47 H47B 109.5 . . ?
H47A C47 H47B 109.5 . . ?
C46 C47 H47C 109.5 . . ?
H47A C47 H47C 109.5 . . ?
H47B C47 H47C 109.5 . . ?
C46 C48 H48A 109.5 . . ?
C46 C48 H48B 109.5 . . ?
H48A C48 H48B 109.5 . . ?
C46 C48 H48C 109.5 . . ?
H48A C48 H48C 109.5 . . ?
H48B C48 H48C 109.5 . . ?
 
loop_
 _geom_torsion_atom_site_label_1
 _geom_torsion_atom_site_label_2
 _geom_torsion_atom_site_label_3
 _geom_torsion_atom_site_label_4
 _geom_torsion
 _geom_torsion_site_symmetry_1
 _geom_torsion_site_symmetry_2
 _geom_torsion_site_symmetry_3
 _geom_torsion_site_symmetry_4
 _geom_torsion_publ_flag
N1 P1 P2 N2 165.43(14) . . . . ?
Cl1 P1 P2 N2 84.96(11) . . . . ?
N2 P1 P2 N1 -165.43(14) . . . . ?
Cl1 P1 P2 N1 -80.47(10) . . . . ?
N2 P1 P2 Cl2 -81.10(11) . . . . ?
N1 P1 P2 Cl2 84.34(10) . . . . ?
Cl1 P1 P2 Cl2 3.87(6) . . . . ?
N2 P1 N1 C1 165.0(2) . . . . ?
Cl1 P1 N1 C1 -90.4(2) . . . . ?
P2 P1 N1 C1 155.4(2) . . . . ?
N2 P1 N1 P2 9.61(9) . . . . ?
Cl1 P1 N1 P2 114.20(8) . . . . ?
N2 P2 N1 C1 -164.94(19) . . . . ?
Cl2 P2 N1 C1 93.18(18) . . . . ?
P1 P2 N1 C1 -155.3(2) . . . . ?
N2 P2 N1 P1 -9.62(9) . . . . ?
Cl2 P2 N1 P1 -111.50(7) . . . . ?
N1 P2 N2 C13 166.1(2) . . . . ?
Cl2 P2 N2 C13 -89.8(2) . . . . ?
P1 P2 N2 C13 156.5(3) . . . . ?
N1 P2 N2 P1 9.63(9) . . . . ?
Cl2 P2 N2 P1 113.73(8) . . . . ?
N1 P1 N2 C13 -165.7(2) . . . . ?
Cl1 P1 N2 C13 92.9(2) . . . . ?
P2 P1 N2 C13 -156.0(3) . . . . ?
N1 P1 N2 P2 -9.64(9) . . . . ?
Cl1 P1 N2 P2 -111.08(8) . . . . ?
P1 N1 C1 C6 108.5(2) . . . . ?
P2 N1 C1 C6 -103.4(2) . . . . ?
P1 N1 C1 C2 -71.7(3) . . . . ?
P2 N1 C1 C2 76.4(3) . . . . ?
C6 C1 C2 C3 0.5(4) . . . . ?
N1 C1 C2 C3 -179.3(2) . . . . ?
C6 C1 C2 C7 178.1(2) . . . . ?
N1 C1 C2 C7 -1.6(4) . . . . ?
C1 C2 C3 C4 0.4(4) . . . . ?
C7 C2 C3 C4 -177.3(2) . . . . ?
C2 C3 C4 C5 -0.9(4) . . . . ?
C3 C4 C5 C6 0.5(4) . . . . ?
C4 C5 C6 C1 0.4(4) . . . . ?
C4 C5 C6 C10 -179.5(3) . . . . ?
C2 C1 C6 C5 -0.9(4) . . . . ?
N1 C1 C6 C5 178.9(2) . . . . ?
C2 C1 C6 C10 179.0(2) . . . . ?
N1 C1 C6 C10 -1.2(4) . . . . ?
C3 C2 C7 C8 67.0(3) . . . . ?
C1 C2 C7 C8 -110.6(3) . . . . ?
C3 C2 C7 C9 -58.2(4) . . . . ?
C1 C2 C7 C9 124.2(3) . . . . ?
C5 C6 C10 C12 62.6(3) . . . . ?
C1 C6 C10 C12 -117.3(3) . . . . ?
C5 C6 C10 C11 -62.0(3) . . . . ?
C1 C6 C10 C11 118.1(3) . . . . ?
P2 N2 C13 C14 114.8(3) . . . . ?
P1 N2 C13 C14 -95.8(3) . . . . ?
P2 N2 C13 C18 -65.6(3) . . . . ?
P1 N2 C13 C18 83.7(3) . . . . ?
C18 C13 C14 C15 -0.6(4) . . . . ?
N2 C13 C14 C15 179.0(3) . . . . ?
C18 C13 C14 C19 -179.7(3) . . . . ?
N2 C13 C14 C19 -0.2(4) . . . . ?
C13 C14 C15 C16 -0.3(5) . . . . ?
C19 C14 C15 C16 178.9(4) . . . . ?
C14 C15 C16 C17 0.6(7) . . . . ?
C15 C16 C17 C18 0.1(7) . . . . ?
C16 C17 C18 C13 -1.0(5) . . . . ?
C16 C17 C18 C22 178.8(4) . . . . ?
C14 C13 C18 C17 1.2(5) . . . . ?
N2 C13 C18 C17 -178.3(3) . . . . ?
C14 C13 C18 C22 -178.5(3) . . . . ?
N2 C13 C18 C22 1.9(4) . . . . ?
C15 C14 C19 C20 61.6(4) . . . . ?
C13 C14 C19 C20 -119.3(3) . . . . ?
C15 C14 C19 C21 -62.6(4) . . . . ?
C13 C14 C19 C21 116.5(3) . . . . ?
C17 C18 C22 C24 64.5(4) . . . . ?
C13 C18 C22 C24 -115.8(4) . . . . ?
C17 C18 C22 C23 -61.7(4) . . . . ?
C13 C18 C22 C23 118.0(3) . . . . ?
N3 P3 P4 N4 -166.83(14) . . . . ?
Cl3 P3 P4 N4 -85.17(10) . . . . ?
N4 P3 P4 N3 166.83(14) . . . . ?
Cl3 P3 P4 N3 81.66(11) . . . . ?
N4 P3 P4 Cl4 80.14(10) . . . . ?
N3 P3 P4 Cl4 -86.69(11) . . . . ?
Cl3 P3 P4 Cl4 -5.03(6) . . . . ?
N4 P3 N3 C25 -170.0(2) . . . . ?
Cl3 P3 N3 C25 85.7(2) . . . . ?
P4 P3 N3 C25 -161.3(2) . . . . ?
N4 P3 N3 P4 -8.69(9) . . . . ?
Cl3 P3 N3 P4 -113.01(8) . . . . ?
N4 P4 N3 C25 168.6(2) . . . . ?
Cl4 P4 N3 C25 -90.7(2) . . . . ?
P3 P4 N3 C25 159.9(3) . . . . ?
N4 P4 N3 P3 8.68(10) . . . . ?
Cl4 P4 N3 P3 109.39(8) . . . . ?
N3 P3 N4 C37 166.3(2) . . . . ?
Cl3 P3 N4 C37 -91.92(18) . . . . ?
P4 P3 N4 C37 157.5(2) . . . . ?
N3 P3 N4 P4 8.72(9) . . . . ?
Cl3 P3 N4 P4 110.54(7) . . . . ?
N3 P4 N4 C37 -166.9(2) . . . . ?
Cl4 P4 N4 C37 87.93(19) . . . . ?
P3 P4 N4 C37 -158.2(2) . . . . ?
N3 P4 N4 P3 -8.70(10) . . . . ?
Cl4 P4 N4 P3 -113.90(8) . . . . ?
P3 N3 C25 C30 67.6(3) . . . . ?
P4 N3 C25 C30 -87.2(3) . . . . ?
P3 N3 C25 C26 -110.7(3) . . . . ?
P4 N3 C25 C26 94.5(3) . . . . ?
C30 C25 C26 C27 -0.5(4) . . . . ?
N3 C25 C26 C27 177.7(3) . . . . ?
C30 C25 C26 C31 178.1(3) . . . . ?
N3 C25 C26 C31 -3.6(4) . . . . ?
C25 C26 C27 C28 -0.7(5) . . . . ?
C31 C26 C27 C28 -179.5(3) . . . . ?
C26 C27 C28 C29 1.6(6) . . . . ?
C27 C28 C29 C30 -1.1(7) . . . . ?
C26 C25 C30 C29 1.0(4) . . . . ?
N3 C25 C30 C29 -177.3(3) . . . . ?
C26 C25 C30 C34 -178.1(3) . . . . ?
N3 C25 C30 C34 3.7(4) . . . . ?
C28 C29 C30 C25 -0.1(5) . . . . ?
C28 C29 C30 C34 178.9(4) . . . . ?
C27 C26 C31 C33 -57.1(4) . . . . ?
C25 C26 C31 C33 124.2(3) . . . . ?
C27 C26 C31 C32 67.0(3) . . . . ?
C25 C26 C31 C32 -111.7(3) . . . . ?
C25 C30 C34 C36 -117.6(4) . . . . ?
C29 C30 C34 C36 63.4(4) . . . . ?
C25 C30 C34 C35 118.5(4) . . . . ?
C29 C30 C34 C35 -60.5(5) . . . . ?
P3 N4 C37 C38 101.2(3) . . . . ?
P4 N4 C37 C38 -107.4(2) . . . . ?
P3 N4 C37 C42 -78.9(3) . . . . ?
P4 N4 C37 C42 72.5(3) . . . . ?
C42 C37 C38 C39 1.4(4) . . . . ?
N4 C37 C38 C39 -178.7(2) . . . . ?
C42 C37 C38 C43 -178.3(2) . . . . ?
N4 C37 C38 C43 1.7(4) . . . . ?
C37 C38 C39 C40 -1.8(4) . . . . ?
C43 C38 C39 C40 177.8(3) . . . . ?
C38 C39 C40 C41 1.3(5) . . . . ?
C39 C40 C41 C42 -0.2(5) . . . . ?
C40 C41 C42 C37 -0.2(4) . . . . ?
C40 C41 C42 C46 178.4(3) . . . . ?
C38 C37 C42 C41 -0.4(4) . . . . ?
N4 C37 C42 C41 179.7(2) . . . . ?
C38 C37 C42 C46 -179.0(2) . . . . ?
N4 C37 C42 C46 1.1(4) . . . . ?
C39 C38 C43 C44 62.5(4) . . . . ?
C37 C38 C43 C44 -117.9(3) . . . . ?
C39 C38 C43 C45 -60.8(3) . . . . ?
C37 C38 C43 C45 118.9(3) . . . . ?
C41 C42 C46 C48 65.4(4) . . . . ?
C37 C42 C46 C48 -116.0(3) . . . . ?
C41 C42 C46 C47 -59.7(4) . . . . ?
C37 C42 C46 C47 118.8(3) . . . . ?
 
_diffrn_measured_fraction_theta_max    0.994
_diffrn_reflns_theta_full              30.00
_diffrn_measured_fraction_theta_full   0.994
_refine_diff_density_max    0.368
_refine_diff_density_min   -0.240
_refine_diff_density_rms    0.057

#=============================================================================
 
data_jn351_(TritylNPCl)2

_audit_author_name                'Mayer, P.; Villinger, A.' 
_audit_creation_method            SHELXL-97 

#==============================================================================

# CHEMICAL DATA

_chemical_name_systematic
;
1,3-dichloro-2,4-bis(triphenylmethyl)-cyclo-1,3-diphospha-2,4-diazane
;
_chemical_name_common             ?
_chemical_melting_point           ?
_chemical_formula_moiety          'C38 H30 Cl2 N2 P2'
_chemical_formula_sum
 'C38 H30 Cl2 N2 P2'
_chemical_formula_weight          647.48
 
loop_
 _atom_type_symbol
 _atom_type_description
 _atom_type_scat_dispersion_real
 _atom_type_scat_dispersion_imag
 _atom_type_scat_source
 'C'  'C'   0.0033   0.0016
 'International Tables Vol C Tables 4.2.6.8 and 6.1.1.4'
 'H'  'H'   0.0000   0.0000
 'International Tables Vol C Tables 4.2.6.8 and 6.1.1.4'
 'N'  'N'   0.0061   0.0033
 'International Tables Vol C Tables 4.2.6.8 and 6.1.1.4'
 'P'  'P'   0.1023   0.0942
 'International Tables Vol C Tables 4.2.6.8 and 6.1.1.4'
 'Cl'  'Cl'   0.1484   0.1585
 'International Tables Vol C Tables 4.2.6.8 and 6.1.1.4'
 
#==============================================================================

# CRYSTAL DATA
 
_symmetry_cell_setting            monoclinic
_symmetry_space_group_name_H-M    'P 21/c'
_symmetry_space_group_name_Hall   '-P 2ybc'
_symmetry_Int_Tables_number       14
 
loop_
 _symmetry_equiv_pos_as_xyz
 'x, y, z'
 '-x, y+1/2, -z+1/2'
 '-x, -y, -z'
 'x, -y-1/2, z-1/2'
 
_cell_length_a                    21.6043(3)
_cell_length_b                    8.79950(10)
_cell_length_c                    17.6203(3)
_cell_angle_alpha                 90.00
_cell_angle_beta                  104.8450(10)
_cell_angle_gamma                 90.00
_cell_volume                      3237.94(8)
_cell_formula_units_Z             4
_cell_measurement_temperature     200(2)
_cell_measurement_reflns_used     25702
_cell_measurement_theta_min       3.134
_cell_measurement_theta_max       27.485

loop_
 _exptl_crystal_face_index_h
 _exptl_crystal_face_index_k
 _exptl_crystal_face_index_l
 _exptl_crystal_face_perp_dist
0 0 1 0.002000
0 0 -1 0.020000
5 -4 -2 0.050000
0 1 0 0.050000
3 0 -1 0.070000
-3 0 1 0.070000
 
_exptl_crystal_description        platelet
_exptl_crystal_colour             colourless
_exptl_crystal_size_max           0.16
_exptl_crystal_size_mid           0.10
_exptl_crystal_size_min           0.02
_exptl_crystal_density_meas       ?
_exptl_crystal_density_diffrn     1.328
_exptl_crystal_density_method     'not measured'
_exptl_crystal_F_000              1344
_exptl_absorpt_coefficient_mu     0.330
_exptl_absorpt_correction_type    none
_exptl_absorpt_correction_T_min   ?
_exptl_absorpt_correction_T_max   ?
_exptl_absorpt_process_details    ?

#==============================================================================

# EXPERIMENTAL DATA
 
_exptl_special_details
;
 ?
;
 
_diffrn_ambient_temperature       200(2) 
_diffrn_source_type               'FR 591 generator'
_diffrn_source_power              2.250 
_diffrn_source_voltage            50.00 
_diffrn_source_current            45.00 
_diffrn_radiation_wavelength      0.71073
_diffrn_radiation_type            MoK\a
_diffrn_radiation_source          'rotating anode'
_diffrn_radiation_monochromator   graphite
_diffrn_radiation_collimation     0.25
_diffrn_measurement_device        '95mm CCD camera on \k-goniostat'
_diffrn_measurement_device_type   'Nonius KappaCCD'
_diffrn_measurement_method        'omega-scans'
_diffrn_detector_area_resol_mean    9
_kl_diffrn_measurement_scan_angle           'omega-scan'
_kl_diffrn_measurement_scan_step_degree     1.60
_kl_diffrn_measurement_scan_time_per_degree 30
_kl_diffrn_measurement_detector_distance    30
_diffrn_standards_number          ?
_diffrn_standards_interval_count  ?
_diffrn_standards_interval_time   ?
_diffrn_standards_decay_%         ?
_diffrn_reflns_number             37888
_diffrn_reflns_av_R_equivalents   0.1061
_diffrn_reflns_av_sigmaI/netI     0.0642
_diffrn_reflns_limit_h_min        -28
_diffrn_reflns_limit_h_max        27
_diffrn_reflns_limit_k_min        -11
_diffrn_reflns_limit_k_max        10
_diffrn_reflns_limit_l_min        -22
_diffrn_reflns_limit_l_max        22
_diffrn_reflns_theta_min          3.29
_diffrn_reflns_theta_max          27.47
_reflns_number_total              7385
_reflns_number_gt                 5374
_reflns_threshold_expression      >2\s(I)
 
_computing_data_collection 'Collect (Nonius BV, 1997-2000)'
_computing_cell_refinement 'HKL Scalepack (Otwinowski & Minor 1997)'
_computing_data_reduction 'HKL Denzo and Scalepack (Otwinowski & Minor 1997)'
_computing_structure_solution  
;   
A. Altomare, M. C. Burla, M. Camalli, G. L. Cascarano, C. Giacovazzo, A.
Guagliardi, A. G. G. Moliterni, G. Polidori, R. Spagna: SIR97: a new tool for
crystal structure determination and refinement; J. Appl. Crystallogr. 1999,
32, 115-119.
;
_computing_structure_refinement   'SHELXL-97 (Sheldrick, 1997)'
_computing_molecular_graphics     'ORTEP-3v2.01 (Farrugia, 1997)' 
_computing_publication_material   'SHELXL-97'

#==============================================================================

# REFINEMENT DATA 

_refine_special_details
;
 All H atoms were positioned geometrically and refined using a riding model, 
 with C---H = 0.98 (methyl groups), 0.99\%A (methylene groups), 
 1.00\%A (methine groups) or 0.95 \%A (aryl CH) and with <i>U</i>~iso~(H) = 
 1.5 times <i>U</i>~eq~(C) (methyl groups) or with <i>U</i>~iso~(H) = 1.2 times 
 <i>U</i>~eq~(C) (methylene  groups, aryl CH, methine groups). Torsion angles 
 of all methyl groups were allowed to refine.
 
 Refinement of F^2^ against ALL reflections.  The weighted R-factor wR and
 goodness of fit S are based on F^2^, conventional R-factors R are based
 on F, with F set to zero for negative F^2^. The threshold expression of
 F^2^ > 2\s(F^2^) is used only for calculating R-factors(gt) etc. and is
 not relevant to the choice of reflections for refinement.  R-factors based
 on F^2^ are statistically about twice as large as those based on F, and R-
 factors based on ALL data will be even larger.
;
 
_refine_ls_structure_factor_coef  Fsqd
_refine_ls_matrix_type            full
_refine_ls_weighting_scheme       calc
_refine_ls_weighting_details
 'calc w=1/[\s^2^(Fo^2^)+(0.0352P)^2^+2.2793P] where P=(Fo^2^+2Fc^2^)/3'
_atom_sites_solution_primary      direct
_atom_sites_solution_secondary    difmap
_atom_sites_solution_hydrogens    geom
_refine_ls_hydrogen_treatment     constr
_refine_ls_extinction_method      none
_refine_ls_extinction_coef        ?
_refine_ls_number_reflns          7385
_refine_ls_number_parameters      397
_refine_ls_number_restraints      0
_refine_ls_R_factor_all           0.0738
_refine_ls_R_factor_gt            0.0449
_refine_ls_wR_factor_ref          0.1163
_refine_ls_wR_factor_gt           0.1028
_refine_ls_goodness_of_fit_ref    1.019
_refine_ls_restrained_S_all       1.019
_refine_ls_shift/su_max           0.001
_refine_ls_shift/su_mean          0.000

#==============================================================================

# ATOMIC COORDINATES AND DISPLACEMENT PARAMETERS
 
loop_
 _atom_site_label
 _atom_site_type_symbol
 _atom_site_fract_x
 _atom_site_fract_y
 _atom_site_fract_z
 _atom_site_U_iso_or_equiv
 _atom_site_adp_type
 _atom_site_occupancy
 _atom_site_symmetry_multiplicity
 _atom_site_calc_flag
 _atom_site_refinement_flags
 _atom_site_disorder_assembly
 _atom_site_disorder_group
P1 P 0.77269(3) 0.08725(7) 0.39960(3) 0.02694(14) Uani 1 1 d . . .
P2 P 0.72898(2) 0.16664(6) 0.51646(3) 0.02374(13) Uani 1 1 d . . .
N1 N 0.79922(8) 0.1701(2) 0.49045(10) 0.0245(4) Uani 1 1 d . . .
N2 N 0.70604(8) 0.0589(2) 0.43383(10) 0.0240(4) Uani 1 1 d . . .
Cl1 Cl 0.81780(3) -0.12801(7) 0.40912(4) 0.04102(16) Uani 1 1 d . . .
Cl2 Cl 0.74355(3) -0.00065(7) 0.60850(3) 0.03313(14) Uani 1 1 d . . .
C1 C 0.85551(10) 0.2760(2) 0.51452(12) 0.0253(4) Uani 1 1 d . . .
C2 C 0.86440(10) 0.3451(2) 0.43776(13) 0.0290(5) Uani 1 1 d . . .
C3 C 0.81484(12) 0.4326(3) 0.39149(14) 0.0366(5) Uani 1 1 d . . .
H3 H 0.7778 0.4529 0.4096 0.044 Uiso 1 1 calc R . .
C4 C 0.81883(13) 0.4901(3) 0.31995(15) 0.0436(6) Uani 1 1 d . . .
H4 H 0.7848 0.5497 0.2894 0.052 Uiso 1 1 calc R . .
C5 C 0.87216(15) 0.4607(3) 0.29298(16) 0.0480(7) Uani 1 1 d . . .
H5 H 0.8752 0.5009 0.2440 0.058 Uiso 1 1 calc R . .
C6 C 0.92046(15) 0.3742(3) 0.33657(18) 0.0519(7) Uani 1 1 d . . .
H6 H 0.9570 0.3535 0.3176 0.062 Uiso 1 1 calc R . .
C7 C 0.91702(12) 0.3152(3) 0.40929(15) 0.0404(6) Uani 1 1 d . . .
H7 H 0.9510 0.2543 0.4390 0.049 Uiso 1 1 calc R . .
C8 C 0.84151(10) 0.3968(2) 0.57168(12) 0.0264(5) Uani 1 1 d . . .
C9 C 0.82849(11) 0.3467(3) 0.64118(13) 0.0319(5) Uani 1 1 d . . .
H9 H 0.8267 0.2408 0.6507 0.038 Uiso 1 1 calc R . .
C10 C 0.81825(11) 0.4484(3) 0.69638(14) 0.0380(6) Uani 1 1 d . . .
H10 H 0.8086 0.4121 0.7428 0.046 Uiso 1 1 calc R . .
C11 C 0.82195(12) 0.6024(3) 0.68423(15) 0.0412(6) Uani 1 1 d . . .
H11 H 0.8145 0.6727 0.7219 0.049 Uiso 1 1 calc R . .
C12 C 0.83655(12) 0.6536(3) 0.61699(16) 0.0424(6) Uani 1 1 d . . .
H12 H 0.8400 0.7596 0.6089 0.051 Uiso 1 1 calc R . .
C13 C 0.84633(11) 0.5516(3) 0.56066(15) 0.0348(5) Uani 1 1 d . . .
H13 H 0.8563 0.5884 0.5145 0.042 Uiso 1 1 calc R . .
C14 C 0.91465(10) 0.1895(3) 0.56191(13) 0.0294(5) Uani 1 1 d . . .
C15 C 0.97121(11) 0.2694(3) 0.59254(17) 0.0470(7) Uani 1 1 d . . .
H15 H 0.9736 0.3744 0.5811 0.056 Uiso 1 1 calc R . .
C16 C 1.02420(13) 0.1958(4) 0.6399(2) 0.0619(9) Uani 1 1 d . . .
H16 H 1.0629 0.2505 0.6599 0.074 Uiso 1 1 calc R . .
C17 C 1.02100(13) 0.0444(4) 0.6579(2) 0.0624(9) Uani 1 1 d . . .
H17 H 1.0571 -0.0050 0.6909 0.075 Uiso 1 1 calc R . .
C18 C 0.96567(12) -0.0345(3) 0.62821(18) 0.0511(7) Uani 1 1 d . . .
H18 H 0.9633 -0.1391 0.6406 0.061 Uiso 1 1 calc R . .
C19 C 0.91268(11) 0.0378(3) 0.57985(15) 0.0375(6) Uani 1 1 d . . .
H19 H 0.8746 -0.0185 0.5590 0.045 Uiso 1 1 calc R . .
C20 C 0.64261(9) 0.0025(2) 0.38576(12) 0.0248(4) Uani 1 1 d . . .
C21 C 0.64440(10) 0.0319(3) 0.30028(12) 0.0275(5) Uani 1 1 d . . .
C22 C 0.64350(11) 0.1816(3) 0.27376(14) 0.0356(5) Uani 1 1 d . . .
H22 H 0.6401 0.2628 0.3080 0.043 Uiso 1 1 calc R . .
C23 C 0.64743(12) 0.2130(3) 0.19830(15) 0.0442(6) Uani 1 1 d . . .
H23 H 0.6465 0.3153 0.1808 0.053 Uiso 1 1 calc R . .
C24 C 0.65263(12) 0.0960(3) 0.14851(15) 0.0464(7) Uani 1 1 d . . .
H24 H 0.6536 0.1174 0.0960 0.056 Uiso 1 1 calc R . .
C25 C 0.65639(12) -0.0516(3) 0.17441(14) 0.0421(6) Uani 1 1 d . . .
H25 H 0.6617 -0.1317 0.1405 0.051 Uiso 1 1 calc R . .
C26 C 0.65248(10) -0.0838(3) 0.25046(13) 0.0323(5) Uani 1 1 d . . .
H26 H 0.6554 -0.1861 0.2683 0.039 Uiso 1 1 calc R . .
C27 C 0.58737(10) 0.0877(2) 0.40837(13) 0.0264(5) Uani 1 1 d . . .
C28 C 0.58576(10) 0.0953(3) 0.48637(13) 0.0298(5) Uani 1 1 d . . .
H28 H 0.6189 0.0487 0.5254 0.036 Uiso 1 1 calc R . .
C29 C 0.53648(11) 0.1698(3) 0.50830(14) 0.0361(5) Uani 1 1 d . . .
H29 H 0.5372 0.1773 0.5623 0.043 Uiso 1 1 calc R . .
C30 C 0.48673(11) 0.2328(3) 0.45261(16) 0.0416(6) Uani 1 1 d . . .
H30 H 0.4532 0.2849 0.4677 0.050 Uiso 1 1 calc R . .
C31 C 0.48617(12) 0.2193(3) 0.37454(16) 0.0455(6) Uani 1 1 d . . .
H31 H 0.4513 0.2595 0.3354 0.055 Uiso 1 1 calc R . .
C32 C 0.53612(11) 0.1475(3) 0.35231(14) 0.0374(6) Uani 1 1 d . . .
H32 H 0.5351 0.1395 0.2982 0.045 Uiso 1 1 calc R . .
C33 C 0.63322(10) -0.1672(2) 0.40121(12) 0.0253(4) Uani 1 1 d . . .
C34 C 0.67903(11) -0.2543(3) 0.45244(13) 0.0290(5) Uani 1 1 d . . .
H34 H 0.7186 -0.2094 0.4793 0.035 Uiso 1 1 calc R . .
C35 C 0.66761(11) -0.4066(3) 0.46494(14) 0.0340(5) Uani 1 1 d . . .
H35 H 0.6993 -0.4648 0.5004 0.041 Uiso 1 1 calc R . .
C36 C 0.61071(13) -0.4738(3) 0.42634(15) 0.0394(6) Uani 1 1 d . . .
H36 H 0.6033 -0.5782 0.4347 0.047 Uiso 1 1 calc R . .
C37 C 0.56420(12) -0.3883(3) 0.37518(15) 0.0381(6) Uani 1 1 d . . .
H37 H 0.5247 -0.4339 0.3486 0.046 Uiso 1 1 calc R . .
C38 C 0.57534(11) -0.2361(3) 0.36285(13) 0.0321(5) Uani 1 1 d . . .
H38 H 0.5433 -0.1779 0.3279 0.039 Uiso 1 1 calc R . .
 
loop_
 _atom_site_aniso_label
 _atom_site_aniso_U_11
 _atom_site_aniso_U_22
 _atom_site_aniso_U_33
 _atom_site_aniso_U_23
 _atom_site_aniso_U_13
 _atom_site_aniso_U_12
P1 0.0276(3) 0.0316(3) 0.0232(3) -0.0030(2) 0.0092(2) -0.0027(2)
P2 0.0238(3) 0.0252(3) 0.0226(3) -0.0020(2) 0.0066(2) 0.0003(2)
N1 0.0239(9) 0.0279(9) 0.0219(9) -0.0021(7) 0.0062(7) -0.0014(7)
N2 0.0230(8) 0.0272(9) 0.0219(9) -0.0014(7) 0.0060(7) -0.0021(7)
Cl1 0.0417(3) 0.0374(3) 0.0477(4) -0.0076(3) 0.0184(3) 0.0062(3)
Cl2 0.0373(3) 0.0370(3) 0.0247(3) 0.0041(2) 0.0072(2) -0.0009(2)
C1 0.0239(10) 0.0260(11) 0.0262(11) -0.0008(9) 0.0067(8) -0.0032(9)
C2 0.0330(11) 0.0257(11) 0.0291(11) -0.0037(9) 0.0094(9) -0.0070(9)
C3 0.0377(13) 0.0384(14) 0.0335(13) 0.0037(10) 0.0090(10) -0.0025(11)
C4 0.0566(16) 0.0391(14) 0.0327(13) 0.0043(11) 0.0072(12) -0.0056(12)
C5 0.0756(19) 0.0422(15) 0.0313(13) -0.0012(11) 0.0230(13) -0.0136(14)
C6 0.0648(19) 0.0494(17) 0.0548(17) -0.0056(14) 0.0395(15) -0.0061(14)
C7 0.0454(14) 0.0386(14) 0.0426(14) -0.0019(11) 0.0209(12) -0.0010(11)
C8 0.0224(10) 0.0272(11) 0.0279(11) -0.0026(9) 0.0031(8) -0.0006(9)
C9 0.0326(12) 0.0322(12) 0.0291(12) -0.0021(9) 0.0045(9) -0.0026(10)
C10 0.0398(13) 0.0478(15) 0.0268(12) -0.0080(11) 0.0093(10) -0.0059(11)
C11 0.0400(13) 0.0420(15) 0.0408(14) -0.0162(12) 0.0088(11) 0.0013(11)
C12 0.0443(14) 0.0300(13) 0.0513(16) -0.0056(11) 0.0093(12) 0.0022(11)
C13 0.0368(12) 0.0313(12) 0.0364(13) 0.0016(10) 0.0096(10) -0.0001(10)
C14 0.0230(10) 0.0330(12) 0.0319(12) -0.0049(9) 0.0065(9) 0.0010(9)
C15 0.0291(12) 0.0370(14) 0.0686(19) -0.0086(13) 0.0013(12) -0.0010(11)
C16 0.0269(13) 0.0555(19) 0.089(2) -0.0162(17) -0.0104(14) 0.0027(13)
C17 0.0363(14) 0.059(2) 0.077(2) -0.0044(16) -0.0131(14) 0.0177(14)
C18 0.0368(14) 0.0426(16) 0.0677(19) 0.0066(14) 0.0021(13) 0.0086(12)
C19 0.0287(12) 0.0381(14) 0.0425(14) 0.0021(11) 0.0031(10) 0.0028(10)
C20 0.0232(10) 0.0269(11) 0.0230(10) 0.0000(8) 0.0039(8) -0.0017(9)
C21 0.0251(10) 0.0331(12) 0.0232(10) 0.0007(9) 0.0042(8) -0.0058(9)
C22 0.0396(13) 0.0358(13) 0.0293(12) 0.0035(10) 0.0049(10) -0.0049(11)
C23 0.0473(15) 0.0502(16) 0.0338(13) 0.0151(12) 0.0078(11) -0.0057(12)
C24 0.0432(14) 0.072(2) 0.0247(12) 0.0084(13) 0.0096(10) -0.0137(14)
C25 0.0398(13) 0.0606(17) 0.0283(12) -0.0079(12) 0.0130(10) -0.0124(13)
C26 0.0299(11) 0.0394(13) 0.0283(11) -0.0034(10) 0.0086(9) -0.0088(10)
C27 0.0244(10) 0.0242(11) 0.0300(11) 0.0011(9) 0.0059(8) -0.0030(9)
C28 0.0252(10) 0.0342(12) 0.0305(12) 0.0013(9) 0.0078(9) -0.0053(9)
C29 0.0305(12) 0.0447(14) 0.0362(13) -0.0051(11) 0.0141(10) -0.0050(10)
C30 0.0306(12) 0.0437(15) 0.0531(16) -0.0026(12) 0.0156(11) 0.0053(11)
C31 0.0341(13) 0.0528(17) 0.0467(15) 0.0076(13) 0.0048(11) 0.0141(12)
C32 0.0341(12) 0.0451(15) 0.0307(12) 0.0010(11) 0.0043(10) 0.0051(11)
C33 0.0290(11) 0.0273(11) 0.0218(10) -0.0009(8) 0.0105(8) -0.0021(9)
C34 0.0321(11) 0.0279(12) 0.0281(11) 0.0007(9) 0.0098(9) 0.0004(9)
C35 0.0396(13) 0.0312(13) 0.0340(13) 0.0048(10) 0.0144(10) 0.0032(10)
C36 0.0545(15) 0.0249(12) 0.0433(14) -0.0008(10) 0.0208(12) -0.0051(11)
C37 0.0414(14) 0.0363(13) 0.0373(13) -0.0033(11) 0.0114(11) -0.0143(11)
C38 0.0347(12) 0.0322(12) 0.0288(11) 0.0011(9) 0.0070(9) -0.0044(10)

#==============================================================================

# MOLECULAR GEOMETRY
 
_geom_special_details
;
 All s.u.'s (except the s.u. in the dihedral angle between two l.s. planes)
 are estimated using the full covariance matrix.  The cell s.u.'s are taken
 into account individually in the estimation of s.u.'s in distances, angles
 and torsion angles; correlations between s.u.'s in cell parameters are only
 used when they are defined by crystal symmetry.  An approximate (isotropic)
 treatment of cell s.u.'s is used for estimating s.u.'s involving l.s. planes.
;
 
loop_
 _geom_bond_atom_site_label_1
 _geom_bond_atom_site_label_2
 _geom_bond_distance
 _geom_bond_site_symmetry_2
 _geom_bond_publ_flag
P1 N2 1.7157(17) . ?
P1 N1 1.7183(17) . ?
P1 Cl1 2.1172(8) . ?
P1 P2 2.5721(8) . ?
P2 N1 1.6942(18) . ?
P2 N2 1.7012(18) . ?
P2 Cl2 2.1529(8) . ?
N1 C1 1.504(3) . ?
N2 C20 1.499(2) . ?
C1 C14 1.537(3) . ?
C1 C2 1.539(3) . ?
C1 C8 1.547(3) . ?
C2 C7 1.380(3) . ?
C2 C3 1.399(3) . ?
C3 C4 1.381(3) . ?
C3 H3 0.9500 . ?
C4 C5 1.379(4) . ?
C4 H4 0.9500 . ?
C5 C6 1.359(4) . ?
C5 H5 0.9500 . ?
C6 C7 1.402(4) . ?
C6 H6 0.9500 . ?
C7 H7 0.9500 . ?
C8 C13 1.383(3) . ?
C8 C9 1.396(3) . ?
C9 C10 1.381(3) . ?
C9 H9 0.9500 . ?
C10 C11 1.377(4) . ?
C10 H10 0.9500 . ?
C11 C12 1.377(4) . ?
C11 H11 0.9500 . ?
C12 C13 1.394(4) . ?
C12 H12 0.9500 . ?
C13 H13 0.9500 . ?
C14 C19 1.375(3) . ?
C14 C15 1.393(3) . ?
C15 C16 1.391(4) . ?
C15 H15 0.9500 . ?
C16 C17 1.376(5) . ?
C16 H16 0.9500 . ?
C17 C18 1.365(4) . ?
C17 H17 0.9500 . ?
C18 C19 1.394(3) . ?
C18 H18 0.9500 . ?
C19 H19 0.9500 . ?
C20 C21 1.539(3) . ?
C20 C33 1.541(3) . ?
C20 C27 1.546(3) . ?
C21 C26 1.384(3) . ?
C21 C22 1.396(3) . ?
C22 C23 1.382(3) . ?
C22 H22 0.9500 . ?
C23 C24 1.376(4) . ?
C23 H23 0.9500 . ?
C24 C25 1.372(4) . ?
C24 H24 0.9500 . ?
C25 C26 1.393(3) . ?
C25 H25 0.9500 . ?
C26 H26 0.9500 . ?
C27 C32 1.385(3) . ?
C27 C28 1.385(3) . ?
C28 C29 1.387(3) . ?
C28 H28 0.9500 . ?
C29 C30 1.373(3) . ?
C29 H29 0.9500 . ?
C30 C31 1.378(4) . ?
C30 H30 0.9500 . ?
C31 C32 1.390(4) . ?
C31 H31 0.9500 . ?
C32 H32 0.9500 . ?
C33 C34 1.387(3) . ?
C33 C38 1.398(3) . ?
C34 C35 1.391(3) . ?
C34 H34 0.9500 . ?
C35 C36 1.377(3) . ?
C35 H35 0.9500 . ?
C36 C37 1.387(4) . ?
C36 H36 0.9500 . ?
C37 C38 1.388(3) . ?
C37 H37 0.9500 . ?
C38 H38 0.9500 . ?
 
loop_
 _geom_angle_atom_site_label_1
 _geom_angle_atom_site_label_2
 _geom_angle_atom_site_label_3
 _geom_angle
 _geom_angle_site_symmetry_1
 _geom_angle_site_symmetry_3
 _geom_angle_publ_flag
N2 P1 N1 81.02(8) . . ?
N2 P1 Cl1 104.65(7) . . ?
N1 P1 Cl1 105.60(7) . . ?
N2 P1 P2 40.96(6) . . ?
N1 P1 P2 40.74(6) . . ?
Cl1 P1 P2 115.82(3) . . ?
N1 P2 N2 82.14(8) . . ?
N1 P2 Cl2 104.36(7) . . ?
N2 P2 Cl2 102.59(7) . . ?
N1 P2 P1 41.44(6) . . ?
N2 P2 P1 41.39(6) . . ?
Cl2 P2 P1 113.86(3) . . ?
C1 N1 P2 130.58(14) . . ?
C1 N1 P1 125.33(14) . . ?
P2 N1 P1 97.82(9) . . ?
C20 N2 P2 133.77(14) . . ?
C20 N2 P1 125.27(13) . . ?
P2 N2 P1 97.66(9) . . ?
N1 C1 C14 110.25(17) . . ?
N1 C1 C2 105.72(16) . . ?
C14 C1 C2 113.55(18) . . ?
N1 C1 C8 109.29(16) . . ?
C14 C1 C8 105.11(16) . . ?
C2 C1 C8 112.93(18) . . ?
C7 C2 C3 118.2(2) . . ?
C7 C2 C1 122.9(2) . . ?
C3 C2 C1 118.7(2) . . ?
C4 C3 C2 121.1(2) . . ?
C4 C3 H3 119.5 . . ?
C2 C3 H3 119.5 . . ?
C5 C4 C3 120.0(3) . . ?
C5 C4 H4 120.0 . . ?
C3 C4 H4 120.0 . . ?
C6 C5 C4 119.9(2) . . ?
C6 C5 H5 120.1 . . ?
C4 C5 H5 120.1 . . ?
C5 C6 C7 120.7(3) . . ?
C5 C6 H6 119.6 . . ?
C7 C6 H6 119.6 . . ?
C2 C7 C6 120.2(3) . . ?
C2 C7 H7 119.9 . . ?
C6 C7 H7 119.9 . . ?
C13 C8 C9 118.2(2) . . ?
C13 C8 C1 123.4(2) . . ?
C9 C8 C1 118.12(19) . . ?
C10 C9 C8 121.2(2) . . ?
C10 C9 H9 119.4 . . ?
C8 C9 H9 119.4 . . ?
C11 C10 C9 120.1(2) . . ?
C11 C10 H10 119.9 . . ?
C9 C10 H10 119.9 . . ?
C12 C11 C10 119.4(2) . . ?
C12 C11 H11 120.3 . . ?
C10 C11 H11 120.3 . . ?
C11 C12 C13 120.8(2) . . ?
C11 C12 H12 119.6 . . ?
C13 C12 H12 119.6 . . ?
C8 C13 C12 120.2(2) . . ?
C8 C13 H13 119.9 . . ?
C12 C13 H13 119.9 . . ?
C19 C14 C15 118.5(2) . . ?
C19 C14 C1 122.36(19) . . ?
C15 C14 C1 119.0(2) . . ?
C16 C15 C14 120.2(3) . . ?
C16 C15 H15 119.9 . . ?
C14 C15 H15 119.9 . . ?
C17 C16 C15 120.4(3) . . ?
C17 C16 H16 119.8 . . ?
C15 C16 H16 119.8 . . ?
C18 C17 C16 119.7(3) . . ?
C18 C17 H17 120.2 . . ?
C16 C17 H17 120.2 . . ?
C17 C18 C19 120.2(3) . . ?
C17 C18 H18 119.9 . . ?
C19 C18 H18 119.9 . . ?
C14 C19 C18 121.0(2) . . ?
C14 C19 H19 119.5 . . ?
C18 C19 H19 119.5 . . ?
N2 C20 C21 104.41(16) . . ?
N2 C20 C33 111.35(16) . . ?
C21 C20 C33 111.93(17) . . ?
N2 C20 C27 110.37(16) . . ?
C21 C20 C27 112.68(17) . . ?
C33 C20 C27 106.22(16) . . ?
C26 C21 C22 118.4(2) . . ?
C26 C21 C20 122.4(2) . . ?
C22 C21 C20 119.0(2) . . ?
C23 C22 C21 120.8(2) . . ?
C23 C22 H22 119.6 . . ?
C21 C22 H22 119.6 . . ?
C24 C23 C22 119.9(3) . . ?
C24 C23 H23 120.0 . . ?
C22 C23 H23 120.0 . . ?
C25 C24 C23 120.3(2) . . ?
C25 C24 H24 119.9 . . ?
C23 C24 H24 119.9 . . ?
C24 C25 C26 120.0(3) . . ?
C24 C25 H25 120.0 . . ?
C26 C25 H25 120.0 . . ?
C21 C26 C25 120.6(2) . . ?
C21 C26 H26 119.7 . . ?
C25 C26 H26 119.7 . . ?
C32 C27 C28 118.1(2) . . ?
C32 C27 C20 122.0(2) . . ?
C28 C27 C20 119.76(19) . . ?
C27 C28 C29 121.0(2) . . ?
C27 C28 H28 119.5 . . ?
C29 C28 H28 119.5 . . ?
C30 C29 C28 120.5(2) . . ?
C30 C29 H29 119.7 . . ?
C28 C29 H29 119.7 . . ?
C29 C30 C31 118.9(2) . . ?
C29 C30 H30 120.5 . . ?
C31 C30 H30 120.5 . . ?
C30 C31 C32 120.8(2) . . ?
C30 C31 H31 119.6 . . ?
C32 C31 H31 119.6 . . ?
C27 C32 C31 120.5(2) . . ?
C27 C32 H32 119.7 . . ?
C31 C32 H32 119.7 . . ?
C34 C33 C38 118.4(2) . . ?
C34 C33 C20 123.09(19) . . ?
C38 C33 C20 118.46(19) . . ?
C33 C34 C35 120.6(2) . . ?
C33 C34 H34 119.7 . . ?
C35 C34 H34 119.7 . . ?
C36 C35 C34 120.5(2) . . ?
C36 C35 H35 119.7 . . ?
C34 C35 H35 119.7 . . ?
C35 C36 C37 119.6(2) . . ?
C35 C36 H36 120.2 . . ?
C37 C36 H36 120.2 . . ?
C36 C37 C38 120.0(2) . . ?
C36 C37 H37 120.0 . . ?
C38 C37 H37 120.0 . . ?
C37 C38 C33 120.8(2) . . ?
C37 C38 H38 119.6 . . ?
C33 C38 H38 119.6 . . ?
 
loop_
 _geom_torsion_atom_site_label_1
 _geom_torsion_atom_site_label_2
 _geom_torsion_atom_site_label_3
 _geom_torsion_atom_site_label_4
 _geom_torsion
 _geom_torsion_site_symmetry_1
 _geom_torsion_site_symmetry_2
 _geom_torsion_site_symmetry_3
 _geom_torsion_site_symmetry_4
 _geom_torsion_publ_flag
N2 P1 P2 N1 166.63(13) . . . . ?
Cl1 P1 P2 N1 84.03(10) . . . . ?
N1 P1 P2 N2 -166.63(13) . . . . ?
Cl1 P1 P2 N2 -82.59(10) . . . . ?
N2 P1 P2 Cl2 81.87(9) . . . . ?
N1 P1 P2 Cl2 -84.76(10) . . . . ?
Cl1 P1 P2 Cl2 -0.72(5) . . . . ?
N2 P2 N1 C1 161.28(19) . . . . ?
Cl2 P2 N1 C1 -97.66(17) . . . . ?
P1 P2 N1 C1 152.4(2) . . . . ?
N2 P2 N1 P1 8.88(9) . . . . ?
Cl2 P2 N1 P1 109.94(7) . . . . ?
N2 P1 N1 C1 -163.28(18) . . . . ?
Cl1 P1 N1 C1 93.92(16) . . . . ?
P2 P1 N1 C1 -154.4(2) . . . . ?
N2 P1 N1 P2 -8.83(9) . . . . ?
Cl1 P1 N1 P2 -111.64(7) . . . . ?
N1 P2 N2 C20 -168.2(2) . . . . ?
Cl2 P2 N2 C20 88.73(19) . . . . ?
P1 P2 N2 C20 -159.3(2) . . . . ?
N1 P2 N2 P1 -8.89(9) . . . . ?
Cl2 P2 N2 P1 -111.93(7) . . . . ?
N1 P1 N2 C20 170.61(18) . . . . ?
Cl1 P1 N2 C20 -85.49(16) . . . . ?
P2 P1 N2 C20 161.8(2) . . . . ?
N1 P1 N2 P2 8.79(9) . . . . ?
Cl1 P1 N2 P2 112.69(7) . . . . ?
P2 N1 C1 C14 114.59(19) . . . . ?
P1 N1 C1 C14 -99.65(19) . . . . ?
P2 N1 C1 C2 -122.30(18) . . . . ?
P1 N1 C1 C2 23.5(2) . . . . ?
P2 N1 C1 C8 -0.5(3) . . . . ?
P1 N1 C1 C8 145.30(15) . . . . ?
N1 C1 C2 C7 -112.8(2) . . . . ?
C14 C1 C2 C7 8.2(3) . . . . ?
C8 C1 C2 C7 127.7(2) . . . . ?
N1 C1 C2 C3 62.0(2) . . . . ?
C14 C1 C2 C3 -177.0(2) . . . . ?
C8 C1 C2 C3 -57.5(3) . . . . ?
C7 C2 C3 C4 -1.2(4) . . . . ?
C1 C2 C3 C4 -176.3(2) . . . . ?
C2 C3 C4 C5 0.3(4) . . . . ?
C3 C4 C5 C6 0.6(4) . . . . ?
C4 C5 C6 C7 -0.6(4) . . . . ?
C3 C2 C7 C6 1.2(4) . . . . ?
C1 C2 C7 C6 176.1(2) . . . . ?
C5 C6 C7 C2 -0.4(4) . . . . ?
N1 C1 C8 C13 -126.9(2) . . . . ?
C14 C1 C8 C13 114.8(2) . . . . ?
C2 C1 C8 C13 -9.5(3) . . . . ?
N1 C1 C8 C9 58.6(2) . . . . ?
C14 C1 C8 C9 -59.7(2) . . . . ?
C2 C1 C8 C9 175.98(18) . . . . ?
C13 C8 C9 C10 2.4(3) . . . . ?
C1 C8 C9 C10 177.2(2) . . . . ?
C8 C9 C10 C11 -1.2(4) . . . . ?
C9 C10 C11 C12 -0.6(4) . . . . ?
C10 C11 C12 C13 1.3(4) . . . . ?
C9 C8 C13 C12 -1.8(3) . . . . ?
C1 C8 C13 C12 -176.3(2) . . . . ?
C11 C12 C13 C8 0.0(4) . . . . ?
N1 C1 C14 C19 -1.8(3) . . . . ?
C2 C1 C14 C19 -120.3(2) . . . . ?
C8 C1 C14 C19 115.8(2) . . . . ?
N1 C1 C14 C15 -177.3(2) . . . . ?
C2 C1 C14 C15 64.3(3) . . . . ?
C8 C1 C14 C15 -59.6(3) . . . . ?
C19 C14 C15 C16 0.2(4) . . . . ?
C1 C14 C15 C16 175.9(3) . . . . ?
C14 C15 C16 C17 -1.0(5) . . . . ?
C15 C16 C17 C18 0.9(5) . . . . ?
C16 C17 C18 C19 0.0(5) . . . . ?
C15 C14 C19 C18 0.7(4) . . . . ?
C1 C14 C19 C18 -174.8(2) . . . . ?
C17 C18 C19 C14 -0.8(5) . . . . ?
P2 N2 C20 C21 135.31(18) . . . . ?
P1 N2 C20 C21 -19.3(2) . . . . ?
P2 N2 C20 C33 -103.7(2) . . . . ?
P1 N2 C20 C33 101.62(19) . . . . ?
P2 N2 C20 C27 14.0(3) . . . . ?
P1 N2 C20 C27 -140.67(15) . . . . ?
N2 C20 C21 C26 105.8(2) . . . . ?
C33 C20 C21 C26 -14.7(3) . . . . ?
C27 C20 C21 C26 -134.4(2) . . . . ?
N2 C20 C21 C22 -68.4(2) . . . . ?
C33 C20 C21 C22 171.01(19) . . . . ?
C27 C20 C21 C22 51.4(3) . . . . ?
C26 C21 C22 C23 3.1(3) . . . . ?
C20 C21 C22 C23 177.6(2) . . . . ?
C21 C22 C23 C24 -0.3(4) . . . . ?
C22 C23 C24 C25 -2.5(4) . . . . ?
C23 C24 C25 C26 2.5(4) . . . . ?
C22 C21 C26 C25 -3.1(3) . . . . ?
C20 C21 C26 C25 -177.4(2) . . . . ?
C24 C25 C26 C21 0.4(4) . . . . ?
N2 C20 C27 C32 132.8(2) . . . . ?
C21 C20 C27 C32 16.5(3) . . . . ?
C33 C20 C27 C32 -106.3(2) . . . . ?
N2 C20 C27 C28 -52.3(3) . . . . ?
C21 C20 C27 C28 -168.59(19) . . . . ?
C33 C20 C27 C28 68.5(2) . . . . ?
C32 C27 C28 C29 -4.4(3) . . . . ?
C20 C27 C28 C29 -179.4(2) . . . . ?
C27 C28 C29 C30 2.5(4) . . . . ?
C28 C29 C30 C31 0.7(4) . . . . ?
C29 C30 C31 C32 -2.1(4) . . . . ?
C28 C27 C32 C31 3.0(4) . . . . ?
C20 C27 C32 C31 177.9(2) . . . . ?
C30 C31 C32 C27 0.2(4) . . . . ?
N2 C20 C33 C34 -1.0(3) . . . . ?
C21 C20 C33 C34 115.4(2) . . . . ?
C27 C20 C33 C34 -121.2(2) . . . . ?
N2 C20 C33 C38 177.80(18) . . . . ?
C21 C20 C33 C38 -65.8(2) . . . . ?
C27 C20 C33 C38 57.6(2) . . . . ?
C38 C33 C34 C35 0.3(3) . . . . ?
C20 C33 C34 C35 179.1(2) . . . . ?
C33 C34 C35 C36 0.3(3) . . . . ?
C34 C35 C36 C37 -0.6(4) . . . . ?
C35 C36 C37 C38 0.4(4) . . . . ?
C36 C37 C38 C33 0.3(4) . . . . ?
C34 C33 C38 C37 -0.6(3) . . . . ?
C20 C33 C38 C37 -179.5(2) . . . . ?
 
_diffrn_measured_fraction_theta_max    0.994
_diffrn_reflns_theta_full              27.47
_diffrn_measured_fraction_theta_full   0.994
_refine_diff_density_max    0.381
_refine_diff_density_min   -0.375
_refine_diff_density_rms    0.058

#=============================================================================
 
data_av191b1_(TritylNPCl)2_CH2Cl2

_audit_author_name                'Villinger, A.' 
_audit_creation_method            SHELXL-97 

#==============================================================================

# CHEMICAL DATA

_chemical_name_systematic
;
1,3-dichloro-2,4-bis(triphenylmethyl)-cyclo-1,3-diphospha-2,4-diazane 
dichloromethane solvate
;
_chemical_name_common             ?
_chemical_melting_point           ?
_chemical_formula_moiety          'C38 H30 Cl2 N2 P2, C H2 Cl2'
_chemical_formula_sum
 'C39 H32 Cl4 N2 P2'
_chemical_formula_weight          732.41
 
loop_
 _atom_type_symbol
 _atom_type_description
 _atom_type_scat_dispersion_real
 _atom_type_scat_dispersion_imag
 _atom_type_scat_source
 'C'  'C'   0.0033   0.0016
 'International Tables Vol C Tables 4.2.6.8 and 6.1.1.4'
 'H'  'H'   0.0000   0.0000
 'International Tables Vol C Tables 4.2.6.8 and 6.1.1.4'
 'N'  'N'   0.0061   0.0033
 'International Tables Vol C Tables 4.2.6.8 and 6.1.1.4'
 'P'  'P'   0.1023   0.0942
 'International Tables Vol C Tables 4.2.6.8 and 6.1.1.4'
 'Cl'  'Cl'   0.1484   0.1585
 'International Tables Vol C Tables 4.2.6.8 and 6.1.1.4'
 
#==============================================================================

# CRYSTAL DATA
 
_symmetry_cell_setting            monoclinic
_symmetry_space_group_name_H-M    'P 21'
_symmetry_space_group_name_Hall   'P 2yb'
_symmetry_Int_Tables_number       4
 
loop_
 _symmetry_equiv_pos_as_xyz
 'x, y, z'
 '-x, y+1/2, -z'
 
_cell_length_a                    9.9150(3)
_cell_length_b                    14.6355(4)
_cell_length_c                    12.0346(3)
_cell_angle_alpha                 90.00
_cell_angle_beta                  90.437(2)
_cell_angle_gamma                 90.00
_cell_volume                      1746.30(8)
_cell_formula_units_Z             2
_cell_measurement_temperature     173(2)
_cell_measurement_reflns_used     7668    
_cell_measurement_theta_min       4.382
_cell_measurement_theta_max       61.672
 
_exptl_crystal_description        plate
_exptl_crystal_colour             colourless
_exptl_crystal_size_max           0.92
_exptl_crystal_size_mid           0.21
_exptl_crystal_size_min           0.06
_exptl_crystal_density_meas       ?
_exptl_crystal_density_diffrn     1.393
_exptl_crystal_density_method     'not measured'
_exptl_crystal_F_000              756
_exptl_absorpt_coefficient_mu     0.463
_exptl_absorpt_correction_type    multi-scan
_exptl_absorpt_correction_T_min   0.6755
_exptl_absorpt_correction_T_max   0.9728
_exptl_absorpt_process_details    '(SADABS; Sheldrick, 2004)'

#==============================================================================

# EXPERIMENTAL DATA
 
_exptl_special_details
;
 ?
;
 
_diffrn_ambient_temperature       173(2)
_diffrn_radiation_wavelength      0.71073
_diffrn_radiation_type            MoK\a
_diffrn_radiation_source          'sealed tube'
_diffrn_radiation_monochromator   graphite
_diffrn_measurement_device_type   'Bruker-Nonius Apex X8-CCD-diffractometer'
_diffrn_measurement_method        'phi and omega scans'
_diffrn_detector_area_resol_mean  ?
_diffrn_standards_number          ?
_diffrn_standards_interval_count  ?
_diffrn_standards_interval_time   ?
_diffrn_standards_decay_%         ?
_diffrn_reflns_number             15639
_diffrn_reflns_av_R_equivalents   0.0227
_diffrn_reflns_av_sigmaI/netI     0.0402
_diffrn_reflns_limit_h_min        -12
_diffrn_reflns_limit_h_max        13
_diffrn_reflns_limit_k_min        -16
_diffrn_reflns_limit_k_max        19
_diffrn_reflns_limit_l_min        -15
_diffrn_reflns_limit_l_max        14
_diffrn_reflns_theta_min          2.65
_diffrn_reflns_theta_max          28.00
_reflns_number_total              6877
_reflns_number_gt                 5903
_reflns_threshold_expression      >2\s(I)
 
_computing_data_collection        'Bruker Apex V7.51A'
_computing_cell_refinement        'Bruker Apex V7.51A'
_computing_data_reduction         'Bruker SAINT'
_computing_structure_solution     'SHELXS-97 (Sheldrick, 1997)'
_computing_structure_refinement   'SHELXL-97 (Sheldrick, 1997)'
_computing_molecular_graphics     'ORTEP-3v2.01 (Farrugia, 1997)' 
_computing_publication_material   'SHELXL-97'

#==============================================================================

# REFINEMENT DATA 

_refine_special_details
;
 All H atoms were positioned geometrically and refined using a riding model, 
 with C---H = 0.98 (methyl groups), 0.99\%A (methylene groups), 1.00\%A 
 (methine groups) or 0.95 \%A (aryl CH) and with <i>U</i>~iso~(H) = 1.5 times 
 <i>U</i>~eq~(C) (methyl groups) or with <i>U</i>~iso~(H) = 1.2 times 
 <i>U</i>~eq~(C) (methylene  groups, aryl CH, methine groups). Torsion angles 
 of all methyl groups were allowed to refine.
 
 Refinement of F^2^ against ALL reflections.  The weighted R-factor wR and
 goodness of fit S are based on F^2^, conventional R-factors R are based
 on F, with F set to zero for negative F^2^. The threshold expression of
 F^2^ > 2\s(F^2^) is used only for calculating R-factors(gt) etc. and is
 not relevant to the choice of reflections for refinement.  R-factors based
 on F^2^ are statistically about twice as large as those based on F, and R-
 factors based on ALL data will be even larger.
;
 
_refine_ls_structure_factor_coef  Fsqd
_refine_ls_matrix_type            full
_refine_ls_weighting_scheme       calc
_refine_ls_weighting_details
 'calc w=1/[\s^2^(Fo^2^)+(0.0338P)^2^+0.0360P] where P=(Fo^2^+2Fc^2^)/3'
_atom_sites_solution_primary      direct
_atom_sites_solution_secondary    difmap
_atom_sites_solution_hydrogens    geom
_refine_ls_hydrogen_treatment     constr
_refine_ls_extinction_method      none
_refine_ls_extinction_coef        ?
_refine_ls_abs_structure_details
 'Flack H D (1983), Acta Cryst. A39, 876-881'
_refine_ls_abs_structure_Flack    -0.01(4)
_refine_ls_number_reflns          6877
_refine_ls_number_parameters      446
_refine_ls_number_restraints      1
_refine_ls_R_factor_all           0.0447
_refine_ls_R_factor_gt            0.0326
_refine_ls_wR_factor_ref          0.0665
_refine_ls_wR_factor_gt           0.0636
_refine_ls_goodness_of_fit_ref    1.034
_refine_ls_restrained_S_all       1.034
_refine_ls_shift/su_max           0.001
_refine_ls_shift/su_mean          0.000

#==============================================================================

# ATOMIC COORDINATES AND DISPLACEMENT PARAMETERS
 
loop_
 _atom_site_label
 _atom_site_type_symbol
 _atom_site_fract_x
 _atom_site_fract_y
 _atom_site_fract_z
 _atom_site_U_iso_or_equiv
 _atom_site_adp_type
 _atom_site_occupancy
 _atom_site_symmetry_multiplicity
 _atom_site_calc_flag
 _atom_site_refinement_flags
 _atom_site_disorder_assembly
 _atom_site_disorder_group
P1 P 0.18802(5) 0.65368(4) 0.09095(4) 0.01860(12) Uani 1 1 d . . .
P2 P 0.42656(5) 0.65049(3) 0.17802(4) 0.01644(11) Uani 1 1 d . . .
N1 N 0.26247(16) 0.64359(11) 0.21983(12) 0.0166(3) Uani 1 1 d . . .
N2 N 0.35281(16) 0.64177(10) 0.04946(12) 0.0157(3) Uani 1 1 d . . .
Cl1 Cl 0.09982(5) 0.52497(4) 0.05427(4) 0.02928(13) Uani 1 1 d . . .
Cl2 Cl 0.50347(5) 0.51612(3) 0.21378(4) 0.02541(13) Uani 1 1 d . . .
C1 C 0.19968(19) 0.64857(14) 0.33298(14) 0.0182(4) Uani 1 1 d . . .
C2 C 0.0523(2) 0.67892(14) 0.31296(15) 0.0193(5) Uani 1 1 d . . .
C3 C -0.0562(2) 0.62419(14) 0.34355(16) 0.0235(5) Uani 1 1 d . . .
H3 H -0.0396 0.5674 0.3794 0.028 Uiso 1 1 calc R . .
C4 C -0.1883(2) 0.65128(17) 0.32242(16) 0.0292(5) Uani 1 1 d . . .
H4 H -0.2611 0.6131 0.3437 0.035 Uiso 1 1 calc R . .
C5 C -0.2137(2) 0.73390(15) 0.27041(17) 0.0289(5) Uani 1 1 d . . .
H5 H -0.3040 0.7527 0.2566 0.035 Uiso 1 1 calc R . .
C6 C -0.1082(2) 0.78879(16) 0.23877(18) 0.0278(5) Uani 1 1 d . . .
H6 H -0.1257 0.8453 0.2027 0.033 Uiso 1 1 calc R . .
C7 C 0.0241(2) 0.76174(13) 0.25950(16) 0.0221(5) Uani 1 1 d . . .
H7 H 0.0963 0.8000 0.2371 0.026 Uiso 1 1 calc R . .
C8 C 0.2015(2) 0.55417(14) 0.38992(16) 0.0197(5) Uani 1 1 d . . .
C9 C 0.1851(2) 0.54858(15) 0.50464(16) 0.0272(5) Uani 1 1 d . . .
H9 H 0.1833 0.6029 0.5479 0.033 Uiso 1 1 calc R . .
C10 C 0.1713(3) 0.46468(16) 0.55598(18) 0.0360(6) Uani 1 1 d . . .
H10 H 0.1602 0.4618 0.6342 0.043 Uiso 1 1 calc R . .
C11 C 0.1736(3) 0.38490(16) 0.4946(2) 0.0345(6) Uani 1 1 d . . .
H11 H 0.1630 0.3274 0.5301 0.041 Uiso 1 1 calc R . .
C12 C 0.1915(2) 0.38989(16) 0.38098(19) 0.0294(6) Uani 1 1 d . . .
H12 H 0.1948 0.3355 0.3381 0.035 Uiso 1 1 calc R . .
C13 C 0.2045(2) 0.47399(14) 0.32964(17) 0.0227(5) Uani 1 1 d . . .
H13 H 0.2156 0.4766 0.2514 0.027 Uiso 1 1 calc R . .
C14 C 0.2825(2) 0.71649(14) 0.40584(15) 0.0199(5) Uani 1 1 d . . .
C15 C 0.2304(2) 0.79628(15) 0.44932(17) 0.0287(5) Uani 1 1 d . . .
H15 H 0.1398 0.8130 0.4333 0.034 Uiso 1 1 calc R . .
C16 C 0.3103(3) 0.85261(17) 0.51689(18) 0.0361(6) Uani 1 1 d . . .
H16 H 0.2736 0.9076 0.5457 0.043 Uiso 1 1 calc R . .
C17 C 0.4414(3) 0.82917(17) 0.54198(18) 0.0361(6) Uani 1 1 d . . .
H17 H 0.4953 0.8678 0.5876 0.043 Uiso 1 1 calc R . .
C18 C 0.4940(3) 0.74901(16) 0.50032(19) 0.0309(6) Uani 1 1 d . . .
H18 H 0.5845 0.7324 0.5171 0.037 Uiso 1 1 calc R . .
C19 C 0.4153(2) 0.69270(15) 0.43416(16) 0.0236(5) Uani 1 1 d . . .
H19 H 0.4519 0.6369 0.4075 0.028 Uiso 1 1 calc R . .
C20 C 0.4049(2) 0.66335(13) -0.06445(14) 0.0170(4) Uani 1 1 d . . .
C21 C 0.3040(2) 0.73321(14) -0.11349(16) 0.0206(5) Uani 1 1 d . . .
C22 C 0.2938(2) 0.81966(14) -0.06520(18) 0.0272(5) Uani 1 1 d . . .
H22 H 0.3509 0.8349 -0.0042 0.033 Uiso 1 1 calc R . .
C23 C 0.2025(3) 0.88358(16) -0.1041(2) 0.0347(6) Uani 1 1 d . . .
H23 H 0.1969 0.9420 -0.0699 0.042 Uiso 1 1 calc R . .
C24 C 0.1186(3) 0.86201(17) -0.1937(2) 0.0374(6) Uani 1 1 d . . .
H24 H 0.0574 0.9063 -0.2221 0.045 Uiso 1 1 calc R . .
C25 C 0.1245(3) 0.77720(18) -0.2407(2) 0.0362(6) Uani 1 1 d . . .
H25 H 0.0660 0.7622 -0.3009 0.043 Uiso 1 1 calc R . .
C26 C 0.2164(2) 0.71220(15) -0.20064(17) 0.0268(5) Uani 1 1 d . . .
H26 H 0.2190 0.6531 -0.2333 0.032 Uiso 1 1 calc R . .
C27 C 0.5504(2) 0.70008(13) -0.05482(15) 0.0184(4) Uani 1 1 d . . .
C28 C 0.5940(2) 0.78014(14) -0.10491(16) 0.0240(5) Uani 1 1 d . . .
H28 H 0.5316 0.8172 -0.1447 0.029 Uiso 1 1 calc R . .
C29 C 0.7284(3) 0.80630(15) -0.09711(19) 0.0317(6) Uani 1 1 d . . .
H29 H 0.7568 0.8611 -0.1323 0.038 Uiso 1 1 calc R . .
C30 C 0.8211(2) 0.75477(16) -0.03969(18) 0.0323(6) Uani 1 1 d . . .
H30 H 0.9121 0.7745 -0.0331 0.039 Uiso 1 1 calc R . .
C31 C 0.7799(2) 0.67312(16) 0.00885(17) 0.0295(5) Uani 1 1 d . . .
H31 H 0.8430 0.6364 0.0485 0.035 Uiso 1 1 calc R . .
C32 C 0.6472(2) 0.64567(15) -0.00077(15) 0.0219(4) Uani 1 1 d . . .
H32 H 0.6208 0.5887 0.0299 0.026 Uiso 1 1 calc R . .
C33 C 0.4171(2) 0.57608(13) -0.13478(16) 0.0196(5) Uani 1 1 d . . .
C34 C 0.4587(2) 0.58405(14) -0.24539(17) 0.0263(5) Uani 1 1 d . . .
H34 H 0.4701 0.6429 -0.2772 0.032 Uiso 1 1 calc R . .
C35 C 0.4833(3) 0.50737(15) -0.30850(17) 0.0322(6) Uani 1 1 d . . .
H35 H 0.5093 0.5138 -0.3839 0.039 Uiso 1 1 calc R . .
C36 C 0.4704(3) 0.42114(15) -0.26292(19) 0.0306(6) Uani 1 1 d . . .
H36 H 0.4897 0.3684 -0.3060 0.037 Uiso 1 1 calc R . .
C37 C 0.4290(2) 0.41234(14) -0.15380(18) 0.0268(5) Uani 1 1 d . . .
H37 H 0.4191 0.3533 -0.1220 0.032 Uiso 1 1 calc R . .
C38 C 0.4019(2) 0.48952(13) -0.09070(17) 0.0214(5) Uani 1 1 d . . .
H38 H 0.3725 0.4827 -0.0162 0.026 Uiso 1 1 calc R . .
C39A C 0.8304(5) 0.5995(3) 0.7528(4) 0.0462(11) Uani 0.651(5) 1 d P A 1
H39A H 0.8939 0.6423 0.7895 0.055 Uiso 0.651(5) 1 calc PR A 1
H39B H 0.7387 0.6135 0.7801 0.055 Uiso 0.651(5) 1 calc PR A 1
Cl3A Cl 0.8344(3) 0.6185(3) 0.6068(3) 0.0496(6) Uani 0.651(5) 1 d P A 1
Cl4A Cl 0.8721(4) 0.48871(15) 0.79149(18) 0.1070(11) Uani 0.651(5) 1 d P A 1
C39B C 0.7963(10) 0.5490(7) 0.7348(7) 0.0462(11) Uani 0.349(5) 1 d P A 2
H39C H 0.7475 0.4919 0.7164 0.055 Uiso 0.349(5) 1 calc PR A 2
H39D H 0.7375 0.5868 0.7825 0.055 Uiso 0.349(5) 1 calc PR A 2
Cl3B Cl 0.8309(10) 0.6042(7) 0.6213(7) 0.106(3) Uani 0.349(5) 1 d P A 2
Cl4B Cl 0.9444(3) 0.5233(3) 0.8054(2) 0.0472(9) Uani 0.349(5) 1 d P A 2
 
loop_
 _atom_site_aniso_label
 _atom_site_aniso_U_11
 _atom_site_aniso_U_22
 _atom_site_aniso_U_33
 _atom_site_aniso_U_23
 _atom_site_aniso_U_13
 _atom_site_aniso_U_12
P1 0.0165(3) 0.0234(3) 0.0159(2) 0.0005(2) 0.00018(19) 0.0017(2)
P2 0.0163(3) 0.0169(3) 0.0161(2) 0.0000(2) 0.00067(19) -0.0008(2)
N1 0.0153(9) 0.0194(8) 0.0150(7) 0.0011(7) 0.0017(6) 0.0011(7)
N2 0.0152(9) 0.0164(8) 0.0155(7) -0.0003(7) 0.0015(6) 0.0015(7)
Cl1 0.0238(3) 0.0306(3) 0.0334(3) -0.0033(3) -0.0021(2) -0.0065(2)
Cl2 0.0234(3) 0.0246(3) 0.0282(3) 0.0062(2) 0.0010(2) 0.0052(2)
C1 0.0183(11) 0.0215(10) 0.0147(9) -0.0016(9) 0.0033(7) -0.0001(9)
C2 0.0182(11) 0.0269(12) 0.0127(9) -0.0051(8) -0.0006(8) 0.0023(9)
C3 0.0233(12) 0.0273(12) 0.0199(10) -0.0019(9) 0.0006(9) 0.0000(9)
C4 0.0196(12) 0.0390(13) 0.0290(11) -0.0055(12) 0.0007(9) -0.0073(11)
C5 0.0213(13) 0.0393(14) 0.0260(12) -0.0103(11) -0.0044(9) 0.0090(11)
C6 0.0369(15) 0.0257(12) 0.0209(11) -0.0072(9) -0.0024(10) 0.0101(11)
C7 0.0265(13) 0.0199(11) 0.0199(10) -0.0034(9) 0.0015(9) 0.0008(9)
C8 0.0129(11) 0.0261(12) 0.0200(10) 0.0038(9) -0.0005(8) 0.0004(8)
C9 0.0319(14) 0.0301(12) 0.0197(11) 0.0027(10) 0.0001(9) 0.0011(10)
C10 0.0413(16) 0.0447(16) 0.0221(12) 0.0106(12) 0.0013(11) 0.0006(13)
C11 0.0332(15) 0.0298(13) 0.0404(14) 0.0172(11) 0.0011(11) -0.0006(11)
C12 0.0310(15) 0.0244(12) 0.0328(13) 0.0033(10) -0.0008(10) 0.0008(10)
C13 0.0243(13) 0.0247(12) 0.0190(10) 0.0024(9) -0.0002(9) -0.0008(10)
C14 0.0227(12) 0.0242(11) 0.0128(10) 0.0017(8) 0.0010(8) -0.0057(9)
C15 0.0308(14) 0.0300(12) 0.0253(12) -0.0051(10) 0.0010(10) 0.0005(10)
C16 0.0444(17) 0.0335(13) 0.0305(13) -0.0112(11) 0.0035(11) -0.0063(12)
C17 0.0415(17) 0.0419(15) 0.0246(12) -0.0062(11) -0.0035(11) -0.0199(13)
C18 0.0281(13) 0.0426(15) 0.0220(11) 0.0038(11) -0.0054(9) -0.0075(11)
C19 0.0259(13) 0.0288(11) 0.0161(10) 0.0014(9) 0.0016(9) -0.0020(10)
C20 0.0214(11) 0.0154(10) 0.0141(9) 0.0018(8) 0.0011(8) 0.0007(9)
C21 0.0232(12) 0.0226(12) 0.0161(10) 0.0039(9) 0.0033(8) 0.0020(9)
C22 0.0303(14) 0.0218(11) 0.0294(12) 0.0001(10) -0.0006(10) 0.0017(10)
C23 0.0327(15) 0.0219(12) 0.0497(15) 0.0037(11) 0.0080(12) 0.0074(10)
C24 0.0297(15) 0.0408(15) 0.0418(14) 0.0198(12) 0.0027(11) 0.0101(12)
C25 0.0297(15) 0.0492(16) 0.0297(13) 0.0045(12) -0.0063(10) 0.0072(12)
C26 0.0265(13) 0.0299(12) 0.0240(11) 0.0012(10) 0.0010(9) 0.0029(10)
C27 0.0232(12) 0.0192(11) 0.0129(9) -0.0048(8) 0.0040(8) -0.0006(9)
C28 0.0312(13) 0.0199(11) 0.0209(11) 0.0011(9) 0.0045(9) -0.0012(10)
C29 0.0367(15) 0.0284(13) 0.0301(12) -0.0008(10) 0.0120(11) -0.0133(11)
C30 0.0245(14) 0.0426(14) 0.0299(12) -0.0047(11) 0.0079(10) -0.0110(11)
C31 0.0216(12) 0.0447(15) 0.0224(11) -0.0019(10) 0.0045(9) 0.0044(10)
C32 0.0248(12) 0.0216(10) 0.0193(9) 0.0005(9) 0.0066(8) 0.0007(10)
C33 0.0185(12) 0.0201(11) 0.0200(11) -0.0018(9) -0.0007(8) 0.0009(9)
C34 0.0343(15) 0.0217(11) 0.0229(12) -0.0001(9) 0.0065(10) -0.0021(10)
C35 0.0456(15) 0.0331(14) 0.0181(11) -0.0070(10) 0.0085(10) -0.0026(11)
C36 0.0388(16) 0.0242(12) 0.0288(13) -0.0105(10) 0.0042(10) -0.0006(10)
C37 0.0339(15) 0.0186(11) 0.0278(12) -0.0036(10) 0.0000(10) -0.0012(10)
C38 0.0255(13) 0.0186(11) 0.0201(10) -0.0006(9) 0.0001(9) -0.0015(9)
C39A 0.058(3) 0.040(3) 0.040(2) -0.004(2) 0.0087(19) 0.005(2)
Cl3A 0.0605(13) 0.0600(11) 0.0286(8) 0.0056(10) 0.0071(8) 0.0143(9)
Cl4A 0.173(3) 0.0509(11) 0.0971(13) 0.0033(9) -0.0257(15) 0.0392(15)
C39B 0.058(3) 0.040(3) 0.040(2) -0.004(2) 0.0087(19) 0.005(2)
Cl3B 0.111(5) 0.135(6) 0.070(4) 0.042(3) 0.014(3) -0.011(3)
Cl4B 0.0416(15) 0.0586(18) 0.0412(12) -0.0129(12) -0.0098(9) 0.0095(12)

#==============================================================================

# MOLECULAR GEOMETRY
 
_geom_special_details
;
 All s.u.'s (except the s.u. in the dihedral angle between two l.s. planes)
 are estimated using the full covariance matrix.  The cell s.u.'s are taken
 into account individually in the estimation of s.u.'s in distances, angles
 and torsion angles; correlations between s.u.'s in cell parameters are only
 used when they are defined by crystal symmetry.  An approximate (isotropic)
 treatment of cell s.u.'s is used for estimating s.u.'s involving l.s. planes.
;
 
loop_
 _geom_bond_atom_site_label_1
 _geom_bond_atom_site_label_2
 _geom_bond_distance
 _geom_bond_site_symmetry_2
 _geom_bond_publ_flag
P1 N1 1.7189(15) . ?
P1 N2 1.7210(16) . ?
P1 Cl1 2.1219(7) . ?
P1 P2 2.5800(7) . ?
P2 N1 1.7097(16) . ?
P2 N2 1.7110(16) . ?
P2 Cl2 2.1515(7) . ?
N1 C1 1.503(2) . ?
N2 C20 1.502(2) . ?
C1 C8 1.542(3) . ?
C1 C2 1.544(3) . ?
C1 C14 1.556(3) . ?
C2 C3 1.393(3) . ?
C2 C7 1.400(3) . ?
C3 C4 1.390(3) . ?
C3 H3 0.9500 . ?
C4 C5 1.384(3) . ?
C4 H4 0.9500 . ?
C5 C6 1.375(3) . ?
C5 H5 0.9500 . ?
C6 C7 1.391(3) . ?
C6 H6 0.9500 . ?
C7 H7 0.9500 . ?
C8 C13 1.380(3) . ?
C8 C9 1.394(3) . ?
C9 C10 1.382(3) . ?
C9 H9 0.9500 . ?
C10 C11 1.382(3) . ?
C10 H10 0.9500 . ?
C11 C12 1.382(3) . ?
C11 H11 0.9500 . ?
C12 C13 1.384(3) . ?
C12 H12 0.9500 . ?
C13 H13 0.9500 . ?
C14 C15 1.381(3) . ?
C14 C19 1.401(3) . ?
C15 C16 1.400(3) . ?
C15 H15 0.9500 . ?
C16 C17 1.376(4) . ?
C16 H16 0.9500 . ?
C17 C18 1.380(3) . ?
C17 H17 0.9500 . ?
C18 C19 1.383(3) . ?
C18 H18 0.9500 . ?
C19 H19 0.9500 . ?
C20 C33 1.537(3) . ?
C20 C27 1.543(3) . ?
C20 C21 1.545(3) . ?
C21 C26 1.391(3) . ?
C21 C22 1.396(3) . ?
C22 C23 1.381(3) . ?
C22 H22 0.9500 . ?
C23 C24 1.393(3) . ?
C23 H23 0.9500 . ?
C24 C25 1.366(4) . ?
C24 H24 0.9500 . ?
C25 C26 1.400(3) . ?
C25 H25 0.9500 . ?
C26 H26 0.9500 . ?
C27 C28 1.388(3) . ?
C27 C32 1.403(3) . ?
C28 C29 1.389(3) . ?
C28 H28 0.9500 . ?
C29 C30 1.372(3) . ?
C29 H29 0.9500 . ?
C30 C31 1.393(3) . ?
C30 H30 0.9500 . ?
C31 C32 1.380(3) . ?
C31 H31 0.9500 . ?
C32 H32 0.9500 . ?
C33 C38 1.382(3) . ?
C33 C34 1.402(3) . ?
C34 C35 1.378(3) . ?
C34 H34 0.9500 . ?
C35 C36 1.382(3) . ?
C35 H35 0.9500 . ?
C36 C37 1.385(3) . ?
C36 H36 0.9500 . ?
C37 C38 1.388(3) . ?
C37 H37 0.9500 . ?
C38 H38 0.9500 . ?
C39A Cl4A 1.736(5) . ?
C39A Cl3A 1.780(6) . ?
C39A H39A 0.9900 . ?
C39A H39B 0.9900 . ?
C39B Cl3B 1.625(13) . ?
C39B Cl4B 1.732(10) . ?
C39B H39C 0.9900 . ?
C39B H39D 0.9900 . ?
 
loop_
 _geom_angle_atom_site_label_1
 _geom_angle_atom_site_label_2
 _geom_angle_atom_site_label_3
 _geom_angle
 _geom_angle_site_symmetry_1
 _geom_angle_site_symmetry_3
 _geom_angle_publ_flag
N1 P1 N2 81.43(7) . . ?
N1 P1 Cl1 106.56(6) . . ?
N2 P1 Cl1 103.91(6) . . ?
N1 P1 P2 41.06(5) . . ?
N2 P1 P2 41.11(5) . . ?
Cl1 P1 P2 116.33(3) . . ?
N1 P2 N2 81.99(7) . . ?
N1 P2 Cl2 102.93(6) . . ?
N2 P2 Cl2 105.14(6) . . ?
N1 P2 P1 41.33(5) . . ?
N2 P2 P1 41.41(5) . . ?
Cl2 P2 P1 114.85(3) . . ?
C1 N1 P2 131.71(13) . . ?
C1 N1 P1 129.43(13) . . ?
P2 N1 P1 97.61(7) . . ?
C20 N2 P2 131.44(13) . . ?
C20 N2 P1 125.27(12) . . ?
P2 N2 P1 97.48(7) . . ?
N1 C1 C8 110.82(15) . . ?
N1 C1 C2 105.70(14) . . ?
C8 C1 C2 109.57(16) . . ?
N1 C1 C14 108.73(15) . . ?
C8 C1 C14 108.51(15) . . ?
C2 C1 C14 113.51(17) . . ?
C3 C2 C7 117.9(2) . . ?
C3 C2 C1 121.67(18) . . ?
C7 C2 C1 120.42(19) . . ?
C4 C3 C2 121.1(2) . . ?
C4 C3 H3 119.5 . . ?
C2 C3 H3 119.5 . . ?
C5 C4 C3 120.0(2) . . ?
C5 C4 H4 120.0 . . ?
C3 C4 H4 120.0 . . ?
C6 C5 C4 120.0(2) . . ?
C6 C5 H5 120.0 . . ?
C4 C5 H5 120.0 . . ?
C5 C6 C7 120.2(2) . . ?
C5 C6 H6 119.9 . . ?
C7 C6 H6 119.9 . . ?
C6 C7 C2 120.9(2) . . ?
C6 C7 H7 119.5 . . ?
C2 C7 H7 119.5 . . ?
C13 C8 C9 118.28(18) . . ?
C13 C8 C1 121.90(16) . . ?
C9 C8 C1 119.45(18) . . ?
C10 C9 C8 120.5(2) . . ?
C10 C9 H9 119.7 . . ?
C8 C9 H9 119.7 . . ?
C11 C10 C9 120.7(2) . . ?
C11 C10 H10 119.7 . . ?
C9 C10 H10 119.7 . . ?
C10 C11 C12 119.1(2) . . ?
C10 C11 H11 120.4 . . ?
C12 C11 H11 120.4 . . ?
C11 C12 C13 120.1(2) . . ?
C11 C12 H12 119.9 . . ?
C13 C12 H12 119.9 . . ?
C8 C13 C12 121.28(19) . . ?
C8 C13 H13 119.4 . . ?
C12 C13 H13 119.4 . . ?
C15 C14 C19 118.11(19) . . ?
C15 C14 C1 123.8(2) . . ?
C19 C14 C1 117.99(18) . . ?
C14 C15 C16 120.4(2) . . ?
C14 C15 H15 119.8 . . ?
C16 C15 H15 119.8 . . ?
C17 C16 C15 120.7(2) . . ?
C17 C16 H16 119.7 . . ?
C15 C16 H16 119.7 . . ?
C16 C17 C18 119.4(2) . . ?
C16 C17 H17 120.3 . . ?
C18 C17 H17 120.3 . . ?
C17 C18 C19 120.2(2) . . ?
C17 C18 H18 119.9 . . ?
C19 C18 H18 119.9 . . ?
C18 C19 C14 121.1(2) . . ?
C18 C19 H19 119.4 . . ?
C14 C19 H19 119.4 . . ?
N2 C20 C33 110.89(15) . . ?
N2 C20 C27 109.43(14) . . ?
C33 C20 C27 104.71(16) . . ?
N2 C20 C21 105.15(15) . . ?
C33 C20 C21 113.12(15) . . ?
C27 C20 C21 113.61(15) . . ?
C26 C21 C22 117.85(19) . . ?
C26 C21 C20 122.73(18) . . ?
C22 C21 C20 119.32(18) . . ?
C23 C22 C21 121.5(2) . . ?
C23 C22 H22 119.3 . . ?
C21 C22 H22 119.3 . . ?
C22 C23 C24 119.7(2) . . ?
C22 C23 H23 120.2 . . ?
C24 C23 H23 120.2 . . ?
C25 C24 C23 120.0(2) . . ?
C25 C24 H24 120.0 . . ?
C23 C24 H24 120.0 . . ?
C24 C25 C26 120.3(2) . . ?
C24 C25 H25 119.8 . . ?
C26 C25 H25 119.8 . . ?
C21 C26 C25 120.7(2) . . ?
C21 C26 H26 119.7 . . ?
C25 C26 H26 119.7 . . ?
C28 C27 C32 117.8(2) . . ?
C28 C27 C20 123.75(18) . . ?
C32 C27 C20 118.22(17) . . ?
C27 C28 C29 120.3(2) . . ?
C27 C28 H28 119.8 . . ?
C29 C28 H28 119.8 . . ?
C30 C29 C28 121.4(2) . . ?
C30 C29 H29 119.3 . . ?
C28 C29 H29 119.3 . . ?
C29 C30 C31 119.0(2) . . ?
C29 C30 H30 120.5 . . ?
C31 C30 H30 120.5 . . ?
C32 C31 C30 119.8(2) . . ?
C32 C31 H31 120.1 . . ?
C30 C31 H31 120.1 . . ?
C31 C32 C27 121.5(2) . . ?
C31 C32 H32 119.3 . . ?
C27 C32 H32 119.3 . . ?
C38 C33 C34 118.33(18) . . ?
C38 C33 C20 122.75(16) . . ?
C34 C33 C20 118.59(17) . . ?
C35 C34 C33 120.69(19) . . ?
C35 C34 H34 119.7 . . ?
C33 C34 H34 119.7 . . ?
C34 C35 C36 120.50(19) . . ?
C34 C35 H35 119.8 . . ?
C36 C35 H35 119.8 . . ?
C35 C36 C37 119.35(19) . . ?
C35 C36 H36 120.3 . . ?
C37 C36 H36 120.3 . . ?
C36 C37 C38 120.20(19) . . ?
C36 C37 H37 119.9 . . ?
C38 C37 H37 119.9 . . ?
C33 C38 C37 120.91(18) . . ?
C33 C38 H38 119.5 . . ?
C37 C38 H38 119.5 . . ?
Cl4A C39A Cl3A 113.8(3) . . ?
Cl4A C39A H39A 108.8 . . ?
Cl3A C39A H39A 108.8 . . ?
Cl4A C39A H39B 108.8 . . ?
Cl3A C39A H39B 108.8 . . ?
H39A C39A H39B 107.7 . . ?
Cl3B C39B Cl4B 109.6(7) . . ?
Cl3B C39B H39C 109.7 . . ?
Cl4B C39B H39C 109.7 . . ?
Cl3B C39B H39D 109.7 . . ?
Cl4B C39B H39D 109.7 . . ?
H39C C39B H39D 108.2 . . ?
 
loop_
 _geom_torsion_atom_site_label_1
 _geom_torsion_atom_site_label_2
 _geom_torsion_atom_site_label_3
 _geom_torsion_atom_site_label_4
 _geom_torsion
 _geom_torsion_site_symmetry_1
 _geom_torsion_site_symmetry_2
 _geom_torsion_site_symmetry_3
 _geom_torsion_site_symmetry_4
 _geom_torsion_publ_flag
N2 P1 P2 N1 -166.02(12) . . . . ?
Cl1 P1 P2 N1 -85.18(9) . . . . ?
N1 P1 P2 N2 166.02(12) . . . . ?
Cl1 P1 P2 N2 80.84(8) . . . . ?
N1 P1 P2 Cl2 81.19(9) . . . . ?
N2 P1 P2 Cl2 -84.83(8) . . . . ?
Cl1 P1 P2 Cl2 -3.99(4) . . . . ?
N2 P2 N1 C1 -177.09(18) . . . . ?
Cl2 P2 N1 C1 79.13(17) . . . . ?
P1 P2 N1 C1 -167.8(2) . . . . ?
N2 P2 N1 P1 -9.28(8) . . . . ?
Cl2 P2 N1 P1 -113.06(6) . . . . ?
N2 P1 N1 C1 177.46(17) . . . . ?
Cl1 P1 N1 C1 -80.49(16) . . . . ?
P2 P1 N1 C1 168.2(2) . . . . ?
N2 P1 N1 P2 9.24(8) . . . . ?
Cl1 P1 N1 P2 111.29(6) . . . . ?
N1 P2 N2 C20 162.51(17) . . . . ?
Cl2 P2 N2 C20 -96.19(16) . . . . ?
P1 P2 N2 C20 153.2(2) . . . . ?
N1 P2 N2 P1 9.27(8) . . . . ?
Cl2 P2 N2 P1 110.57(6) . . . . ?
N1 P1 N2 C20 -164.81(15) . . . . ?
Cl1 P1 N2 C20 90.15(14) . . . . ?
P2 P1 N2 C20 -155.58(19) . . . . ?
N1 P1 N2 P2 -9.23(8) . . . . ?
Cl1 P1 N2 P2 -114.28(6) . . . . ?
P2 N1 C1 C8 -85.0(2) . . . . ?
P1 N1 C1 C8 110.74(17) . . . . ?
P2 N1 C1 C2 156.39(14) . . . . ?
P1 N1 C1 C2 -7.9(2) . . . . ?
P2 N1 C1 C14 34.2(2) . . . . ?
P1 N1 C1 C14 -130.08(16) . . . . ?
N1 C1 C2 C3 118.86(18) . . . . ?
C8 C1 C2 C3 -0.6(2) . . . . ?
C14 C1 C2 C3 -122.07(19) . . . . ?
N1 C1 C2 C7 -58.9(2) . . . . ?
C8 C1 C2 C7 -178.36(17) . . . . ?
C14 C1 C2 C7 60.2(2) . . . . ?
C7 C2 C3 C4 -0.5(3) . . . . ?
C1 C2 C3 C4 -178.30(17) . . . . ?
C2 C3 C4 C5 -0.1(3) . . . . ?
C3 C4 C5 C6 0.6(3) . . . . ?
C4 C5 C6 C7 -0.4(3) . . . . ?
C5 C6 C7 C2 -0.3(3) . . . . ?
C3 C2 C7 C6 0.7(3) . . . . ?
C1 C2 C7 C6 178.53(17) . . . . ?
N1 C1 C8 C13 -25.6(3) . . . . ?
C2 C1 C8 C13 90.7(2) . . . . ?
C14 C1 C8 C13 -144.91(19) . . . . ?
N1 C1 C8 C9 161.52(18) . . . . ?
C2 C1 C8 C9 -82.2(2) . . . . ?
C14 C1 C8 C9 42.2(2) . . . . ?
C13 C8 C9 C10 -0.4(3) . . . . ?
C1 C8 C9 C10 172.7(2) . . . . ?
C8 C9 C10 C11 0.0(4) . . . . ?
C9 C10 C11 C12 0.7(4) . . . . ?
C10 C11 C12 C13 -1.1(4) . . . . ?
C9 C8 C13 C12 0.0(3) . . . . ?
C1 C8 C13 C12 -173.0(2) . . . . ?
C11 C12 C13 C8 0.8(3) . . . . ?
N1 C1 C14 C15 117.6(2) . . . . ?
C8 C1 C14 C15 -121.8(2) . . . . ?
C2 C1 C14 C15 0.2(3) . . . . ?
N1 C1 C14 C19 -66.2(2) . . . . ?
C8 C1 C14 C19 54.4(2) . . . . ?
C2 C1 C14 C19 176.46(16) . . . . ?
C19 C14 C15 C16 1.9(3) . . . . ?
C1 C14 C15 C16 178.13(19) . . . . ?
C14 C15 C16 C17 -0.6(3) . . . . ?
C15 C16 C17 C18 -0.3(3) . . . . ?
C16 C17 C18 C19 -0.2(3) . . . . ?
C17 C18 C19 C14 1.5(3) . . . . ?
C15 C14 C19 C18 -2.4(3) . . . . ?
C1 C14 C19 C18 -178.84(18) . . . . ?
P2 N2 C20 C33 114.38(17) . . . . ?
P1 N2 C20 C33 -98.77(17) . . . . ?
P2 N2 C20 C27 -0.6(2) . . . . ?
P1 N2 C20 C27 146.21(13) . . . . ?
P2 N2 C20 C21 -123.02(16) . . . . ?
P1 N2 C20 C21 23.8(2) . . . . ?
N2 C20 C21 C26 -110.4(2) . . . . ?
C33 C20 C21 C26 10.8(3) . . . . ?
C27 C20 C21 C26 130.0(2) . . . . ?
N2 C20 C21 C22 65.9(2) . . . . ?
C33 C20 C21 C22 -172.96(18) . . . . ?
C27 C20 C21 C22 -53.8(2) . . . . ?
C26 C21 C22 C23 -1.7(3) . . . . ?
C20 C21 C22 C23 -178.2(2) . . . . ?
C21 C22 C23 C24 -0.2(4) . . . . ?
C22 C23 C24 C25 1.7(4) . . . . ?
C23 C24 C25 C26 -1.2(4) . . . . ?
C22 C21 C26 C25 2.2(3) . . . . ?
C20 C21 C26 C25 178.55(19) . . . . ?
C24 C25 C26 C21 -0.8(4) . . . . ?
N2 C20 C27 C28 -129.55(18) . . . . ?
C33 C20 C27 C28 111.5(2) . . . . ?
C21 C20 C27 C28 -12.4(2) . . . . ?
N2 C20 C27 C32 56.3(2) . . . . ?
C33 C20 C27 C32 -62.6(2) . . . . ?
C21 C20 C27 C32 173.51(16) . . . . ?
C32 C27 C28 C29 -2.5(3) . . . . ?
C20 C27 C28 C29 -176.66(18) . . . . ?
C27 C28 C29 C30 -0.4(3) . . . . ?
C28 C29 C30 C31 2.0(3) . . . . ?
C29 C30 C31 C32 -0.4(3) . . . . ?
C30 C31 C32 C27 -2.6(3) . . . . ?
C28 C27 C32 C31 4.1(3) . . . . ?
C20 C27 C32 C31 178.55(17) . . . . ?
N2 C20 C33 C38 -9.5(3) . . . . ?
C27 C20 C33 C38 108.5(2) . . . . ?
C21 C20 C33 C38 -127.3(2) . . . . ?
N2 C20 C33 C34 177.24(19) . . . . ?
C27 C20 C33 C34 -64.8(2) . . . . ?
C21 C20 C33 C34 59.4(3) . . . . ?
C38 C33 C34 C35 0.2(3) . . . . ?
C20 C33 C34 C35 173.8(2) . . . . ?
C33 C34 C35 C36 -1.5(4) . . . . ?
C34 C35 C36 C37 1.7(4) . . . . ?
C35 C36 C37 C38 -0.5(4) . . . . ?
C34 C33 C38 C37 0.9(3) . . . . ?
C20 C33 C38 C37 -172.4(2) . . . . ?
C36 C37 C38 C33 -0.7(3) . . . . ?
 
_diffrn_measured_fraction_theta_max    0.981
_diffrn_reflns_theta_full              28.00
_diffrn_measured_fraction_theta_full   0.981
_refine_diff_density_max    0.318
_refine_diff_density_min   -0.270
_refine_diff_density_rms    0.050

#=============================================================================
 
data_av_aw151a_(PhNP(NPhPCl2))2

_audit_author_name                'Villinger, A.' 
_audit_creation_method            SHELXL-97 

#==============================================================================

# CHEMICAL DATA

_chemical_name_systematic
;
 ?
;
_chemical_name_common             ?
_chemical_melting_point           ?
_chemical_formula_moiety          'C24 H20 Cl4 N4 P4'
_chemical_formula_sum
 'C24 H20 Cl4 N4 P4'
_chemical_formula_weight          630.12
 
loop_
 _atom_type_symbol
 _atom_type_description
 _atom_type_scat_dispersion_real
 _atom_type_scat_dispersion_imag
 _atom_type_scat_source
 'C'  'C'   0.0033   0.0016
 'International Tables Vol C Tables 4.2.6.8 and 6.1.1.4'
 'H'  'H'   0.0000   0.0000
 'International Tables Vol C Tables 4.2.6.8 and 6.1.1.4'
 'N'  'N'   0.0061   0.0033
 'International Tables Vol C Tables 4.2.6.8 and 6.1.1.4'
 'P'  'P'   0.1023   0.0942
 'International Tables Vol C Tables 4.2.6.8 and 6.1.1.4'
 'Cl'  'Cl'   0.1484   0.1585
 'International Tables Vol C Tables 4.2.6.8 and 6.1.1.4'
 
#==============================================================================

# CRYSTAL DATA
 
_symmetry_cell_setting            triclinic
_symmetry_space_group_name_H-M    'P -1'
_symmetry_space_group_name_Hall   '-P 1'
_symmetry_Int_Tables_number       2
 
loop_
 _symmetry_equiv_pos_as_xyz
 'x, y, z'
 '-x, -y, -z'
 
_cell_length_a                    9.3256(4)
_cell_length_b                    9.3338(4)
_cell_length_c                    17.1117(7)
_cell_angle_alpha                 105.682(2)
_cell_angle_beta                  102.272(2)
_cell_angle_gamma                 90.335(2)
_cell_volume                      1398.07(10)
_cell_formula_units_Z             2
_cell_measurement_temperature     173(2)
_cell_measurement_reflns_used     3895  
_cell_measurement_theta_min       5.072
_cell_measurement_theta_max       48.999
 
_exptl_crystal_description        block
_exptl_crystal_colour             colourless
_exptl_crystal_size_max           0.11
_exptl_crystal_size_mid           0.07
_exptl_crystal_size_min           0.04
_exptl_crystal_density_meas       ?
_exptl_crystal_density_diffrn     1.497
_exptl_crystal_density_method     'not measured'
_exptl_crystal_F_000              640
_exptl_absorpt_coefficient_mu     0.675
_exptl_absorpt_correction_type    multi-scan
_exptl_absorpt_correction_T_min   0.9294
_exptl_absorpt_correction_T_max   0.9735
_exptl_absorpt_process_details    '(SADABS; Sheldrick, 2004)'

#==============================================================================

# EXPERIMENTAL DATA
 
_exptl_special_details
;
 ?
;
 
_diffrn_ambient_temperature       173(2)
_diffrn_radiation_wavelength      0.71073
_diffrn_radiation_type            MoK\a
_diffrn_radiation_source          'sealed tube'
_diffrn_radiation_monochromator   graphite
_diffrn_measurement_device_type   'Bruker Apex Kappa II-CCD-diffractometer'
_diffrn_measurement_method        'phi and omega scans'
_diffrn_detector_area_resol_mean  ?
_diffrn_standards_number          ?
_diffrn_standards_interval_count  ?
_diffrn_standards_interval_time   ?
_diffrn_standards_decay_%         ?
_diffrn_reflns_number             30997
_diffrn_reflns_av_R_equivalents   0.0728
_diffrn_reflns_av_sigmaI/netI     0.0894
_diffrn_reflns_limit_h_min        -11
_diffrn_reflns_limit_h_max        11
_diffrn_reflns_limit_k_min        -11
_diffrn_reflns_limit_k_max        11
_diffrn_reflns_limit_l_min        -21
_diffrn_reflns_limit_l_max        21
_diffrn_reflns_theta_min          1.27
_diffrn_reflns_theta_max          27.00
_reflns_number_total              6090
_reflns_number_gt                 3646
_reflns_threshold_expression      >2\s(I)
 
_computing_data_collection        'Bruker Apex V7.51A'
_computing_cell_refinement        'Bruker Apex V7.51A'
_computing_data_reduction         'Bruker SAINT'
_computing_structure_solution     'SHELXS-97 (Sheldrick, 1997)'
_computing_structure_refinement   'SHELXL-97 (Sheldrick, 1997)'
_computing_molecular_graphics     'ORTEP-3v2.01 (Farrugia, 1997)' 
_computing_publication_material   'SHELXL-97'

#==============================================================================

# REFINEMENT DATA 

_refine_special_details
;
 All H atoms were positioned geometrically and refined using a riding model, 
 with C---H = 0.98 (methyl groups), 0.99\%A (methylene groups), 1.00\%A 
 (methine groups) or 0.95 \%A (aryl CH) and with <i>U</i>~iso~(H) = 1.5 times 
 <i>U</i>~eq~(C) (methyl groups) or with <i>U</i>~iso~(H) = 1.2 times 
 <i>U</i>~eq~(C) (methylene  groups, aryl CH, methine groups). Torsion angles 
 of all methyl groups were allowed to refine.
 
 Refinement of F^2^ against ALL reflections.  The weighted R-factor wR and
 goodness of fit S are based on F^2^, conventional R-factors R are based
 on F, with F set to zero for negative F^2^. The threshold expression of
 F^2^ > 2\s(F^2^) is used only for calculating R-factors(gt) etc. and is
 not relevant to the choice of reflections for refinement.  R-factors based
 on F^2^ are statistically about twice as large as those based on F, and R-
 factors based on ALL data will be even larger.
;
 
_refine_ls_structure_factor_coef  Fsqd
_refine_ls_matrix_type            full
_refine_ls_weighting_scheme       calc
_refine_ls_weighting_details
 'calc w=1/[\s^2^(Fo^2^)+(0.0377P)^2^+0.0000P] where P=(Fo^2^+2Fc^2^)/3'
_atom_sites_solution_primary      direct
_atom_sites_solution_secondary    difmap
_atom_sites_solution_hydrogens    geom
_refine_ls_hydrogen_treatment     constr
_refine_ls_extinction_method      none
_refine_ls_extinction_coef        ?
_refine_ls_number_reflns          6090
_refine_ls_number_parameters      325
_refine_ls_number_restraints      0
_refine_ls_R_factor_all           0.1079
_refine_ls_R_factor_gt            0.0482
_refine_ls_wR_factor_ref          0.0962
_refine_ls_wR_factor_gt           0.0840
_refine_ls_goodness_of_fit_ref    0.988
_refine_ls_restrained_S_all       0.988
_refine_ls_shift/su_max           0.001
_refine_ls_shift/su_mean          0.000

#==============================================================================

# ATOMIC COORDINATES AND DISPLACEMENT PARAMETERS
 
loop_
 _atom_site_label
 _atom_site_type_symbol
 _atom_site_fract_x
 _atom_site_fract_y
 _atom_site_fract_z
 _atom_site_U_iso_or_equiv
 _atom_site_adp_type
 _atom_site_occupancy
 _atom_site_symmetry_multiplicity
 _atom_site_calc_flag
 _atom_site_refinement_flags
 _atom_site_disorder_assembly
 _atom_site_disorder_group
P1 P 0.14078(7) 1.00211(8) 0.53318(4) 0.02360(19) Uani 1 1 d . . .
P2 P 0.37495(8) 0.80948(9) 0.51926(5) 0.0305(2) Uani 1 1 d . . .
Cl1 Cl 0.34901(8) 0.60391(9) 0.53966(5) 0.0426(2) Uani 1 1 d . . .
Cl2 Cl 0.46248(8) 0.73905(11) 0.41563(5) 0.0480(2) Uani 1 1 d . . .
N1 N 0.0261(2) 1.0555(2) 0.45533(13) 0.0224(5) Uani 1 1 d . . .
N2 N 0.2020(2) 0.8396(2) 0.47705(13) 0.0243(6) Uani 1 1 d . . .
C1 C 0.0600(3) 1.1242(3) 0.39702(17) 0.0238(7) Uani 1 1 d . . .
C2 C 0.1901(3) 1.2142(3) 0.41702(18) 0.0307(7) Uani 1 1 d . . .
H2 H 0.2540 1.2311 0.4703 0.037 Uiso 1 1 calc R . .
C3 C 0.2256(3) 1.2785(4) 0.3593(2) 0.0372(8) Uani 1 1 d . . .
H3 H 0.3154 1.3377 0.3728 0.045 Uiso 1 1 calc R . .
C4 C 0.1327(3) 1.2582(3) 0.28201(19) 0.0368(8) Uani 1 1 d . . .
H4 H 0.1573 1.3030 0.2425 0.044 Uiso 1 1 calc R . .
C5 C 0.0037(3) 1.1713(4) 0.26378(19) 0.0392(8) Uani 1 1 d . . .
H5 H -0.0616 1.1574 0.2111 0.047 Uiso 1 1 calc R . .
C6 C -0.0332(3) 1.1041(3) 0.31985(18) 0.0315(7) Uani 1 1 d . . .
H6 H -0.1225 1.0440 0.3055 0.038 Uiso 1 1 calc R . .
C7 C 0.1056(3) 0.7387(3) 0.40507(17) 0.0244(7) Uani 1 1 d . . .
C8 C 0.1069(3) 0.7506(3) 0.32649(18) 0.0327(8) Uani 1 1 d . . .
H8 H 0.1744 0.8195 0.3189 0.039 Uiso 1 1 calc R . .
C9 C 0.0066(3) 0.6590(3) 0.25848(18) 0.0381(8) Uani 1 1 d . . .
H9 H 0.0061 0.6654 0.2040 0.046 Uiso 1 1 calc R . .
C10 C -0.0912(3) 0.5600(4) 0.2695(2) 0.0424(9) Uani 1 1 d . . .
H10 H -0.1592 0.4987 0.2227 0.051 Uiso 1 1 calc R . .
C11 C -0.0915(3) 0.5488(3) 0.3483(2) 0.0389(8) Uani 1 1 d . . .
H11 H -0.1595 0.4801 0.3556 0.047 Uiso 1 1 calc R . .
C12 C 0.0071(3) 0.6376(3) 0.41636(18) 0.0316(7) Uani 1 1 d . . .
H12 H 0.0076 0.6297 0.4706 0.038 Uiso 1 1 calc R . .
P3 P 0.64169(7) 0.52463(8) 0.03266(4) 0.02352(19) Uani 1 1 d . . .
P4 P 0.88128(8) 0.70553(9) 0.02404(5) 0.0322(2) Uani 1 1 d . . .
N3 N 0.4788(2) 0.5983(2) 0.04765(13) 0.0233(6) Uani 1 1 d . . .
N4 N 0.7076(2) 0.6376(2) -0.01915(13) 0.0240(6) Uani 1 1 d . . .
Cl3 Cl 0.97561(8) 0.66604(10) -0.07762(5) 0.0438(2) Uani 1 1 d . . .
Cl4 Cl 0.86350(9) 0.93099(10) 0.04103(6) 0.0594(3) Uani 1 1 d . . .
C13 C 0.4510(3) 0.7173(3) 0.11221(17) 0.0234(7) Uani 1 1 d . . .
C14 C 0.5552(3) 0.7677(3) 0.18697(17) 0.0308(7) Uani 1 1 d . . .
H14 H 0.6463 0.7226 0.1944 0.037 Uiso 1 1 calc R . .
C15 C 0.5261(3) 0.8824(3) 0.24992(19) 0.0378(8) Uani 1 1 d . . .
H15 H 0.5980 0.9170 0.3005 0.045 Uiso 1 1 calc R . .
C16 C 0.3940(3) 0.9477(4) 0.2405(2) 0.0412(8) Uani 1 1 d . . .
H16 H 0.3738 1.0252 0.2850 0.049 Uiso 1 1 calc R . .
C17 C 0.2917(3) 0.9007(4) 0.1668(2) 0.0443(9) Uani 1 1 d . . .
H17 H 0.2009 0.9465 0.1600 0.053 Uiso 1 1 calc R . .
C18 C 0.3200(3) 0.7865(3) 0.10211(19) 0.0362(8) Uani 1 1 d . . .
H18 H 0.2495 0.7556 0.0508 0.043 Uiso 1 1 calc R . .
C19 C 0.6121(3) 0.6756(3) -0.08858(17) 0.0249(7) Uani 1 1 d . . .
C20 C 0.5224(3) 0.7929(3) -0.07366(18) 0.0315(8) Uani 1 1 d . . .
H20 H 0.5264 0.8516 -0.0184 0.038 Uiso 1 1 calc R . .
C21 C 0.4272(3) 0.8238(4) -0.1398(2) 0.0383(8) Uani 1 1 d . . .
H21 H 0.3657 0.9045 -0.1300 0.046 Uiso 1 1 calc R . .
C22 C 0.4210(3) 0.7376(4) -0.2203(2) 0.0381(8) Uani 1 1 d . . .
H22 H 0.3557 0.7593 -0.2658 0.046 Uiso 1 1 calc R . .
C23 C 0.5098(3) 0.6203(3) -0.23436(18) 0.0331(8) Uani 1 1 d . . .
H23 H 0.5050 0.5606 -0.2896 0.040 Uiso 1 1 calc R . .
C24 C 0.6055(3) 0.5889(3) -0.16871(17) 0.0279(7) Uani 1 1 d . . .
H24 H 0.6666 0.5079 -0.1786 0.033 Uiso 1 1 calc R . .
 
loop_
 _atom_site_aniso_label
 _atom_site_aniso_U_11
 _atom_site_aniso_U_22
 _atom_site_aniso_U_33
 _atom_site_aniso_U_23
 _atom_site_aniso_U_13
 _atom_site_aniso_U_12
P1 0.0238(4) 0.0236(4) 0.0211(4) 0.0047(3) 0.0019(3) 0.0029(3)
P2 0.0236(4) 0.0345(5) 0.0290(5) 0.0058(4) 0.0001(3) 0.0062(3)
Cl1 0.0452(5) 0.0434(5) 0.0441(5) 0.0223(4) 0.0071(4) 0.0150(4)
Cl2 0.0334(4) 0.0748(7) 0.0445(5) 0.0239(5) 0.0175(4) 0.0173(4)
N1 0.0215(11) 0.0252(14) 0.0210(13) 0.0080(11) 0.0035(10) 0.0038(10)
N2 0.0227(12) 0.0233(14) 0.0241(13) 0.0028(11) 0.0039(10) 0.0055(10)
C1 0.0268(15) 0.0223(17) 0.0233(16) 0.0057(13) 0.0081(12) 0.0097(12)
C2 0.0281(16) 0.040(2) 0.0237(17) 0.0113(15) 0.0027(13) 0.0031(14)
C3 0.0300(16) 0.043(2) 0.042(2) 0.0142(17) 0.0112(15) 0.0008(15)
C4 0.0405(18) 0.042(2) 0.037(2) 0.0202(16) 0.0143(15) 0.0101(16)
C5 0.0432(19) 0.047(2) 0.0245(18) 0.0117(16) -0.0019(15) 0.0070(16)
C6 0.0330(16) 0.037(2) 0.0247(17) 0.0120(15) 0.0019(13) -0.0032(14)
C7 0.0222(14) 0.0233(17) 0.0233(17) 0.0014(13) 0.0022(12) 0.0059(12)
C8 0.0397(17) 0.0300(19) 0.0274(18) 0.0082(15) 0.0051(14) 0.0053(14)
C9 0.051(2) 0.040(2) 0.0184(17) 0.0036(15) 0.0031(15) 0.0125(17)
C10 0.0404(19) 0.034(2) 0.036(2) -0.0052(16) -0.0086(15) 0.0023(16)
C11 0.0326(17) 0.032(2) 0.046(2) 0.0007(16) 0.0083(15) -0.0015(14)
C12 0.0366(17) 0.0283(18) 0.0286(18) 0.0052(14) 0.0078(14) 0.0074(14)
P3 0.0227(4) 0.0256(5) 0.0204(4) 0.0048(3) 0.0032(3) -0.0016(3)
P4 0.0246(4) 0.0435(6) 0.0250(4) 0.0076(4) 0.0007(3) -0.0078(4)
N3 0.0239(12) 0.0219(14) 0.0211(13) 0.0013(11) 0.0045(10) 0.0000(10)
N4 0.0227(12) 0.0276(15) 0.0217(13) 0.0091(11) 0.0020(10) -0.0026(10)
Cl3 0.0274(4) 0.0663(6) 0.0349(5) 0.0069(4) 0.0105(3) 0.0000(4)
Cl4 0.0520(5) 0.0366(5) 0.0777(7) -0.0085(5) 0.0208(5) -0.0160(4)
C13 0.0274(15) 0.0232(17) 0.0220(16) 0.0070(13) 0.0097(12) -0.0004(13)
C14 0.0287(16) 0.0332(19) 0.0267(17) 0.0051(15) 0.0018(13) 0.0001(13)
C15 0.0446(19) 0.033(2) 0.0270(18) -0.0019(15) 0.0028(15) -0.0049(15)
C16 0.052(2) 0.033(2) 0.037(2) -0.0028(16) 0.0200(16) -0.0003(16)
C17 0.0353(18) 0.046(2) 0.047(2) -0.0002(18) 0.0153(16) 0.0100(16)
C18 0.0282(16) 0.038(2) 0.0331(19) -0.0025(15) 0.0034(14) 0.0032(14)
C19 0.0229(14) 0.0285(18) 0.0247(17) 0.0109(14) 0.0041(12) -0.0036(13)
C20 0.0386(17) 0.0296(19) 0.0251(17) 0.0055(14) 0.0070(14) -0.0012(15)
C21 0.0366(17) 0.037(2) 0.044(2) 0.0157(17) 0.0082(15) 0.0109(15)
C22 0.0391(18) 0.044(2) 0.033(2) 0.0199(17) -0.0002(15) -0.0011(16)
C23 0.0335(17) 0.040(2) 0.0226(17) 0.0070(15) 0.0011(13) -0.0053(15)
C24 0.0274(15) 0.0302(18) 0.0269(17) 0.0090(14) 0.0067(13) -0.0016(13)

#==============================================================================

# MOLECULAR GEOMETRY
 
_geom_special_details
;
 All s.u.'s (except the s.u. in the dihedral angle between two l.s. planes)
 are estimated using the full covariance matrix.  The cell s.u.'s are taken
 into account individually in the estimation of s.u.'s in distances, angles
 and torsion angles; correlations between s.u.'s in cell parameters are only
 used when they are defined by crystal symmetry.  An approximate (isotropic)
 treatment of cell s.u.'s is used for estimating s.u.'s involving l.s. planes.
;
 
loop_
 _geom_bond_atom_site_label_1
 _geom_bond_atom_site_label_2
 _geom_bond_distance
 _geom_bond_site_symmetry_2
 _geom_bond_publ_flag
P1 N1 1.710(2) 2_576 ?
P1 N1 1.711(2) . ?
P1 N2 1.734(2) . ?
P1 P1 2.6254(13) 2_576 ?
P2 N2 1.680(2) . ?
P2 Cl2 2.0577(12) . ?
P2 Cl1 2.0627(12) . ?
N1 C1 1.409(3) . ?
N1 P1 1.710(2) 2_576 ?
N2 C7 1.450(3) . ?
C1 C6 1.382(4) . ?
C1 C2 1.396(4) . ?
C2 C3 1.381(4) . ?
C2 H2 0.9500 . ?
C3 C4 1.382(4) . ?
C3 H3 0.9500 . ?
C4 C5 1.376(4) . ?
C4 H4 0.9500 . ?
C5 C6 1.377(4) . ?
C5 H5 0.9500 . ?
C6 H6 0.9500 . ?
C7 C8 1.381(4) . ?
C7 C12 1.391(4) . ?
C8 C9 1.397(4) . ?
C8 H8 0.9500 . ?
C9 C10 1.371(4) . ?
C9 H9 0.9500 . ?
C10 C11 1.380(4) . ?
C10 H10 0.9500 . ?
C11 C12 1.379(4) . ?
C11 H11 0.9500 . ?
C12 H12 0.9500 . ?
P3 N3 1.712(2) . ?
P3 N3 1.716(2) 2_665 ?
P3 N4 1.733(2) . ?
P3 P3 2.6262(13) 2_665 ?
P4 N4 1.672(2) . ?
P4 Cl4 2.0577(13) . ?
P4 Cl3 2.0599(12) . ?
N3 C13 1.408(3) . ?
N3 P3 1.716(2) 2_665 ?
N4 C19 1.453(3) . ?
C13 C18 1.386(4) . ?
C13 C14 1.394(3) . ?
C14 C15 1.373(4) . ?
C14 H14 0.9500 . ?
C15 C16 1.376(4) . ?
C15 H15 0.9500 . ?
C16 C17 1.371(4) . ?
C16 H16 0.9500 . ?
C17 C18 1.386(4) . ?
C17 H17 0.9500 . ?
C18 H18 0.9500 . ?
C19 C24 1.379(4) . ?
C19 C20 1.383(4) . ?
C20 C21 1.380(4) . ?
C20 H20 0.9500 . ?
C21 C22 1.384(4) . ?
C21 H21 0.9500 . ?
C22 C23 1.377(4) . ?
C22 H22 0.9500 . ?
C23 C24 1.378(4) . ?
C23 H23 0.9500 . ?
C24 H24 0.9500 . ?
 
loop_
 _geom_angle_atom_site_label_1
 _geom_angle_atom_site_label_2
 _geom_angle_atom_site_label_3
 _geom_angle
 _geom_angle_site_symmetry_1
 _geom_angle_site_symmetry_3
 _geom_angle_publ_flag
N1 P1 N1 79.75(12) 2_576 . ?
N1 P1 N2 103.13(11) 2_576 . ?
N1 P1 N2 101.11(11) . . ?
N1 P1 P1 39.88(7) 2_576 2_576 ?
N1 P1 P1 39.88(8) . 2_576 ?
N2 P1 P1 105.88(8) . 2_576 ?
N2 P2 Cl2 101.76(9) . . ?
N2 P2 Cl1 102.27(9) . . ?
Cl2 P2 Cl1 97.53(5) . . ?
C1 N1 P1 130.00(17) . 2_576 ?
C1 N1 P1 129.74(17) . . ?
P1 N1 P1 100.25(12) 2_576 . ?
C7 N2 P2 125.54(18) . . ?
C7 N2 P1 121.42(16) . . ?
P2 N2 P1 112.89(12) . . ?
C6 C1 C2 119.1(3) . . ?
C6 C1 N1 121.2(2) . . ?
C2 C1 N1 119.8(2) . . ?
C3 C2 C1 119.9(3) . . ?
C3 C2 H2 120.0 . . ?
C1 C2 H2 120.0 . . ?
C2 C3 C4 121.0(3) . . ?
C2 C3 H3 119.5 . . ?
C4 C3 H3 119.5 . . ?
C5 C4 C3 118.3(3) . . ?
C5 C4 H4 120.8 . . ?
C3 C4 H4 120.8 . . ?
C4 C5 C6 121.7(3) . . ?
C4 C5 H5 119.1 . . ?
C6 C5 H5 119.1 . . ?
C5 C6 C1 119.9(3) . . ?
C5 C6 H6 120.1 . . ?
C1 C6 H6 120.1 . . ?
C8 C7 C12 120.9(3) . . ?
C8 C7 N2 119.4(3) . . ?
C12 C7 N2 119.6(3) . . ?
C7 C8 C9 118.4(3) . . ?
C7 C8 H8 120.8 . . ?
C9 C8 H8 120.8 . . ?
C10 C9 C8 120.8(3) . . ?
C10 C9 H9 119.6 . . ?
C8 C9 H9 119.6 . . ?
C9 C10 C11 120.3(3) . . ?
C9 C10 H10 119.9 . . ?
C11 C10 H10 119.9 . . ?
C12 C11 C10 120.0(3) . . ?
C12 C11 H11 120.0 . . ?
C10 C11 H11 120.0 . . ?
C11 C12 C7 119.6(3) . . ?
C11 C12 H12 120.2 . . ?
C7 C12 H12 120.2 . . ?
N3 P3 N3 79.97(11) . 2_665 ?
N3 P3 N4 102.80(11) . . ?
N3 P3 N4 101.39(11) 2_665 . ?
N3 P3 P3 40.04(7) . 2_665 ?
N3 P3 P3 39.92(7) 2_665 2_665 ?
N4 P3 P3 105.86(8) . 2_665 ?
N4 P4 Cl4 102.03(9) . . ?
N4 P4 Cl3 102.37(9) . . ?
Cl4 P4 Cl3 97.26(5) . . ?
C13 N3 P3 129.72(17) . . ?
C13 N3 P3 130.00(18) . 2_665 ?
P3 N3 P3 100.03(11) . 2_665 ?
C19 N4 P4 125.57(18) . . ?
C19 N4 P3 120.93(16) . . ?
P4 N4 P3 113.30(12) . . ?
C18 C13 C14 119.0(3) . . ?
C18 C13 N3 120.4(2) . . ?
C14 C13 N3 120.5(2) . . ?
C15 C14 C13 120.0(3) . . ?
C15 C14 H14 120.0 . . ?
C13 C14 H14 120.0 . . ?
C14 C15 C16 120.7(3) . . ?
C14 C15 H15 119.6 . . ?
C16 C15 H15 119.6 . . ?
C17 C16 C15 119.8(3) . . ?
C17 C16 H16 120.1 . . ?
C15 C16 H16 120.1 . . ?
C16 C17 C18 120.3(3) . . ?
C16 C17 H17 119.8 . . ?
C18 C17 H17 119.8 . . ?
C17 C18 C13 120.1(3) . . ?
C17 C18 H18 120.0 . . ?
C13 C18 H18 120.0 . . ?
C24 C19 C20 120.4(3) . . ?
C24 C19 N4 119.6(3) . . ?
C20 C19 N4 119.9(2) . . ?
C21 C20 C19 119.5(3) . . ?
C21 C20 H20 120.3 . . ?
C19 C20 H20 120.3 . . ?
C20 C21 C22 120.2(3) . . ?
C20 C21 H21 119.9 . . ?
C22 C21 H21 119.9 . . ?
C23 C22 C21 119.8(3) . . ?
C23 C22 H22 120.1 . . ?
C21 C22 H22 120.1 . . ?
C22 C23 C24 120.3(3) . . ?
C22 C23 H23 119.8 . . ?
C24 C23 H23 119.8 . . ?
C23 C24 C19 119.7(3) . . ?
C23 C24 H24 120.1 . . ?
C19 C24 H24 120.1 . . ?
 
loop_
 _geom_torsion_atom_site_label_1
 _geom_torsion_atom_site_label_2
 _geom_torsion_atom_site_label_3
 _geom_torsion_atom_site_label_4
 _geom_torsion
 _geom_torsion_site_symmetry_1
 _geom_torsion_site_symmetry_2
 _geom_torsion_site_symmetry_3
 _geom_torsion_site_symmetry_4
 _geom_torsion_publ_flag
N1 P1 N1 C1 -178.7(3) 2_576 . . . ?
N2 P1 N1 C1 -77.1(2) . . . . ?
P1 P1 N1 C1 -178.7(3) 2_576 . . . ?
N1 P1 N1 P1 0.0 2_576 . . 2_576 ?
N2 P1 N1 P1 101.52(12) . . . 2_576 ?
Cl2 P2 N2 C7 46.7(2) . . . . ?
Cl1 P2 N2 C7 -53.8(2) . . . . ?
Cl2 P2 N2 P1 -137.62(11) . . . . ?
Cl1 P2 N2 P1 121.88(12) . . . . ?
N1 P1 N2 C7 45.5(2) 2_576 . . . ?
N1 P1 N2 C7 -36.4(2) . . . . ?
P1 P1 N2 C7 4.3(2) 2_576 . . . ?
N1 P1 N2 P2 -130.36(13) 2_576 . . . ?
N1 P1 N2 P2 147.71(13) . . . . ?
P1 P1 N2 P2 -171.52(10) 2_576 . . . ?
P1 N1 C1 C6 -25.9(4) 2_576 . . . ?
P1 N1 C1 C6 152.4(2) . . . . ?
P1 N1 C1 C2 154.2(2) 2_576 . . . ?
P1 N1 C1 C2 -27.5(4) . . . . ?
C6 C1 C2 C3 -1.6(4) . . . . ?
N1 C1 C2 C3 178.3(3) . . . . ?
C1 C2 C3 C4 1.5(5) . . . . ?
C2 C3 C4 C5 -0.3(5) . . . . ?
C3 C4 C5 C6 -0.7(5) . . . . ?
C4 C5 C6 C1 0.5(5) . . . . ?
C2 C1 C6 C5 0.6(4) . . . . ?
N1 C1 C6 C5 -179.3(3) . . . . ?
P2 N2 C7 C8 -89.6(3) . . . . ?
P1 N2 C7 C8 95.1(3) . . . . ?
P2 N2 C7 C12 94.4(3) . . . . ?
P1 N2 C7 C12 -80.9(3) . . . . ?
C12 C7 C8 C9 0.2(4) . . . . ?
N2 C7 C8 C9 -175.9(2) . . . . ?
C7 C8 C9 C10 0.2(4) . . . . ?
C8 C9 C10 C11 -0.3(5) . . . . ?
C9 C10 C11 C12 0.0(5) . . . . ?
C10 C11 C12 C7 0.4(4) . . . . ?
C8 C7 C12 C11 -0.5(4) . . . . ?
N2 C7 C12 C11 175.5(2) . . . . ?
N3 P3 N3 C13 174.6(3) 2_665 . . . ?
N4 P3 N3 C13 -85.8(3) . . . . ?
P3 P3 N3 C13 174.6(3) 2_665 . . . ?
N3 P3 N3 P3 0.0 2_665 . . 2_665 ?
N4 P3 N3 P3 99.52(12) . . . 2_665 ?
Cl4 P4 N4 C19 48.3(2) . . . . ?
Cl3 P4 N4 C19 -52.0(2) . . . . ?
Cl4 P4 N4 P3 -126.60(11) . . . . ?
Cl3 P4 N4 P3 133.08(11) . . . . ?
N3 P3 N4 C19 -46.1(2) . . . . ?
N3 P3 N4 C19 36.1(2) 2_665 . . . ?
P3 P3 N4 C19 -4.8(2) 2_665 . . . ?
N3 P3 N4 P4 129.06(13) . . . . ?
N3 P3 N4 P4 -148.79(13) 2_665 . . . ?
P3 P3 N4 P4 170.33(10) 2_665 . . . ?
P3 N3 C13 C18 162.2(2) . . . . ?
P3 N3 C13 C18 -24.7(4) 2_665 . . . ?
P3 N3 C13 C14 -17.4(4) . . . . ?
[truncated: 1,026 more chars]
